# Supplementary material for: Endogenous Alpha-Synuclein is Essential for the Transfer of Pathology by Exosome-Enriched Extracellular Vesicles, Following Inoculation with Preformed Fibrils in vivo
Source: PubMed Central journal article supplement (PMC10917543; doi:10.14336/ad.2023.0614), 2024-04-01
Supplement: AD-15-2-869-s.pdf [file AD-15-2-869-s.pdf]

## SUPPLEMENTARY DATA

# **Endogenous Alpha-Synuclein is Essential for the Transfer of Pathology by Exosome-Enriched Extracellular Vesicles, Following Inoculation with Preformed Fibrils *in vivo***

**Katerina Melachroinou, Georgios Divolis, George Tsafaras, Mantia Karampetsou, Sotirios Fortis, Yannis Stratoulis, Gina Papadopoulou, Anastasios G. Kriebardis, Martina Samiotaki, Kostas Vekrellis**

# SUPPLEMENTARY DATA

**A**

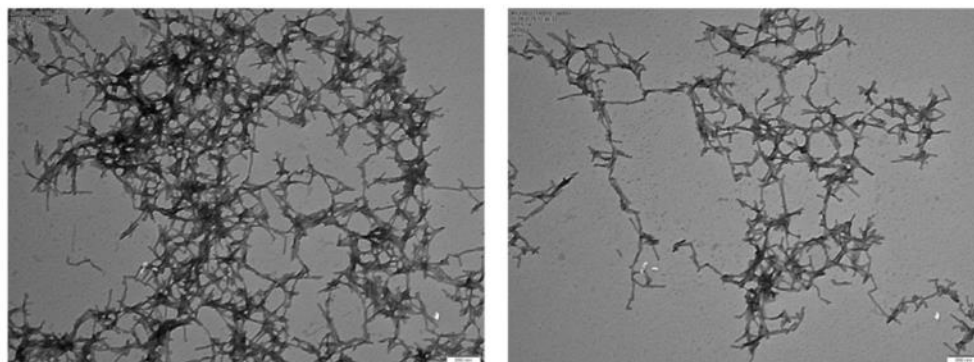

**B**

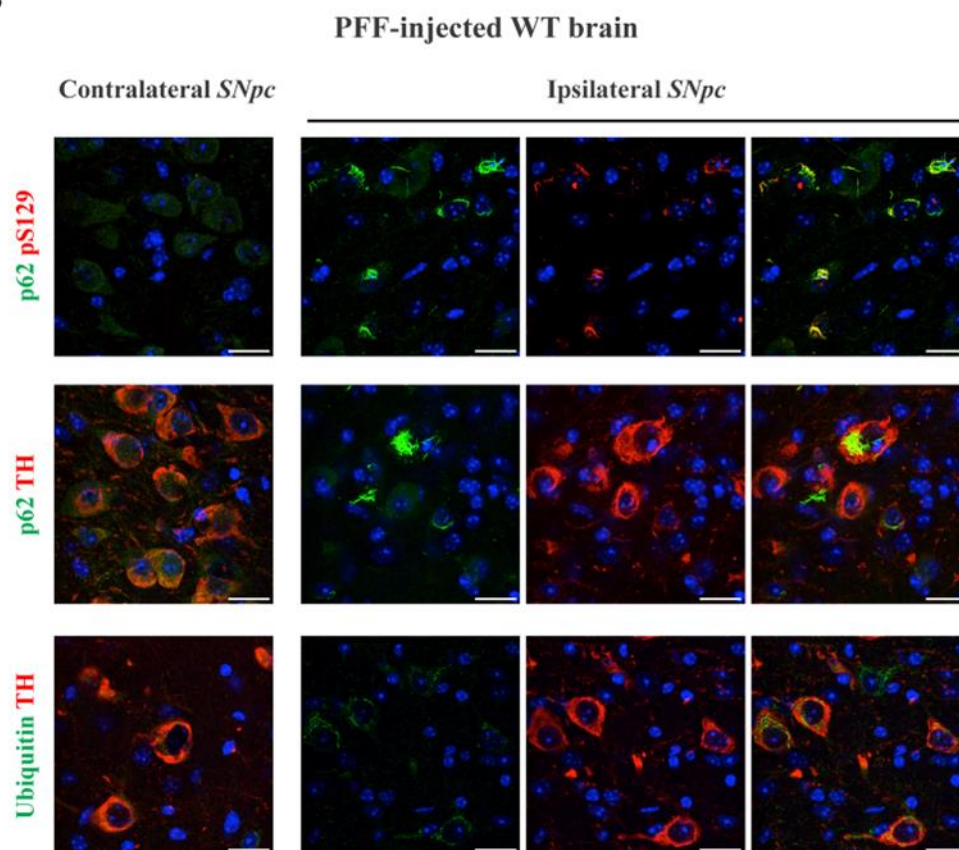

**Supplementary Figure 1. Intrastriatal inoculation of PFFs results in the accumulation of p62 and ubiquitin in the dopaminergic neurons of the ipsilateral *SNpc*, one-month post-injection.** (A) Negatively stained mouse PFFs visualized by TEM, verified the presence of  $\alpha$ -Syn fibrillar forms that were injected in the right dorsal *striatum* (scale bar 200  $\mu$ m). (B) De-convolved confocal images showing accumulation of either p62 or ubiquitin (green) within the TH (red) positive neurons and co-localization of accumulated p62 (green) and aggregated pS129 (5B9 clone, red) in the ipsilateral *SNpc* of WT mice injected with PFFs (63x lens, scale bar 20  $\mu$ m).  $\alpha$ -Syn: alpha-synuclein, PFFs: alpha-synuclein preformed fibrils, TEM: Transmission Electron Microscopy.

# SUPPLEMENTARY DATA

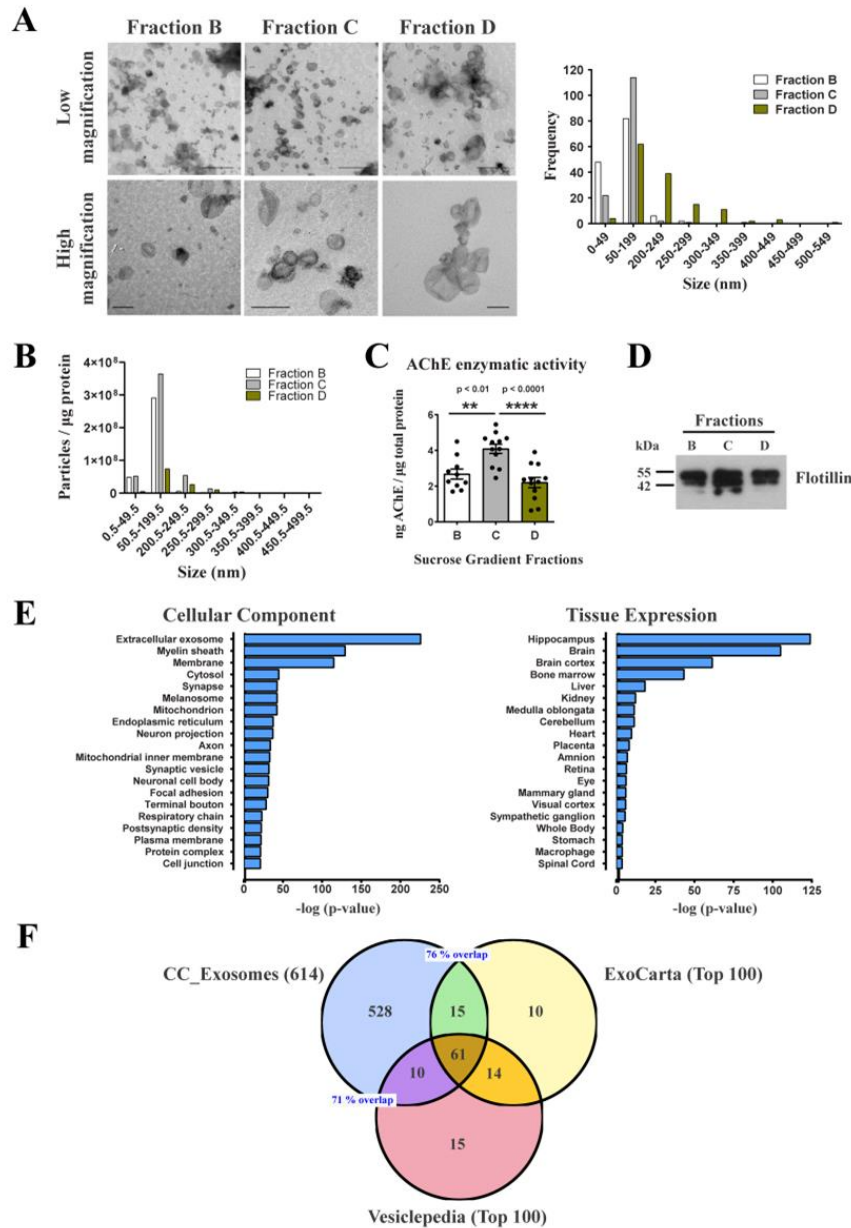

**Supplementary Figure 2. Characterization of the brain-derived ExE-EVs, following papain-based enzymatic homogenization, sequential centrifugations and sucrose gradient purification.** (A) Low (18,000x, scale bar 500  $\mu$ m) and high magnification (34,000x, scale bar 200  $\mu$ m, upper panel) EM images depicting the three sucrose gradient purified fractions, (B, C, and D) which are enriched in exosomes. Graph depicting the size distribution of extracellular vesicles isolated from the respective fractions. The x-axis represents the different size groups and the respective frequency is shown on the y-axis (lower panel). (B) Histogram illustrating the size distribution of the isolated brain-derived fractions, as measured by nanoparticle tracking analysis. y-axis represents the number of particles/ $\mu$ g of total protein of the different size groups shown along the x-axis. (C) Graph depicting the concentration of AChE enzyme (ng) contained in the isolated exosomal fractions normalized to the total protein content ( $\mu$ g) measured by Bradford assay. Data represent mean values  $\pm$  SEM. Differences were estimated using one-way ANOVA followed by Tukey's post-hoc test, \*\* $p < 0.01$ , and \*\*\* $p < 0.001$  ( $n = 10-12$  independent brain exosome preparations). (D) Representative Western immunoblot of the sucrose gradient purified fractions (B, C, D) against the exosome marker flotillin. (E) The brain-derived exosome-enriched fraction C was analyzed by nano LC-MS/MS, followed by DAVID platform analysis. Graphs depicting the cellular components (left) and the tissue specificity (right) along the y-axis and their statistical significance [-log ( $P$  value)] along the x-axis. Exosomes and brain tissue are the top hits following analysis with the DAVID platform. (F) Venn diagrams depicting numbers of the exosome-associated proteins identified in our preparations by DAVID in (blue), compared to the top 100 proteins of ExoCARTA (yellow) and Vesiclepedia (pink). The percentages indicate the overlap between the different data sets. ExE-EVs: Exosome Enriched Extracellular Vesicles, EM: Electron Microscopy, AChE: Acetylcholinesterase, nano LC-MS/MS: Nanoscale liquid chromatography coupled to tandem mass spectrometry.

# SUPPLEMENTARY DATA

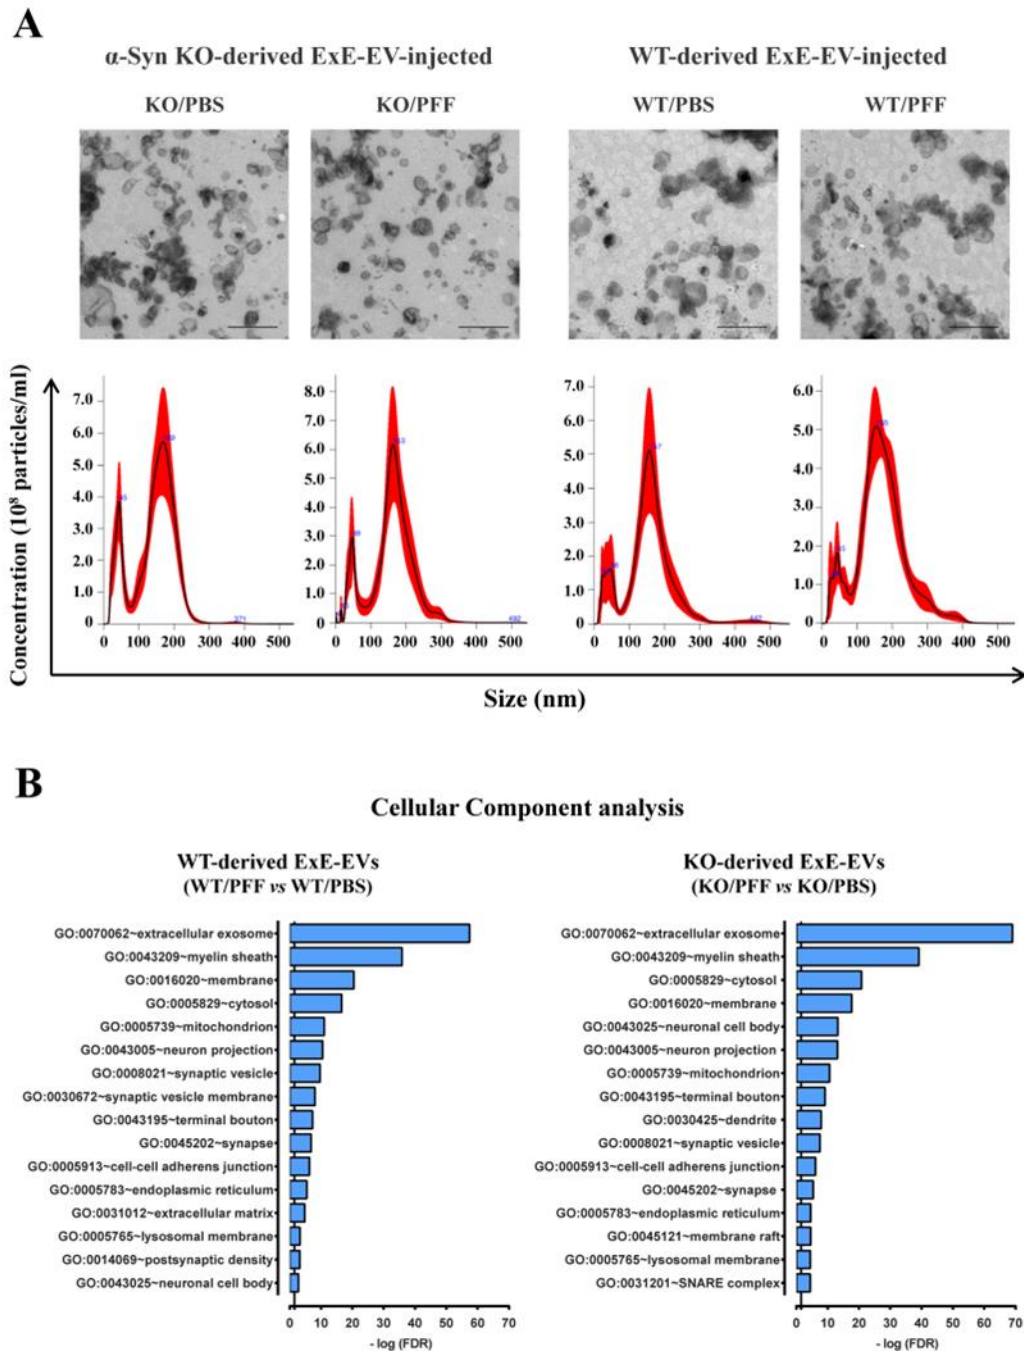

**Supplementary Figure 3. Characterization of the ExE-EVs isolated from PFF-injected WT and  $\alpha$ -Syn KO mouse brains, at one-month post-inoculation.** (A) Representative wide-field EM images of exosome-enriched fractions C isolated from the PFF-injected WT and  $\alpha$ -Syn KO mice and their respective PBS controls (scale bar 500 nm, upper panel). Representative curves of the size distribution of the isolated brain ExE-EVs from the 4 experimental groups, by nanoparticle tracking analysis (lower panel). (B) Cellular component analysis of the differentially altered proteins in the isolated brain ExE-EVs, following analysis with the DAVID platform. Graphs depicting the cellular components along the y-axis and their statistical significance [ $-\log(P \text{ value})$ ] along the x-axis, for ExE-EVs isolated from WT (left) and  $\alpha$ -Syn KO (right) brains. WT: wild type, KO: knockout.

# SUPPLEMENTARY DATA

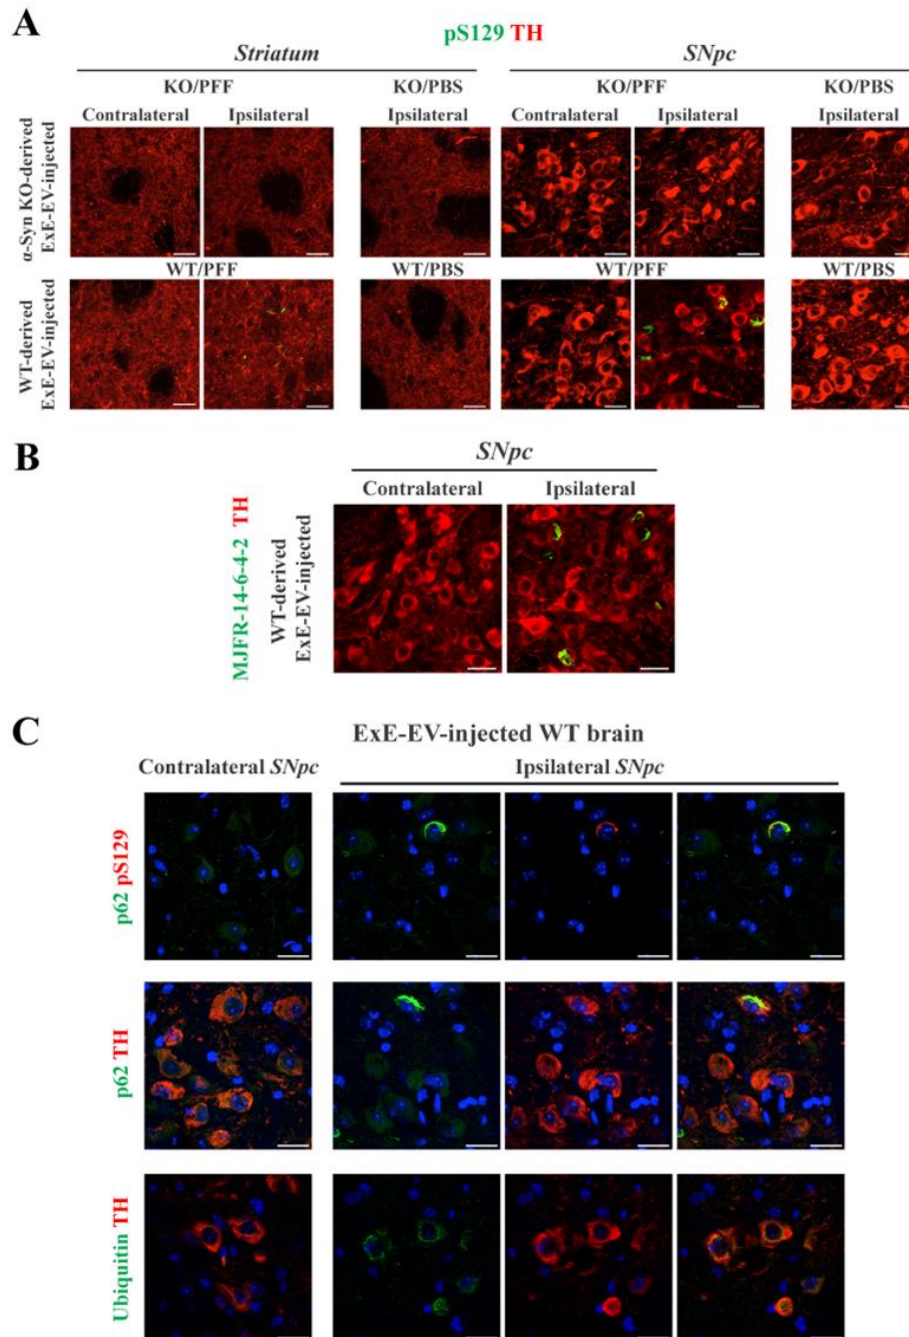

**Supplementary Figure 4. Inoculation of WT mice with higher dose of aberrant  $\alpha$ -Syn containing ExE-EVs triggers more robust pathology in the nigrostriatal route/axis at two-months post-injection.** WT mice were stereotactically injected with 15  $\mu$ g of brain-derived ExE-EVs in the right dorsal *striatum*. (A) Representative confocal images showing double immunostaining against phospho- $\alpha$ -Syn (green, pS129) and TH (red) in the contralateral and ipsilateral *striatum* (left panels) and *SNpc* (right panels) of ExE-EV-injected WT mice, [(63x, scale bar, 20  $\mu$ m)]. (B) Representative double immunostaining against the conformation-specific  $\alpha$ -Syn antibody MJFR-14-6-4-2 (green) and TH (red) in the *SNpc* of WT mice inoculated with WT/PFF-exosomes, showing the fibrillar nature of the  $\alpha$ -Syn accumulations within the TH neurons (63x, scale bar, 20  $\mu$ m). (C) Representative de-convolved confocal images depicting p62 or ubiquitin (green) accumulation within the TH (red) positive neurons and colocalization of accumulated p62 (green) and aggregated pS129 (5B9 clone, red) in the ipsilateral *SNpc* of WT/PFF-ExE-EV-injected WT mice (63x lens, scale bar 20  $\mu$ m). phospho- $\alpha$ -Syn: phosphorylated alpha-synuclein, TH: tyrosine hydroxylase, *SNpc*: *Substantia nigra pars compacta*.

# SUPPLEMENTARY DATA

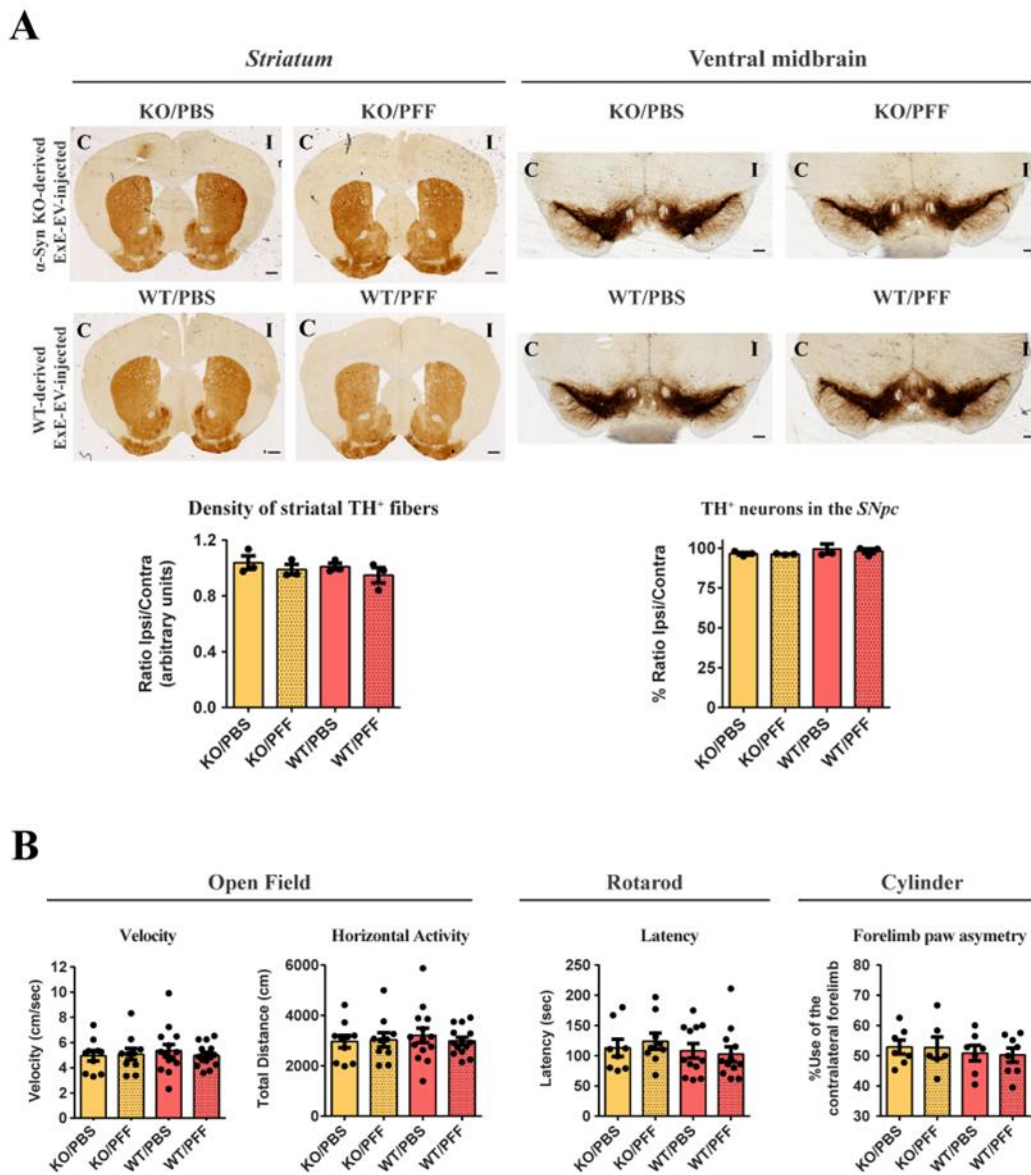

**Supplementary Figure 5. Inoculation with brain-derived ExE-EVs does not significantly affect either nigrostriatal integrity or behavioral parameters in WT host mice at two-months post-injections, irrespective of the ExE-EV background. (A)** Representative images of coronal striatal and nigral sections stained with anti-TH and obtained with the slide scanner (upper panels, scale bar 400  $\mu$ m). Graphs depicting the densitometric analysis of the TH positive striatal fibers, presented as the ratio of ipsilateral to contralateral side (lower panel, left) and stereological counts of the nigral dopaminergic cell somata, estimated as the percentage of TH positive neurons of the ipsilateral side versus the ones found in the contralateral side (lower panel, right) (n = 3 animals per group). Data represent mean values  $\pm$  SEM. Differences were estimated using Kruskal-Wallis followed by Dunn's test. **(B)** Brain ExE-EV-injected mice were subjected to open field, rotarod and cylinder tests, for assessment of their locomotor performance. Graphs depicting the mean velocity (cm/sec) and horizontal activity (total distance covered in cm) during open field test, the latency to fall during the rotarod test and the forelimb paw asymmetry, expressed as the percentage of use of the contralateral paw normalized to the ipsilateral, following cylinder test, are shown. Data represent mean values  $\pm$  SEM. Differences were estimated using one-way ANOVA followed by Tukey's post-hoc test. (n = 7-14 animals per group). C: contralateral side, I: ipsilateral side.

# SUPPLEMENTARY DATA

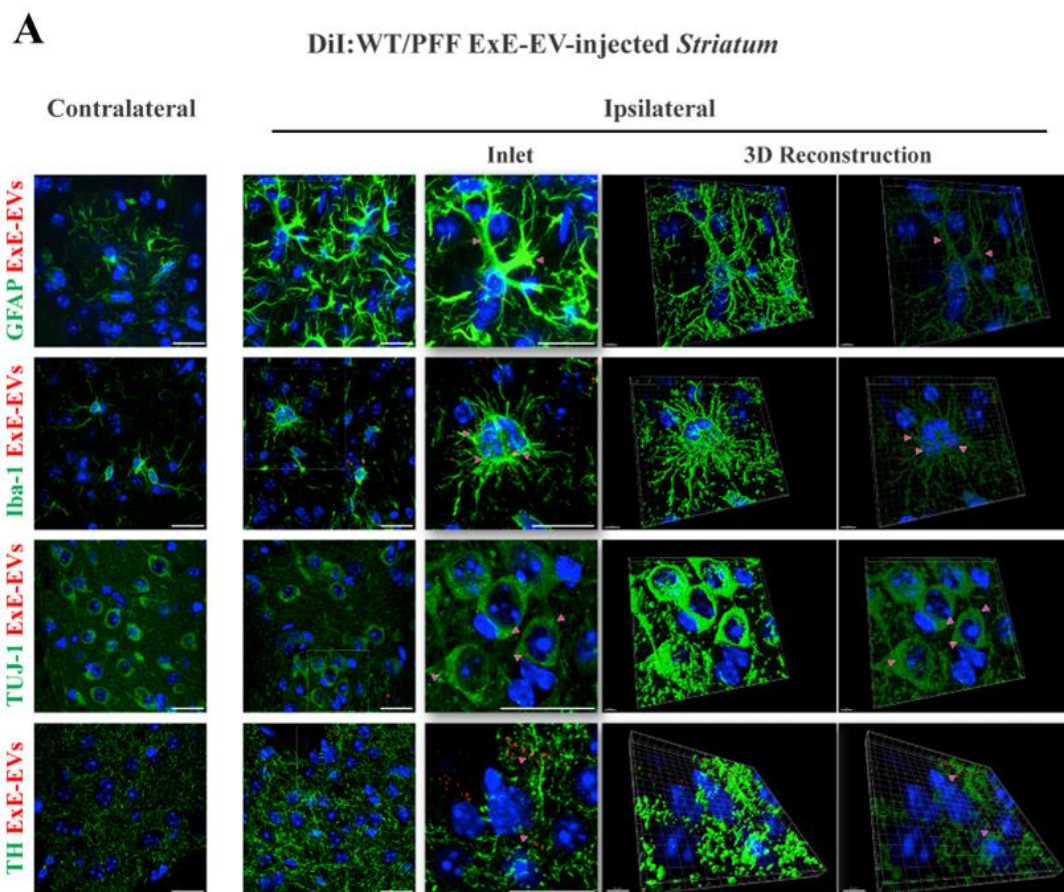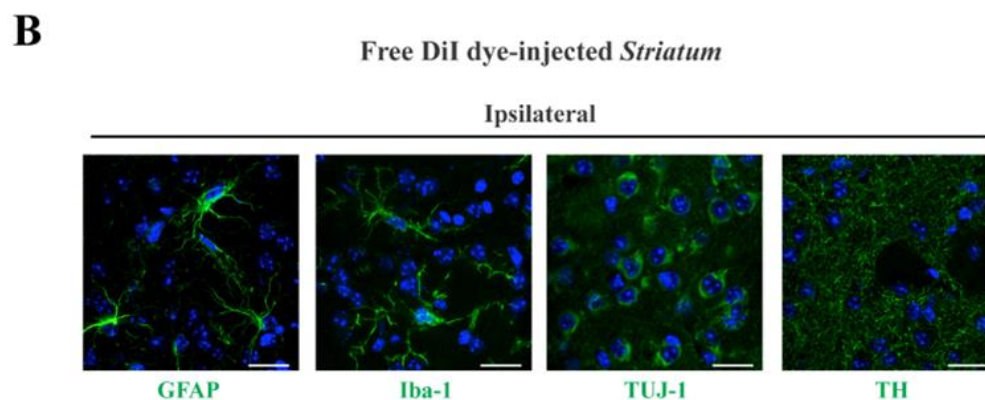

**Supplementary Figure 6. DiI-labelled WT/PFF ExE-EVs injected in the right dorsal *striatum* are internalized by neurons, microglia and astrocytes, two-weeks post-injection.** (A) Representative de-convolved confocal images showing the presence of DiI-labelled (red) WT/PFF ExE-EVs within astrocytes (GFAP, green), microglia (Iba-1, green), neurons (TUJ-1, green) and dopaminergic axons (TH, green) in the ipsilateral *striatum* of ExE-EV-injected WT mice [(63x, scale bar, 20  $\mu$ m)]. Injections were performed with 5.5  $\mu$ g of DiI-labelled WT/PFF ExE-EVs. The internalization of the injected ExE-EVs is further verified by 3D reconstruction via Imaris software, presented on the right panel [scale bar 5  $\mu$ m (GFAP, Iba-1, TH) and 3  $\mu$ m (TUJ-1)]. Arrows depict internalized ExE-EVs (B) Representative de-convolved confocal images. No free DiI dye was detected in any of the control-injected mice. DiI: 1,1'-Diocetadecyl-3,3',3'-Tetramethylindocarbocyanine Perchlorate (DiIC<sub>18</sub>(3)).

# SUPPLEMENTARY DATA

**Supplementary Table 1.** Identified proteins.

| C: Pfam                                                               | T: Protein IDs                                                                        | T: Protein names                                                                                                                                                  | T: Gene names |
|-----------------------------------------------------------------------|---------------------------------------------------------------------------------------|-------------------------------------------------------------------------------------------------------------------------------------------------------------------|---------------|
| GoLoco;Rap_GAP                                                        | A2ALS5;A2ALS5-2;A2ALS5-3;A2ALS5-4;Q5SVL6;Q5SVL6-2                                     | Rap1 GTPase-activating protein 1                                                                                                                                  | Rap1gap       |
| C2;EF-hand_7;EF-hand_like;PI-PLC-X;PI-PLC-Y                           | A2AP18;A2AP18-2;A2AP18-3;A2AP18-4;A2AP18-5;Q4KWH5;Q4KWH5-5;Q4KWH5-4;Q4KWH5-3;Q4KWH5-2 | 1-phosphatidylinositol 4,5-bisphosphate phosphodiesterase eta-2                                                                                                   | Plch2         |
| Dpy19                                                                 | A6X919;A6X919-2;P0CW70                                                                | Probable C-mannosyltransferase DPY19L1                                                                                                                            | Dpy19l1       |
| fn3;I-set;Y_phosphatase                                               | B0V2N1-4;B0V2N1-3;B0V2N1;B0V2N1-6;B0V2N1-2;B0V2N1-5                                   | Receptor-type tyrosine-protein phosphatase S                                                                                                                      | Ptprs         |
| DUF3451;Ion_trans;Na_trans_assoc                                      | B1AWN6;Q9ER60                                                                         | Sodium channel protein                                                                                                                                            | Scn2a1        |
| DOMON                                                                 | B1AXV0                                                                                | DOMON domain-containing protein FRRS1L                                                                                                                            | Frrs1l        |
| G-alpha                                                               | B2RSH2                                                                                | Guanine nucleotide-binding protein G(i) subunit alpha-1                                                                                                           | Gnai1         |
| Plexin_cytopl;PSI;Sema;TIG                                            | B2RXS4                                                                                | Plexin-B2                                                                                                                                                         | Plxnb2        |
| Carb_anhydrase;fn3;Y_phosphatase                                      | B9EKR1                                                                                | Receptor-type tyrosine-protein phosphatase zeta                                                                                                                   | Ptprz1        |
|                                                                       | C0HK80;C0HK79                                                                         |                                                                                                                                                                   |               |
| WSK                                                                   | D3YVF0                                                                                | A-kinase anchor protein 5                                                                                                                                         | Akap5         |
| Ank_2;Glutaminase                                                     | D3Z7P3;D3Z7P3-2                                                                       | Glutaminase kidney isoform, mitochondrial                                                                                                                         | Gls           |
| Dispanin                                                              | E9PUL5                                                                                | Proline-rich transmembrane protein 2                                                                                                                              | Prrt2         |
| PI3_PI4_kinase;PI3Ka                                                  | E9Q3L2                                                                                |                                                                                                                                                                   | Pi4ka         |
| Ins145_P3_rec;Ion_trans;MIR;RIH_assoc;RR_T M4-6;RYDR_ITPR;RyR;SPRY    | E9Q401;E9PZQ0;A2AGL3;A2AGL3-2                                                         | Ryanodine receptor 2                                                                                                                                              | Ryr2          |
|                                                                       | E9Q6P5                                                                                |                                                                                                                                                                   | Ttc7b         |
| Laminin_G_2;Syndecan                                                  | E9Q7X7                                                                                |                                                                                                                                                                   | Nrxn2         |
| Arm                                                                   | E9Q912;E9Q912-3                                                                       |                                                                                                                                                                   | Rap1gds1      |
| C2;DUF3498;RasGAP                                                     | F6SEU4                                                                                | Ras/Rap GTPase-activating protein SynGAP                                                                                                                          | Syngap1       |
| ATP_Ca_trans_C;Cation_ATPase_C;Cation_ATPase_N;E1-E2_ATPase;Hydrolase | G5E829                                                                                | Plasma membrane calcium-transporting ATPase 1                                                                                                                     | Atp2b1        |
| Calpain_III;Peptidase_C2                                              | O08529                                                                                | Calpain-2 catalytic subunit                                                                                                                                       | Capn2         |
| 7tm_1                                                                 | O08530                                                                                | Sphingosine 1-phosphate receptor 1                                                                                                                                | S1pr1         |
| Cache_1;VGCC_alpha2;VWA;VWA_N                                         | O08532-5;O08532-4;O08532;O08532-2;O08532-3                                            | Voltage-dependent calcium channel subunit alpha-2/delta-1; Voltage-dependent calcium channel subunit alpha-2-1; Voltage-dependent calcium channel subunit delta-1 | Cacna2d1      |
| BAR;SH3_9                                                             | O08539;O08539-2                                                                       | Myc box-dependent-interacting protein 1                                                                                                                           | Bin1          |
| Longin;Synaptobrevin                                                  | O08547                                                                                | Vesicle-trafficking protein SEC22b                                                                                                                                | Sec22b        |
| Amidohydro_1                                                          | O08553                                                                                | Dihydropyrimidinase-related protein 2                                                                                                                             | Dpysl2        |
| Clathrin_lg_ch                                                        | O08585                                                                                | Clathrin light chain A                                                                                                                                            | Clta          |
| Sec1                                                                  | O08599                                                                                | Syntaxin-binding protein 1                                                                                                                                        | Stxbp1        |
| Sec1                                                                  | O08599-2                                                                              | Syntaxin-binding protein 1                                                                                                                                        | Stxbp1        |



# SUPPLEMENTARY DATA

|                                          |                               |                                                                                                                                      |               |
|------------------------------------------|-------------------------------|--------------------------------------------------------------------------------------------------------------------------------------|---------------|
| C2;Calpain_III;Peptidase_C2              | O08688                        | Calpain-5                                                                                                                            | Capn5         |
| 1-cysPrx_C;AhpC-TSA                      | O08709                        | Peroxiredoxin-6                                                                                                                      | Prdx6         |
| Pyr_redox;Pyr_redox_2;Pyr_redox_dim      | O08749                        | Dihydrolipoyl dehydrogenase, mitochondrial                                                                                           | Dld           |
| CAP_GLY;Dynactin                         | O08788;O08788-2               | Dynactin subunit 1                                                                                                                   | Dctn1         |
| EF-hand_5;PRKCSH;PRKCSH-like             | O08795-2;O08795               | Glucosidase 2 subunit beta                                                                                                           | Prkesh        |
| 1-cysPrx_C;AhpC-TSA                      | O08807                        | Peroxiredoxin-4                                                                                                                      | Prdx4         |
| Band_7                                   | O08917                        | Flotillin-1                                                                                                                          | Flot1         |
| Ras                                      | O08989                        | Ras-related protein M-Ras                                                                                                            | Mras          |
| PDZ                                      | O08992                        | Syntenin-1                                                                                                                           | Sdcbp         |
| HMA                                      | O08997                        | Copper transport protein ATOX1                                                                                                       | Atox1         |
| Proteasome                               | O09061                        | Proteasome subunit beta type-1                                                                                                       | Psmb1         |
| ESSS                                     | O09111                        | NADH dehydrogenase [ubiquinone] 1 beta subcomplex subunit 11, mitochondrial                                                          | Ndufb11       |
| MARVEL                                   | O09117-2;O09117               | Synaptophysin-like protein 1                                                                                                         | Syp11         |
| MARVEL                                   | O09198-2;O09198               | Myelin and lymphocyte protein                                                                                                        | Mal           |
| Amidohydro_1                             | O35098;O35098-2               | Dihydropyrimidinase-related protein 4                                                                                                | Dpysl4        |
| CD36                                     | O35114                        | Lysosome membrane protein 2                                                                                                          | Scarb2        |
| Band_7                                   | O35129                        | Prohibitin-2                                                                                                                         | Phb2          |
| fn3;I-set                                | O35136;O35136-2               | Neural cell adhesion molecule 2                                                                                                      | Ncam2         |
| MIF                                      | O35215                        | D-dopachrome decarboxylase                                                                                                           | Ddt           |
| CRAL_TRIO;Y_phosphatase                  | O35239                        | Tyrosine-protein phosphatase non-receptor type 9                                                                                     | Ptpn9         |
| LRR_8                                    | O35381;Q64G17;Q9EST5;Q9EST5-2 | Acidic leucine-rich nuclear phosphoprotein 32 family member A;Putative acidic leucine-rich nuclear phosphoprotein 32 family member C | Anp32a;Anp32c |
|                                          | O35405                        | Phospholipase D3                                                                                                                     | Pld3          |
| PA;Peptidase_M28;TFR_dimer               | O35409                        | Glutamate carboxypeptidase 2                                                                                                         | Folh1         |
| EGF;F5_F8_type_C                         | O35474                        | EGF-like repeat and discoidin I-like domain-containing protein 3                                                                     | Edil3         |
| SNARE;Syntaxin                           | O35526;Q00262                 | Syntaxin-1A                                                                                                                          | Stx1a         |
| Tetraspannin                             | O35566                        | CD151 antigen                                                                                                                        | Cd151         |
| Disintegrin;Pep_M12B_propep              | O35598                        | Disintegrin and metalloproteinase domain-containing protein 10                                                                       | Adam10        |
| Patched                                  | O35604                        | Niemann-Pick C1 protein                                                                                                              | Npc1          |
| Aa_trans                                 | O35633;O35633-2               | Vesicular inhibitory amino acid transporter                                                                                          | Slc32a1       |
| Annexin                                  | O35639                        | Annexin A3                                                                                                                           | Anxa3         |
| Adaptin_N;Alpha_adaptinC2;B2-adapt-app_C | O35643                        | AP-1 complex subunit beta-1                                                                                                          | Ap1b1         |
| MAM33                                    | O35658                        | Complement component 1 Q subcomponent-binding protein, mitochondrial                                                                 | C1qbp         |

# SUPPLEMENTARY DATA

|                                                        |                                                     |                                                                                 |          |
|--------------------------------------------------------|-----------------------------------------------------|---------------------------------------------------------------------------------|----------|
| C2                                                     | O35681;Q9R0N9                                       | Synaptotagmin-3                                                                 | Syt3     |
| MARVEL                                                 | O35682                                              | Myeloid-associated differentiation marker                                       | Myadm    |
| Serpin                                                 | O35684                                              | Neuroserpin                                                                     | Serpini1 |
| CS;Nudc_N                                              | O35685                                              | Nuclear migration protein nudC                                                  | Nudc     |
| JAB                                                    | O35864                                              | COP9 signalosome complex subunit 5                                              | Cops5    |
| SDF                                                    | O35874                                              | Neutral amino acid transporter A                                                | Slc1a4   |
| EF-hand_7                                              | O35887                                              | Calumenin                                                                       | Calu     |
| DDOST_48kD                                             | O54734                                              | Dolichyl-diphosphooligosaccharide--protein glycosyltransferase 48 kDa subunit   | Ddost    |
| Adaptin_N;BLVR                                         | O54774                                              | AP-3 complex subunit delta-1                                                    | Ap3d1    |
| DEP;G-gamma;RGS                                        | O54829                                              | Regulator of G-protein signaling 7                                              | Rgs7     |
| Guanylate_cyc;HNOB;HNOBA                               | O54865                                              | Guanylate cyclase soluble subunit beta-1                                        | Gucy1b3  |
| ig                                                     | O54901                                              | OX-2 membrane glycoprotein                                                      | Cd200    |
| OCD_Mu_crystall                                        | O54983                                              | Ketimine reductase mu-crystallin                                                | Crym     |
| ArsA_ATPase                                            | O54984                                              | ATPase Asna1                                                                    | Asna1    |
| Prominin                                               | O54990;O54990-4;O54990-5;O54990-6;O54990-3;O54990-2 | Prominin-1                                                                      | Prom1    |
| F5_F8_type_C;Laminin_G_2                               | O54991                                              | Contactin-associated protein 1                                                  | Cntnap1  |
| Inositol_P                                             | O55023;P29218;P29218-3                              | Inositol monophosphatase 1                                                      | Impa1    |
| GDA1_CD39                                              | O55026;O55026-2                                     | Ectonucleoside triphosphate diphosphohydrolase 2                                | Entpd2   |
| Synuclein                                              | O55042;O55042-2                                     | Alpha-synuclein                                                                 | Snca     |
| AKAP7_NLS;AKAP7_RIRII_bdg                              | O55074;Q7TN79                                       | A-kinase anchor protein 7 isoform alpha;A-kinase anchor protein 7 isoform gamma | Akap7    |
| MARVEL                                                 | O55100;O55100-2                                     | Synaptogyrin-1                                                                  | Syng1    |
| NIPSNAP                                                | O55125                                              | Protein NipSnap homolog 1                                                       | Nipsnap1 |
| NIPSNAP                                                | O55126                                              | Protein NipSnap homolog 2                                                       | Gbas     |
| Septin                                                 | O55131;Q8C650;Q9DA97;Q8C650-2                       | Septin-7                                                                        | Septin7  |
| Cation_ATPase_C;Cation_ATPase_N;E1-E2_ATPase;Hydrolase | O55143;O55143-2;Q8R429                              | Sarcoplasmic/endoplasmic reticulum calcium ATPase 2                             | Atp2a2   |
| Proteasome                                             | O55234                                              | Proteasome subunit beta type-5                                                  | Psmb5    |
| ERG2_Sigma1R                                           | O55242;O55242-2                                     | Sigma non-opioid intracellular receptor 1                                       | Sigmar1  |
| Glycos_transf_2                                        | O70152                                              | Dolichol-phosphate mannosyltransferase subunit 1                                | Dpm1     |
| PIP5K                                                  | O70172                                              | Phosphatidylinositol 5-phosphate 4-kinase type-2 alpha                          | Pip4k2a  |
| E1-E2_ATPase;Hydrolase                                 | O70228;P98195;P98195-2                              | Probable phospholipid-transporting ATPase IIA                                   | Atp9a    |
| 4_1_CTD;FA;FERM_C;FERM_M;FERM_N;SAB                    | O70318                                              | Band 4.1-like protein 2                                                         | Epb4112  |
| GSHPx                                                  | O70325;O70325-2;O70325-3                            | Phospholipid hydroperoxide glutathione peroxidase, mitochondrial                | Gpx4     |
| UPF0172                                                | O70378                                              | ER membrane protein complex subunit 8                                           | Emc8     |

# SUPPLEMENTARY DATA

|                                     |                                                                                                               |                                                                                |           |
|-------------------------------------|---------------------------------------------------------------------------------------------------------------|--------------------------------------------------------------------------------|-----------|
| Proteasome;Proteasome_A_N           | O70435                                                                                                        | Proteasome subunit alpha type-3                                                | Psm3      |
| G-alpha                             | O70443                                                                                                        | Guanine nucleotide-binding protein G(z) subunit alpha                          | Gnaz      |
| adh_short                           | O70503                                                                                                        | Very-long-chain 3-oxoacyl-CoA reductase                                        | Hsd17b12  |
| Guanylate_kin;L27;PDZ;Pkinase;SH3_2 | O70589;O70589-3;O70589-4;O70589-5;O70589-2                                                                    | Peripheral plasma membrane protein CASK                                        | Cask      |
| fn3;Ldl_recept_a;Ldl_recept_b       | O88307                                                                                                        | Sortilin-related receptor                                                      | Sor11     |
| WD40                                | O88342                                                                                                        | WD repeat-containing protein 1                                                 | Wdr1      |
| Band_3_cyto;HCO3_cotransp           | O88343                                                                                                        | Electrogenic sodium bicarbonate cotransporter 1                                | Slc4a4    |
| V-SNARE                             | O88384                                                                                                        | Vesicle transport through interaction with t-SNAREs homolog 1B                 | Vti1b     |
| fn3;ig                              | O88507                                                                                                        | Ciliary neurotrophic factor receptor subunit alpha                             | Cntfr     |
| Palm_thioest                        | O88531                                                                                                        | Palmitoyl-protein thioesterase 1                                               | Ppt1      |
| RRM_1                               | O88569;O88569-3;O88569-2                                                                                      | Heterogeneous nuclear ribonucleoproteins A2/B1                                 | Hnrnpa2b1 |
| PBD;Pkinase                         | O88643                                                                                                        | Serine/threonine-protein kinase PAK 1                                          | Pak1      |
| cNMP_binding;Ion_trans;Ion_trans_N  | O88703;O88705                                                                                                 | Potassium/sodium hyperpolarization-activated cyclic nucleotide-gated channel 2 | Hcn2      |
| Iso_dh                              | O88844                                                                                                        | Isocitrate dehydrogenase [NADP] cytoplasmic                                    | Idh1      |
| Synapsin;Synapsin_C;Synapsin_N      | O88935;O88935-1;O88935-3                                                                                      | Synapsin-1                                                                     | Syn1      |
| L27;PDZ                             | O88952                                                                                                        | Protein lin-7 homolog C                                                        | Lin7c     |
| Glucosamine_iso                     | O88958                                                                                                        | Glucosamine-6-phosphate isomerase 1                                            | Gnpda1    |
| Noelin-1;OLF                        | O88998;O88998-3;O88998-2;O88998-4                                                                             | Noelin                                                                         | Olfm1     |
| Peptidase_M14                       | O89001                                                                                                        | Carboxypeptidase D                                                             | Cpd       |
| DUF1899;DUF1900;WD40                | O89053                                                                                                        | Coronin-1A                                                                     | Coro1a    |
| LANC_like                           | O89112                                                                                                        | LanC-like protein 1                                                            | Lanc11    |
| Cytochrom_B_C;Cytochrom_B_N_2       | P00158;Q7YC63                                                                                                 | Cytochrome b                                                                   | Mt-Cyb    |
| COX1                                | P00397;P41293                                                                                                 | Cytochrome c oxidase subunit 1                                                 | Mtco1     |
| COX2;COX2_TM                        | P00405;P41294                                                                                                 | Cytochrome c oxidase subunit 2                                                 | Mtco2     |
| Pribosyltran                        | P00493                                                                                                        | Hypoxanthine-guanine phosphoribosyltransferase                                 | Hprt1     |
| Carb_anhydrase                      | P00920                                                                                                        | Carbonic anhydrase 2                                                           | Ca2       |
| ig                                  | P01831                                                                                                        | Thy-1 membrane glycoprotein                                                    | Thy1      |
| Globin                              | P01942                                                                                                        | Hemoglobin subunit alpha                                                       | Hba       |
| Globin                              | P02088                                                                                                        | Hemoglobin subunit beta-1                                                      | Hbb-b1    |
| Oxidored_q1;Oxidored_q5_N           | P03911                                                                                                        | NADH-ubiquinone oxidoreductase chain 4                                         | Mtnd4     |
| NADH5_C;Oxidored_q1;Oxidored_q1_N   | P03921;P41299                                                                                                 | NADH-ubiquinone oxidoreductase chain 5                                         | Mtnd5     |
| Myelin_MBP                          | P04370-4;P04370-5;P04370-10;P04370-9;P04370-6;P04370-13;P04370-7;P04370-11;P04370;P04370-8;P04370-14;P04370-2 | Myelin basic protein                                                           | Mbp       |
| Prion;Prion_bPrPp                   | P04925                                                                                                        | Major prion protein                                                            | Prnp      |

# SUPPLEMENTARY DATA

|                                                    |                             |                                                                   |                     |
|----------------------------------------------------|-----------------------------|-------------------------------------------------------------------|---------------------|
| Glycolytic                                         | P05063                      | Fructose-bisphosphate aldolase C                                  | Aldoc               |
| Glycolytic                                         | P05064                      | Fructose-bisphosphate aldolase A                                  | Aldoa               |
| Pkinase                                            | P05132;P05132-2             | cAMP-dependent protein kinase catalytic subunit alpha             | Prkaca              |
| Aminotran_1_2                                      | P05201                      | Aspartate aminotransferase, cytoplasmic                           | Got1                |
| Aminotran_1_2                                      | P05202                      | Aspartate aminotransferase, mitochondrial                         | Got2                |
| Tubulin;Tubulin_C                                  | P05213                      | Tubulin alpha-1B chain                                            | Tuba1b              |
| Pkinase_Tyr;PSI;Sema;SH2;SH3_1;SH3_9;TIG           |                             |                                                                   |                     |
| FG-GAP;Integrin_alpha;Integrin_alpha2;VWA          | P05555-2;P05555             | Integrin alpha-M                                                  | Itgam               |
| Ldh_1_C;Ldh_1_N                                    | P06151;P00342               | L-lactate dehydrogenase A chain                                   | Ldha                |
| PGI                                                | P06745;CON__Q3ZBD7          | Glucose-6-phosphate isomerase                                     | Gpi                 |
| malic;Malic_M                                      | P06801                      | NADP-dependent malic enzyme                                       | Me1                 |
| IQ;Neuromodulin;Neuromodulin_N                     | P06837                      | Neuromodulin                                                      | Gap43               |
| FOLN;Kazal_1;SPARC_Ca_bdg                          | P07214                      | SPARC                                                             | Sparc               |
| Transthyretin                                      | P07309                      | Transthyretin                                                     | Ttr                 |
| Annexin                                            | P07356                      | Annexin A2                                                        | Anxa2               |
| Serum_albumin                                      | P07724                      | Serum albumin                                                     | Alb                 |
| Serpin                                             | Q00896;P07758               | Alpha-1-antitrypsin 1-3;Alpha-1-antitrypsin 1-1                   | Serpina1c;Serpina1a |
| Serpin                                             | P07759;Q03734               | Serine protease inhibitor A3K                                     | Serpina3k           |
| HATPase_c;HSP90                                    | P07901;REV__Q8BL66          | Heat shock protein HSP 90-alpha                                   | Hsp90aa1            |
| Thioredoxin                                        | P08003                      | Protein disulfide-isomerase A4                                    | Pdia4               |
| HSP90                                              | P08113                      | Endoplasmic                                                       | Hsp90b1             |
| Apolipoprotein                                     | P08226                      | Apolipoprotein E                                                  | ApoE                |
| Sod_Cu                                             | P08228                      | Superoxide dismutase [Cu-Zn]                                      | Sod1                |
| Ldh_1_C;Ldh_1_N                                    | P08249                      | Malate dehydrogenase, mitochondrial                               | Mdh2                |
| G-alpha                                            | P08752;P20612;P50149;Q3V3I2 | Guanine nucleotide-binding protein G(i) subunit alpha-2           | Gnai2               |
| EGF_2;Integrin_b_cyt;Integrin_B_tail;Integrin_beta | P09055;P09055-2             | Integrin beta-1                                                   | Itgb1               |
| Thioredoxin                                        | P09103                      | Protein disulfide-isomerase                                       | P4hb                |
| Alk_phosphatase                                    | P09242                      | Alkaline phosphatase, tissue-nonspecific isozyme                  | Alpl                |
| PGK                                                | P09411;P09041               | Phosphoglycerate kinase 1                                         | Pgk1                |
| Ferritin                                           | P09528                      | Ferritin heavy chain;Ferritin heavy chain, N-terminally processed | Fth1                |
| Sod_Fe_C;Sod_Fe_N                                  | P09671                      | Superoxide dismutase [Mn], mitochondrial                          | Sod2                |
| Snf7                                               | P0C0A3                      | Charged multivesicular body protein 6                             | Chmp6               |
| I-set;LRR_1;LRR_5;LRR_8;LRRNT                      | P0C192                      | Leucine-rich repeat-containing protein 4B                         | Lrrc4b              |
| Lectin_C                                           | P0C7M9                      | C-type lectin domain family 2 member L                            | Clec2l              |

# SUPPLEMENTARY DATA

|                                                         |                                                                                                |                                                                                                                                                                                                                                                                     |                      |
|---------------------------------------------------------|------------------------------------------------------------------------------------------------|---------------------------------------------------------------------------------------------------------------------------------------------------------------------------------------------------------------------------------------------------------------------|----------------------|
| Ribosomal_L40e;Ribosomal_S27;ubiquitin                  | P0CG50;P0CG49;P62983;P62984                                                                    | Polyubiquitin-C;Ubiquitin;Ubiquitin-related 1;Ubiquitin-related 2;Polyubiquitin-B;Ubiquitin;Ubiquitin-40S ribosomal protein S27a;Ubiquitin;40S ribosomal protein S27a;Ubiquitin-60S ribosomal protein L40;Ubiquitin;60S ribosomal protein L40                       | Ubc;Ubb;Rps27a;Uba52 |
| EF-hand_7                                               | P0DP28;P0DP27;P0DP26;Q9D6P8;P20801                                                             |                                                                                                                                                                                                                                                                     |                      |
|                                                         | P0DP60                                                                                         |                                                                                                                                                                                                                                                                     |                      |
| GTP_EFTU;GTP_EFTU_D2;GTP_EFTU_D3                        | P10126                                                                                         | Elongation factor 1-alpha 1                                                                                                                                                                                                                                         | Eef1a1               |
| Peptidase_C1;Propeptide_C1                              | P10605                                                                                         | Cathepsin B;Cathepsin B light chain;Cathepsin B heavy chain                                                                                                                                                                                                         | Ctsb                 |
| DEAD;Helicase_C                                         | P10630-2;P10630;P60843                                                                         | Eukaryotic initiation factor 4A-II;Eukaryotic initiation factor 4A-II, N-terminally processed;Eukaryotic initiation factor 4A-I                                                                                                                                     | Eif4a2;Eif4a1        |
| Tubulin-binding                                         | P10637-5;P10637;P10637-2;P10637-6;P10637-4;P10637-3                                            | Microtubule-associated protein tau                                                                                                                                                                                                                                  | Mapt                 |
| Thioredoxin                                             | P10639                                                                                         | Thioredoxin                                                                                                                                                                                                                                                         | Txn                  |
| GST_C;GST_N                                             | P10649;P19639;O35660                                                                           | Glutathione S-transferase Mu 1                                                                                                                                                                                                                                      | Gstm1                |
| Alpha-amylase                                           | P10852;P10852-2                                                                                | 4F2 cell-surface antigen heavy chain                                                                                                                                                                                                                                | Slc3a2               |
| PC4                                                     | P11031                                                                                         | Activated RNA polymerase II transcriptional coactivator p15                                                                                                                                                                                                         | Sub1                 |
| Lipocalin                                               | P11404                                                                                         | Fatty acid-binding protein, heart                                                                                                                                                                                                                                   | Fabp3                |
| Lamp                                                    | P11438                                                                                         | Lysosome-associated membrane glycoprotein 1                                                                                                                                                                                                                         | Lamp1                |
| HATPase_c;HSP90                                         | P11499                                                                                         | Heat shock protein HSP 90-beta                                                                                                                                                                                                                                      | Hsp90ab1             |
| Bravo_FIGEY;fn3;I-set                                   | P11627                                                                                         | Neural cell adhesion molecule L1                                                                                                                                                                                                                                    | L1cam                |
| CaMKII_AD;Pkinase                                       | P11798;P11798-2                                                                                | Calcium/calmodulin-dependent protein kinase type II subunit alpha                                                                                                                                                                                                   | Camk2a               |
| Ins145_P3_rec;Ion_trans;MIR;RIH_assoc;RYDR_ITPR         | P11881;P11881-2;P11881-8;P11881-7;P11881-6;P11881-5;P11881-4;P11881-3;Q9Z329;Q9Z329-2;Q9Z329-3 | Inositol 1,4,5-trisphosphate receptor type 1                                                                                                                                                                                                                        | Itrp1                |
| Cpn60_TCP1                                              | P11983;P11983-2                                                                                | T-complex protein 1 subunit alpha                                                                                                                                                                                                                                   | Tcp1                 |
| APP_amyloid;APP_Cu_bd;APP_E2;APP_N;Beta-APP;Kunitz_BPTI | P12023;P12023-2;P12023-3                                                                       | Amyloid beta A4 protein;N-APP;Soluble APP-alpha;Soluble APP-beta;C99;Beta-amyloid protein 42;Beta-amyloid protein 40;C83;P3(42);P3(40);C80;Gamma-secretase C-terminal fragment 59;Gamma-secretase C-terminal fragment 57;Gamma-secretase C-terminal fragment 50;C31 | App                  |
| cNMP_binding;RIIa                                       | P12367                                                                                         | cAMP-dependent protein kinase type II-alpha regulatory subunit                                                                                                                                                                                                      | Prkar2a              |
| PFK                                                     | P12382                                                                                         | ATP-dependent 6-phosphofructokinase, liver type                                                                                                                                                                                                                     | Pfkl                 |

# SUPPLEMENTARY DATA

|                                           |                                                        |                                                                                                     |        |
|-------------------------------------------|--------------------------------------------------------|-----------------------------------------------------------------------------------------------------|--------|
| EF-hand_6;EF-hand_7                       | P12658                                                 | Calbindin                                                                                           | Calb1  |
| COX5A                                     | P12787                                                 | Cytochrome c oxidase subunit 5A, mitochondrial                                                      | Cox5a  |
| EF-hand_1;EF-hand_6                       | P12815;P12815-2                                        | Programmed cell death protein 6                                                                     | Pcd6   |
| fn3;I-set                                 | P12960                                                 | Contactin-1                                                                                         | Cntn1  |
| fn3;I-set                                 | P13595;P13595-3;P13595-4                               | Neural cell adhesion molecule 1                                                                     | Ncam1  |
| NAD_Gly3P_dh_C;NAD_Gly3P_dh_N             | P13707                                                 | Glycerol-3-phosphate dehydrogenase [NAD(+)], cytoplasmic                                            | Gpd1   |
| Na_K-ATPase                               | P14094                                                 | Sodium/potassium-transporting ATPase subunit beta-1                                                 | Atp1b1 |
| C1q;Collagen                              | P14106                                                 | Complement C1q subcomponent subunit B                                                               | C1qb   |
| Ldh_1_C;Ldh_1_N                           | P14152                                                 | Malate dehydrogenase, cytoplasmic                                                                   | Mdh1   |
| Calreticulin                              | P14211                                                 | Calreticulin                                                                                        | Calr   |
| Na_K-ATPase                               | P14231                                                 | Sodium/potassium-transporting ATPase subunit beta-2                                                 | Atp1b2 |
| Annexin                                   | P14824                                                 | Annexin A6                                                                                          | Anxa6  |
| MAP1B_neuraxin                            | P14873                                                 | Microtubule-associated protein 1B;MAP1B heavy chain;MAP1 light chain LC1                            | Map1b  |
| Gln-synt_C;Gln-synt_N                     | P15105                                                 | Glutamine synthetase                                                                                | Glul   |
| Cadherin;Cadherin_C;Cadherin_pro          | P15116                                                 | Cadherin-2                                                                                          | Cdh2   |
| I-set;LRR_8;LRRNT;Pkinase_Tyr             | P15209;P15209-4;P15209-3;P15209-2                      | BDNF/NT-3 growth factors receptor                                                                   | Ntrk2  |
| NDK                                       | P15532                                                 | Nucleoside diphosphate kinase A                                                                     | Nme1   |
| Ldh_1_C;Ldh_1_N                           | P16125                                                 | L-lactate dehydrogenase B chain                                                                     | Ldhb   |
| CNPase                                    | P16330;P16330-2                                        | 2,3-cyclic-nucleotide 3-phosphodiesterase                                                           | Cnp    |
| BTB_2;Ion_trans                           | P16388;Q61923;B2RQA1                                   | Potassium voltage-gated channel subfamily A member 1                                                | Kcna1  |
| EF-hand_7;EFhand_Ca_insen;SH3_1;Spectrin  | P16546;P16546-2                                        | Spectrin alpha chain, non-erythrocytic 1                                                            | Sptan1 |
| HSP70                                     | P16627                                                 | Heat shock 70 kDa protein 1-like                                                                    | Hspa11 |
| Gp_dh_C;Gp_dh_N                           | P16858;Q64467                                          | Glyceraldehyde-3-phosphate dehydrogenase                                                            | Gapdh  |
| Lamp                                      | P17047;P17047-3;P17047-2                               | Lysosome-associated membrane glycoprotein 2                                                         | Lamp2  |
| Enolase_C;Enolase_N                       | P17182                                                 | Alpha-enolase                                                                                       | Eno1   |
| Enolase_C;Enolase_N                       | P17183                                                 | Gamma-enolase                                                                                       | Eno2   |
| Adaptin_N;Alpha_adaptin_C;Alpha_adaptinC2 | P17426;P17426-2                                        | AP-2 complex subunit alpha-1                                                                        | Ap2a1  |
| Adaptin_N;Alpha_adaptin_C;Alpha_adaptinC2 | P17427                                                 | AP-2 complex subunit alpha-2                                                                        | Ap2a2  |
| COX7C                                     | P17665                                                 | Cytochrome c oxidase subunit 7C, mitochondrial                                                      | Cox7c  |
| Hexokinase_1;Hexokinase_2                 | P17710;P17710-3;P17710-4;P17710-2;O08528;Q91W97;Q3TRM8 | Hexokinase-1                                                                                        | Hk1    |
| Pro_isomerase                             | P17742                                                 | Peptidyl-prolyl cis-trans isomerase A;Peptidyl-prolyl cis-trans isomerase A, N-terminally processed | Ppia   |
| TIM                                       | P17751;P17751-2                                        | Triosephosphate isomerase                                                                           | Tpi1   |

# SUPPLEMENTARY DATA

|                                                                                                         |                 |                                                                                                                                                                                                                                                                                                                                 |             |
|---------------------------------------------------------------------------------------------------------|-----------------|---------------------------------------------------------------------------------------------------------------------------------------------------------------------------------------------------------------------------------------------------------------------------------------------------------------------------------|-------------|
| Sugar_tr                                                                                                | P17809          | Solute carrier family 2, facilitated glucose transporter member 1                                                                                                                                                                                                                                                               | Slc2a1      |
| Y_phosphatase                                                                                           | P18052;P18052-2 | Receptor-type tyrosine-protein phosphatase alpha                                                                                                                                                                                                                                                                                | Ptpa        |
| A1_Propeptide;Asp                                                                                       | P18242          | Cathepsin D                                                                                                                                                                                                                                                                                                                     | Ctsd        |
| I-set                                                                                                   | P18572;P18572-2 | Basigin                                                                                                                                                                                                                                                                                                                         | Bsg         |
| Cofilin_ADF                                                                                             | P18760          | Cofilin-1                                                                                                                                                                                                                                                                                                                       | Cfl1        |
| G-alpha                                                                                                 | P18872          | Guanine nucleotide-binding protein G(o) subunit alpha                                                                                                                                                                                                                                                                           | Gnao1       |
| G-alpha                                                                                                 | P18872-2        | Guanine nucleotide-binding protein G(o) subunit alpha                                                                                                                                                                                                                                                                           | Gnao1       |
| Acyl_transf_1;ADH_zinc_N;ketoacyl-synt;Ketoacyl-synt_C;KR;Methyltransf_12;PP-binding;PS-DH;Thioesterase | P19096          | Fatty acid synthase;[Acyl-carrier-protein] S-acetyltransferase;[Acyl-carrier-protein] S-malonyltransferase;3-oxoacyl-[acyl-carrier-protein] synthase;3-oxoacyl-[acyl-carrier-protein] reductase;3-hydroxyacyl-[acyl-carrier-protein] dehydratase;Enoyl-[acyl-carrier-protein] reductase;Oleoyl-[acyl-carrier-protein] hydrolase | Fasn        |
| GST_C;GST_N                                                                                             | P19157;P46425   | Glutathione S-transferase P 1;Glutathione S-transferase P 2                                                                                                                                                                                                                                                                     | Gstp1;Gstp2 |
| COX5B                                                                                                   | P19536          | Cytochrome c oxidase subunit 5B, mitochondrial                                                                                                                                                                                                                                                                                  | Cox5b       |
| COX4                                                                                                    | P19783          | Cytochrome c oxidase subunit 4 isoform 1, mitochondrial                                                                                                                                                                                                                                                                         | Cox4i1      |
| HSP70                                                                                                   | P20029          | 78 kDa glucose-regulated protein                                                                                                                                                                                                                                                                                                | Hspa5       |
| Glyco_hydro_20;Glycohydro_20b2                                                                          | P20060          | Beta-hexosaminidase subunit beta                                                                                                                                                                                                                                                                                                | Hexb        |
| 1-cysPrx_C;AhpC-TSA                                                                                     | P20108          | Thioredoxin-dependent peroxide reductase, mitochondrial                                                                                                                                                                                                                                                                         | Prdx3       |
| Interfer-bind;Tissue_fac                                                                                | P20352          | Tissue factor                                                                                                                                                                                                                                                                                                                   | F3          |
| MAP2_projctn;Tubulin-binding                                                                            | P20357          | Microtubule-associated protein 2                                                                                                                                                                                                                                                                                                | Map2        |
| C1_1;C2;Pkinase;Pkinase_C                                                                               | P20444          | Protein kinase C alpha type                                                                                                                                                                                                                                                                                                     | Prkca       |
| C2-set_2;I-set                                                                                          | P20917;P20917-2 | Myelin-associated glycoprotein                                                                                                                                                                                                                                                                                                  | Mag         |
| Tropomyosin                                                                                             | P21107-2        | Tropomyosin alpha-3 chain                                                                                                                                                                                                                                                                                                       | Tpm3        |
| G-alpha                                                                                                 | P21278          | Guanine nucleotide-binding protein subunit alpha-11                                                                                                                                                                                                                                                                             | Gna11       |
| G-alpha                                                                                                 | P21279;P27600   | Guanine nucleotide-binding protein G(q) subunit alpha                                                                                                                                                                                                                                                                           | Gnaq        |
| ABC_membrane;ABC_tran                                                                                   | P21447          | Multidrug resistance protein 1A                                                                                                                                                                                                                                                                                                 | Abcb1a      |
| Cystatin                                                                                                | P21460          | Cystatin-C                                                                                                                                                                                                                                                                                                                      | Cst3        |
| P_proprotein;Peptidase_S8                                                                               | P21661          | Neuroendocrine convertase 2                                                                                                                                                                                                                                                                                                     | Pcsk2       |
| EGF;F5_F8_type_C;hEGF                                                                                   | P21956-2;P21956 | Lactadherin                                                                                                                                                                                                                                                                                                                     | Mfge8       |
| I-set                                                                                                   | P21995          | Embigin                                                                                                                                                                                                                                                                                                                         | Emb         |
| Neur_chan_LBD;Neur_chan_memb                                                                            | P22723;P22723-2 | Gamma-aminobutyric acid receptor subunit gamma-2                                                                                                                                                                                                                                                                                | Gabrg2      |
| Connexin;Connexin_CCC;Connexin43                                                                        | P23242          | Gap junction alpha-1 protein                                                                                                                                                                                                                                                                                                    | Gja1        |
| PCMT                                                                                                    | P23506;P23506-2 | Protein-L-isoaspartate(D-aspartate) O-methyltransferase                                                                                                                                                                                                                                                                         | Pcmt1       |

# SUPPLEMENTARY DATA

|                                       |                                   |                                                                            |                 |
|---------------------------------------|-----------------------------------|----------------------------------------------------------------------------|-----------------|
| ANF_receptor;Lig_chan;Lig_chan-Glu_bd | P23818                            | Glutamate receptor 1                                                       | Gria1           |
| ANF_receptor;Lig_chan;Lig_chan-Glu_bd | P23819-3;P23819-4;P23819;P23819-2 | Glutamate receptor 2                                                       | Gria2           |
| Crystallin;HSP20                      | P23927                            | Alpha-crystallin B chain                                                   | Cryab           |
| Catalase;Catalase-rel                 | P24270                            | Catalase                                                                   | Cat             |
| Aminotran_4                           | P24288                            | Branched-chain-amino-acid aminotransferase, cytosolic                      | Bcat1           |
| Pro_isomerase                         | P24369                            | Peptidyl-prolyl cis-trans isomerase B                                      | Ppib            |
| GST_C;GST_N                           | P24472                            | Glutathione S-transferase A4                                               | Gsta4           |
| Leuk-A4-hydro_C;Peptidase_M1          | P24527                            | Leukotriene A-4 hydrolase                                                  | Lta4h           |
| Aldedh                                | P24549;O35945                     | Retinal dehydrogenase 1;Aldehyde dehydrogenase, cytosolic 1                | Aldh1a1;Aldh1a7 |
| His_Phos_2                            | P24638                            | Lysosomal acid phosphatase                                                 | Acp2            |
| Man-6-P_recep                         | P24668                            | Cation-dependent mannose-6-phosphate receptor                              | M6pr            |
| ERM;FERM_C;FERM_M;FERM_N              | P26043;P26041                     | Radixin;Moesin                                                             | Rdx;Msn         |
| Neur_chan_LBD;Neur_chan_memb          | P26048                            | Gamma-aminobutyric acid receptor subunit alpha-2                           | Gabra2          |
| Neur_chan_LBD;Neur_chan_memb          | P26049                            | Gamma-aminobutyric acid receptor subunit alpha-3                           | Gabra3          |
| Prothymosin                           | P26350                            | Prothymosin alpha;Prothymosin alpha, N-terminally processed;Thymosin alpha | Ptma            |
| ELFV_dehydrog;ELFV_dehydrog_N         | P26443                            | Glutamate dehydrogenase 1, mitochondrial                                   | Glud1           |
| Seryl_tRNA_N;tRNA-synt_2b             | P26638                            | Serine--tRNA ligase, cytoplasmic                                           | Sars            |
| MARCKS                                | P26645                            | Myristoylated alanine-rich C-kinase substrate                              | Marcks          |
| FKBP_C                                | P26883                            | Peptidyl-prolyl cis-trans isomerase FKBP1A                                 | Fkbp1a          |
| G-alpha                               | P27601                            | Guanine nucleotide-binding protein subunit alpha-13                        | Gna13           |
| Thioredoxin                           | P27773                            | Protein disulfide-isomerase A3                                             | Pdia3           |
| ADH_N;ADH_zinc_N                      | P28474;Q64437                     | Alcohol dehydrogenase class-3                                              | Adh5            |
| SNF                                   | P28571-1;P28571;P28571-2          | Sodium- and chloride-dependent glycine transporter 1                       | Slc6a9          |
| CaMKII_AD;Pkinase                     | P28652                            | Calcium/calmodulin-dependent protein kinase type II subunit beta           | Camk2b          |
| NAP                                   | P28656                            | Nucleosome assembly protein 1-like 1                                       | Nap111          |
| Nckap1                                | P28660;P28660-2                   | Nck-associated protein 1                                                   | Nckap1          |
|                                       | P28663                            | Beta-soluble NSF attachment protein                                        | Napb            |
| Kinesin                               | P28738;P33175                     | Kinesin heavy chain isoform 5C;Kinesin heavy chain isoform 5A              | Kif5c;Kif5a     |
| WD40                                  | P29387                            | Guanine nucleotide-binding protein subunit beta-4                          | Gnb4            |
| Ferritin                              | P29391;P49945                     | Ferritin light chain 1;Ferritin light chain 2                              | Ftl1;Ftl2       |
| C2-set;I-set                          | P29533;P29533-2                   | Vascular cell adhesion protein 1                                           | Vcam1           |
| ATP-gua_Ptrans;ATP-gua_PtransN        | P30275;Q6P8J7                     | Creatine kinase U-type, mitochondrial                                      | Ckmt1           |



# SUPPLEMENTARY DATA

|                                              |                        |                                                                   |          |
|----------------------------------------------|------------------------|-------------------------------------------------------------------|----------|
| cNMP_binding;RIIa                            | P31324                 | cAMP-dependent protein kinase type II-beta regulatory subunit     | Prkar2b  |
| SNF                                          | P31648                 | Sodium- and chloride-dependent GABA transporter 1                 | Slc6a1   |
| SNF                                          | P31650                 | Sodium- and chloride-dependent GABA transporter 3                 | Slc6a11  |
| ACBP                                         | P31786                 | Acyl-CoA-binding protein                                          | Dbi      |
| Pkinase                                      | P31938;Q63932          | Dual specificity mitogen-activated protein kinase kinase 1        | Map2k1   |
| Sugar_tr                                     | P32037                 | Solute carrier family 2, facilitated glucose transporter member 3 | Slc2a3   |
| EF-hand_7                                    | P32848                 | Parvalbumin alpha                                                 | Pvalb    |
| Ras                                          | P32883-2;P32883;P01117 | GTPase KRas;GTPase KRas, N-terminally processed                   | Kras     |
| tRNA-synt_1b;WHEP-TRS                        | P32921;P32921-2        | Tryptophan--tRNA ligase, cytoplasmic;T1-TrpRS;T2-TrpRS            | Wars     |
| Ran_BP1                                      | P34022                 | Ran-specific GTPase-activating protein                            | Ranbp1   |
| MIF                                          | P34884                 | Macrophage migration inhibitory factor                            | Mif      |
| SH2;Y_phosphatase                            | P35235;P35235-1        | Tyrosine-protein phosphatase non-receptor type 11                 | Ptpn11   |
| Ras                                          | P35278                 | Ras-related protein Rab-5C                                        | Rab5c    |
| Ras                                          | P35279;P35279-2        | Ras-related protein Rab-6A                                        | Rab6a    |
| Ras                                          | P35282                 | Ras-related protein Rab-21                                        | Rab21    |
| Ras                                          | P35293                 | Ras-related protein Rab-18                                        | Rab18    |
| ANF_receptor;Lig_chan;NMDAR2_C               | P35436                 | Glutamate receptor ionotropic, NMDA 2A                            | Grin2a   |
| ANF_receptor;CaM_bdg_C0;Lig_chan             | P35438;P35438-2        | Glutamate receptor ionotropic, NMDA 1                             | Grin1    |
| Calreticulin                                 | P35564                 | Calnexin                                                          | Canx     |
| 1-cysPrx_C;AhpC-TSA                          | P35700                 | Peroxiredoxin-1                                                   | Prdx1    |
| Tetraspannin                                 | P35762                 | CD81 antigen                                                      | Cd81     |
| Myelin_PLP                                   | P35802                 | Neuronal membrane glycoprotein M6-a                               | Gpm6a    |
| Myelin_PLP                                   | P35803-4;P35803-5      | Neuronal membrane glycoprotein M6-b                               | Gpm6b    |
| Myelin_PLP                                   | P35803-8;P35803-3      | Neuronal membrane glycoprotein M6-b                               | Gpm6b    |
| Coprogen_oxidas                              | P36552                 | Oxygen-dependent coproporphyrinogen-III oxidase, mitochondrial    | Cpox     |
| HSP70                                        | P38647                 | Stress-70 protein, mitochondrial                                  | Hspa9    |
| Dynamin_M;GED;PH                             | P39053-3               | Dynamin-1                                                         | Dnm1     |
| ANF_receptor;Lig_chan;Lig_chan-Glu_bd        | P39087;P39087-2        | Glutamate receptor ionotropic, kainate 2                          | Grik2    |
| Pkinase_Tyr;SH2;SH3_1                        | P39688;P39688-2;Q04736 | Tyrosine-protein kinase Fyn;Tyrosine-protein kinase Yes           | Fyn;Yes1 |
| CAP_C;CAP_N                                  | P40124                 | Adenylyl cyclase-associated protein 1                             | Cap1     |
| Transket_pyr;Transketolase_C;Transketolase_N | P40142                 | Transketolase                                                     | Tkt      |
| Tetraspannin                                 | P40237                 | CD82 antigen                                                      | Cd82     |

# SUPPLEMENTARY DATA

|                                       |                             |                                                                                                               |               |
|---------------------------------------|-----------------------------|---------------------------------------------------------------------------------------------------------------|---------------|
| Tetraspannin                          | P40240                      | CD9 antigen                                                                                                   | Cd9           |
| Septin                                | P42208                      | Septin-2                                                                                                      | Σεπ-02        |
| PurA                                  | P42669                      | Transcriptional activator protein Pur-alpha                                                                   | Pura          |
| Cpn60_TCP1                            | P42932                      | T-complex protein 1 subunit theta                                                                             | Cct8          |
| SDF                                   | P43006;P43006-2;P43006-3    | Excitatory amino acid transporter 2                                                                           | Slc1a2        |
| COX6A                                 | P43024                      | Cytochrome c oxidase subunit 6A1, mitochondrial                                                               | Cox6a1        |
| FG-GAP;Integrin_alpha;Integrin_alpha2 | P43406                      | Integrin alpha-V;Integrin alpha-V heavy chain;Integrin alpha-V light chain                                    | Itgav         |
| Aldo_ket_red                          | P45376                      | Aldose reductase                                                                                              | Akr1b1        |
| Cofilin_ADF                           | P45591                      | Cofilin-2                                                                                                     | Cfl2          |
| FKBP_C                                | P45878                      | Peptidyl-prolyl cis-trans isomerase FKBP2                                                                     | Fkbp2         |
| C2                                    | P46096                      | Synaptotagmin-1                                                                                               | Syt1          |
| C2                                    | P46097                      | Synaptotagmin-2                                                                                               | Syt2          |
| AAA;CDC48_2;CDC48_N;HMG_box           | P46460;O54941               | Vesicle-fusing ATPase                                                                                         | Nsf           |
| Ras                                   | P46638;P62492;Q9WTL2        | Ras-related protein Rab-11B;Ras-related protein Rab-11A                                                       | Rab11b;Rab11a |
| Adenylsucc_synt                       | P46664                      | Adenylosuccinate synthetase isozyme 2                                                                         | Adss          |
| STT3                                  | P46978                      | Dolichyl-diphosphooligosaccharide--protein glycosyltransferase subunit STT3A                                  | Stt3a         |
| C2                                    | P47708;P70169               | Rabphilin-3A                                                                                                  | Rph3a         |
| Aldedh                                | P47738;Q9CZS1;Q62148;Q9JHW9 | Aldehyde dehydrogenase, mitochondrial                                                                         | Aldh2         |
| Aldedh                                | P47740;P47739               | Fatty aldehyde dehydrogenase                                                                                  | Aldh3a2       |
| 7tm_1                                 | P47746                      | Cannabinoid receptor 1                                                                                        | Cnr1          |
| F-actin_cap_A                         | P47754;P47753               | F-actin-capping protein subunit alpha-2                                                                       | Capza2        |
| F_actin_cap_B                         | P47757-4;P47757-2;P47757    | F-actin-capping protein subunit beta                                                                          | Capzb         |
| PFK                                   | P47857;P47857-2;P47857-3    | ATP-dependent 6-phosphofructokinase, muscle type                                                              | Pfkm          |
| Annexin                               | P48036                      | Annexin A5                                                                                                    | Anxa5         |
| Pyridoxal_deC                         | P48318                      | Glutamate decarboxylase 1                                                                                     | Gad1          |
| Pyridoxal_deC                         | P48320                      | Glutamate decarboxylase 2                                                                                     | Gad2          |
| HSP70                                 | P48722;P48722-2             | Heat shock 70 kDa protein 4L                                                                                  | Hspa4l        |
| adh_short                             | P48758                      | Carbonyl reductase [NADPH] 1                                                                                  | Cbr1          |
| COX7a                                 | P48771                      | Cytochrome c oxidase subunit 7A2, mitochondrial                                                               | Cox7a2        |
| GST_C;GST_N                           | P48774                      | Glutathione S-transferase Mu 5                                                                                | Gstm5         |
| Mito_carr                             | P48962;Q3V132               | ADP/ATP translocase 1                                                                                         | Slc25a4       |
| HnRNPA1;RRM_1                         | P49312;P49312-2             | Heterogeneous nuclear ribonucleoprotein A1;Heterogeneous nuclear ribonucleoprotein A1, N-terminally processed | Hnrnpa1       |

# SUPPLEMENTARY DATA

|                                           |                                            |                                                                                                    |          |
|-------------------------------------------|--------------------------------------------|----------------------------------------------------------------------------------------------------|----------|
| Inositol_P                                | P49442                                     | Inositol polyphosphate 1-phosphatase                                                               | Inpp1    |
| Pkinase                                   |                                            |                                                                                                    |          |
| Proteasome;Proteasome_A_N                 | P49722                                     | Proteasome subunit alpha type-2                                                                    | Psma2    |
| S_100                                     | P50114                                     | Protein S100-B                                                                                     | S100b    |
| adh_short                                 | P50172                                     | Corticosteroid 11-beta-dehydrogenase isozyme 1                                                     | Hsd11b1  |
| AdoHcyase;AdoHcyase_NAD                   | P50247                                     | Adenosylhomocysteinase                                                                             | Ahcy     |
| GDI                                       | P50396                                     | Rab GDP dissociation inhibitor alpha                                                               | Gdi1     |
| ATP-synt_ab;ATP-synt_ab_C;ATP-synt_ab_N   | P50516;P50516-2                            | V-type proton ATPase catalytic subunit A                                                           | Atp6v1a  |
| vATP-synt_E                               | P50518;Q9D593                              | V-type proton ATPase subunit E 1                                                                   | Atp6v1e1 |
| Neur_chan_LBD;Neur_chan_memb              | P50571                                     | Gamma-aminobutyric acid receptor subunit beta-1                                                    | Gabbr1   |
| Ras                                       | P51150                                     | Ras-related protein Rab-7a                                                                         | Rab7a    |
| Acyl-CoA_dh_1;Acyl-CoA_dh_M;Acyl-CoA_dh_N | P51174                                     | Long-chain specific acyl-CoA dehydrogenase, mitochondrial                                          | Acadl    |
| adh_short;MaoC_dehydratas;SCP2            | P51660                                     | Peroxisomal multifunctional enzyme type 2;(3R)-hydroxyacyl-CoA dehydrogenase;Enoyl-CoA hydratase 2 | Hsd17b4  |
| CBS;Voltage_CLC                           | P51791;P51791-2;P51791-4;P51791-5;P51791-3 | H(+)/Cl(-) exchange transporter 3                                                                  | Clcn3    |
| Guanylate_cyc                             | P51830                                     | Adenylate cyclase type 9                                                                           | Adcy9    |
| vATP-synt_AC39                            | P51863                                     | V-type proton ATPase subunit d 1                                                                   | Atp6v0d1 |
| Mito_carr                                 | P51881                                     | ADP/ATP translocase 2;ADP/ATP translocase 2, N-terminally processed                                | Slc25a5  |
| SDF                                       | P51906                                     | Excitatory amino acid transporter 3                                                                | Slc1a1   |
| Lipopalin_2                               | P51910                                     | Apolipoprotein D                                                                                   | Apod     |
| PK;PK_C                                   | P52480-2                                   | Pyruvate kinase PKM                                                                                | Pkm      |
| zf-CHCC                                   | P52503                                     | NADH dehydrogenase [ubiquinone] iron-sulfur protein 6, mitochondrial                               | Ndufs6   |
| Ribonuc_L-PSP                             | P52760                                     | Ribonuclease UK114                                                                                 | Hrsp12   |
| Ribosomal_L1                              | P53026                                     | 60S ribosomal protein L10a                                                                         | Rpl10a   |
| IP_trans                                  | P53810                                     | Phosphatidylinositol transfer protein alpha isoform                                                | Pitpna   |
| IP_trans                                  | P53811                                     | Phosphatidylinositol transfer protein beta isoform                                                 | Pitpnb   |
| MFS_1                                     | P53986                                     | Monocarboxylate transporter 1                                                                      | Slc16a1  |
| Ras                                       | P53994                                     | Ras-related protein Rab-2A                                                                         | Rab2a    |
| Iso_dh                                    | P54071                                     | Isocitrate dehydrogenase [NADP], mitochondrial                                                     | Idh2     |
| Stathmin                                  | P54227                                     | Stathmin                                                                                           | Stmn1    |
| UBA;ubiquitin;XPC-binding                 | P54728;P54726                              | UV excision repair protein RAD23 homolog B                                                         | Rad23b   |
| AA_permease;AA_permease_N                 | P55012                                     | Solute carrier family 12 member 2                                                                  | Slc12a2  |
| Lectin_C;Sushi;V-set;Xlink                | P55066                                     | Neurocan core protein                                                                              | Ncan     |

# SUPPLEMENTARY DATA

|                                          |                                        |                                                                                   |                |
|------------------------------------------|----------------------------------------|-----------------------------------------------------------------------------------|----------------|
| MIP                                      | P55088;P55088-3;P55088-2               | Aquaporin-4                                                                       | Aqp4           |
| Alpha-2-MRAP_C;Alpha-2-MRAP_N            | P55302                                 | Alpha-2-macroglobulin receptor-associated protein                                 | Lrpap1         |
| WRW                                      | P56135                                 | ATP synthase subunit f, mitochondrial                                             | Atp5j2         |
| Acylphosphatase                          | P56376                                 | Acylphosphatase-1                                                                 | Acyp1          |
| COX6B                                    | P56391                                 | Cytochrome c oxidase subunit 6B1                                                  | Cox6b1         |
| UBA;UCH;zf-UBP                           | P56399                                 | Ubiquitin carboxyl-terminal hydrolase 5                                           | Usp5           |
| ATP-synt_ab;ATP-synt_ab_C;ATP-synt_ab_N  | P56480                                 | ATP synthase subunit beta, mitochondrial                                          | Atp5b          |
| SDF                                      | P56564;O35544                          | Excitatory amino acid transporter 1                                               | Slc1a3         |
|                                          | P56695                                 | Wolframin                                                                         | Wfs1           |
| Asp                                      | P56818                                 | Beta-secretase 1                                                                  | Bace1          |
| Nicastrin                                | P57716                                 | Nicastrin                                                                         | Ncstn          |
| ATP-synt_D                               | P57746                                 | V-type proton ATPase subunit D                                                    | Atp6v1d        |
| ERp29;ERp29_N                            | P57759                                 | Endoplasmic reticulum resident protein 29                                         | Erp29          |
| EMP70                                    | P58021                                 | Transmembrane 9 superfamily member 2                                              | Tm9sf2         |
| Metallophos                              | P58242                                 | Acid sphingomyelinase-like phosphodiesterase 3b                                   | Smpdl3b        |
| EFG_C;EFG_II;EFG_IV;GTP_EFTU;GTP_EFTU_D2 | P58252;O08810                          | Elongation factor 2                                                               | Eef2           |
|                                          | P58281;P58281-2                        | Dynamin-like 120 kDa protein, mitochondrial;Dynamin-like 120 kDa protein, form S1 | Opa1           |
| PTPA                                     | P58389                                 | Serine/threonine-protein phosphatase 2A activator                                 | Ppp2r4         |
| C2;Copine                                | P59108                                 | Copine-2                                                                          | Cpne2          |
| Lectin_leg-like                          | P59481                                 | VIP36-like protein                                                                | Lman2l         |
| ARPC4                                    | P59999                                 | Actin-related protein 2/3 complex subunit 4                                       | Arpc4          |
| Myelin_PLP                               | P60202;P60202-2                        | Myelin proteolipid protein                                                        | Plp1           |
| KH_1                                     | P60335;P57722;P57722-2                 | Poly(rC)-binding protein 1                                                        | Pcbp1          |
| Hydrolase_6                              | P60487                                 | Pyridoxal phosphate phosphatase                                                   | Pdpxp          |
| Ras                                      | P60766;P60766-1;Q8R527;Q9ER71;Q9ER71-2 | Cell division control protein 42 homolog                                          | Cdc42          |
| SNAP-25;SNARE                            | P60879;O09044                          | Synaptosomal-associated protein 25                                                | Snap25         |
| SNAP-25;SNARE                            | P60879-2                               | Synaptosomal-associated protein 25                                                | Snap25         |
| DnaJ                                     | P60904                                 | DnaJ homolog subfamily C member 5                                                 | Dnajc5         |
| Ras                                      | P61021                                 | Ras-related protein Rab-5B                                                        | Rab5b          |
| Ras                                      | P61027                                 | Ras-related protein Rab-10                                                        | Rab10          |
| UQ_con                                   | P61089                                 | Ubiquitin-conjugating enzyme E2 N                                                 | Ube2n          |
| Actin                                    | P61161                                 | Actin-related protein 2                                                           | Actr2          |
| Arf                                      | P61205;P84078;Q8BSL7                   | ADP-ribosylation factor 3;ADP-ribosylation factor 1;ADP-ribosylation factor 2     | Arf3;Arf1;Arf2 |
| Ras                                      | P61226                                 | Ras-related protein Rap-2b                                                        | Rap2b          |

# SUPPLEMENTARY DATA

|                                         |                                               |                                                                                                                                                                                                   |                      |
|-----------------------------------------|-----------------------------------------------|---------------------------------------------------------------------------------------------------------------------------------------------------------------------------------------------------|----------------------|
| SNARE;Syntaxin                          | P61264                                        | Syntaxin-1B                                                                                                                                                                                       | Stx1b                |
| Ras                                     | P61294                                        | Ras-related protein Rab-6B                                                                                                                                                                        | Rab6b                |
| DAD                                     | P61804                                        | Dolichyl-diphosphooligosaccharide--protein glycosyltransferase subunit DAD1                                                                                                                       | Dad1                 |
| Aminotran_3                             | P61922;P61922-2                               | 4-aminobutyrate aminotransferase, mitochondrial                                                                                                                                                   | Abat                 |
| NTF2                                    | P61971                                        | Nuclear transport factor 2                                                                                                                                                                        | Nutf2                |
| KH_1;ROKNT                              | P61979;P61979-2;P61979-3                      | Heterogeneous nuclear ribonucleoprotein K                                                                                                                                                         | Hnrnpk               |
| 14/3/2003                               | P61982                                        | 14-3-3 protein gamma;14-3-3 protein gamma, N-terminally processed                                                                                                                                 | Ywhag                |
| Ras                                     | P62071;P10833                                 | Ras-related protein R-Ras2;Ras-related protein R-Ras                                                                                                                                              | Rras2;Rras           |
| zf-Tim10_DDP                            | P62075                                        | Mitochondrial import inner membrane translocase subunit Tim13                                                                                                                                     | Timm13               |
| Metallophos                             | P62141;P62137;P63087;P63088;P63088-2;P63087-2 | Serine/threonine-protein phosphatase PP1-beta catalytic subunit;Serine/threonine-protein phosphatase PP1-alpha catalytic subunit;Serine/threonine-protein phosphatase PP1-gamma catalytic subunit | Ppp1cb;Ppp1ca;Ppp1cc |
| 14/3/2003                               | P62259                                        | 14-3-3 protein epsilon                                                                                                                                                                            | Ywhae                |
| Arf                                     | P62331                                        | ADP-ribosylation factor 6                                                                                                                                                                         | Arf6                 |
| Rdx                                     | P62342                                        | Selenoprotein T                                                                                                                                                                                   | Selt                 |
| Aldo_ket_red                            | P62482                                        | Voltage-gated potassium channel subunit beta-2                                                                                                                                                    | Kcnab2               |
| Abi_HHR;SH3_9                           | P62484                                        | Abl interactor 2                                                                                                                                                                                  | Abi2                 |
| GTP_EFTU;GTP_EFTU_D2;GTP_EFTU_D3        | P62631                                        | Elongation factor 1-alpha 2                                                                                                                                                                       | Eef1a2               |
| Clat_adaptor_s                          | P62743                                        | AP-2 complex subunit sigma                                                                                                                                                                        | Ap2s1                |
| Ras                                     | P62746                                        | Rho-related GTP-binding protein RhoB                                                                                                                                                              | Rhob                 |
| EF-hand_7                               | P62748                                        | Hippocalcin-like protein 1                                                                                                                                                                        | Hpcal1               |
| EF-hand_1                               | P62761                                        | Visinin-like protein 1                                                                                                                                                                            | Vsnl1                |
| Ank_2                                   | P62774                                        | Myotrophin                                                                                                                                                                                        | Mtpn                 |
| Histone                                 | P62806                                        | Histone H4                                                                                                                                                                                        | Hist1h4a             |
| Neur_chan_LBD;Neur_chan_memb            | P62812                                        | Gamma-aminobutyric acid receptor subunit alpha-1                                                                                                                                                  | Gabra1               |
| ATP-synt_ab;ATP-synt_ab_C;ATP-synt_ab_N | P62814                                        | V-type proton ATPase subunit B, brain isoform                                                                                                                                                     | Atp6v1b2             |
| Ras                                     | P62821;Q8K386                                 | Ras-related protein Rab-1A                                                                                                                                                                        | Rab1A                |
| Ras                                     | P62823                                        | Ras-related protein Rab-3C                                                                                                                                                                        | Rab3c                |
| Ras                                     | P62827;Q61820                                 | GTP-binding nuclear protein Ran;GTP-binding nuclear protein Ran, testis-specific isoform                                                                                                          | Ran;Rasl2-9          |
| WD40                                    | P62874;Q61011                                 | Guanine nucleotide-binding protein G(I)/G(S)/G(T) subunit beta-1                                                                                                                                  | Gnb1                 |

# SUPPLEMENTARY DATA

|                              |                                          |                                                                                                                                          |              |
|------------------------------|------------------------------------------|------------------------------------------------------------------------------------------------------------------------------------------|--------------|
| WD40                         | P62880                                   | Guanine nucleotide-binding protein G(I)/G(S)/G(T) subunit beta-2                                                                         | Gnb2         |
| WD40                         | P62881-2;P62881                          | Guanine nucleotide-binding protein subunit beta-5                                                                                        | Gnb5         |
| Cytochrom_C                  | P62897;CON__P62894;P00015                | Cytochrome c, somatic                                                                                                                    | Cycs         |
| Ras                          | P63001;Q05144                            | Ras-related C3 botulinum toxin substrate 1;Ras-related C3 botulinum toxin substrate 2                                                    | Rac1;Rac2    |
| LisH;WD40                    | P63005;P63005-2                          | Platelet-activating factor acetylhydrolase IB subunit alpha                                                                              | Pafah1b1     |
| Ras                          | P63011                                   | Ras-related protein Rab-3A                                                                                                               | Rab3a        |
| HSP70                        | P63017                                   | Heat shock cognate 71 kDa protein                                                                                                        | Hspa8        |
| TCTP                         | P63028                                   | Translationally-controlled tumor protein                                                                                                 | Tpt1         |
| MPC                          | P63030                                   | Mitochondrial pyruvate carrier 1                                                                                                         | Mpc1         |
| CTDII;DnaJ;DnaJ_CXXCXGXG     | P63037                                   | DnaJ homolog subfamily A member 1                                                                                                        | Dnaja1       |
| Cpn60_TCP1                   | P63038;P63038-2                          | 60 kDa heat shock protein, mitochondrial                                                                                                 | Hspd1        |
| Synaptobrevin                | P63044;P63024                            | Vesicle-associated membrane protein 2;Vesicle-associated membrane protein 3                                                              | Vamp2;Vamp3  |
|                              | P63054                                   | Purkinje cell protein 4                                                                                                                  | Pcp4         |
| Neur_chan_LBD;Neur_chan_memb | P63080                                   | Gamma-aminobutyric acid receptor subunit beta-3                                                                                          | Gabrb3       |
| ATP-synt_C                   | P63082                                   | V-type proton ATPase 16 kDa proteolipid subunit                                                                                          | Atp6v0c      |
| Pkinase                      | P63085;Q61532;Q6P5G0                     | Mitogen-activated protein kinase 1                                                                                                       | Mapk1        |
| G-alpha                      | P63094;Q6R0H7;P63094-2;Q6R0H7-4;P63094-3 | Guanine nucleotide-binding protein G(s) subunit alpha isoforms short;Guanine nucleotide-binding protein G(s) subunit alpha isoforms XLas | Gnas         |
| 14/3/2003                    | P63101                                   | 14-3-3 protein zeta/delta                                                                                                                | Ywhaz        |
| AA_permease_2                | P63115                                   | Asc-type amino acid transporter 1                                                                                                        | Slc7a10      |
| Neur_chan_LBD;Neur_chan_memb | P63137;P63137-2                          | Gamma-aminobutyric acid receptor subunit beta-2                                                                                          | Gabrb2       |
| BTB_2;Ion_trans              | P63141                                   | Potassium voltage-gated channel subfamily A member 2                                                                                     | Kcna2        |
| HMG_box;HMG_box_2            | P63158                                   | High mobility group protein B1                                                                                                           | Hmgb1        |
| G-gamma                      | P63213                                   | Guanine nucleotide-binding protein G(I)/G(S)/G(O) subunit gamma-2                                                                        | Gng2         |
| G-gamma                      | P63216                                   | Guanine nucleotide-binding protein G(I)/G(S)/G(O) subunit gamma-3                                                                        | Gng3         |
| eIF-5a                       | P63242;Q8BGY2                            | Eukaryotic translation initiation factor 5A-1;Eukaryotic translation initiation factor 5A-2                                              | Eif5a;Eif5a2 |
| Actin                        | P63260                                   | Actin, cytoplasmic 2;Actin, cytoplasmic 2, N-terminally processed                                                                        | Actg1        |
| C1_1;C2;Pkinase;Pkinase_C    | P63318                                   | Protein kinase C gamma type                                                                                                              | Prkcg        |

# SUPPLEMENTARY DATA

|                            |                                   |                                                                                                                           |                         |
|----------------------------|-----------------------------------|---------------------------------------------------------------------------------------------------------------------------|-------------------------|
| Ras                        | P63321                            | Ras-related protein Ral-A                                                                                                 | Rala                    |
| Metallophos                | P63328;P63328-2;P48455            | Serine/threonine-protein phosphatase 2B catalytic subunit alpha isoform                                                   | Ppp3ca                  |
| Metallophos                | P63330                            | Serine/threonine-protein phosphatase 2A catalytic subunit alpha isoform                                                   | Ppp2ca                  |
| Band_7                     | P67778                            | Prohibitin                                                                                                                | Phb                     |
| Actin                      | P68033;P68134;P62737;P63268       | Actin, alpha cardiac muscle 1;Actin, alpha skeletal muscle;Actin, aortic smooth muscle;Actin, gamma-enteric smooth muscle | Actc1;Acta1;Acta2;Actg2 |
| Pkinase                    | P68181;P68181-4;P68181-2;P68181-3 | cAMP-dependent protein kinase catalytic subunit beta                                                                      | Prkacb                  |
| 14/3/2003                  | P68254;P68254-2                   | 14-3-3 protein theta                                                                                                      | Ywhaq                   |
| Tubulin;Tubulin_C          | P68368                            | Tubulin alpha-4A chain                                                                                                    | Tuba4a                  |
| Tubulin;Tubulin_C          | P68369;P05214                     | Tubulin alpha-1A chain;Tubulin alpha-3 chain                                                                              | Tuba1a;Tuba3a           |
| Tubulin;Tubulin_C          | P68372                            | Tubulin beta-4B chain                                                                                                     | Tubb4b                  |
| C1_1;C2;Pkinase;Pkinase_C  | P68404-2;P68404                   | Protein kinase C beta type                                                                                                | Prkcb                   |
| 14/3/2003                  | P68510                            | 14-3-3 protein eta                                                                                                        | Ywhah                   |
| IBN_N                      | P70168                            | Importin subunit beta-1                                                                                                   | Kpnb1                   |
| Pr_beta_C;Proteasome       | P70195                            | Proteasome subunit beta type-7                                                                                            | Psmb7                   |
| Latexin                    | P70202                            | Latexin                                                                                                                   | Lxn                     |
| Plexin_cytopl;PSI;Sema;TIG | P70206;P70208;P70208-2            | Plexin-A1                                                                                                                 | Plxna1                  |
| Bravo_FIGEY;fn3;I-set      | P70232-2;P70232                   | Neural cell adhesion molecule L1-like protein;Processed neural cell adhesion molecule L1-like protein                     | Chl1                    |
| EBP                        | P70245                            | 3-beta-hydroxysteroid-Delta(8),Delta(7)-isomerase                                                                         | Ebp                     |
| PBP                        | P70296;Q8VIN1-2;Q8VIN1            | Phosphatidylethanolamine-binding protein 1;Hippocampal cholinergic neurostimulating peptide                               | Pebp1                   |
| SAM_2                      | P70302                            | Stromal interaction molecule 1                                                                                            | Stim1                   |
| HIT                        | P70349                            | Histidine triad nucleotide-binding protein 1                                                                              | Hint1                   |
| Iso_dh                     | P70404                            | Isocitrate dehydrogenase [NAD] subunit gamma 1, mitochondrial                                                             | Idh3g                   |
| Calx-beta;Na_Ca_ex         | P70414                            | Sodium/calcium exchanger 1                                                                                                | Slc8a1                  |
| EBP50_C-term;PDZ           | P70441                            | Na(+)/H(+) exchange regulatory cofactor NHE-RF1                                                                           | Slc9a3r1                |
| FOLN;Kazal_2;SPARC_Ca_bdg  | P70663                            | SPARC-like protein 1                                                                                                      | Sparc1                  |
| E1-E2_ATPase               | P70704;P70704-3;Q148W0            | Phospholipid-transporting ATPase IA                                                                                       | Atp8a1                  |
| Cpn60_TCP1                 | P80313                            | T-complex protein 1 subunit eta                                                                                           | Cct7                    |
| Cpn60_TCP1                 | P80314                            | T-complex protein 1 subunit beta                                                                                          | Cct2                    |
| Cpn60_TCP1                 | P80315                            | T-complex protein 1 subunit delta                                                                                         | Cct4                    |
| Cpn60_TCP1                 | P80316                            | T-complex protein 1 subunit epsilon                                                                                       | Cct5                    |
| Cpn60_TCP1                 | P80317;Q61390                     | T-complex protein 1 subunit zeta                                                                                          | Cct6a                   |

# SUPPLEMENTARY DATA

|                                         |                                            |                                                                                                                                                      |           |
|-----------------------------------------|--------------------------------------------|------------------------------------------------------------------------------------------------------------------------------------------------------|-----------|
| Cpn60_TCP1                              | P80318                                     | T-complex protein 1 subunit gamma                                                                                                                    | Cct3      |
| Receptor_IA-2;Y_phosphatase             | P80560                                     | Receptor-type tyrosine-protein phosphatase N2                                                                                                        | Ptpn2     |
| EF-hand_7                               | P81117                                     | Nucleobindin-2;Nesfatin-1                                                                                                                            | Nucb2     |
| Skp1_POZ                                | P83940                                     | Transcription elongation factor B polypeptide 1                                                                                                      | Tceb1     |
| EF-hand_1                               | P84075                                     | Neuron-specific calcium-binding protein hippocalcin                                                                                                  | Hpca      |
| Arf                                     | P84084                                     | ADP-ribosylation factor 5                                                                                                                            | Arf5      |
| Synaphin                                | P84086                                     | Complexin-2                                                                                                                                          | Cplx2     |
| Adap_comp_sub;Clat_adaptor_s            | P84091                                     | AP-2 complex subunit mu                                                                                                                              | Ap2m1     |
| Ras                                     | P84096                                     | Rho-related GTP-binding protein RhoG                                                                                                                 | Rhog      |
| DUF1053;Guanylate_cyc                   | P84309;P84309-2;Q01341;P51829              | Adenylate cyclase type 5                                                                                                                             | Adcy5     |
| I-set                                   | P97300;P97300-1;P97300-4                   | Neuroplastin                                                                                                                                         | Nptn      |
| I-set                                   | P97300-3                                   | Neuroplastin                                                                                                                                         | Nptn      |
| LIM                                     | P97315                                     | Cysteine and glycine-rich protein 1                                                                                                                  | Csrp1     |
| Na_K-ATPase                             | P97370                                     | Sodium/potassium-transporting ATPase subunit beta-3                                                                                                  | Atp1b3    |
| Annexin                                 | P97384                                     | Annexin A11                                                                                                                                          | Anxa11    |
| Amidohydro_1                            | P97427                                     | Dihydropyrimidinase-related protein 1                                                                                                                | Crmp1     |
| Annexin                                 | P97429                                     | Annexin A4                                                                                                                                           | Anxa4     |
| Cation_efflux                           | P97441                                     | Zinc transporter 3                                                                                                                                   | Slc30a3   |
| Cu2_monoox_C;Cu2_monooxygen;NHL         | P97467                                     | Peptidyl-glycine alpha-amidating monooxygenase;Peptidylglycine alpha-hydroxylating monooxygenase;Peptidyl-alpha-hydroxyglycine alpha-amidating lyase | Pam       |
| GRAM;WWbp                               | P97765;P97765-2                            | WW domain-binding protein 2                                                                                                                          | Wbp2      |
| 7tm_3;ANF_receptor;GluR_Homer-bdg;NCD3G | P97772;P97772-2;P97772-3                   | Metabotropic glutamate receptor 1                                                                                                                    | Grm1      |
| C1-set;V-set                            | P97797-2;P97797;P97797-4;P97797-3          | Tyrosine-protein phosphatase non-receptor type substrate 1                                                                                           | Sirpa     |
| fn3;I-set;Neogenin_C                    | P97798;P97798-5;P97798-2;P97798-3;P97798-4 | Neogenin                                                                                                                                             | Neo1      |
| FumaraseC_C;Lyase_1                     | P97807;P97807-2                            | Fumarate hydratase, mitochondrial                                                                                                                    | Fh        |
| ig                                      | P97952                                     | Sodium channel subunit beta-1                                                                                                                        | Scn1b     |
| CTP_transf_1                            | P98191                                     | Phosphatidate cytidyltransferase 1                                                                                                                   | Cds1      |
| E1-E2_ATPase                            | P98200                                     | Phospholipid-transporting ATPase IB                                                                                                                  | Atp8a2    |
| Tubulin;Tubulin_C                       | P99024                                     | Tubulin beta-5 chain                                                                                                                                 | Tubb5     |
| Proteasome                              | P99026                                     | Proteasome subunit beta type-4                                                                                                                       | Psm4      |
| UCR_hinge                               | P99028                                     | Cytochrome b-c1 complex subunit 6, mitochondrial                                                                                                     | Uqcrh     |
| Redoxin                                 | P99029;P99029-2                            | Peroxisoredoxin-5, mitochondrial                                                                                                                     | Prdx5     |
| Peptidase_M14                           | Q00493                                     | Carboxypeptidase E                                                                                                                                   | Cpe       |
| Serpin                                  | Q00898                                     | Alpha-1-antitrypsin 1-5                                                                                                                              | Serpina1e |



# SUPPLEMENTARY DATA

|                                                 |                                            |                                                                              |             |
|-------------------------------------------------|--------------------------------------------|------------------------------------------------------------------------------|-------------|
| PDEase_I;PDEase_I_N                             | Q01065;Q64338;Q64338-2;Q64338-1            | Calcium/calmodulin-dependent 3,5-cyclic nucleotide phosphodiesterase 1B      | Pde1b       |
| ANF_receptor;Lig_chan;Lig_chan-Glu_bd;NMDAR2_C  | Q01097;Q01098;Q03391                       | Glutamate receptor ionotropic, NMDA 2B                                       | Grin2b      |
| NDK                                             | Q01768                                     | Nucleoside diphosphate kinase B                                              | Nme2        |
| AAA;CDC48_2;CDC48_N;Vps4_C                      | Q01853                                     | Transitional endoplasmic reticulum ATPase                                    | Vcp         |
| ThiF;UBA_e1_C;UBA_e1_thiolCys;UBACT             | Q02053;P31254                              | Ubiquitin-like modifier-activating enzyme 1                                  | Uba1        |
| Collagen;TNF                                    | Q02105                                     | Complement C1q subcomponent subunit C                                        | C1qc        |
| Arm                                             | Q02248                                     | Catenin beta-1                                                               | Ctnnb1      |
| Arm                                             | Q02257                                     | Junction plakoglobin                                                         | Jup         |
| EF-hand_7                                       | Q02819                                     | Nucleobindin-1                                                               | Nucb1       |
| EphA2_TM;Ephrin_lbd;fn3;Pkinase_Tyr;SAM_2       | Q03137;Q03137-2                            | Ephrin type-A receptor 4                                                     | Epha4       |
| APP_amyloid;APP_Cu_bd;APP_E2;APP_N              | Q03157                                     | Amyloid-like protein 1;C30                                                   | Aplp1       |
| ATP-synt_ab;ATP-synt_ab_C;ATP-synt_ab_N         | Q03265                                     | ATP synthase subunit alpha, mitochondrial                                    | Atp5a1      |
| ATP-gua_Ptrans;ATP-gua_PtransN                  | Q04447                                     | Creatine kinase B-type                                                       | Ckb         |
| EF-hand_5;EF-hand_7                             | Q05186                                     | Reticulocalbin-1                                                             | Rcn1        |
| Lipocalin                                       | Q05816                                     | Fatty acid-binding protein, epidermal                                        | Fabp5       |
| ATP-synt_E                                      | Q06185                                     | ATP synthase subunit e, mitochondrial                                        | Atp5i       |
| APP_amyloid;APP_Cu_bd;APP_E2;APP_N              | Q06335;Q06335-2                            | Amyloid-like protein 2                                                       | Aplp2       |
| Clusterin                                       | Q06890                                     | Clusterin;Clusterin beta chain;Clusterin alpha chain                         | Clu         |
| Annexin                                         | Q07076                                     | Annexin A7                                                                   | Anxa7       |
| EF-hand_6;EF-hand_7                             | Q08331                                     | Calretinin                                                                   | Calb2       |
| BK_channel_a;Ion_trans;TrkA_N                   | Q08460;Q08460-5;Q08460-2;Q08460-4;Q08460-3 | Calcium-activated potassium channel subunit alpha-1                          | Kcnma1      |
| Integrin_beta                                   | Q0VBDO                                     | Integrin beta                                                                | Itgb8       |
|                                                 | Q0VGU4                                     |                                                                              | Vgf         |
| ERAP1_C;Peptidase_M1                            | Q11011                                     | Puromycin-sensitive aminopeptidase                                           | Npepps      |
| AMP_N;Peptidase_M24                             | Q11136                                     | Xaa-Pro dipeptidase                                                          | Pepd        |
| DnaJ;DUF1977                                    | Q149L6;Q149L6-2                            | DnaJ homolog subfamily B member 14                                           | Dnajb14     |
| 7tm_3;ANF_receptor;NCD3G                        | Q14BI2;Q68EF4;Q68EF4-2                     | Metabotropic glutamate receptor 2                                            | Grm2        |
| C2;Copine                                       | Q1RLL3                                     | Copine-9                                                                     | Cpne9       |
| Sec7                                            | Q2PFD7;Q2PFD7-3;Q2PFD7-5;Q2PFD7-2;Q2PFD7-4 | PH and SEC7 domain-containing protein 3                                      | Psd3        |
|                                                 | Q3TAS6-2;Q3TAS6                            | ER membrane protein complex subunit 10                                       | Emc10       |
| STT3                                            | Q3TDQ1                                     | Dolichyl-diphosphooligosaccharide--protein glycosyltransferase subunit STT3B | Stt3b       |
| Tweety                                          | Q3TH73;Q3TH73-2                            | Protein tweety homolog 2                                                     | Ttyh2       |
| EF-hand_1;EF-hand_7                             | Q3THE2;Q9CQ19                              | Myosin regulatory light chain 12B;Myosin regulatory light polypeptide 9      | My112b;My19 |
| S-AdoMet_synt_C;S-AdoMet_synt_M;S-AdoMet_synt_N | Q3THS6;Q91X83                              | S-adenosylmethionine synthase isoform type-2                                 | Mat2a       |

# SUPPLEMENTARY DATA

|                                         |                                                                                                         |                                                                  |          |
|-----------------------------------------|---------------------------------------------------------------------------------------------------------|------------------------------------------------------------------|----------|
| MFS_1                                   | Q3TXX4;Q8BFU8;Q5SZA1;Q61983;Q5SZA1-2                                                                    | Vesicular glutamate transporter 1                                | Slc17a7  |
| CPSF_A                                  | Q3U1J4                                                                                                  | DNA damage-binding protein 1                                     | Ddb1     |
|                                         | Q3UBX0                                                                                                  | Transmembrane protein 109                                        | Tmem109  |
| Hydrolase_6                             | Q3UGR5;Q3UGR5-2                                                                                         | Haloacid dehalogenase-like hydrolase domain-containing protein 2 | Hdhd2    |
| Sugar_tr                                | Q3UHH2;Q3UHH2-2                                                                                         | Solute carrier family 22 member 23                               | Slc22a23 |
| Sugar_tr                                | Q3UHK1                                                                                                  | Proton myo-inositol cotransporter                                | Slc2a13  |
| EGF_2;hEGF;RHS_repeat;Ten_N;Tox-GHH     | Q3UHK6;Q3UHK6-2;Q3UHK6-4;Q3UHK6-3;Q9WTS6;Q9WTS6-2;Q9WTS6-3;Q9WTS6-4;Q9WTS6-6;Q9WTS6-8;Q9WTS6-5;Q9WTS6-7 | Teneurin-4                                                       | Tenm4    |
| Pkinase                                 | Q3UHL1                                                                                                  | CaM kinase-like vesicle-associated protein                       | Camkv    |
| NAD_Gly3P_dh_C;NAD_Gly3P_dh_N           | Q3ULJ0;Q3ULJ0-2                                                                                         | Glycerol-3-phosphate dehydrogenase 1-like protein                | Gpd1l    |
| LRR_4                                   | Q3UM45                                                                                                  | Protein phosphatase 1 regulatory subunit 7                       | Ppp1r7   |
| Acyltransferase                         | Q3UN02                                                                                                  | Lysocardiolipin acyltransferase 1                                | Lclat1   |
| PGAP1                                   | Q3UUQ7                                                                                                  | GPI inositol-deacylase                                           | Pgap1    |
| Peptidase_M28                           | Q3UVK0;Q3UVK0-2                                                                                         | Endoplasmic reticulum metalloproteinase 1                        | Ermp1    |
| 7tm_3;ANF_receptor;GluR_Homer-bdg;NCD3G | Q3UVX5;Q3UVX5-2                                                                                         | Metabotropic glutamate receptor 5                                | Grm5     |
|                                         | Q3UZV7;Q3UZV7-3;Q3UZV7-2;Q3UZV7-5                                                                       | UPF0577 protein KIAA1324-like homolog                            |          |
| Costars                                 | Q4KML4                                                                                                  | Costars family protein ABRACL                                    | Abrac1   |
| LysM;TLD                                | Q4KMM3;Q4KMM3-2;Q4KMM3-4;Q4KMM3-3                                                                       | Oxidation resistance protein 1                                   | Oxr1     |
| CUB;Sushi                               | Q4V9Z5-2;Q4V9Z5-3;Q4V9Z5                                                                                | Seizure 6-like protein 2                                         | Sez6l2   |
| DUF747                                  | Q4VBD2                                                                                                  | Transmembrane anterior posterior transformation protein 1        | Tapt1    |
| V-set                                   | Q56A07                                                                                                  | Sodium channel subunit beta-2                                    | Scn2b    |
| Lgl_C;LLGL;WD40                         | Q5DQR4;Q5DQR4-4;Q5DQR4-2;Q5DQR4-3;Q5DQR4-5;Q5DQR4-6                                                     | Syntaxin-binding protein 5-like                                  | Stxbp5l  |
| Band_3_cyto;HCO3_cotransp               | Q5DTL9;Q5DTL9-9;Q5DTL9-5;Q5DTL9-2;Q5DTL9-7;Q5DTL9-3;Q5DTL9-10;Q5DTL9-6;Q5DTL9-8;Q5DTL9-4                | Sodium-driven chloride bicarbonate exchanger                     | Slc4a10  |
| BTB_2                                   | Q5DTY9                                                                                                  | BTB/POZ domain-containing protein KCTD16                         | Kctd16   |
| CRAL_TRIO_2;RhoGAP                      | Q5FWK3                                                                                                  | Rho GTPase-activating protein 1                                  | Arhgap1  |
| CNRIP1                                  | Q5M8N0                                                                                                  | CB1 cannabinoid receptor-interacting protein 1                   | Cnrip1   |
| Ras                                     | Q5PR73                                                                                                  | GTP-binding protein Di-Ras2                                      | Diras2   |
| FragX_IP                                | Q5SQX6                                                                                                  | Cytoplasmic FMR1-interacting protein 2                           | Cyfp2    |
| IQ;Myosin_head;Myosin_TH1               | Q5SYD0-2;Q5SYD0;Q5SUA5                                                                                  | Unconventional myosin-Id                                         | Myo1d    |
| E1_dh;Transket_pyr                      | Q60597;Q60597-3;Q60597-2;Q60597-4                                                                       | 2-oxoglutarate dehydrogenase, mitochondrial                      | Ogdh     |
| ICAM_N                                  | Q60625                                                                                                  | Intercellular adhesion molecule 5                                | Icam5    |
| SH2;SH3_1                               | Q60631;Q60631-2                                                                                         | Growth factor receptor-bound protein 2                           | Grb2     |

# SUPPLEMENTARY DATA

|                                    |                                                            |                                                                                           |                |
|------------------------------------|------------------------------------------------------------|-------------------------------------------------------------------------------------------|----------------|
| Band_7                             | Q60634;Q60634-3;Q60634-2                                   | Flotillin-2                                                                               | Flot2          |
| CBFNT;RRM_1                        | Q60668;Q60668-3;Q60668-4;Q60668-2;Q9Z130                   | Heterogeneous nuclear ribonucleoprotein D0;Heterogeneous nuclear ribonucleoprotein D-like | Hnrnpd;Hnrnpdl |
| Receptor_IA-2;RESP18;Y_phosphatase | Q60673                                                     | Receptor-type tyrosine-protein phosphatase-like N                                         | Ptpn           |
| Metallophos;PPP5;TPR_1             | Q60676                                                     | Serine/threonine-protein phosphatase 5                                                    | Ppp5c          |
| Proteasome                         | Q60692                                                     | Proteasome subunit beta type-6                                                            | Psmb6          |
| Pkinase                            | Q60737                                                     | Casein kinase II subunit alpha                                                            | Csnk2a1        |
| Cation_efflux                      | Q60738                                                     | Zinc transporter 1                                                                        | Slc30a1        |
| Serpin                             | Q60854                                                     | Serpin B6                                                                                 | Serpinb6       |
| TPR_1;TPR_8                        | Q60864                                                     | Stress-induced-phosphoprotein 1                                                           | Stip1          |
| TB2_DP1_HVA22                      | Q60870                                                     | Receptor expression-enhancing protein 5                                                   | Reep5          |
| Porin_3                            | Q60930                                                     | Voltage-dependent anion-selective channel protein 2                                       | Vdac2          |
| Porin_3                            | Q60931                                                     | Voltage-dependent anion-selective channel protein 3                                       | Vdac3          |
| Porin_3                            | Q60932-2;Q60932                                            | Voltage-dependent anion-selective channel protein 1                                       | Vdac1          |
| CDC37_C;CDC37_M;CDC37_N            | Q61081                                                     | Hsp90 co-chaperone Cdc37;Hsp90 co-chaperone Cdc37, N-terminally processed                 | Cdc37          |
| EF-hand_5;EF-hand_7                | Q61112;Q61112-2;Q9BRK5;Q9BRK5-4;Q9BRK5-3;Q9BRK5-2;Q9BRK5-6 | 45 kDa calcium-binding protein                                                            | Sdf4           |
|                                    | Q61137;Q61137-2                                            | Astrotactin-1                                                                             | Astn1          |
| Na_H_Exchange                      | Q61165                                                     | Sodium/hydrogen exchanger 1                                                               | Slc9a1         |
| 1-cysPrx_C;AhpC-TSA                | Q61171                                                     | Peroxiredoxin-2                                                                           | Prdx2          |
|                                    | Q61206                                                     | Platelet-activating factor acetylhydrolase IB subunit beta                                | Pafah1b2       |
| SapA;SapB_1;SapB_2                 | Q61207                                                     | Prosaposin                                                                                | Psap           |
| EGF_3;EGF_CA;Laminin_G_2;VWC       | Q61220                                                     | Protein kinase C-binding protein NELL2                                                    | Nell2          |
| Ca_chan_IQ;Ion_trans               | Q61290                                                     | Voltage-dependent R-type calcium channel subunit alpha-1E                                 | Cacla1e        |
| Vinculin                           | Q61301;Q61301-3;Q61301-2;P26231                            | Catenin alpha-2                                                                           | Ctnna2         |
| HSP70                              | Q61316                                                     | Heat shock 70 kDa protein 4                                                               | Hspa4          |
| SNF                                | Q61327                                                     | Sodium-dependent dopamine transporter                                                     | Slc6a3         |
| fn3;I-set                          | Q61330                                                     | Contactin-2                                                                               | Cntn2          |
|                                    | Q61335                                                     | B-cell receptor-associated protein 31                                                     | Bcap31         |
| EGF;Lectin_C;Sushi;V-set;Xlink     | Q61361                                                     | Brevican core protein                                                                     | Bcan           |
| Ras                                | Q61411;P23175;P01115;Q61411-2;P01113                       | GTPase HRas;GTPase HRas, N-terminally processed                                           | Hras           |
| BTB_2;Ion_trans;K_channel_TID      | Q61423                                                     | Potassium voltage-gated channel subfamily A member 4                                      | Kcna4          |
| 3HCDH;3HCDH_N                      | Q61425                                                     | Hydroxyacyl-coenzyme A dehydrogenase, mitochondrial                                       | Hadh           |

# SUPPLEMENTARY DATA

|                                                 |                                   |                                                                         |         |
|-------------------------------------------------|-----------------------------------|-------------------------------------------------------------------------|---------|
| PDEase_I;PDEase_I_N                             | Q61481;Q61481-5;Q61481-6;Q61481-2 | Calcium/calmodulin-dependent 3,5-cyclic nucleotide phosphodiesterase 1A | Pde1a   |
| C2-set_2                                        | Q61490                            | CD166 antigen                                                           | Alcam   |
| 5_nucleotid_C;Metallophos                       | Q61503                            | 5-nucleotidase                                                          | Nt5e    |
| Cys_rich_FGFR                                   | Q61543                            | Golgi apparatus protein 1                                               | Glg1    |
| ANTH                                            | Q61548;Q61548-3;Q61548-2          | Clathrin coat assembly protein AP180                                    | Snap91  |
| Fascin                                          | Q61553                            | Fascin                                                                  | Fscn1   |
| GDI                                             | Q61598;Q61598-2                   | Rab GDP dissociation inhibitor beta                                     | Gdi2    |
| FCH;SH3_9                                       | Q61644                            | Protein kinase C and casein kinase substrate in neurons protein 1       | Pacsin1 |
| HSP70                                           | Q61699;Q61699-2                   | Heat shock protein 105 kDa                                              | Hsph1   |
| CD47;V-set_CD47                                 | Q61735                            | Leukocyte surface antigen CD47                                          | Cd47    |
| CD47;V-set_CD47                                 | Q61735-2                          | Leukocyte surface antigen CD47                                          | Cd47    |
| 2-Hacid_dh;2-Hacid_dh_C                         | Q61753                            | D-3-phosphoglycerate dehydrogenase                                      | Phgdh   |
| IQ;Myosin_head;Myosin_N;Myosin_tail_1           | Q61879;O08638;O08638-2            | Myosin-10                                                               | Myh10   |
| V-set                                           | Q61885                            | Myelin-oligodendrocyte glycoprotein                                     | Mog     |
| DED                                             | Q62048;Q62048-2                   | Astrocytic phosphoprotein PEA-15                                        | Pea15   |
| EGF;Lectin_C;Sushi;V-set;Xlink                  | Q62059;Q62059-4;Q62059-3;Q62059-2 | Versican core protein                                                   | Vcan    |
| Arylesterase                                    | Q62086                            | Serum paraoxonase/arylesterase 2                                        | Pon2    |
| Guanylate_kin;MAGUK_N_PEST;PDZ;PDZ_ass oc;SH3_2 | Q62108;Q62108-3;Q62108-2          | Disks large homolog 4                                                   | Dlg4    |
| PSI;Sema                                        | Q62178                            | Semaphorin-4A                                                           | Sema4a  |
| TRAP-delta                                      | Q62186                            | Translocon-associated protein subunit delta                             | Ssr4    |
| Amidohydro_1                                    | Q62188                            | Dihydropyrimidinase-related protein 3                                   | Dpysl3  |
| CH;Spectrin                                     | Q62261;Q62261-2                   | Spectrin beta chain, non-erythrocytic 1                                 | Sptbn1  |
| MARVEL                                          | Q62277                            | Synaptophysin                                                           | Syp     |
| Tetraspanin                                     | Q62283                            | Tetraspanin-7                                                           | Tspan7  |
| Translin                                        | Q62348                            | Translin                                                                | Tsn     |
| PA;Peptidase_M28;TFR_dimer                      | Q62351                            | Transferrin receptor protein 1                                          | Tfrc    |
| BAR;SH3_1;SH3_9                                 | Q62420;Q62419                     | Endophilin-A1                                                           | Sh3gl2  |
| B12D                                            | Q62425                            | Cytochrome c oxidase subunit NDUFA4                                     | Ndufa4  |
| Ndr                                             | Q62433                            | Protein NDRG1                                                           | Ndrg1   |
| Synaptobrevin                                   | Q62442;Q62442-2                   | Vesicle-associated membrane protein 1                                   | Vamp1   |
| Pentaxin                                        | Q62443                            | Neuronal pentraxin-1                                                    | Nptx1   |
| EF-hand_1;EF-hand_7                             | Q63810;Q63810-2;Q63811            | Calcineurin subunit B type 1                                            | Ppp3r1  |
| LRR_4;LRR_8;LRRNT                               | Q63912                            | Oligodendrocyte-myelin glycoprotein                                     | Omg     |
| V-set                                           | Q640R3                            | Hepatocyte cell adhesion molecule                                       | Hepacam |
| adh_short                                       | Q64105                            | Sepiapterin reductase                                                   | Spr     |

# SUPPLEMENTARY DATA

|                                        |                                                                                                                     |                                                                                                              |         |
|----------------------------------------|---------------------------------------------------------------------------------------------------------------------|--------------------------------------------------------------------------------------------------------------|---------|
| Amino_oxidase                          | Q64133                                                                                                              | Amine oxidase [flavin-containing] A                                                                          | Maoa    |
| SURF4                                  | Q64310                                                                                                              | Surfeit locus protein 4                                                                                      | Surf4   |
| CD34_antigen                           | Q64314;Q64314-2                                                                                                     | Hematopoietic progenitor cell antigen CD34                                                                   | Cd34    |
| Synapsin;Synapsin_C;Synapsin_N         | Q64332;Q64332-2                                                                                                     | Synapsin-2                                                                                                   | Syn2    |
| Cpn10                                  | Q64433                                                                                                              | 10 kDa heat shock protein, mitochondrial                                                                     | Hspe1   |
| Carb_anhydrase                         | Q64444                                                                                                              | Carbonic anhydrase 4                                                                                         | Ca4     |
| fn3;Y_phosphatase                      | Q64455                                                                                                              | Receptor-type tyrosine-protein phosphatase eta                                                               | Ptprj   |
| fn3;I-set;Y_phosphatase                | Q64487;Q64487-12;Q64487-5;Q64487-7;Q64487-6;Q64487-1;Q64487-11;Q64487-9;Q64487-10;Q64487-8;Q64487-2;Q64487-3;A2A8L5 | Receptor-type tyrosine-protein phosphatase delta                                                             | Ptprd   |
| Peptidase_S8;TPPII                     | Q64514;Q64514-2                                                                                                     | Tripeptidyl-peptidase 2                                                                                      | Tpp2    |
| FGGY_C;FGGY_N                          | Q64516;Q64516-1;Q64516-2                                                                                            | Glycerol kinase                                                                                              | Gk      |
| DAO;EF-hand_7                          | Q64521                                                                                                              | Glycerol-3-phosphate dehydrogenase, mitochondrial                                                            | Gpd2    |
| UDPGT                                  | Q64676                                                                                                              | 2-hydroxyacylsphingosine 1-beta-galactosyltransferase                                                        | Ugt8    |
| Sushi                                  | Q64735;Q64735-2                                                                                                     | Complement component receptor 1-like protein                                                                 | Cr11    |
| Na_sulph_symp                          | Q67BT3                                                                                                              | Solute carrier family 13 member 5                                                                            | Slc13a5 |
| 7tm_3;ANF_receptor;NCD3G               | Q68ED2                                                                                                              | Metabotropic glutamate receptor 7                                                                            | Grm7    |
| Clathrin;Clathrin_propel;Clathrin-link | Q68FD5                                                                                                              | Clathrin heavy chain 1                                                                                       | Cltc    |
| APG9                                   | Q68FE2                                                                                                              | Autophagy-related protein 9A                                                                                 | Atg9a   |
| fn3;I-set                              | Q69Z26;Q69Z26-2;Q69Z26-3;Q07409                                                                                     | Contactin-4                                                                                                  | Cntn4   |
| COesterase                             | Q69ZK9;B0F2B4                                                                                                       | Neurologin-2                                                                                                 | Nlgn2   |
| MFS_1;Pentapeptide_4;Sugar_tr          | Q69ZS6                                                                                                              | Synaptic vesicle glycoprotein 2C                                                                             | Sv2c    |
|                                        | Q6GQT9                                                                                                              | Nodal modulator 1                                                                                            | Nomo1   |
| DPPIV_N;Peptidase_S9                   | Q6NXX7                                                                                                              | Inactive dipeptidyl peptidase 10                                                                             | Dpp10   |
| EF-hand_7                              | Q6P069;Q6P069-2                                                                                                     | Sorcin                                                                                                       | Sri     |
| CUB;Sushi                              | Q6P1D5;Q6P1D5-2                                                                                                     | Seizure 6-like protein                                                                                       | Sez6l   |
|                                        | Q6P1F6;Q925E7;Q8BG02;Q6ZWR4;Q6ZWR4-3;Q6ZWR4-2                                                                       | Serine/threonine-protein phosphatase 2A 55 kDa regulatory subunit B alpha isoform                            | Ppp2r2a |
|                                        | Q6P2L7;Q6P2L7-3;Q6P2L7-2                                                                                            | Protein CASC4                                                                                                | Casc4   |
| UDP-g_GGTase                           | Q6P5E4                                                                                                              | UDP-glucose:glycoprotein glucosyltransferase 1                                                               | Uggt1   |
| Tweety                                 | Q6P5F7;Q6P5F7-2                                                                                                     | Protein tweety homolog 3                                                                                     | Ttyh3   |
| Laminin_G_2;Syndecan                   | Q6P9K9;Q6P9K9-2;Q8C985                                                                                              | Neurexin-3                                                                                                   | Nrxn3   |
| Glycos_transf_2;Ricin_B_lectin         | Q6PB93-2;Q6PB93                                                                                                     | Polypeptide N-acetylgalactosaminyltransferase 2;Polypeptide N-acetylgalactosaminyltransferase 2 soluble form | Galnt2  |
| PIG-S                                  | Q6PD26                                                                                                              | GPI transamidase component PIG-S                                                                             | Pigs    |
|                                        | Q6PE13                                                                                                              | Proline-rich transmembrane protein 3                                                                         | Prrt3   |

# SUPPLEMENTARY DATA

|                                                                       |                                                     |                                                                                                                                                                   |          |
|-----------------------------------------------------------------------|-----------------------------------------------------|-------------------------------------------------------------------------------------------------------------------------------------------------------------------|----------|
| CH;EB1                                                                | Q6PER3                                              | Microtubule-associated protein RP/EB family member 3                                                                                                              | Mapre3   |
| SNF                                                                   | Q6PGE7                                              | Sodium-dependent proline transporter                                                                                                                              | Slc6a7   |
| Ras                                                                   | Q6PHN9;Q923S9                                       | Ras-related protein Rab-35                                                                                                                                        | Rab35    |
| Cache_1;VGCC_alpha2;VWA;VWA_N                                         | Q6PHS9-4;Q6PHS9-2;Q6PHS9-5;Q6PHS9;Q6PHS9-3;Q6PHS9-6 | Voltage-dependent calcium channel subunit alpha-2/delta-2; Voltage-dependent calcium channel subunit alpha-2-2; Voltage-dependent calcium channel subunit delta-2 | Cacna2d2 |
|                                                                       | Q6PHU5;Q6PHU5-2                                     | Sortilin                                                                                                                                                          | Sort1    |
| CaMKII_AD;Pkinase                                                     | Q6PHZ2;Q6PHZ2-5;Q6PHZ2-2;Q6PHZ2-4                   | Calcium/calmodulin-dependent protein kinase type II subunit delta                                                                                                 | Camk2d   |
| Cation_ATPase_C;Cation_ATPase_N;E1-E2_ATPase;H-K_ATPase_N;Hydrolase   | Q6PIC6;Q64436                                       | Sodium/potassium-transporting ATPase subunit alpha-3                                                                                                              | Atp1a3   |
| Cation_ATPase_C;Cation_ATPase_N;E1-E2_ATPase;Hydrolase                | Q6PIE5                                              | Sodium/potassium-transporting ATPase subunit alpha-2                                                                                                              | Atp1a2   |
| ATP_Ca_trans_C;Cation_ATPase_C;Cation_ATPase_N;E1-E2_ATPase;Hydrolase | Q6Q477;Q6Q477-2                                     | Calcium-transporting ATPase                                                                                                                                       | Atp2b4   |
| VKOR                                                                  | Q6TEK5                                              | Vitamin K epoxide reductase complex subunit 1-like protein 1                                                                                                      | Vkorc111 |
| Choline_transpo                                                       | Q6X893;Q6X893-2                                     | Choline transporter-like protein 1                                                                                                                                | Slc44a1  |
| TIP120                                                                | Q6ZQ38                                              | Cullin-associated NEDD8-dissociated protein 1                                                                                                                     | Cand1    |
| Malectin                                                              | Q6ZQI3                                              | Malectin                                                                                                                                                          | Mlec     |
| SPC22                                                                 | Q6ZWQ7                                              |                                                                                                                                                                   | Spes3    |
| Chon_Sulph_att;Neural_ProG_Cyt                                        | Q71M36-2;Q71M36-3                                   | Chondroitin sulfate proteoglycan 5                                                                                                                                | Cspg5    |
| HEAT                                                                  | Q76MZ3                                              | Serine/threonine-protein phosphatase 2A 65 kDa regulatory subunit A alpha isoform                                                                                 | Ppp2r1a  |
|                                                                       | Q78IK2                                              | Up-regulated during skeletal muscle growth protein 5                                                                                                              | Usmg5    |
| NAP                                                                   | Q78ZA7                                              | Nucleosome assembly protein 1-like 4                                                                                                                              | Nap114   |
| Mito_carr                                                             | Q791T5;Q791T5-2                                     | Mitochondrial carrier homolog 1                                                                                                                                   | Mtch1    |
| Mito_carr                                                             | Q791V5                                              | Mitochondrial carrier homolog 2                                                                                                                                   | Mtch2    |
| V-set                                                                 | Q7M729                                              | Sodium channel subunit beta-4                                                                                                                                     | Scn4b    |
|                                                                       | Q7TMF3                                              | NADH dehydrogenase [ubiquinone] 1 alpha subcomplex subunit 12                                                                                                     | Ndufa12  |
| Tubulin;Tubulin_C                                                     | Q7TMM9                                              | Tubulin beta-2A chain                                                                                                                                             | Tubb2a   |
| ABC_tran;ABC2_membrane                                                | Q7TMS5                                              | ATP-binding cassette sub-family G member 2                                                                                                                        | Abcg2    |
| Exo_endo_phos                                                         | Q7TNC9;Q7TNC9-2                                     |                                                                                                                                                                   | Inpp5a   |
| V-set                                                                 | Q7TNR6                                              | Immunoglobulin superfamily member 21                                                                                                                              | Igsf21   |
| CH;EF-hand_6;EFhand_Ca_insen;Spectrin                                 | Q7TPR4;Q9JI91                                       | Alpha-actinin-1                                                                                                                                                   | Actn1    |
| p25-alpha                                                             | Q7TQD2                                              | Tubulin polymerization-promoting protein                                                                                                                          | Tppp     |
| BAR;SH3_9                                                             | Q7TQF7;D3Z6Q9                                       | Amphiphysin                                                                                                                                                       | Amph     |

# SUPPLEMENTARY DATA

|                                                      |                                                                              |                                                       |             |
|------------------------------------------------------|------------------------------------------------------------------------------|-------------------------------------------------------|-------------|
| Peptidase_C65                                        | Q7TQI3                                                                       | Ubiquitin thioesterase OTUB1                          | Otub1       |
| AdoHcyase;AdoHcyase_NAD                              | Q80SW1                                                                       | Putative adenosylhomocysteinase 2                     | Ahcy11      |
| 7tm_3;ANF_receptor                                   | Q80T41                                                                       | Gamma-aminobutyric acid type B receptor subunit 2     | Gabbr2      |
| DUF1041;PH                                           | Q80TJ1;Q80TJ1-4;Q80TJ1-2;Q8BYR5;Q8BYR5-2;Q8BYR5-5;Q8BYR5-4;Q8BYR5-3;Q8BYR5-6 | Calcium-dependent secretion activator 1               | Cadps       |
|                                                      | Q80TL4;Q80TL4-2                                                              | Protein KIAA1045                                      | Kiaa1045    |
| DnaJ;Thioredoxin                                     | Q80TN4                                                                       | DnaJ homolog subfamily C member 16                    | Dnajc16     |
| 7tm_2;DUF3497;Gal_Lectin;GPS;HRM;Latrophilin;OLF     | Q80TR1;Q80TR1-2                                                              | Latrophilin-1                                         | Lphn1       |
| 7tm_2;DUF3497;Gal_Lectin;GPS;HRM;Latrophilin;OLF     | Q80TS3;Q80TS3-2;Q80TS3-5;Q80TS3-3;Q80TS3-4;Q80TS3-6                          | Latrophilin-3                                         | Lphn3       |
| DnaJ;Pkinase;PTEN_C2                                 | Q80TZ3;Q80TZ3-2;Q80TZ3-3;Q99KY4;Q99KY4-2                                     | Putative tyrosine-protein phosphatase auxilin         | Dnajc6      |
| Plexin_cytopl;PSI;Sema;TIG                           | Q80UG2                                                                       | Plexin-A4                                             | Plxna4      |
| Septin                                               | Q80UG5;Q80UG5-3;Q80UG5-2                                                     | Septin-9                                              | septin9     |
| Glyco_hydro_63                                       | Q80UM7                                                                       | Mannosyl-oligosaccharide glucosidase                  | Mogs        |
| FBA;F-box                                            | Q80UW2                                                                       | F-box only protein 2                                  | Fbxo2       |
| Inositol_P                                           | Q80V26                                                                       | Inositol monophosphatase 3                            | Impad1      |
| ENTH;UIM                                             | Q80VP1;Q80VP1-2                                                              | Epsin-1                                               | Epn1        |
| Aldehdh                                              | Q80VQ0;J3QMK6;E9Q3E1                                                         | Aldehyde dehydrogenase family 3 member B1             | Aldh3b1     |
| Peptidase_M48                                        | Q80W54                                                                       | CAAX prenyl protease 1 homolog                        | Zmpste24    |
| DUF3733;LRR_4;LRR_8                                  | Q80WG5;Q8R502                                                                | Volume-regulated anion channel subunit LRRC8A         | Lrrc8a      |
| V-set;Xlink                                          | Q80WM4                                                                       | Hyaluronan and proteoglycan link protein 4            | Hapln4      |
| PIP5K                                                | Q80XI4                                                                       | Phosphatidylinositol 5-phosphate 4-kinase type-2 beta | Pip4k2b     |
| adh_short                                            | Q80XN0                                                                       | D-beta-hydroxybutyrate dehydrogenase, mitochondrial   | Bdh1        |
| I-set                                                | Q80Z24                                                                       | Neuronal growth regulator 1                           | Negr1       |
| Ras                                                  | Q80ZJ1;Q8BU31;Q80ZJ1-2                                                       | Ras-related protein Rap-2a;Ras-related protein Rap-2c | Rap2a;Rap2c |
|                                                      | Q80ZW2                                                                       | Protein THEM6                                         | Them6       |
| Bravo_FIGEY;fn3;I-set                                | Q810U3                                                                       | Neurofascin                                           | Nfasc       |
| Bravo_FIGEY;fn3;I-set                                | Q810U4;Q810U4-3;Q810U4-2;Q810U4-4                                            | Neuronal cell adhesion molecule                       | Nrcam       |
| Guanylate_kin;L27_1;MAGUK_N_PEST;PDZ;PDZ_assoc;SH3_1 | Q811D0;Q811D0-2;Q811D0-3;P70175                                              | Disks large homolog 1                                 | Dlg1        |
| GTP_EFTU;GTP_EFTU_D2;GTP_EFTU_D3                     | Q8BFR5;Q8BFR5-2                                                              | Elongation factor Tu, mitochondrial                   | Tufm        |
| EF-hand_7                                            | Q8BFY6                                                                       | Peflin                                                | Pef1        |
| Band_7                                               | Q8BFZ9                                                                       | Erlin-2                                               | Erlin2      |
| MFS_1;Pentapeptide_4;Sugar_tr                        | Q8BG39                                                                       | Synaptic vesicle glycoprotein 2B                      | Sv2b        |
| HAD_2                                                | Q8BGB7;Q8BGB7-2                                                              | Enolase-phosphatase E1                                | Enoph1      |
| Carn_acyltransf                                      | Q8BGD5                                                                       | Carnitine O-palmitoyltransferase 1, brain isoform     | Cpt1c       |

# SUPPLEMENTARY DATA

|                                |                                 |                                                                                   |             |
|--------------------------------|---------------------------------|-----------------------------------------------------------------------------------|-------------|
| Bac_surface_Ag                 | Q8BGH2                          | Sorting and assembly machinery component 50 homolog                               | Samm50      |
| Phosphodiester                 | Q8BGN3                          | Ectonucleotide pyrophosphatase/phosphodiesterase family member 6                  | Enpp6       |
| MARVEL                         | Q8BGN8-2;Q8BGN8                 | Synaptoporin                                                                      | Synpr       |
| DHHA1;tRNA_SAD;tRNA-synt_2c    | Q8BGQ7                          | Alanine--tRNA ligase, cytoplasmic                                                 | Aars        |
| CDP-OH_P_transf                | Q8BGS7;Q8BGS7-2                 | Choline/ethanolaminephosphotransferase 1                                          | Cept1       |
| fn3                            | Q8BGT8;Q8BGT8-2                 | Phytanoyl-CoA hydroxylase-interacting protein-like                                | Phyhipl     |
| Cyclin_N                       | Q8BGU5;Q8BGU5-2                 | Cyclin-Y                                                                          | Ccny        |
| EF-hand_1;EF-hand_7            | Q8BGZ1                          | Hippocalcin-like protein 4                                                        | Hpcal4      |
| EMP70                          | Q8BH24                          | Transmembrane 9 superfamily member 4                                              | Tm9sf4      |
| EF-hand_6;Mito_carr            | Q8BH59                          | Calcium-binding mitochondrial carrier protein Aralar1                             | Slc25a12    |
| ECH                            | Q8BH95                          | Enoyl-CoA hydratase, mitochondrial                                                | Echs1       |
| BNIP2;CRAL_TRIO_2              | Q8BHE3;O54940                   | Caytaxin;BCL2/adenovirus E1B 19 kDa protein-interacting protein 2                 | Atcay;Bnip2 |
|                                | Q8BHF7                          | CDP-diacylglycerol--glycerol-3-phosphate 3-phosphatidyltransferase, mitochondrial | Pgs1        |
| ELO                            | Q8BHI7                          | Elongation of very long chain fatty acids protein 5                               | Elov15      |
| V-set                          | Q8BHK2                          | Sodium channel subunit beta-3                                                     | Scn3b       |
| Gal_mutarotas_2;Glyco_hydro_31 | Q8BHN3;Q8BHN3-2;Q8BHN3-3        | Neutral alpha-glucosidase AB                                                      | Ganab       |
| SNF                            | Q8BJI1                          | Sodium-dependent neutral amino acid transporter SLC6A17                           | Slc6a17     |
| Tetraspannin                   | Q8BJU2                          | Tetraspanin-9                                                                     | Tspan9      |
| Aha1_N;AhsA1                   | Q8BK64                          | Activator of 90 kDa heat shock protein ATPase homolog 1                           | Ahsa1       |
| Lactamase_B                    | Q8BL86                          | Metallo-beta-lactamase domain-containing protein 2                                | Mblac2      |
| MFS_1                          | Q8BLE7                          | Vesicular glutamate transporter 2                                                 | Slc17a6     |
| Abhydrolase_3                  | Q8BLF1                          | Neutral cholesterol ester hydrolase 1                                             | Nceh1       |
| I-set                          | Q8BLK3                          | Limbic system-associated membrane protein                                         | Lsamp       |
| C2-set_2;I-set;V-set           | Q8BLQ9;Q8BLQ9-3;Q8BLQ9-2        | Cell adhesion molecule 2                                                          | Cadm2       |
| C2;Copine                      | Q8BLR2                          | Copine-4                                                                          | Cpne4       |
| HSP70                          | Q8BM72;Q8BM72-2                 | Heat shock 70 kDa protein 13                                                      | Hspa13      |
|                                | Q8BMK4                          | Cytoskeleton-associated protein 4                                                 | Ckap4       |
| EF-hand_1                      | Q8BNY6                          | Neuronal calcium sensor 1                                                         | Ncs1        |
| tRNA_anti-codon;tRNA-synt_2    | Q8BP47                          | Asparagine--tRNA ligase, cytoplasmic                                              | Nars        |
| EF-hand_5;EF-hand_7            | Q8BP92                          | Reticulocalbin-2                                                                  | Rcn2        |
| Rav1p_C;WD40                   | Q8BPN8;Q8BPN8-2;Q8BPN8-3;Q6PNC0 | DmX-like protein 2                                                                | Dmx12       |



# SUPPLEMENTARY DATA

|                                        |                          |                                                                                                                                       |          |
|----------------------------------------|--------------------------|---------------------------------------------------------------------------------------------------------------------------------------|----------|
| OST3_OST6;Thioredoxin                  | Q8BTV1                   | Tumor suppressor candidate 3                                                                                                          | Tusc3    |
| Band_3_cyto;HCO3_cotransp              | Q8BTY2;Q8BTY2-2          | Sodium bicarbonate cotransporter 3                                                                                                    | Slc4a7   |
| Sec62                                  | Q8BU14                   | Translocation protein SEC62                                                                                                           | Sec62    |
| TPP_enzyme_C;TPP_enzyme_M;TPP_enzyme_N | Q8BU33;Q8BU33-3;Q8BU33-2 | Acetolactate synthase-like protein                                                                                                    | Ilvbl    |
| MoCF_biosynth;MoeA_C;MoeA_N            | Q8BUV3                   | Gephyrin;Molybdopterin adenylyltransferase;Molybdop-<br>terin molybdenumtransferase                                                   | Gphn     |
| V-ATPase_H_C;V-ATPase_H_N              | Q8BVE3                   | V-type proton ATPase subunit H                                                                                                        | Atp6v1h  |
| Acetyltransf_1                         | Q8BVG8                   | N-acetyltransferase 14                                                                                                                | Nat14    |
| adh_short                              | Q8BVI4                   | Dihydropteridine reductase                                                                                                            | Qdpr     |
| Abhydrolase_6                          | Q8BVQ5                   | Protein phosphatase methylesterase 1                                                                                                  | Ppme1    |
| DUF563                                 | Q8BW41;Q8BW41-2          | Protein O-linked-mannose beta-1,4-N-acetylglucosaminyltransferase 2                                                                   | Pomgnt2  |
| Amino_oxidase                          | Q8BW75                   | Amine oxidase [flavin-containing] B                                                                                                   | Maob     |
| Aldedh                                 | Q8BWF0                   | Succinate-semialdehyde dehydrogenase, mitochondrial                                                                                   | Aldh5a1  |
| PITH                                   | Q8BWR2;Q8BWR2-2          | PITH domain-containing protein 1                                                                                                      | Pithd1   |
| Lung_7-TM_R                            | Q8BXN9;Q8BXN9-3;Q8BXN9-2 | Transmembrane protein 87A                                                                                                             | Tmem87a  |
| Gpi16                                  | Q8BXQ2                   | GPI transamidase component PIG-T                                                                                                      | Pigt     |
| AA_permease_2;AA_permease_C            | Q8BXR1                   | Probable cationic amino acid transporter                                                                                              | Slc7a14  |
|                                        | Q8BXV2                   | BRI3-binding protein                                                                                                                  | Bri3bp   |
| Thioredoxin                            | Q8BXZ1                   | Protein disulfide-isomerase TMX3                                                                                                      | Tmx3     |
| Choline_transpo                        | Q8BY89-2;Q8BY89          | Choline transporter-like protein 2                                                                                                    | Slc44a2  |
|                                        | Q8BYI8;Q8BYI8-2          | Uncharacterized protein KIAA1467                                                                                                      | Kiaa1467 |
| EGF_2;Fibrinogen_C;fn3                 | Q8BYI9;Q8BYI9-2          | Tenascin-R                                                                                                                            | Tnr      |
| COesterase                             | Q8BYM5                   | Neuroigin-3                                                                                                                           | Nlgn3    |
| Dynamin_M;GED;PH                       | Q8BZ98;Q8BZ98-2          | Dynamin-3                                                                                                                             | Dnm3     |
| Thioredoxin                            | Q8C0L0                   | Thioredoxin-related transmembrane protein 4                                                                                           | Tmx4     |
| Asparaginase_2                         | Q8C0M9                   | Isoaspartyl peptidase/L-asparaginase;Isoaspartyl peptidase/L-asparaginase alpha chain;Isoaspartyl peptidase/L-asparaginase beta chain | Asrgl1   |
| ERAP1_C;Peptidase_M1                   | Q8C129                   | Leucyl-cystinyl aminopeptidase                                                                                                        | Lnpep    |
| Septin                                 | Q8C1B7;Q8C1B7-3;Q8C1B7-2 | Septin-11                                                                                                                             | septin11 |
| 7tm_3                                  | Q8C419                   | Probable G-protein coupled receptor 158                                                                                               | Gpr158   |
|                                        | Q8C522                   | Endonuclease domain-containing 1 protein                                                                                              | Endod1   |
| LMBR1                                  | Q8C561;Q8C561-2;Q8C561-3 | LMBR1 domain-containing protein 2                                                                                                     | Lmbrd2   |
| Prenylcys_lyase                        | Q8C7K6                   | Prenylcysteine oxidase-like                                                                                                           | Pcyox11  |
| DUF1620                                | Q8C7X2;Q8C7X2-3          | ER membrane protein complex subunit 1                                                                                                 | Emc1     |

# SUPPLEMENTARY DATA

|                                             |                                                                                                                                                      |                                                                          |           |
|---------------------------------------------|------------------------------------------------------------------------------------------------------------------------------------------------------|--------------------------------------------------------------------------|-----------|
| E2_bind;ThiF;UBA_e1_thiolCys;UBACT          | Q8C878;Q8C878-2                                                                                                                                      | NEDD8-activating enzyme E1 catalytic subunit                             | Uba3      |
| Ank;Ank_2;Death;ZU5                         | Q8C8R3-2;Q8C8R3;Q8C8R3-4;Q8C8R3-5;Q8C8R3-3;Q8C8R3-7;Q8C8R3-8;Q8C8R3-6;Q02357-2;G5E8K5-6;G5E8K5-4;Q02357;G5E8K5-5;Q02357-5;Q02357-3;Q02357-4;Q02357-6 | Ankyrin-2                                                                | Ank2      |
| Shisa                                       | Q8CA71                                                                                                                                               | Protein shisa-4                                                          | Shisa4    |
| GAF;PDEase_I                                | Q8CA95-3;Q8CA95;Q8CA95-2;Q8CA95-4                                                                                                                    | cAMP and cAMP-inhibited cGMP 3,5-cyclic phosphodiesterase 10A            | Pde10a    |
| PGM_PMM_I;PGM_PMM_II;PGM_PMM_III;PGM_PMM_IV | Q8CAA7                                                                                                                                               | Glucose 1,6-bisphosphate synthase                                        | Pgm211    |
| Mitofilin                                   | Q8CAQ8;Q8CAQ8-2;Q8CAQ8-5;Q8CAQ8-3                                                                                                                    | MICOS complex subunit Mic60                                              | Immt      |
| Thiolase_C;Thiolase_N                       | Q8CAY6                                                                                                                                               | Acetyl-CoA acetyltransferase, cytosolic                                  | Acat2     |
| MFS_1;MFS_1_like                            | Q8CBH5-2;Q8CBH5                                                                                                                                      | Major facilitator superfamily domain-containing protein 6                | Mfsd6     |
|                                             | Q8CFV4                                                                                                                                               | Neuritin                                                                 | Nrn1      |
| G-alpha                                     | Q8CGK7                                                                                                                                               | Guanine nucleotide-binding protein G(olf) subunit alpha                  | Gnal      |
| DUF1866;Exo_endo_phos;Syja_N                | Q8CHC4                                                                                                                                               | Synaptojanin-1                                                           | Synj1     |
| Septin                                      | Q8CHH9;Q8CHH9-2                                                                                                                                      | Septin-8                                                                 | septin8   |
| MBOAT                                       | Q8CHK3                                                                                                                                               | Lysophospholipid acyltransferase 7                                       | Mboat7    |
| RhoGEF;SH3_1                                | Q8CHT1;Q8CHT1-2                                                                                                                                      | Ephexin-1                                                                | Ngef      |
| Phosphorylase                               | Q8CI94                                                                                                                                               | Glycogen phosphorylase, brain form                                       | Pygb      |
| V-set                                       | Q8HW98                                                                                                                                               | IgLON family member 5                                                    | Iglon5    |
| L27;PDZ                                     | Q8JZS0;O88951                                                                                                                                        | Protein lin-7 homolog A                                                  | Lin7a     |
| C2;Copine                                   | Q8JZW4                                                                                                                                               | Copine-5                                                                 | Cpne5     |
|                                             | Q8K0S0                                                                                                                                               | Phytanoyl-CoA hydroxylase-interacting protein                            | Phyhip    |
| Reticulon                                   | Q8K0T0                                                                                                                                               | Reticulon-1                                                              | Rtn1      |
|                                             | Q8K0U4                                                                                                                                               | Heat shock 70 kDa protein 12A                                            | Hspa12a   |
| REJ                                         | Q8K135;Q8K135-2                                                                                                                                      | Dyslexia-associated protein KIAA0319-like protein                        | Kiaa0319l |
| PfkB                                        | Q8K183                                                                                                                                               | Pyridoxal kinase                                                         | Pdkx      |
| Dynamin_M;GED                               | Q8K1M6;Q8K1M6-3;Q8K1M6-2;Q8K1M6-4;Q8K1M6-5                                                                                                           | Dynamin-1-like protein                                                   | Dnm1l     |
| FAD_binding_2;Succ_DH_flav_C                | Q8K2B3                                                                                                                                               | Succinate dehydrogenase [ubiquinone] flavoprotein subunit, mitochondrial | Sdha      |
| CS;PTPLA                                    | Q8K2C9                                                                                                                                               | Very-long-chain (3R)-3-hydroxyacyl-CoA dehydratase 3                     | Hacd3     |
| PIG-U                                       | Q8K358                                                                                                                                               | Phosphatidylinositol glycan anchor biosynthesis class U protein          | Pigu      |
| Fer4_7                                      | Q8K3J1                                                                                                                                               | NADH dehydrogenase [ubiquinone] iron-sulfur protein 8, mitochondrial     | Ndufs8    |
| Lgl_C;LLGL;WD40                             | Q8K400;Q8K400-2                                                                                                                                      | Syntaxin-binding protein 5                                               | Stxbp5    |
| EPTP;LRR_8                                  | Q8K406                                                                                                                                               | Leucine-rich repeat LGI family member 3                                  | Lgi3      |
| IP_trans                                    | Q8K4R4;Q8K4R4-3;Q8K4R4-2;Q8K4R4-4                                                                                                                    | Cytoplasmic phosphatidylinositol transfer protein 1                      | Pitpnc1   |

# SUPPLEMENTARY DATA

|                                                        |                                                              |                                                        |         |
|--------------------------------------------------------|--------------------------------------------------------------|--------------------------------------------------------|---------|
| EPTP;LRR_8                                             | Q8K4Z0-2;Q8K4Z0                                              | Leucine-rich repeat LGI family member 2                | Lgi2    |
| Calx-beta;Na_Ca_ex                                     | Q8K596;Q8K596-2                                              |                                                        | Slc8a2  |
| Thiolase_C;Thiolase_N                                  | Q8QZT1                                                       | Acetyl-CoA acetyltransferase, mitochondrial            | Acat1   |
| Tetraspannin                                           | Q8QZY6                                                       | Tetraspanin-14                                         | Tspan14 |
| Peptidase_C1_2                                         | Q8R016                                                       | Bleomycin hydrolase                                    | Blmh    |
| BEX                                                    | Q8R0A5                                                       | Transcription elongation factor A protein-like 3       | Tceal3  |
| Aldedh;Formyl_trans_C;Formyl_trans_N;PP-binding        | Q8R0Y6;Q8K009                                                | Cytosolic 10-formyltetrahydrofolate dehydrogenase      | Aldh1l1 |
| ERO1                                                   | Q8R180;Q8R2E9                                                | ERO1-like protein alpha                                | Ero1l   |
| MARVEL                                                 | Q8R191                                                       | Synaptogyrin-3                                         | Syng3   |
| UCR_UQCRX_QCR9                                         | Q8R1I1                                                       | Cytochrome b-c1 complex subunit 9                      | Uqcr10  |
| EMP24_GP25L                                            | Q8R1V4                                                       | Transmembrane emp24 domain-containing protein 4        | Tmed4   |
| V-set                                                  | Q8R366                                                       | Immunoglobulin superfamily member 8                    | Igsf8   |
| MBOAT                                                  | Q8R3I2;Q8R3I2-2;Q8R3I2-3                                     | Lysophospholipid acyltransferase 2                     | Mboat2  |
| BAR;SH3_9                                              | Q8R3V5;Q8R3V5-3;Q8R3V5-1                                     | Endophilin-B2                                          | Sh3glb2 |
| C2-set_2;V-set                                         | Q8R464                                                       | Cell adhesion molecule 4                               | Cadm4   |
| EGF_CA;UnbV_ASPIC                                      | Q8R555                                                       | Cartilage acidic protein 1                             | Crtac1  |
| Actin                                                  | Q8R5C5                                                       | Beta-centractin                                        | Actr1b  |
| C2-set_2;V-set                                         | Q8R5M8-4;Q8R5M8;Q8R5M8-3;Q8R5M8-2;Q8R5M8-5;Q8R5M8-7;Q8R5M8-6 | Cell adhesion molecule 1                               | Cadm1   |
| Thioredoxin                                            | Q8VBT0                                                       | Thioredoxin-related transmembrane protein 1            | Tmx1    |
| CLPTM1                                                 | Q8VBZ3                                                       | Cleft lip and palate transmembrane protein 1 homolog   | Clptm1  |
| Peptidase_M28                                          | Q8VCM8                                                       | Nicalin                                                | Ncln    |
| ADP_PFK_GK                                             | Q8VDL4;Q8VDL4-3;Q8VDL4-2                                     | ADP-dependent glucokinase                              | Adpgk   |
| Cation_ATPase_C;Cation_ATPase_N;E1-E2_ATPase;Hydrolase | Q8VDN2                                                       | Sodium/potassium-transporting ATPase subunit alpha-1   | Atp1a1  |
| CDP-OH_P_transf                                        | Q8VDP6                                                       | CDP-diacylglycerol--inositol 3-phosphatidyltransferase | Cdipt   |
| SIR2                                                   | Q8VDQ8;Q8VDQ8-2;Q8VDQ8-4;Q8VDQ8-3                            | NAD-dependent protein deacetylase sirtuin-2            | Sirt2   |
| Arf                                                    | Q8VEH3                                                       | ADP-ribosylation factor-like protein 8A                | Arl8a   |
| PRKCSH                                                 | Q8VEH8                                                       | Endoplasmic reticulum lectin 1                         | Erlec1  |
| CDC50                                                  | Q8VEK0;Q8BHG3                                                | Cell cycle control protein 50A                         | Tmem30a |
| Mito_carr                                              | Q8VEM8                                                       | Phosphate carrier protein, mitochondrial               | Slc25a3 |
| O-FucT                                                 | Q8VHI3                                                       | GDP-fucose protein O-fucosyltransferase 2              | Pofut2  |
| UT                                                     | Q8VHL0;Q8VHL0-2                                              | Urea transporter 1                                     | Slc14a1 |
| PMP22_Claudin                                          | Q8VHW2                                                       | Voltage-dependent calcium channel gamma-8 subunit      | Cacng8  |
| 4HBT                                                   | Q91V12-2;Q91V12;Q91V12-4;Q91V12-3                            | Cytosolic acyl coenzyme A thioester hydrolase          | Acot7   |
| AA_permease                                            | Q91V14;Q91V14-2                                              | Solute carrier family 12 member 5                      | Slc12a5 |

# SUPPLEMENTARY DATA

|                                                 |                                                                       |                                                                                                                                                                   |          |
|-------------------------------------------------|-----------------------------------------------------------------------|-------------------------------------------------------------------------------------------------------------------------------------------------------------------|----------|
| ATP-synt_C                                      | Q91V37                                                                | V-type proton ATPase 21 kDa proteolipid subunit                                                                                                                   | Atp6v0b  |
| Ras                                             | Q91V41                                                                | Ras-related protein Rab-14                                                                                                                                        | Rab14    |
| Mtc                                             | Q91V61;Q91V61-2                                                       | Sideroflexin-3                                                                                                                                                    | Sfxn3    |
| ATP-grasp_2;Citrate_synt;CoA_binding;Ligase_CoA | Q91V92                                                                | ATP-citrate synthase                                                                                                                                              | Acly     |
| DUF1982;Molybdopterin;NADH-G_4Fe-4S_3           | Q91VD9                                                                | NADH-ubiquinone oxidoreductase 75 kDa subunit, mitochondrial                                                                                                      | Ndufs1   |
| AMP-binding;AMP-binding_C                       | Q91VE0                                                                | Long-chain fatty acid transport protein 4                                                                                                                         | Slc27a4  |
| BRICHOS                                         | Q91VK4                                                                | Integral membrane protein 2C;CT-BRI3                                                                                                                              | Itm2c    |
| Pyrophosphatase                                 | Q91VM9;Q91VM9-2                                                       | Inorganic pyrophosphatase 2, mitochondrial                                                                                                                        | Ppa2     |
| ATP-synt                                        | Q91VR2                                                                | ATP synthase subunit gamma, mitochondrial                                                                                                                         | Atp5c1   |
| Atg8                                            | Q91VR7                                                                | Microtubule-associated proteins 1A/1B light chain 3A                                                                                                              | Map1lc3a |
|                                                 | Q91VU0                                                                | Protein FAM3C                                                                                                                                                     | Fam3c    |
| Erf4                                            | Q91W53;Q91W53-2                                                       | Golgin subfamily A member 7                                                                                                                                       | Golga7   |
| Thioredoxin                                     | Q91W90                                                                | Thioredoxin domain-containing protein 5                                                                                                                           | Txndc5   |
| Hist_deacetyl                                   | Q91WA3                                                                | Histone deacetylase 11                                                                                                                                            | Hdac11   |
| Complex1_49kDa                                  | Q91WD5                                                                | NADH dehydrogenase [ubiquinone] iron-sulfur protein 2, mitochondrial                                                                                              | Ndufs2   |
| tRNA_bind;tRNA-synt_1b                          | Q91WQ3                                                                | Tyrosine--tRNA ligase, cytoplasmic;Tyrosine--tRNA ligase, cytoplasmic, N-terminally processed                                                                     | Yars     |
| MitoNEET_N;zf-CDGSH                             | Q91WS0                                                                | CDGSH iron-sulfur domain-containing protein 1                                                                                                                     | Cisd1    |
| Band_7                                          | Q91X78                                                                | Erlin-1                                                                                                                                                           | Erlin1   |
| EF-hand_1;EF-hand_7                             | Q91X97                                                                | Neurocalcin-delta                                                                                                                                                 | Ncald    |
| DUF3456;EGF_CA                                  | Q91XD7                                                                | Cysteine-rich with EGF-like domain protein 1                                                                                                                      | Creld1   |
| ATP_synt_H                                      | Q91XE7                                                                | V-type proton ATPase subunit e 2                                                                                                                                  | Atp6v0e2 |
| Guanylate_kin;MAGUK_N_PEST;PDZ;PDZ_ass oc;SH3_1 | Q91XM9;Q91XM9-3;Q91XM9-6;Q91XM9-8;Q91XM9-2;Q91XM9-4;Q91XM9-7;Q91XM9-5 | Disks large homolog 2                                                                                                                                             | Dlg2     |
| BASP1                                           | Q91XV3                                                                | Brain acid soluble protein 1                                                                                                                                      | Basp1    |
| Ribophorin_I                                    | Q91YQ5                                                                | Dolichyl-diphosphooligosaccharide--protein glycosyltransferase subunit 1                                                                                          | Rpn1     |
| Complex1_51K;NADH_4Fe-4S;SLBB                   | Q91YT0                                                                | NADH dehydrogenase [ubiquinone] flavoprotein 1, mitochondrial                                                                                                     | Ndufv1   |
| DnaJ;TPR_1                                      | Q91YW3                                                                | DnaJ homolog subfamily C member 3                                                                                                                                 | Dnajc3   |
| 2-Hacid_dh;2-Hacid_dh_C                         | Q91Z53                                                                | Glyoxylate reductase/hydroxypyruvate reductase                                                                                                                    | Grhpr    |
| UDPGP                                           | Q91ZJ5;Q91ZJ5-2                                                       | UTP--glucose-1-phosphate uridylyltransferase                                                                                                                      | Ugp2     |
| EGF_CA;Ldl_recept_a;Ldl_recept_b                | Q91ZX7                                                                | Pro-low-density lipoprotein receptor-related protein 1;Low-density lipoprotein receptor-related protein 1 85 kDa subunit;Low-density lipoprotein receptor-related | Lrp1     |

# SUPPLEMENTARY DATA

|                           |                                     |                                                                                                             |         |
|---------------------------|-------------------------------------|-------------------------------------------------------------------------------------------------------------|---------|
|                           |                                     | protein 1 515 kDa subunit;Low-density lipoprotein receptor-related protein 1 intracellular domain           |         |
| Synuclein                 | Q91ZZ3;Q9Z0F7                       | Beta-synuclein                                                                                              | Sncb    |
| ETF_QO                    | Q921G7                              | Electron transfer flavoprotein-ubiquinone oxidoreductase, mitochondrial                                     | Etfdh   |
| Transferrin               | Q921I1;Q9DBD0;CON_Q29443;CON_Q0IIK2 | Serotransferrin                                                                                             | Tf      |
| Ras                       | Q921J2                              | GTP-binding protein Rheb                                                                                    | Rheb    |
| DUF1394                   | Q921M7                              | Protein FAM49B                                                                                              | Fam49b  |
| Tetraspanin               | Q922J6                              | Tetraspanin-2                                                                                               | Tspan2  |
| Glyco_hydro_18            | Q922Q9;Q922Q9-2                     | Chitinase domain-containing protein 1                                                                       | Chid1   |
| Thioredoxin               | Q922R8                              | Protein disulfide-isomerase A6                                                                              | Pdia6   |
| GAF;PDEase_I              | Q922S4;Q922S4-2;Q922S4-3            | cGMP-dependent 3,5-cyclic phosphodiesterase                                                                 | Pde2a   |
| CaMKII_AD;Pkinase         | Q923T9;Q923T9-3;Q923T9-2            | Calcium/calmodulin-dependent protein kinase type II subunit gamma                                           | Camk2g  |
| AA_permease;KCl_Cotrans_1 | Q924N4;Q924N4-2                     | Solute carrier family 12 member 6                                                                           | Slc12a6 |
| Mtc                       | Q925N0                              | Sideroflexin-5                                                                                              | Sfxn5   |
| Transaldolase             | Q93092                              | Transaldolase                                                                                               | Taldo1  |
| adh_short                 | Q99J47;Q99J47-2                     | Dehydrogenase/reductase SDR family member 7B                                                                | Dhrs7b  |
| Pentaxin                  | Q99J85                              | Neuronal pentraxin receptor                                                                                 | Nptxr   |
| 7tm_1                     | Q99JG2                              | Prosaposin receptor GPR37L1                                                                                 | Gpr37l1 |
| ER_lumen_recept           | Q99JH8;Q9CQM2;Q8R1L4                | ER lumen protein-retaining receptor 1                                                                       | Kdelr1  |
| Ras                       | Q99JI6                              | Ras-related protein Rap-1b                                                                                  | Rap1b   |
| G_glu_transpept           | Q99JP7                              | Gamma-glutamyltransferase 7;Gamma-glutamyltransferase 7 heavy chain;Gamma-glutamyltransferase 7 light chain | Ggt7    |
| Mtc                       | Q99JR1                              | Sideroflexin-1                                                                                              | Sfxn1   |
| PAP2                      | Q99JY8                              | Lipid phosphate phosphohydrolase 3                                                                          | Ppap2b  |
| Actin                     | Q99JY9                              | Actin-related protein 3                                                                                     | Actr3   |
| CH;EF-hand_7              | Q99K51;Q61233;Q3V0K9                | Plastin-3                                                                                                   | Pls3    |
| Aminotran_5               | Q99K85                              | Phosphoserine aminotransferase                                                                              | Psat1   |
| Lactamase_B               | Q99KB8;Q99KB8-2                     | Hydroxyacylglutathione hydrolase, mitochondrial                                                             | Hagh    |
| EMP24_GP25L               | Q99KF1                              | Transmembrane emp24 domain-containing protein 9                                                             | Tmed9   |
| Aconitase;Aconitase_C     | Q99KI0                              | Aconitate hydratase, mitochondrial                                                                          | Aco2    |
|                           | Q99KJ8                              | Dynactin subunit 2                                                                                          | Dctn2   |
| CTDII;DnaJ                | Q99KV1                              | DnaJ homolog subfamily B member 11                                                                          | Dnajb11 |
|                           | Q99KW9                              | T-cell immunomodulatory protein                                                                             | Itfg1   |
| CTP_transf_1              | Q99L43                              | Phosphatidate cytidyltransferase 2                                                                          | Cds2    |

# SUPPLEMENTARY DATA

|                               |                          |                                                                                                                                     |         |
|-------------------------------|--------------------------|-------------------------------------------------------------------------------------------------------------------------------------|---------|
| TPR_2                         | Q99L47                   | Hsc70-interacting protein                                                                                                           | St13    |
| dNK                           | Q99LC3                   | NADH dehydrogenase [ubiquinone] 1 alpha subcomplex subunit 10, mitochondrial                                                        | Ndufa10 |
| ETF;ETF_alpha                 | Q99LC5                   | Electron transfer flavoprotein subunit alpha, mitochondrial                                                                         | Etfa    |
| PSS                           | Q99LH2                   | Phosphatidylserine synthase 1                                                                                                       | Ptdss1  |
| Abhydrolase_5                 | Q99LR1;Q99LR1-2          | Monoacylglycerol lipase ABHD12                                                                                                      | Abhd12  |
| DJ-1_PfpI                     | Q99LX0                   | Protein deglycase DJ-1                                                                                                              | Park7   |
| Ndufs5                        | Q99LY9                   | NADH dehydrogenase [ubiquinone] iron-sulfur protein 5;NADH dehydrogenase [ubiquinone] iron-sulfur protein 5, N-terminally processed | Ndufs5  |
| Ependymin                     | Q99M71;Q99M71-2          | Mammalian ependymin-related protein 1                                                                                               | Epdr1   |
| C2-set_2;V-set                | Q99N28                   | Cell adhesion molecule 3                                                                                                            | Cadm3   |
| Reticulon                     | Q99P72-1;Q99P72-4        | Reticulon-4                                                                                                                         | Rtn4    |
| I-set                         | Q99PJ0                   | Neurotrimin                                                                                                                         | Ntm     |
| Rho_GDI                       | Q99PT1                   | Rho GDP-dissociation inhibitor 1                                                                                                    | Arhgdia |
| ETC_C1_NDUFA5                 | Q9CPP6                   | NADH dehydrogenase [ubiquinone] 1 alpha subcomplex subunit 5                                                                        | Ndufa5  |
| COX6C                         | Q9CPQ1                   | Cytochrome c oxidase subunit 6C                                                                                                     | Cox6c   |
| ATP-synt_G                    | Q9CPQ8                   | ATP synthase subunit g, mitochondrial                                                                                               | Atp5l   |
|                               | Q9CPS6                   | Histidine triad nucleotide-binding protein 3                                                                                        | Hint3   |
| UPF0556                       | Q9CPT4                   | Myeloid-derived growth factor                                                                                                       | Mydgf   |
| Glyoxalase                    | Q9CPU0                   | Lactoylglutathione lyase                                                                                                            | Glo1    |
| MAPEG                         | Q9CPU4                   | Microsomal glutathione S-transferase 3                                                                                              | Mgst3   |
| Glyoxalase_2                  | Q9CPV4;Q9CPV4-2;Q9CPV4-3 | Glyoxalase domain-containing protein 4                                                                                              | Glod4   |
| EGF;F5_F8_type_C;Laminin_G_2  | Q9CPW0                   | Contactin-associated protein-like 2                                                                                                 | Cntnap2 |
| Peptidase_M17;Peptidase_M17_N | Q9CPY7;Q9CPY7-2          | Cytosol aminopeptidase                                                                                                              | Lap3    |
| NDUF_C2                       | Q9CQ54                   | NADH dehydrogenase [ubiquinone] 1 subunit C2                                                                                        | Ndufc2  |
| UcrQ                          | Q9CQ69                   | Cytochrome b-c1 complex subunit 8                                                                                                   | Uqcrc   |
| L51_S25_CI-B8                 | Q9CQ75                   | NADH dehydrogenase [ubiquinone] 1 alpha subcomplex subunit 2                                                                        | Ndufa2  |
| Fer2_3                        | Q9CQA3                   | Succinate dehydrogenase [ubiquinone] iron-sulfur subunit, mitochondrial                                                             | Sdhb    |
| MitoNEET_N;zf-CDGSH           | Q9CQB5                   | CDGSH iron-sulfur domain-containing protein 2                                                                                       | Cisd2   |
| NDUF_B4                       | Q9CQC7                   | NADH dehydrogenase [ubiquinone] 1 beta subcomplex subunit 4                                                                         | Ndufb4  |
| Ras                           | Q9CQD1                   | Ras-related protein Rab-5A                                                                                                          | Rab5a   |
| Prenylcys_lyase               | Q9CQF9                   | Prenylcysteine oxidase                                                                                                              | Pcyox1  |

# SUPPLEMENTARY DATA

|                               |                                                            |                                                                                          |          |
|-------------------------------|------------------------------------------------------------|------------------------------------------------------------------------------------------|----------|
| NDUF_B5                       | Q9CQH3                                                     | NADH dehydrogenase [ubiquinone] 1 beta subcomplex subunit 5, mitochondrial               | Ndufb5   |
| Cofilin_ADF                   | Q9CQI3;Q9ERL7                                              | Glia maturation factor beta                                                              | Gmfb     |
| Cofilin_ADF                   | Q9CQI6                                                     | Coactosin-like protein                                                                   | Cotl1    |
| Complex1_LYR                  | Q9CQJ8                                                     | NADH dehydrogenase [ubiquinone] 1 beta subcomplex subunit 9                              | Ndufb9   |
| Mt_ATP-synt_B                 | Q9CQQ7                                                     | ATP synthase F(0) complex subunit B1, mitochondrial                                      | Atp5f1   |
| 4HBT                          | Q9CQR4                                                     | Acyl-coenzyme A thioesterase 13;Acyl-coenzyme A thioesterase 13, N-terminally processed  | Acot13   |
| Atg8                          | Q9CQV6                                                     | Microtubule-associated proteins 1A/1B light chain 3B                                     | Map1lc3b |
| 14/3/2003                     | Q9CQV8;Q9CQV8-2                                            | 14-3-3 protein beta/alpha;14-3-3 protein beta/alpha, N-terminally processed              | Ywhab    |
| Arf                           | Q9CQW2                                                     | ADP-ribosylation factor-like protein 8B                                                  | Arl8b    |
| Claudin_2                     | Q9CQX5                                                     | Claudin domain-containing protein 1                                                      | Cldnd1   |
| Complex1_LYR                  | Q9CQZ5                                                     | NADH dehydrogenase [ubiquinone] 1 alpha subcomplex subunit 6                             | Ndufa6   |
| NDUF_B12                      | Q9CQZ6                                                     | NADH dehydrogenase [ubiquinone] 1 beta subcomplex subunit 3                              | Ndufb3   |
| Pro_isomerase;TPR_7           | Q9CR16                                                     | Peptidyl-prolyl cis-trans isomerase D                                                    | Ppid     |
| NDUF_B7                       | Q9CR61                                                     | NADH dehydrogenase [ubiquinone] 1 beta subcomplex subunit 7                              | Ndufb7   |
| Mito_carr                     | Q9CR62                                                     | Mitochondrial 2-oxoglutarate/malate carrier protein                                      | Slc25a11 |
| DUF1242                       | Q9CR64;Q9CR64-2                                            | Protein kish-A                                                                           | Tmem167a |
| UPF0121                       | Q9CR67                                                     | Transmembrane protein 33                                                                 | Tmem33   |
| Rieske;Ubiq-Cytc-red_N;UCR_TM | Q9CR68                                                     | Cytochrome b-c1 complex subunit Rieske, mitochondrial;Cytochrome b-c1 complex subunit 11 | Uqcrcs1  |
| COPIIcoated_ERV               | Q9CR89;Q9CR89-2                                            | Endoplasmic reticulum-Golgi intermediate compartment protein 2                           | Ergic2   |
| p25-alpha                     | Q9CRB6                                                     | Tubulin polymerization-promoting protein family member 3                                 | Tppp3    |
| TPR_2                         | Q9CRD2                                                     | ER membrane protein complex subunit 2                                                    | Emc2     |
| GDPD                          | Q9CRY7                                                     | Glycerophosphodiester phosphodiesterase domain-containing protein 1                      | Gdpd1    |
| Laminin_G_2;Syndecan          | Q9CS84;Q9CS84-4;Q9CS84-3;Q9CS84-2;Q9CS84-5;P0DI97;Q9CS84-6 | Neurexin-1                                                                               | Nrxn1    |
| P34-Arc                       | Q9CVB6                                                     | Actin-related protein 2/3 complex subunit 2                                              | Arpc2    |
| Amidinotransf                 | Q9CWS0                                                     | N(G),N(G)-dimethylarginine dimethylaminohydrolase 1                                      | Ddah1    |
|                               | Q9CWZ7                                                     | Gamma-soluble NSF attachment protein                                                     | Napg     |
| EMP24_GP25L                   | Q9CXE7                                                     | Transmembrane emp24 domain-containing protein 5                                          | Tmed5    |

# SUPPLEMENTARY DATA

|                                             |                             |                                                                                     |               |
|---------------------------------------------|-----------------------------|-------------------------------------------------------------------------------------|---------------|
| Armet                                       | Q9CXI5                      | Mesencephalic astrocyte-derived neurotrophic factor                                 | Manf          |
| Peptidase_C13                               | Q9CXY9                      | GPI-anchor transamidase                                                             | Pigk          |
| Steroid_dh                                  | Q9CY27                      | Very-long-chain enoyl-CoA reductase                                                 | Tecr          |
| TRAP_alpha                                  | Q9CY50                      | Translocon-associated protein subunit alpha                                         | Ssr1          |
|                                             | Q9CYH2                      | Redox-regulatory protein FAM213A                                                    | Fam213a       |
| SPC25                                       | Q9CYN2                      | Signal peptidase complex subunit 2                                                  | Spes2         |
| Renin_r                                     | Q9CYN9                      | Renin receptor                                                                      | Atp6ap2       |
| CAP_C;CAP_N                                 | Q9CYT6                      | Adenylyl cyclase-associated protein 2                                               | Cap2          |
| Peptidase_M16;Peptidase_M16_C               | Q9CZ13;Q9CXT8               | Cytochrome b-c1 complex subunit 1, mitochondrial                                    | Uqcrc1        |
| MMR_HSR1;YchF-GTPase_C                      | Q9CZ30;Q9CZ30-2             | Obg-like ATPase 1                                                                   | Ola1          |
| SEP;UBX                                     | Q9CZ44;Q9CZ44-3;Q9CZ44-2    | NSFL1 cofactor p47                                                                  | Nsfl1c        |
| Sdh_cyt                                     | Q9CZB0                      | Succinate dehydrogenase cytochrome b560 subunit, mitochondrial                      | Sdhc          |
| Peptidase_C69                               | Q9CZC8                      | Secernin-1                                                                          | Scrn1         |
| Porin_3                                     | Q9CZR3                      | Mitochondrial import receptor subunit TOM40B                                        | Tomm40l       |
| Citrate_synt                                | Q9CZU6                      | Citrate synthase, mitochondrial                                                     | Cs            |
| UQ_con                                      | Q9CZY3;Q9D2M8-2;Q9CZY3-2    | Ubiquitin-conjugating enzyme E2 variant 1;Ubiquitin-conjugating enzyme E2 variant 2 | Ube2v1;Ube2v2 |
| MPC                                         | Q9D023                      | Mitochondrial pyruvate carrier 2                                                    | Mpc2          |
| Lectin_leg-like                             | Q9D0F3                      | Protein ERGIC-53                                                                    | Lman1         |
| PGM_PMM_I;PGM_PMM_II;PGM_PMM_III;PGM_PMM_IV | Q9D0F9                      | Phosphoglucomutase-1                                                                | Pgm1          |
| CoA_trans                                   | Q9D0K2                      | Succinyl-CoA:3-ketoacid coenzyme A transferase 1, mitochondrial                     | Oxct1         |
| Cytochrom_C1                                | Q9D0M3;Q9D0M3-2             | Cytochrome c1, heme protein, mitochondrial                                          | Cyc1          |
| Dynein_light                                | Q9D0M5                      | Dynein light chain 2, cytoplasmic                                                   | Dynll2        |
| Serpin                                      | Q9D154;Q8VHP7;Q5SV42;Q9JK88 | Leukocyte elastase inhibitor A                                                      | Serpinb1a     |
| ATP1G1_PLM_MAT8                             | Q9D164-2;Q9D164             | FXYD domain-containing ion transport regulator 6                                    | Fxyd6         |
| DJ-1_PfpI                                   | Q9D172                      | ES1 protein homolog, mitochondrial                                                  | D10Jhu81e     |
| M20_dimer;Peptidase_M20                     | Q9D1A2                      | Cytosolic non-specific dipeptidase                                                  | Cndp2         |
| EMP24_GP25L                                 | Q9D1D4;Q9D1D4-2             | Transmembrane emp24 domain-containing protein 10                                    | Tmed10        |
| Ras                                         | Q9D1G1                      | Ras-related protein Rab-1B                                                          | Rab1b         |
| MBOAT                                       | Q9D1G3                      | Protein-cysteine N-palmitoyltransferase HHAT-like protein                           | Hhatl         |
| LRR_1;LRR_8                                 | Q9D1G5                      | Leucine-rich repeat-containing protein 57                                           | Lrrc57        |
| ATP-synt_F                                  | Q9D1K2                      | V-type proton ATPase subunit F                                                      | Atp6v1f       |
| DPM3                                        | Q9D1Q4                      | Dolichol-phosphate mannosyltransferase subunit 3                                    | Dpm3          |
| Thioredoxin                                 | Q9D1Q6                      | Endoplasmic reticulum resident protein 44                                           | Erp44         |



# SUPPLEMENTARY DATA

|                               |                          |                                                                                                                  |                   |
|-------------------------------|--------------------------|------------------------------------------------------------------------------------------------------------------|-------------------|
| I-set;LRR_1;LRR_8             | Q9D1T0                   | Leucine-rich repeat and immunoglobulin-like domain-containing nogo receptor-interacting protein 1                | Lingo1            |
| UPF0220                       | Q9D1X9                   | Transmembrane protein 50B                                                                                        | Tmem50b           |
| 2-oxoacid_dh;Biotin_lipoyl    | Q9D2G2;Q9D2G2-2          | Dihydrolipoyllysine-residue succinyltransferase component of 2-oxoglutarate dehydrogenase complex, mitochondrial | Dlst              |
| Abhydrolase_1;EHN             | Q9D379                   | Epoxide hydrolase 1                                                                                              | Ephx1             |
| Lamp                          | Q9D387                   | Lysosome-associated membrane glycoprotein 5                                                                      | Lamp5             |
| Tweety                        | Q9D3A9;Q9D3A9-4;Q9D3A9-5 | Protein tweety homolog 1                                                                                         | Ttyh1             |
| PTPLA                         | Q9D3B1                   | Very-long-chain (3R)-3-hydroxyacyl-CoA dehydratase 2                                                             | Hacd2             |
| Erf4                          | Q9D428                   | Golgin subfamily A member 7B                                                                                     | GOLGA7B           |
| Acyltransferase               | Q9D517                   | 1-acyl-sn-glycerol-3-phosphate acyltransferase gamma                                                             | Agpat3            |
| Neur_chan_LBD;Neur_chan_memb  | Q9D6F4                   | Gamma-aminobutyric acid receptor subunit alpha-4                                                                 | Gabra4            |
| Tubulin;Tubulin_C             | Q9D6F9                   | Tubulin beta-4A chain                                                                                            | Tubb4a            |
| NDUF_B8                       | Q9D6J5                   | NADH dehydrogenase [ubiquinone] 1 beta subcomplex subunit 8, mitochondrial                                       | Ndufb8            |
| Mito_carr                     | Q9D6M3;Q9DB41;Q9DB41-2   | Mitochondrial glutamate carrier 1;Mitochondrial glutamate carrier 2                                              | Slc25a22;Slc25a18 |
| Iso_dh                        | Q9D6R2;Q9D6R2-2          | Isocitrate dehydrogenase [NAD] subunit alpha, mitochondrial                                                      | Idh3a             |
| S_100                         | Q9D708                   |                                                                                                                  | S100a16           |
| Thioredoxin                   | Q9D710                   | Thioredoxin-related transmembrane protein 2                                                                      | Tmx2              |
| Pribosyl_synth;Pribosyltran_N | Q9D7G0;Q9CS42            | Ribose-phosphate pyrophosphokinase 1;Ribose-phosphate pyrophosphokinase 2                                        | Prps1;Prps2       |
| Str_synth                     | Q9D7N9                   | Adipocyte plasma membrane-associated protein                                                                     | Apmap             |
| DSPc                          | Q9D7X3                   | Dual specificity protein phosphatase 3                                                                           | Dusp3             |
| Pyrophosphatase               | Q9D819                   | Inorganic pyrophosphatase                                                                                        | Ppa1              |
| UCR_14kD                      | Q9D855                   | Cytochrome b-c1 complex subunit 7                                                                                | Uqcrb             |
| P16-Arc                       | Q9D898                   | Actin-related protein 2/3 complex subunit 5-like protein                                                         | Arpc51            |
| Far-17a_AIG1                  | Q9D8B1;Q9D8B1-1          | Androgen-induced gene 1 protein                                                                                  | Aig1              |
| Snf7                          | Q9D8B3;Q9D7F7            | Charged multivesicular body protein 4b                                                                           | Chmp4b            |
| Tim17                         | Q9D8B4                   | NADH dehydrogenase [ubiquinone] 1 alpha subcomplex subunit 11                                                    | Ndufa11           |
| I-set;V-set                   | Q9D8B7                   | Junctional adhesion molecule C                                                                                   | Jam3              |
| EF1G;GST_C;GST_N              | Q9D8N0                   | Elongation factor 1-gamma                                                                                        | Eef1g             |
| Peptidase_A22B                | Q9D8V0-4;Q9D8V0;Q9D8V0-3 | Minor histocompatibility antigen H13                                                                             | Hm13              |

# SUPPLEMENTARY DATA

|                                          |                          |                                                                                                                                |         |
|------------------------------------------|--------------------------|--------------------------------------------------------------------------------------------------------------------------------|---------|
| Peptidase_S24                            | Q9D8V7                   | Signal peptidase complex catalytic subunit SEC11C                                                                              | Sec11c  |
| PCI                                      | Q9D8W5                   | 26S proteasome non-ATPase regulatory subunit 12                                                                                | Psmc12  |
| EF-hand_7                                | Q9D8Y0;Q9D4J1            | EF-hand domain-containing protein D2                                                                                           | Efhd2   |
| Ocnus                                    | Q9DAK9                   | 14 kDa phosphohistidine phosphatase                                                                                            | Phpt1   |
| G-gamma                                  | Q9DAS9                   | Guanine nucleotide-binding protein G(I)/G(S)/G(O) subunit gamma-12                                                             | Gng12   |
|                                          | Q9DB05                   | Alpha-soluble NSF attachment protein                                                                                           | Napa    |
| OSCP                                     | Q9DB20                   | ATP synthase subunit O, mitochondrial                                                                                          | Atp5o   |
| BACK;BTB                                 | Q9DB72                   | BTB/POZ domain-containing protein 17                                                                                           | Btbd17  |
| Peptidase_M16;Peptidase_M16_C            | Q9DB77                   | Cytochrome b-c1 complex subunit 2, mitochondrial                                                                               | Uqcrc2  |
| Aldedh                                   | Q9DBF1;Q9DBF1-2          | Alpha-aminoadipic semialdehyde dehydrogenase                                                                                   | Aldh7a1 |
| Adaptin_N;Alpha_adaptinC2;B2-adapt-app_C | Q9DBG3;Q9DBG3-2          | AP-2 complex subunit beta                                                                                                      | Ap2b1   |
| Ribophorin_II                            | Q9DBG6                   | Dolichyl-diphosphooligosaccharide--protein glycosyltransferase subunit 2                                                       | Rpn2    |
| Lectin_leg-like                          | Q9DBH5                   | Vesicular integral-membrane protein VIP36                                                                                      | Lman2   |
| His_Phos_1                               | Q9DBJ1;O70250            | Phosphoglycerate mutase 1                                                                                                      | Pgam1   |
|                                          | Q9DBP5                   | UMP-CMP kinase                                                                                                                 | Cmpk1   |
| DUF1625                                  | Q9DBS1                   | Transmembrane protein 43                                                                                                       | Tmem43  |
| hSac2                                    | Q9DBS2                   | Tumor protein p63-regulated gene 1-like protein                                                                                | Tprg11  |
| AMOP;Somatomedin_B;Sushi;VWD             | Q9DBX3;Q9DBX3-3;Q9DBX3-2 | Sushi domain-containing protein 2                                                                                              | Susd2   |
| COPIIcoated_ERV                          | Q9DC16                   | Endoplasmic reticulum-Golgi intermediate compartment protein 1                                                                 | Ergic1  |
| DnaJ;Thioredoxin                         | Q9DC23                   | DnaJ homolog subfamily C member 10                                                                                             | Dnajc10 |
| G-alpha                                  | Q9DC51                   | Guanine nucleotide-binding protein G(k) subunit alpha                                                                          | Gnai3   |
| NmrA                                     | Q9DC69                   | NADH dehydrogenase [ubiquinone] 1 alpha subcomplex subunit 9, mitochondrial                                                    | Ndufa9  |
| Oxidored_q6                              | Q9DC70                   | NADH dehydrogenase [ubiquinone] iron-sulfur protein 7, mitochondrial                                                           | Ndufs7  |
| 6PGD;NAD_binding_2                       | Q9DCD0                   | 6-phosphogluconate dehydrogenase, decarboxylating                                                                              | Pgd     |
| CHCH                                     | Q9DCJ5                   | NADH dehydrogenase [ubiquinone] 1 alpha subcomplex subunit 8                                                                   | Ndufa8  |
| AIRC;SAICAR_synt                         | Q9DCL9                   | Multifunctional protein ADE2;Phosphoribosylaminoimidazole-succinocarboxamide synthase;Phosphoribosylaminoimidazole carboxylase | Paics   |
| Aa_trans                                 | Q9DCP2                   | Sodium-coupled neutral amino acid transporter 3                                                                                | Slc38a3 |
| NDUFB10                                  | Q9DCS9                   | NADH dehydrogenase [ubiquinone] 1 beta subcomplex subunit 10                                                                   | Ndufb10 |

# SUPPLEMENTARY DATA

|                                           |                                            |                                                                               |             |
|-------------------------------------------|--------------------------------------------|-------------------------------------------------------------------------------|-------------|
| Complex1_30kDa                            | Q9DCT2                                     | NADH dehydrogenase [ubiquinone] iron-sulfur protein 3, mitochondrial          | Ndufs3      |
| MIR                                       | Q9DCT5                                     | Stromal cell-derived factor 2                                                 | Sdf2        |
| Mt_ATP-synt_D                             | Q9DCX2                                     | ATP synthase subunit d, mitochondrial                                         | Atp5h       |
| ApoO                                      | Q9DCZ4;Q9DCZ4-2;Q9DCZ4-3                   | Apolipoprotein O                                                              | ApoO        |
| Tyr_Deacylase                             | Q9DD18;Q9DD18-2                            | D-tyrosyl-tRNA(Tyr) deacylase 1                                               | Dtd1        |
| DUF2012                                   | Q9EP72                                     | ER membrane protein complex subunit 7                                         | Emc7        |
| Beta-lactamase                            | Q9EP89                                     | Serine beta-lactamase-like protein LACTB, mitochondrial                       | Lactb       |
| Cadherin                                  | Q9EPL2;Q9EPL2-2                            | Calsyntenin-1;Soluble Alc-alpha;CTF1-alpha                                    | Clstn1      |
| Cse1;IBN_N                                | Q9EPL8                                     | Importin-7                                                                    | Ipo7        |
| PKD                                       | Q9EPR5                                     | VPS10 domain-containing receptor SorCS2                                       | Sorcs2      |
| adh_short                                 | Q9EQ06;Q9EQ06-2;Q8VCR2;Q8VCR2-2            | Estradiol 17-beta-dehydrogenase 11                                            | Hsd17b11    |
| Amidohydro_1                              | Q9EQF6                                     | Dihydropyrimidinase-related protein 5                                         | Dpysl5      |
| Phosphodiect                              | Q9EQG7                                     | Ectonucleotide pyrophosphatase/phosphodiect erase family member 5             | Enpp5       |
| Vps35                                     | Q9EQH3                                     | Vacuolar protein sorting-associated protein 35                                | Vps35       |
| NAP                                       | Q9EQU5;Q9EQU5-2                            | Protein SET                                                                   | Set         |
| SNARE                                     | Q9ER00                                     | Syntaxin-12                                                                   | Stx12       |
| Kazal_2;SPARC_Ca_bdg;Thyroglobulin_1      | Q9ER58                                     | Testican-2                                                                    | Spock2      |
| Tubulin;Tubulin_C                         | Q9ERD7                                     | Tubulin beta-3 chain                                                          | Tubb3       |
| Mesd                                      | Q9ERE7                                     | LDLR chaperone MESD                                                           | Mesdc2      |
| Sep15_SelM                                | Q9ERR7                                     | 15 kDa selenoprotein                                                          | Σεπ-15      |
| GRIM-19                                   | Q9ERS2                                     | NADH dehydrogenase [ubiquinone] 1 alpha subcomplex subunit 13                 | Ndufa13     |
| PTR2                                      | Q9ES07                                     | Solute carrier family 15 member 2                                             | Slc15a2     |
| Glyco_transf_64                           | Q9ES89                                     | Exostosin-like 2                                                              | Extl2       |
| Reticulon                                 | Q9ES97-3;Q9ES97;Q9ES97-4;Q9ES97-5;Q9ES97-2 | Reticulon-3                                                                   | Rtn3        |
| EMP70                                     | Q9ET30                                     | Transmembrane 9 superfamily member 3                                          | Tm9sf3      |
| AAA_5;AAA_8;DHC_N1;DHC_N2;Dynein_heavy;MT | Q9JHU4                                     | Cytoplasmic dynein 1 heavy chain 1                                            | Dync1h1     |
| Inos-1-P_synth;NAD_binding_5              | Q9JHU9                                     | Inositol-3-phosphate synthase 1                                               | Isyna1      |
| ANKH                                      | Q9JHZ2                                     | Progressive ankylosis protein                                                 | Ankh        |
| EPTP;LRR_8                                | Q9JIA1                                     | Leucine-rich glioma-inactivated protein 1                                     | Lgi1        |
| Methyltransf_31                           | Q9JIF0;Q9JIF0-3;Q9JIF0-2;Q6PAK3            | Protein arginine N-methyltransferase 1;Protein arginine N-methyltransferase 8 | Prmt1;Prmt8 |
| Aldo_ket_red                              | Q9JII6                                     | Alcohol dehydrogenase [NADP(+)]                                               | Akr1a1      |
| MFS_1;Pentapeptide_4;Sugar_tr             | Q9JIS5                                     | Synaptic vesicle glycoprotein 2A                                              | Sv2a        |
| Scramblase                                | Q9JIZ9                                     | Phospholipid scramblase 3                                                     | Plscr3      |

# SUPPLEMENTARY DATA

|                                                |                                            |                                                                                                   |             |
|------------------------------------------------|--------------------------------------------|---------------------------------------------------------------------------------------------------|-------------|
| Glyco_transf_7C;Glycos_transf_2;Ricin_B_lectin | Q9JJ61;Q8BVG5-2;Q8BVG5                     | Polypeptide N-acetylgalactosaminyltransferase 16                                                  | Galnt16     |
| MBOAT                                          | Q9JJJ7-4;Q9JJJ7-3;Q9JJJ7-2;Q9JJJ7;Q9JJJ7-5 | Protein-serine O-palmitoleoyltransferase porcupine                                                | Porcn       |
| LANC_like                                      | Q9JJK2                                     | LanC-like protein 2                                                                               | Lancl2      |
| Tmemb_9                                        | Q9JJR8                                     | Transmembrane protein 9B                                                                          | Tmem9b      |
| Profilin                                       | Q9JJV2;Q9JJV2-3;Q9JJV2-2                   | Profilin-2                                                                                        | Pfn2        |
| PMP22_Claudin                                  | Q9JJV5                                     | Voltage-dependent calcium channel gamma-3 subunit                                                 | Cacng3      |
| Exo_endo_phos                                  | Q9JJY3                                     | Sphingomyelin phosphodiesterase 3                                                                 | Smpd3       |
| Peptidase_C12                                  | Q9JKB1;P58321                              | Ubiquitin carboxyl-terminal hydrolase isozyme L3;Ubiquitin carboxyl-terminal hydrolase isozyme L4 | Uchl3;Uchl4 |
| SCAMP                                          | Q9JKD3                                     | Secretory carrier-associated membrane protein 5                                                   | Scamp5      |
| C2-set_2;V-set                                 | Q9JKF6                                     | Nectin-1                                                                                          | Pvr11       |
| Cation_efflux                                  | Q9JKN1                                     | Zinc transporter 7                                                                                | Slc30a7     |
| HSP70                                          | Q9JKR6                                     | Hypoxia up-regulated protein 1                                                                    | Hyou1       |
| Reticulon                                      | Q9JKW0                                     | ADP-ribosylation factor-like protein 6-interacting protein 1                                      | Arl6ip1     |
| GDPD                                           | Q9JL56                                     | Glycerophosphodiester phosphodiesterase 1                                                         | Gde1        |
| GLTP                                           | Q9JL62                                     | Glycolipid transfer protein                                                                       | Gltp        |
| Guanylate_kin;L27;PDZ;SH3_2                    | Q9JLB0;Q9JLB0-2                            | MAGUK p55 subfamily member 6                                                                      | Mpp6        |
| DCX;Pkinase                                    | Q9JLM8;Q9JLM8-2                            | Serine/threonine-protein kinase DCLK1                                                             | Dclk1       |
| Plug_translocon;SecY                           | Q9JLR1                                     | Protein transport protein Sec61 subunit alpha isoform 2                                           | Sec61a2     |
| Cullin;Cullin_Nedd8                            | Q9JLV5                                     | Cullin-3                                                                                          | Cul3        |
| ECH                                            | Q9JLZ3;Q9JLZ3-3;Q9JLZ3-2                   | Methylglutaconyl-CoA hydratase, mitochondrial                                                     | Auh         |
| NT5C                                           | Q9JM14                                     | 5(3)-deoxyribonucleotidase, cytosolic type                                                        | Nt5c        |
| P21-Arc                                        | Q9JM76                                     | Actin-related protein 2/3 complex subunit 3                                                       | Arpc3       |
| UCH                                            | Q9JMA1                                     | Ubiquitin carboxyl-terminal hydrolase 14                                                          | Usp14       |
| Adaptin_N;AP3B1_C                              | Q9JME5                                     | AP-3 complex subunit beta-2                                                                       | Ap3b2       |
| Pyr_redox;Pyr_redox_2;Pyr_redox_dim            | Q9JMH6;Q9JMH6-2                            | Thioredoxin reductase 1, cytoplasmic                                                              | Txnrd1      |
| Ras                                            | Q9QUI0;Q62159                              | Transforming protein RhoA;Rho-related GTP-binding protein RhoC                                    | Rhoa;Rhoc   |
| Proteasome;Proteasome_A_N                      | Q9QUM9                                     | Proteasome subunit alpha type-6                                                                   | Psm6        |
| V-set;Xlink                                    | Q9QUP5                                     | Hyaluronan and proteoglycan link protein 1                                                        | Hapln1      |
| Peptidase_S9;Peptidase_S9_N                    | Q9QUR6                                     | Prolyl endopeptidase                                                                              | Prep        |
| DUF3456                                        | Q9QXT0                                     | Protein canopy homolog 2                                                                          | Cnpy2       |
| ProSAAS                                        | Q9QXV0                                     | ProSAAS;KEP;Big SAAS;Little SAAS;Big PEN-LEN;PEN;PEN-20;PEN-19;Little LEN;Big LEN                 | Pcsk1n      |

# SUPPLEMENTARY DATA

|                                                                       |                                   |                                                                          |         |
|-----------------------------------------------------------------------|-----------------------------------|--------------------------------------------------------------------------|---------|
| AA_permease_2                                                         | Q9QXW9                            | Large neutral amino acids transporter small subunit 2                    | Slc7a8  |
|                                                                       | Q9QXY6;Q9WVK4                     | EH domain-containing protein 3                                           | Ehd3    |
| 7tm_1                                                                 | Q9QY42;Q9QY42-2;Q9QY42-3          | Prosaposin receptor GPR37                                                | Gpr37   |
| Porin_3                                                               | Q9QYA2                            | Mitochondrial import receptor subunit TOM40 homolog                      | Tomm40  |
| Ndr                                                                   | Q9QYF9                            | Protein NDRG3                                                            | Ndr3    |
| Ndr                                                                   | Q9QYG0;Q9QYG0-2                   | Protein NDRG2                                                            | Ndr2    |
|                                                                       | Q9QYR6;Q9QYR6-2                   | Microtubule-associated protein 1A;MAP1A heavy chain;MAP1 light chain LC2 | Map1a   |
| 7tm_3;ANF_receptor;NCD3G                                              | Q9QYS2                            | Metabotropic glutamate receptor 3                                        | Grm3    |
| C2;CUE                                                                | Q9QZ06                            | Toll-interacting protein                                                 | Tollip  |
| Metallophos_2                                                         | Q9QZ88;Q9QZ88-2                   | Vacuolar protein sorting-associated protein 29                           | Vps29   |
| Plexin_cytopl;PSI;TIG                                                 | Q9QZC2                            | Plexin-C1                                                                | Plxnc1  |
| Glypican                                                              | Q9QZF2                            | Glypican-1;Secreted glypican-1                                           | Gpc1    |
| Serinc                                                                | Q9QZI8                            | Serine incorporator 1                                                    | Serinc1 |
| UBA;ubiquitin                                                         | Q9QZM0                            | Ubiquilin-2                                                              | Ubqln2  |
| PALP                                                                  | Q9QZX7;Q9QZX7-2                   | Serine racemase                                                          | Srr     |
| ATP_Ca_trans_C;Cation_ATPase_C;Cation_ATPase_N;E1-E2_ATPase;Hydrolase | Q9R0K7                            | Plasma membrane calcium-transporting ATPase 2                            | Atp2b2  |
| C2                                                                    | Q9R0N3                            | Synaptotagmin-11                                                         | Syt11   |
| C2                                                                    | Q9R0N5                            | Synaptotagmin-5                                                          | Syt5    |
| C2                                                                    | Q9R0N7;Q9R0N7-3;Q9R0N7-2;Q9R0N7-4 | Synaptotagmin-7                                                          | Syt7    |
| C2                                                                    | Q9R0N8;Q9R0N8-2                   | Synaptotagmin-6                                                          | Syt6    |
| Esterase                                                              | Q9R0P3                            | S-formylglutathione hydrolase                                            | Esd     |
| Cofilin_ADF                                                           | Q9R0P5                            | Destrin                                                                  | Dstn    |
| Peptidase_S24                                                         | Q9R0P6                            | Signal peptidase complex catalytic subunit SEC11A                        | Sec11a  |
| Peptidase_C12                                                         | Q9R0P9                            | Ubiquitin carboxyl-terminal hydrolase isozyme L1                         | Uch11   |
| EMP24_GP25L                                                           | Q9R0Q3                            | Transmembrane emp24 domain-containing protein 2                          | Tmed2   |
| WD40                                                                  | Q9R0Q6;Q9WV32                     | Actin-related protein 2/3 complex subunit 1A                             | Arpc1a  |
| CS                                                                    | Q9R0Q7                            | Prostaglandin E synthase 3                                               | Ptges3  |
| PQ-loop                                                               | Q9R0Q9                            | Mannose-P-dolichol utilization defect 1 protein                          | Mpdu1   |
|                                                                       | Q9R0Y5;Q9R0Y5-2                   | Adenylate kinase isoenzyme 1                                             | Ak1     |
| Amidohydro_1                                                          | Q9R111                            | Guanine deaminase                                                        | Gda     |
| 3Beta_HSD                                                             | Q9R1J0                            | Sterol-4-alpha-carboxylate 3-dehydrogenase, decarboxylating              | Nsdhl   |
| Proteasome;Proteasome_A_N                                             | Q9R1P0                            | Proteasome subunit alpha type-4                                          | Psma4   |
| Proteasome                                                            | Q9R1P1                            | Proteasome subunit beta type-3                                           | Psm3    |
| Proteasome;Proteasome_A_N                                             | Q9R1P4                            | Proteasome subunit alpha type-1                                          | Psma1   |
| Calponin;CH                                                           | Q9R1Q8;Q9WVA4;P37804              | Transgelin-3                                                             | Tagln3  |

# SUPPLEMENTARY DATA

|                                                    |                                                                                                                                                                                                        |                                                                            |          |
|----------------------------------------------------|--------------------------------------------------------------------------------------------------------------------------------------------------------------------------------------------------------|----------------------------------------------------------------------------|----------|
| ATP-synt_S1                                        | Q9R1Q9                                                                                                                                                                                                 | V-type proton ATPase subunit S1                                            | Atp6ap1  |
| Septin                                             | Q9R1T4;Q9R1T4-2;Q9R1T4-3                                                                                                                                                                               | Septin-6                                                                   | Σεπ-06   |
| ADAM_CR;Disintegrin;Pep_M12B_propep;Repr<br>olysin | Q9R1V4                                                                                                                                                                                                 | Disintegrin and metalloproteinase domain-containing protein 11             | Adam11   |
| ADAM_CR;Disintegrin;Pep_M12B_propep;Repr<br>olysin | Q9R1V6;Q9R1V6-10;Q9R1V6-11;Q9R1V6-14;Q9R1V6-8;Q9R1V6-15;Q9R1V6-13;Q9R1V6-7;Q9R1V6-6;Q9R1V6-2;Q9R1V6-4;Q9R1V6-9;Q9R1V6-5;Q9R1V6-1;Q9R1V6-20;Q9R1V6-17;Q9R1V6-19;Q9R1V6-12;Q9R1V6-16;Q9R1V6-21;Q9R1V6-18 | Disintegrin and metalloproteinase domain-containing protein 22             | Adam22   |
| ADAM_CR;Disintegrin;Pep_M12B_propep;Repr<br>olysin | Q9R1V7;Q9R1V7-4;Q9R1V7-3;Q9R1V7-2                                                                                                                                                                      | Disintegrin and metalloproteinase domain-containing protein 23             | Adam23   |
| Gaa1                                               | Q9WTK3                                                                                                                                                                                                 | Glycosylphosphatidylinositol anchor attachment 1 protein                   | Gpaa1    |
| Ank_2;Ion_trans                                    | Q9WTR1                                                                                                                                                                                                 | Transient receptor potential cation channel subfamily V member 2           | Trpv2    |
| Cadherin;Cadherin_pro                              | Q9WTR5                                                                                                                                                                                                 | Cadherin-13                                                                | Cdh13    |
| AA_permease_2                                      | Q9WTR6                                                                                                                                                                                                 | Cystine/glutamate transporter                                              | Slc7a11  |
|                                                    | Q9WTT4                                                                                                                                                                                                 | V-type proton ATPase subunit G 2                                           | Atp6v1g2 |
| Skp1;Skp1_POZ                                      | Q9WTX5                                                                                                                                                                                                 | S-phase kinase-associated protein 1                                        | Skp1     |
| ALIX_LYPXL_bnd;BRO1                                | Q9WU78;Q9WU78-3;Q9WU78-2                                                                                                                                                                               | Programmed cell death 6-interacting protein                                | Pcdcd6ip |
| PFK                                                | Q9WUA3;Q9WUA3-2                                                                                                                                                                                        | ATP-dependent 6-phosphofructokinase, platelet type                         | Pfkip    |
| Phosphorylase                                      | Q9WUB3;Q9ET01                                                                                                                                                                                          | Glycogen phosphorylase, muscle form                                        | Pygm     |
| UPAR_LY6                                           | Q9WUC3                                                                                                                                                                                                 | Lymphocyte antigen 6H                                                      | Ly6h     |
| DUF1899;DUF1900;WD40                               | Q9WUM3                                                                                                                                                                                                 | Coronin-1B                                                                 | Coro1b   |
| DUF1899;DUF1900;WD40                               | Q9WUM4                                                                                                                                                                                                 | Coronin-1C                                                                 | Coro1c   |
| CoA_binding;Ligase_CoA                             | Q9WUM5                                                                                                                                                                                                 | Succinyl-CoA ligase [ADP/GDP-forming] subunit alpha, mitochondrial         | Suclg1   |
| WD40                                               | Q9WUQ2                                                                                                                                                                                                 | Prolactin regulatory element-binding protein                               | Preb     |
| 7tm_3;ANF_receptor;Sushi                           | Q9WV18;Q9WV18-2                                                                                                                                                                                        | Gamma-aminobutyric acid type B receptor subunit 1                          | Gabbr1   |
| Guanylate_kin;L27;PDZ;SH3_2                        | Q9WV34;Q9WV34-2                                                                                                                                                                                        | MAGUK p55 subfamily member 2                                               | Mpp2     |
| CBAH;NAAA-beta                                     | Q9WV54                                                                                                                                                                                                 | Acid ceramidase;Acid ceramidase subunit alpha;Acid ceramidase subunit beta | Asah1    |
| V-set                                              | Q9WV91                                                                                                                                                                                                 | Prostaglandin F2 receptor negative regulator                               | Ptgfrn   |
| 4_1_CTD;FA;FERM_C;FERM_M;FERM_N;SA<br>B            | Q9WV92;Q9WV92-3;Q9WV92-2;Q9WV92-6;Q9WV92-4;Q9WV92-5;Q9WV92-8;Q9WV92-7;P48193;P48193-2                                                                                                                  | Band 4.1-like protein 3;Band 4.1-like protein 3, N-terminally processed    | Epb4113  |
| FCH;SH3_9                                          | Q9WVE8                                                                                                                                                                                                 | Protein kinase C and casein kinase substrate in neurons protein 2          | Paccin2  |
|                                                    | Q9Z0E0;Q9Z0E0-2                                                                                                                                                                                        | Neurochondrin                                                              | Ncdn     |
| Paralemmin                                         | Q9Z0P4;Q9Z0P4-2                                                                                                                                                                                        | Paralemmin-1                                                               | Palm     |

# SUPPLEMENTARY DATA

|                                                      |                                          |                                                                                                                                                                   |          |
|------------------------------------------------------|------------------------------------------|-------------------------------------------------------------------------------------------------------------------------------------------------------------------|----------|
| Inositol_P                                           | Q9Z0S1                                   | 3(2),5-bisphosphate nucleotidase 1                                                                                                                                | Bpnt1    |
| AIF_C;Pyr_redox;Pyr_redox_2                          | Q9Z0X1;Q9Z0X1-2                          | Apoptosis-inducing factor 1, mitochondrial                                                                                                                        | Aifm1    |
| AA_permease_2                                        | Q9Z127;Q8BGK6;Q8BGK6-2                   | Large neutral amino acids transporter small subunit 1                                                                                                             | Slc7a5   |
| C2;Copine                                            | Q9Z140                                   | Copine-6                                                                                                                                                          | Cpne6    |
| C2;DUF1154;EF-hand_like;PI-PLC-X;PI-PLC-Y;PLC-beta_C | Q9Z1B3;Q9Z1B3-3;Q9Z1B3-2                 | 1-phosphatidylinositol 4,5-bisphosphate phosphodiesterase beta-1                                                                                                  | Plcb1    |
| V-ATPase_C                                           | Q9Z1G3;Q99L60;Q99L60-3;Q99L60-2          | V-type proton ATPase subunit C 1                                                                                                                                  | Atp6v1c1 |
| V_ATPase_I                                           | Q9Z1G4;Q9Z1G4-3;Q9Z1G4-2;Q9Z0R6;P15920-2 | V-type proton ATPase 116 kDa subunit a isoform 1                                                                                                                  | Atp6v0a1 |
| Cache_1;VWA_N                                        | Q9Z1L5                                   | Voltage-dependent calcium channel subunit alpha-2/delta-3; Voltage-dependent calcium channel subunit alpha-2-3; Voltage-dependent calcium channel subunit delta-3 | Cacna2d3 |
| DEAD;Helicase_C                                      | Q9Z1N5;Q8VDW0;Q8VDW0-2                   | Spliceosome RNA helicase Ddx39b                                                                                                                                   | Ddx39b   |
| Abhydrolase_5                                        | Q9Z1Q2;Q80YU0                            | Abhydrolase domain-containing protein 16A                                                                                                                         | Abhd16a  |
| Septin                                               | Q9Z1S5;Q9Z1S5-2                          | Neuronal-specific septin-3                                                                                                                                        | septin3  |
| WD40                                                 | Q9Z1Z2                                   | Serine-threonine kinase receptor-associated protein                                                                                                               | Strap    |
| DPPIV_N;Peptidase_S9                                 | Q9Z218                                   | Dipeptidyl aminopeptidase-like protein 6                                                                                                                          | Dpp6     |
| BTK;C2;PH;RasGAP                                     | Q9Z268                                   | RasGAP-activating-like protein 1                                                                                                                                  | Rasal1   |
| fn2;Sel1                                             | Q9Z2G6;Q9Z2G6-2                          | Protein sel-1 homolog 1                                                                                                                                           | Sel11    |
| DEP;G-gamma;RGS                                      | Q9Z2H2                                   | Regulator of G-protein signaling 6                                                                                                                                | Rgs6     |
| 4_1_CTD;FA;FERM_C;FERM_M;FERM_N;SAB                  | Q9Z2H5;Q9Z2H5-3;Q9Z2H5-2                 | Band 4.1-like protein 1                                                                                                                                           | Epb4111  |
| ATP-grasp_2;Ligase_CoA                               | Q9Z2I9                                   | Succinyl-CoA ligase [ADP-forming] subunit beta, mitochondrial                                                                                                     | Sucla2   |
| LCM;Septin                                           | Q9Z2Q6;P42209;Q8BYR1;Q8BYR1-2            | Septin-5                                                                                                                                                          | septin5  |
| Proteasome;Proteasome_A_N                            | Q9Z2U0;Q9CWH6                            | Proteasome subunit alpha type-7                                                                                                                                   | Psma7    |
| Proteasome;Proteasome_A_N                            | Q9Z2U1                                   | Proteasome subunit alpha type-5                                                                                                                                   | Psma5    |
| Peptidase_M18                                        | Q9Z2W0                                   | Aspartyl aminopeptidase                                                                                                                                           | Dnpep    |
| ANF_receptor;Lig_chan;Lig_chan-Glu_bd                | Q9Z2W8                                   | Glutamate receptor 4                                                                                                                                              | Gria4    |
| ANF_receptor;Lig_chan;Lig_chan-Glu_bd                | Q9Z2W9                                   | Glutamate receptor 3                                                                                                                                              | Gria3    |
|                                                      |                                          |                                                                                                                                                                   |          |

# SUPPLEMENTARY DATA

**Supplementary Table 2.** DAVID Platform: Exosome-related proteins present in our dataset.

| Official gene symbol | Gene name                                                                            | Species      |
|----------------------|--------------------------------------------------------------------------------------|--------------|
| Cnp                  | 2',3'-cyclic nucleotide 3' phosphodiesterase (Cnp)                                   | Mus musculus |
| Phgdh                | 3-phosphoglycerate dehydrogenase (Phgdh)                                             | Mus musculus |
| Abat                 | 4-aminobutyrate aminotransferase (Abat)                                              | Mus musculus |
| Nt5e                 | 5' nucleotidase, ecto (Nt5e)                                                         | Mus musculus |
| Nt5c                 | 5',3'-nucleotidase, cytosolic (Nt5c)                                                 | Mus musculus |
| Arf1                 | ADP-ribosylation factor 1(Arf1)                                                      | Mus musculus |
| Arf3                 | ADP-ribosylation factor 3(Arf3)                                                      | Mus musculus |
| Arf5                 | ADP-ribosylation factor 5(Arf5)                                                      | Mus musculus |
| Arf6                 | ADP-ribosylation factor 6(Arf6)                                                      | Mus musculus |
| Arl8a                | ADP-ribosylation factor-like 8A(Arl8a)                                               | Mus musculus |
| Arl8b                | ADP-ribosylation factor-like 8B(Arl8b)                                               | Mus musculus |
| Ahsa1                | AHA1, activator of heat shock protein ATPase 1(Ahsa1)                                | Mus musculus |
| Actr1b               | ARP1 actin-related protein 1B, centractin beta(Actr1b)                               | Mus musculus |
| Actr2                | ARP2 actin-related protein 2(Actr2)                                                  | Mus musculus |
| Actr3                | ARP3 actin-related protein 3(Actr3)                                                  | Mus musculus |
| Acly                 | ATP citrate lyase(Acly)                                                              | Mus musculus |
| Atp5b                | ATP synthase, H+ transporting mitochondrial F1 complex, beta subunit(Atp5b)          | Mus musculus |
| Atp5f1               | ATP synthase, H+ transporting, mitochondrial F0 complex, subunit B1(Atp5f1)          | Mus musculus |
| Atp5h                | ATP synthase, H+ transporting, mitochondrial F0 complex, subunit D(Atp5h)            | Mus musculus |
| Atp5j2               | ATP synthase, H+ transporting, mitochondrial F0 complex, subunit F2(Atp5j2)          | Mus musculus |
| Atp5l                | ATP synthase, H+ transporting, mitochondrial F0 complex, subunit G(Atp5l)            | Mus musculus |
| Atp5o                | ATP synthase, H+ transporting, mitochondrial F1 complex, O subunit(Atp5o)            | Mus musculus |
| Atp5a1               | ATP synthase, H+ transporting, mitochondrial F1 complex, alpha subunit 1(Atp5a1)     | Mus musculus |
| Atp5c1               | ATP synthase, H+ transporting, mitochondrial F1 complex, gamma polypeptide 1(Atp5c1) | Mus musculus |
| Abcb1a               | ATP-binding cassette, sub-family B (MDR/TAP), member 1A(Abcb1a)                      | Mus musculus |
| Atp2b1               | ATPase, Ca++ transporting, plasma membrane 1(Atp2b1)                                 | Mus musculus |
| Atp2b2               | ATPase, Ca++ transporting, plasma membrane 2(Atp2b2)                                 | Mus musculus |
| Atp6v0a1             | ATPase, H+ transporting, lysosomal V0 subunit A1(Atp6v0a1)                           | Mus musculus |
| Atp6v0c              | ATPase, H+ transporting, lysosomal V0 subunit C(Atp6v0c)                             | Mus musculus |
| Atp6v0d1             | ATPase, H+ transporting, lysosomal V0 subunit D1(Atp6v0d1)                           | Mus musculus |
| Atp6v1a              | ATPase, H+ transporting, lysosomal V1 subunit A(Atp6v1a)                             | Mus musculus |
| Atp6v1b2             | ATPase, H+ transporting, lysosomal V1 subunit B2(Atp6v1b2)                           | Mus musculus |
| Atp6v1c1             | ATPase, H+ transporting, lysosomal V1 subunit C1(Atp6v1c1)                           | Mus musculus |
| Atp6v1d              | ATPase, H+ transporting, lysosomal V1 subunit D(Atp6v1d)                             | Mus musculus |



## SUPPLEMENTARY DATA

|          |                                                                                  |              |
|----------|----------------------------------------------------------------------------------|--------------|
| Atp6v1e1 | ATPase, H+ transporting, lysosomal V1 subunit E1(Atp6v1e1)                       | Mus musculus |
| Atp6v1f  | ATPase, H+ transporting, lysosomal V1 subunit F(Atp6v1f)                         | Mus musculus |
| Atp6v1h  | ATPase, H+ transporting, lysosomal V1 subunit H(Atp6v1h)                         | Mus musculus |
| Atp6ap1  | ATPase, H+ transporting, lysosomal accessory protein 1(Atp6ap1)                  | Mus musculus |
| Atp1a1   | ATPase, Na+/K+ transporting, alpha 1 polypeptide(Atp1a1)                         | Mus musculus |
| Atp1b1   | ATPase, Na+/K+ transporting, beta 1 polypeptide(Atp1b1)                          | Mus musculus |
| Atp1b3   | ATPase, Na+/K+ transporting, beta 3 polypeptide(Atp1b3)                          | Mus musculus |
| Atp8a1   | ATPase, aminophospholipid transporter (APLT), class I, type 8A, member 1(Atp8a1) | Mus musculus |
| Cap1     | CAP, adenylate cyclase-associated protein 1 (yeast)(Cap1)                        | Mus musculus |
| Cd47     | CD47 antigen (Rh-related antigen, integrin-associated signal transducer)(Cd47)   | Mus musculus |
| Cd81     | CD81 antigen(Cd81)                                                               | Mus musculus |
| Cd82     | CD82 antigen(Cd82)                                                               | Mus musculus |
| Cd9      | CD9 antigen(Cd9)                                                                 | Mus musculus |
| Cisd1    | CDGSH iron sulfur domain 1(Cisd1)                                                | Mus musculus |
| Cndp2    | CNDP dipeptidase 2 (metallopeptidase M20 family)(Cndp2)                          | Mus musculus |
| Ddt      | D-dopachrome tautomerase(Ddt)                                                    | Mus musculus |
| Dnaja1   | DnaJ heat shock protein family (Hsp40) member A1(Dnaja1)                         | Mus musculus |
| Dnajc3   | DnaJ heat shock protein family (Hsp40) member C3(Dnajc3)                         | Mus musculus |
| Dnajc5   | DnaJ heat shock protein family (Hsp40) member C5(Dnajc5)                         | Mus musculus |
| Edil3    | EGF-like repeats and discoidin I-like domains 3(Edil3)                           | Mus musculus |
| Erlin2   | ER lipid raft associated 2(Erlin2)                                               | Mus musculus |
| Fbxo2    | F-box protein 2(Fbxo2)                                                           | Mus musculus |
| Fkbp1a   | FK506 binding protein 1a(Fkbp1a)                                                 | Mus musculus |
| Fkbp2    | FK506 binding protein 2(Fkbp2)                                                   | Mus musculus |
| Gnas     | GNAS (guanine nucleotide binding protein, alpha stimulating) complex locus(Gnas) | Mus musculus |
| Lancl1   | LanC (bacterial lantibiotic synthetase component C)-like 1(Lancl1)               | Mus musculus |
| Asah1    | N-acylsphingosine amidohydrolase 1(Asah1)                                        | Mus musculus |
| Napa     | N-ethylmaleimide sensitive fusion protein attachment protein alpha(Napa)         | Mus musculus |
| Napb     | N-ethylmaleimide sensitive fusion protein attachment protein beta(Napb)          | Mus musculus |
| Napg     | N-ethylmaleimide sensitive fusion protein attachment protein gamma(Napg)         | Mus musculus |
| Nsf      | N-ethylmaleimide sensitive fusion protein(Nsf)                                   | Mus musculus |
| Ndrg1    | N-myc downstream regulated gene 1(Ndrg1)                                         | Mus musculus |
| Ndrg2    | N-myc downstream regulated gene 2(Ndrg2)                                         | Mus musculus |
| Ndrg3    | N-myc downstream regulated gene 3(Ndrg3)                                         | Mus musculus |
| Ndufa13  | NADH dehydrogenase (ubiquinone) 1 alpha subcomplex, 13(Ndufa13)                  | Mus musculus |
| Ndufa4   | NADH dehydrogenase (ubiquinone) 1 alpha subcomplex, 4(Ndufa4)                    | Mus musculus |
| Ndufb3   | NADH dehydrogenase (ubiquinone) 1 beta subcomplex 3(Ndufb3)                      | Mus musculus |
| Ndufb4   | NADH dehydrogenase (ubiquinone) 1 beta subcomplex 4(Ndufb4)                      | Mus musculus |
| Ndufb10  | NADH dehydrogenase (ubiquinone) 1 beta subcomplex, 10(Ndufb10)                   | Mus musculus |
| Ndufb9   | NADH dehydrogenase (ubiquinone) 1 beta subcomplex, 9(Ndufb9)                     | Mus musculus |

## SUPPLEMENTARY DATA

|          |                                                               |              |
|----------|---------------------------------------------------------------|--------------|
| Nckap1   | NCK-associated protein 1(Nckap1)                              | Mus musculus |
| Nme1     | NME/NM23 nucleoside diphosphate kinase 1(Nme1)                | Mus musculus |
| Nme2     | NME/NM23 nucleoside diphosphate kinase 2(Nme2)                | Mus musculus |
| Npc1     | Niemann-Pick type C1(Npc1)                                    | Mus musculus |
| Otub1    | OTU domain, ubiquitin aldehyde binding 1(Otub1)               | Mus musculus |
| Ola1     | Obg-like ATPase 1(Ola1)                                       | Mus musculus |
| Park7    | Parkinson disease (autosomal recessive, early onset) 7(Park7) | Mus musculus |
| Rab10    | RAB10, member RAS oncogene family(Rab10)                      | Mus musculus |
| Rab11a   | RAB11A, member RAS oncogene family(Rab11a)                    | Mus musculus |
| Rab11b   | RAB11B, member RAS oncogene family(Rab11b)                    | Mus musculus |
| Rab14    | RAB14, member RAS oncogene family(Rab14)                      | Mus musculus |
| Rab18    | RAB18, member RAS oncogene family(Rab18)                      | Mus musculus |
| Rab1A    | RAB1A, member RAS oncogene family(Rab1a)                      | Mus musculus |
| Rab1b    | RAB1B, member RAS oncogene family(Rab1b)                      | Mus musculus |
| Rab21    | RAB21, member RAS oncogene family(Rab21)                      | Mus musculus |
| Rab2a    | RAB2A, member RAS oncogene family(Rab2a)                      | Mus musculus |
| Rab35    | RAB35, member RAS oncogene family(Rab35)                      | Mus musculus |
| Rab5a    | RAB5A, member RAS oncogene family(Rab5a)                      | Mus musculus |
| Rab5b    | RAB5B, member RAS oncogene family(Rab5b)                      | Mus musculus |
| Rab5c    | RAB5C, member RAS oncogene family(Rab5c)                      | Mus musculus |
| Rab6a    | RAB6A, member RAS oncogene family(Rab6a)                      | Mus musculus |
| Ran      | RAN, member RAS oncogene family(Ran)                          | Mus musculus |
| Rap1gds1 | RAP1, GTP-GDP dissociation stimulator 1(Rap1gds1)             | Mus musculus |
| Rap2b    | RAP2B, member of RAS oncogene family(Rap2b)                   | Mus musculus |
| Rap2c    | RAP2C, member of RAS oncogene family(Rap2c)                   | Mus musculus |
| Rap1b    | RAS related protein 1b(Rap1b)                                 | Mus musculus |
| Rap2a    | RAS related protein 2a(Rap2a)                                 | Mus musculus |
| Rac1     | RAS-related C3 botulinum substrate 1(Rac1)                    | Mus musculus |
| Rac2     | RAS-related C3 botulinum substrate 2(Rac2)                    | Mus musculus |
| Rheb     | Ras homolog enriched in brain(Rheb)                           | Mus musculus |
| Arhgdia  | Rho GDP dissociation inhibitor (GDI) alpha(Arhgdia)           | Mus musculus |
| Arhgap1  | Rho GTPase activating protein 1(Arhgap1)                      | Mus musculus |
| Ahcy     | S-adenosylhomocysteine hydrolase(Ahcy)                        | Mus musculus |
| Ahcy11   | S-adenosylhomocysteine hydrolase-like 1(Ahcy11)               | Mus musculus |
| S100a16  | S100 calcium binding protein A16(S100a16)                     | Mus musculus |
| Samm50   | SAMM50 sorting and assembly machinery component(Samm50)       | Mus musculus |
| Sec11a   | SEC11 homolog A, signal peptidase complex subunit(Sec11a)     | Mus musculus |
| Sh3gl2   | SH3-domain GRB2-like 2(Sh3gl2)                                | Mus musculus |
| Sparcl1  | SPARC-like 1(Sparcl1)                                         | Mus musculus |
| Sub1     | SUB1 homolog (S. cerevisiae)(Sub1)                            | Mus musculus |

## SUPPLEMENTARY DATA

|         |                                                                                              |              |
|---------|----------------------------------------------------------------------------------------------|--------------|
| Tufm    | Tu translation elongation factor, mitochondrial(Tufm)                                        | Mus musculus |
| Galnt16 | UDP-N-acetyl-alpha-D-galactosamine:polypeptide N-acetylgalactosaminyltransferase 16(Galnt16) | Mus musculus |
| Galnt2  | UDP-N-acetyl-alpha-D-galactosamine:polypeptide N-acetylgalactosaminyltransferase 2(Galnt2)   | Mus musculus |
| Uggt1   | UDP-glucose glycoprotein glucosyltransferase 1(Uggt1)                                        | Mus musculus |
| Ugp2    | UDP-glucose pyrophosphorylase 2(Ugp2)                                                        | Mus musculus |
| Vps29   | VPS29 retromer complex component(Vps29)                                                      | Mus musculus |
| Vps35   | VPS35 retromer complex component(Vps35)                                                      | Mus musculus |
| Wdr1    | WD repeat domain 1(Wdr1)                                                                     | Mus musculus |
| Yes1    | YES proto-oncogene 1, Src family tyrosine kinase(Yes1)                                       | Mus musculus |
| Adam10  | a disintegrin and metallopeptidase domain 10(Adam10)                                         | Mus musculus |
| Acat1   | acetyl-Coenzyme A acetyltransferase 1(Acat1)                                                 | Mus musculus |
| Acat2   | acetyl-Coenzyme A acetyltransferase 2(Acat2)                                                 | Mus musculus |
| Acp2    | acid phosphatase 2, lysosomal(Acp2)                                                          | Mus musculus |
| Arpc1a  | actin related protein 2/3 complex, subunit 1A(Arpc1a)                                        | Mus musculus |
| Arpc2   | actin related protein 2/3 complex, subunit 2(Arpc2)                                          | Mus musculus |
| Arpc3   | actin related protein 2/3 complex, subunit 3(Arpc3)                                          | Mus musculus |
| Arpc4   | actin related protein 2/3 complex, subunit 4(Arpc4)                                          | Mus musculus |
| Arpc5l  | actin related protein 2/3 complex, subunit 5-like(Arpc5l)                                    | Mus musculus |
| Acta1   | actin, alpha 1, skeletal muscle(Acta1)                                                       | Mus musculus |
| Acta2   | actin, alpha 2, smooth muscle, aorta(Acta2)                                                  | Mus musculus |
| Actc1   | actin, alpha, cardiac muscle 1(Actc1)                                                        | Mus musculus |
| Actg2   | actin, gamma 2, smooth muscle, enteric(Actg2)                                                | Mus musculus |
| Actg1   | actin, gamma, cytoplasmic 1(Actg1)                                                           | Mus musculus |
| Actn1   | actinin, alpha 1(Actn1)                                                                      | Mus musculus |
| Alcam   | activated leukocyte cell adhesion molecule(Alcam)                                            | Mus musculus |
| Acot13  | acyl-CoA thioesterase 13(Acot13)                                                             | Mus musculus |
| Acot7   | acyl-CoA thioesterase 7(Acot7)                                                               | Mus musculus |
| Acyp1   | acylphosphatase 1, erythrocyte (common) type(Acyp1)                                          | Mus musculus |
| Ap2m1   | adaptor-related protein complex 2, mu 1 subunit(Ap2m1)                                       | Mus musculus |
| Ak1     | adenylate kinase 1(Ak1)                                                                      | Mus musculus |
| Adss    | adenylosuccinate synthetase, non muscle(Adss)                                                | Mus musculus |
| Apmap   | adipocyte plasma membrane associated protein(Apmap)                                          | Mus musculus |
| Aars    | alanyl-tRNA synthetase(Aars)                                                                 | Mus musculus |
| Alb     | albumin(Alb)                                                                                 | Mus musculus |
| Adh5    | alcohol dehydrogenase 5 (class III), chi polypeptide(Adh5)                                   | Mus musculus |
| Aldh1l1 | aldehyde dehydrogenase 1 family, member L1(Aldh1l1)                                          | Mus musculus |
| Aldh2   | aldehyde dehydrogenase 2, mitochondrial(Aldh2)                                               | Mus musculus |
| Aldh3b1 | aldehyde dehydrogenase 3 family, member B1(Aldh3b1)                                          | Mus musculus |
| Aldh1a1 | aldehyde dehydrogenase family 1, subfamily A1(Aldh1a1)                                       | Mus musculus |

## SUPPLEMENTARY DATA

|          |                                                                      |              |
|----------|----------------------------------------------------------------------|--------------|
| Aldh3a2  | aldehyde dehydrogenase family 3, subfamily A2(Aldh3a2)               | Mus musculus |
| Aldh7a1  | aldehyde dehydrogenase family 7, member A1(Aldh7a1)                  | Mus musculus |
| Akr1a1   | aldo-keto reductase family 1, member A1 (aldehyde reductase)(Akr1a1) | Mus musculus |
| Aldoa    | aldolase A, fructose-bisphosphate(Aldoa)                             | Mus musculus |
| Aldoc    | aldolase C, fructose-bisphosphate(Aldoc)                             | Mus musculus |
| Alpl     | alkaline phosphatase, liver/bone/kidney(Alpl)                        | Mus musculus |
| Ganab    | alpha glucosidase 2 alpha neutral subunit(Ganab)                     | Mus musculus |
| Npepps   | aminopeptidase puromycin sensitive(Npepps)                           | Mus musculus |
| App      | amyloid beta (A4) precursor protein(App)                             | Mus musculus |
| Aplp2    | amyloid beta (A4) precursor-like protein 2(Aplp2)                    | Mus musculus |
| Anxa11   | annexin A11(Anxa11)                                                  | Mus musculus |
| Anxa2    | annexin A2(Anxa2)                                                    | Mus musculus |
| Anxa3    | annexin A3(Anxa3)                                                    | Mus musculus |
| Anxa4    | annexin A4(Anxa4)                                                    | Mus musculus |
| Anxa5    | annexin A5(Anxa5)                                                    | Mus musculus |
| Anxa6    | annexin A6(Anxa6)                                                    | Mus musculus |
| Anxa7    | annexin A7(Anxa7)                                                    | Mus musculus |
| Apod     | apolipoprotein D(Apod)                                               | Mus musculus |
| Apoe     | apolipoprotein E(Apoe)                                               | Mus musculus |
| Asna1    | arsA arsenite transporter, ATP-binding, homolog 1 (bacterial)(Asna1) | Mus musculus |
| Nars     | asparaginy1-tRNA synthetase(Nars)                                    | Mus musculus |
| Bsg      | basigin(Bsg)                                                         | Mus musculus |
| Bpnt1    | bisphosphate 3'-nucleotidase 1(Bpnt1)                                | Mus musculus |
| Blmh     | bleomycin hydrolase(Blmh)                                            | Mus musculus |
| Basp1    | brain abundant, membrane attached signal protein 1(Basp1)            | Mus musculus |
| Pygb     | brain glycogen phosphorylase(Pygb)                                   | Mus musculus |
| Cdh13    | cadherin 13(Cdh13)                                                   | Mus musculus |
| Cdh2     | cadherin 2(Cdh2)                                                     | Mus musculus |
| Calb1    | calbindin 1(Calb1)                                                   | Mus musculus |
| Cacna2d1 | calcium channel, voltage-dependent, alpha2/delta subunit 1(Cacna2d1) | Mus musculus |
| Canx     | calnexin(Canx)                                                       | Mus musculus |
| Capn2    | calpain 2(Capn2)                                                     | Mus musculus |
| Capn5    | calpain 5(Capn5)                                                     | Mus musculus |
| Calr     | calreticulin(Calr)                                                   | Mus musculus |
| Clstn1   | calsyntenin 1(Clstn1)                                                | Mus musculus |
| Capza2   | capping protein (actin filament) muscle Z-line, alpha 2(Capza2)      | Mus musculus |
| Capzb    | capping protein (actin filament) muscle Z-line, beta(Capzb)          | Mus musculus |
| Cbr1     | carbonyl reductase 1(Cbr1)                                           | Mus musculus |
| Cpd      | carboxypeptidase D(Cpd)                                              | Mus musculus |
| Cpe      | carboxypeptidase E(Cpe)                                              | Mus musculus |

## SUPPLEMENTARY DATA

|        |                                                                |              |
|--------|----------------------------------------------------------------|--------------|
| Crtac1 | cartilage acidic protein 1(Crtac1)                             | Mus musculus |
| Cat    | catalase(Cat)                                                  | Mus musculus |
| Ctnnb1 | catenin (cadherin associated protein), beta 1(Ctnnb1)          | Mus musculus |
| Ctsb   | cathepsin B(Ctsb)                                              | Mus musculus |
| Ctsd   | cathepsin D(Ctsd)                                              | Mus musculus |
| Cadm1  | cell adhesion molecule 1(Cadm1)                                | Mus musculus |
| Cadm4  | cell adhesion molecule 4(Cadm4)                                | Mus musculus |
| Chl1   | cell adhesion molecule L1-like(Chl1)                           | Mus musculus |
| Cdc37  | cell division cycle 37(Cdc37)                                  | Mus musculus |
| Cdc42  | cell division cycle 42(Cdc42)                                  | Mus musculus |
| Cct2   | chaperonin containing Tcp1, subunit 2 (beta)(Cct2)             | Mus musculus |
| Cct3   | chaperonin containing Tcp1, subunit 3 (gamma)(Cct3)            | Mus musculus |
| Cct4   | chaperonin containing Tcp1, subunit 4 (delta)(Cct4)            | Mus musculus |
| Cct5   | chaperonin containing Tcp1, subunit 5 (epsilon)(Cct5)          | Mus musculus |
| Cct6a  | chaperonin containing Tcp1, subunit 6a (zeta)(Cct6a)           | Mus musculus |
| Cct7   | chaperonin containing Tcp1, subunit 7 (eta)(Cct7)              | Mus musculus |
| Cct8   | chaperonin containing Tcp1, subunit 8 (theta)(Cct8)            | Mus musculus |
| Chmp4b | charged multivesicular body protein 4B(Chmp4b)                 | Mus musculus |
| Chmp6  | charged multivesicular body protein 6(Chmp6)                   | Mus musculus |
| Chid1  | chitinase domain containing 1(Chid1)                           | Mus musculus |
| Cs     | citrate synthase(Cs)                                           | Mus musculus |
| Cltc   | clathrin, heavy polypeptide (Hc)(Cltc)                         | Mus musculus |
| Clu    | clusterin(Clu)                                                 | Mus musculus |
| Cotl1  | coactosin-like 1 (Dictyostelium)(Cotl1)                        | Mus musculus |
| F3     | coagulation factor III(F3)                                     | Mus musculus |
| Cfl1   | cofilin 1, non-muscle(Cfl1)                                    | Mus musculus |
| Cfl2   | cofilin 2, muscle(Cfl2)                                        | Mus musculus |
| C1qc   | complement component 1, q subcomponent, C chain(C1qc)          | Mus musculus |
| C1qb   | complement component 1, q subcomponent, beta polypeptide(C1qb) | Mus musculus |
| Cntn1  | contactin 1(Cntn1)                                             | Mus musculus |
| Cpne2  | copine II(Cpne2)                                               | Mus musculus |
| Cpne4  | copine IV(Cpne4)                                               | Mus musculus |
| Cpne5  | copine V(Cpne5)                                                | Mus musculus |
| Cpne6  | copine VI(Cpne6)                                               | Mus musculus |
| Cpne9  | copine family member IX(Cpne9)                                 | Mus musculus |
| Coro1a | coronin, actin binding protein 1A(Coro1a)                      | Mus musculus |
| Coro1b | coronin, actin binding protein 1B(Coro1b)                      | Mus musculus |
| Ckb    | creatine kinase, brain(Ckb)                                    | Mus musculus |
| Ckmt1  | creatine kinase, mitochondrial 1, ubiquitous(Ckmt1)            | Mus musculus |
| Cryab  | crystallin, alpha B(Cryab)                                     | Mus musculus |

## SUPPLEMENTARY DATA

|         |                                                                                        |              |
|---------|----------------------------------------------------------------------------------------|--------------|
| Crym    | crystallin, mu(Crym)                                                                   | Mus musculus |
| Cul3    | cullin 3(Cul3)                                                                         | Mus musculus |
| Cand1   | cullin associated and neddylation disassociated 1(Cand1)                               | Mus musculus |
| Ccny    | cyclin Y(Ccny)                                                                         | Mus musculus |
| Cst3    | cystatin C(Cst3)                                                                       | Mus musculus |
| Csrp1   | cysteine and glycine-rich protein 1(Csrp1)                                             | Mus musculus |
| Cmpk1   | cytidine monophosphate (UMP-CMP) kinase 1(Cmpk1)                                       | Mus musculus |
| Cox4i1  | cytochrome c oxidase subunit IV isoform 1(Cox4i1)                                      | Mus musculus |
| Cox7a2  | cytochrome c oxidase subunit VIIa 2(Cox7a2)                                            | Mus musculus |
| Cox5a   | cytochrome c oxidase subunit Va(Cox5a)                                                 | Mus musculus |
| Cyfp2   | cytoplasmic FMR1 interacting protein 2(Cyfp2)                                          | Mus musculus |
| Ckap4   | cytoskeleton-associated protein 4(Ckap4)                                               | Mus musculus |
| Ddb1    | damage specific DNA binding protein 1(Ddb1)                                            | Mus musculus |
| Dad1    | defender against cell death 1(Dad1)                                                    | Mus musculus |
| Dstn    | destrin(Dstn)                                                                          | Mus musculus |
| Dbi     | diazepam binding inhibitor(Dbi)                                                        | Mus musculus |
| Dlst    | dihydrolipoamide S-succinyltransferase (E2 component of 2-oxo-glutarate complex)(Dlst) | Mus musculus |
| Dpysl2  | dihydropyrimidinase-like 2(Dpysl2)                                                     | Mus musculus |
| Ddah1   | dimethylarginine dimethylaminohydrolase 1(Ddah1)                                       | Mus musculus |
| Dpp6    | dipeptidylpeptidase 6(Dpp6)                                                            | Mus musculus |
| Dlg1    | discs, large homolog 1 (Drosophila)(Dlg1)                                              | Mus musculus |
| Dusp3   | dual specificity phosphatase 3 (vaccinia virus phosphatase VH1-related)(Dusp3)         | Mus musculus |
| Dctn2   | dynactin 2(Dctn2)                                                                      | Mus musculus |
| Dnm1    | dynamin 1(Dnm1)                                                                        | Mus musculus |
| Dnm3    | dynamin 3(Dnm3)                                                                        | Mus musculus |
| Dync1h1 | dynein cytoplasmic 1 heavy chain 1(Dync1h1)                                            | Mus musculus |
| Entpd2  | ectonucleoside triphosphate diphosphohydrolase 2(Entpd2)                               | Mus musculus |
| Enpp6   | ectonucleotide pyrophosphatase/phosphodiesterase 6(Enpp6)                              | Mus musculus |
| Etfa    | electron transferring flavoprotein, alpha polypeptide(Etfa)                            | Mus musculus |
| Endod1  | endonuclease domain containing 1(Endod1)                                               | Mus musculus |
| Erp29   | endoplasmic reticulum protein 29(Erp29)                                                | Mus musculus |
| Erp44   | endoplasmic reticulum protein 44(Erp44)                                                | Mus musculus |
| Eno1    | enolase 1, alpha non-neuron(Eno1)                                                      | Mus musculus |
| Eno2    | enolase 2, gamma neuronal(Eno2)                                                        | Mus musculus |
| Enoph1  | enolase-phosphatase 1(Enoph1)                                                          | Mus musculus |
| Echs1   | enoyl Coenzyme A hydratase, short chain, 1, mitochondrial(Echs1)                       | Mus musculus |
| Epdr1   | ependymin related protein 1 (zebrafish)(Epdr1)                                         | Mus musculus |
| Epb4112 | erythrocyte membrane protein band 4.1 like 2(Epb4112)                                  | Mus musculus |
| Esd     | esterase D/formylglutathione hydrolase(Esd)                                            | Mus musculus |

## SUPPLEMENTARY DATA

|         |                                                                   |              |
|---------|-------------------------------------------------------------------|--------------|
| Eef1a1  | eukaryotic translation elongation factor 1 alpha 1(Eef1a1)        | Mus musculus |
| Eef1g   | eukaryotic translation elongation factor 1 gamma(Eef1g)           | Mus musculus |
| Eef2    | eukaryotic translation elongation factor 2(Eef2)                  | Mus musculus |
| Eif4a1  | eukaryotic translation initiation factor 4A1(Eif4a1)              | Mus musculus |
| Eif5a   | eukaryotic translation initiation factor 5A(Eif5a)                | Mus musculus |
| Extl2   | exostosins (multiple)-like 2(Extl2)                               | Mus musculus |
| Fam213a | family with sequence similarity 213, member A(Fam213a)            | Mus musculus |
| Fam3c   | family with sequence similarity 3, member C(Fam3c)                | Mus musculus |
| Fam49b  | family with sequence similarity 49, member B(Fam49b)              | Mus musculus |
| Fscn1   | fascin actin-bundling protein 1(Fscn1)                            | Mus musculus |
| Fabp3   | fatty acid binding protein 3, muscle and heart(Fabp3)             | Mus musculus |
| Fabp5   | fatty acid binding protein 5, epidermal(Fabp5)                    | Mus musculus |
| Fasn    | fatty acid synthase(Fasn)                                         | Mus musculus |
| Fth1    | ferritin heavy polypeptide 1(Fth1)                                | Mus musculus |
| Ftl1    | ferritin light polypeptide 1(Ftl1)                                | Mus musculus |
| Flot1   | flotillin 1(Flot1)                                                | Mus musculus |
| Flot2   | flotillin 2(Flot2)                                                | Mus musculus |
| Folh1   | folate hydrolase 1(Folh1)                                         | Mus musculus |
| Gabrb2  | gamma-aminobutyric acid (GABA) A receptor, subunit beta 2(Gabrb2) | Mus musculus |
| Gja1    | gap junction protein, alpha 1(Gja1)                               | Mus musculus |
| Gnpda1  | glucosamine-6-phosphate deaminase 1(Gnpda1)                       | Mus musculus |
| Grm5    | glutamate receptor, metabotropic 5(Grm5)                          | Mus musculus |
| Glul    | glutamate-ammonia ligase (glutamine synthetase)(Glul)             | Mus musculus |
| Got2    | glutamatic-oxaloacetic transaminase 2, mitochondrial(Got2)        | Mus musculus |
| Got1    | glutamic-oxaloacetic transaminase 1, soluble(Got1)                | Mus musculus |
| Gstm5   | glutathione S-transferase, mu 5(Gstm5)                            | Mus musculus |
| Gstp1   | glutathione S-transferase, pi 1(Gstp1)                            | Mus musculus |
| Gstp2   | glutathione S-transferase, pi 2(Gstp2)                            | Mus musculus |
| Gpx4    | glutathione peroxidase 4(Gpx4)                                    | Mus musculus |
| Gapdh   | glyceraldehyde-3-phosphate dehydrogenase(Gapdh)                   | Mus musculus |
| Gpd1    | glycerol-3-phosphate dehydrogenase 1 (soluble)(Gpd1)              | Mus musculus |
| Gpd1l   | glycerol-3-phosphate dehydrogenase 1-like(Gpd1l)                  | Mus musculus |
| Gltp    | glycolipid transfer protein(Gltp)                                 | Mus musculus |
| Gpm6a   | glycoprotein m6a(Gpm6a)                                           | Mus musculus |
| Glo1    | glyoxalase 1(Glo1)                                                | Mus musculus |
| Glod4   | glyoxalase domain containing 4(Glod4)                             | Mus musculus |
| Grhpr   | glyoxylate reductase/hydroxypyruvate reductase(Grhpr)             | Mus musculus |
| Gpc1    | glypican 1(Gpc1)                                                  | Mus musculus |
| Glg1    | golgi apparatus protein 1(Glg1)                                   | Mus musculus |
| Golga7  | golgi autoantigen, golgin subfamily a, 7(Golga7)                  | Mus musculus |

## SUPPLEMENTARY DATA

|           |                                                                             |              |
|-----------|-----------------------------------------------------------------------------|--------------|
| Grb2      | growth factor receptor bound protein 2(Grb2)                                | Mus musculus |
| Gda       | guanine deaminase(Gda)                                                      | Mus musculus |
| Gnai1     | guanine nucleotide binding protein (G protein), alpha inhibiting 1(Gnai1)   | Mus musculus |
| Gnai2     | guanine nucleotide binding protein (G protein), alpha inhibiting 2(Gnai2)   | Mus musculus |
| Gnai3     | guanine nucleotide binding protein (G protein), alpha inhibiting 3(Gnai3)   | Mus musculus |
| Gnb1      | guanine nucleotide binding protein (G protein), beta 1(Gnb1)                | Mus musculus |
| Gnb2      | guanine nucleotide binding protein (G protein), beta 2(Gnb2)                | Mus musculus |
| Gnb4      | guanine nucleotide binding protein (G protein), beta 4(Gnb4)                | Mus musculus |
| Gng12     | guanine nucleotide binding protein (G protein), gamma 12(Gng12)             | Mus musculus |
| Gng2      | guanine nucleotide binding protein (G protein), gamma 2(Gng2)               | Mus musculus |
| Gna11     | guanine nucleotide binding protein, alpha 11(Gna11)                         | Mus musculus |
| Gna13     | guanine nucleotide binding protein, alpha 13(Gna13)                         | Mus musculus |
| Gnaq      | guanine nucleotide binding protein, alpha q polypeptide(Gnaq)               | Mus musculus |
| Gnal      | guanine nucleotide binding protein, alpha stimulating, olfactory type(Gnal) | Mus musculus |
| Gnaz      | guanine nucleotide binding protein, alpha z subunit(Gnaz)                   | Mus musculus |
| Gdi2      | guanosine diphosphate (GDP) dissociation inhibitor 2(Gdi2)                  | Mus musculus |
| Hdhd2     | haloacid dehalogenase-like hydrolase domain containing 2(Hdhd2)             | Mus musculus |
| Hsph1     | heat shock 105kDa/110kDa protein 1(Hsph1)                                   | Mus musculus |
| Hspe1     | heat shock protein 1 (chaperonin 10)(Hspe1)                                 | Mus musculus |
| Hspd1     | heat shock protein 1 (chaperonin)(Hspd1)                                    | Mus musculus |
| Hspa12a   | heat shock protein 12A(Hspa12a)                                             | Mus musculus |
| Hspa4     | heat shock protein 4(Hspa4)                                                 | Mus musculus |
| Hspa5     | heat shock protein 5(Hspa5)                                                 | Mus musculus |
| Hspa13    | heat shock protein 70 family, member 13(Hspa13)                             | Mus musculus |
| Hspa8     | heat shock protein 8(Hspa8)                                                 | Mus musculus |
| Hspa9     | heat shock protein 9(Hspa9)                                                 | Mus musculus |
| Hsp90ab1  | heat shock protein 90 alpha (cytosolic), class B member 1(Hsp90ab1)         | Mus musculus |
| Hsp90aa1  | heat shock protein 90, alpha (cytosolic), class A member 1(Hsp90aa1)        | Mus musculus |
| Hsp90b1   | heat shock protein 90, beta (Grp94), member 1(Hsp90b1)                      | Mus musculus |
| Hnrnpa1   | heterogeneous nuclear ribonucleoprotein A1(Hnrnpa1)                         | Mus musculus |
| Hnrnpa2b1 | heterogeneous nuclear ribonucleoprotein A2/B1(Hnrnpa2b1)                    | Mus musculus |
| Hnrnpd    | heterogeneous nuclear ribonucleoprotein D(Hnrnpd)                           | Mus musculus |
| Hnrnpdl   | heterogeneous nuclear ribonucleoprotein D-like(Hnrnpdl)                     | Mus musculus |
| Hnrnpk    | heterogeneous nuclear ribonucleoprotein K(Hnrnpk)                           | Mus musculus |
| Hexb      | hexosaminidase B(Hexb)                                                      | Mus musculus |
| Hpcal1    | hippocalcin-like 1(Hpcal1)                                                  | Mus musculus |
| Hint1     | histidine triad nucleotide binding protein 1(Hint1)                         | Mus musculus |
| Hint3     | histidine triad nucleotide binding protein 3(Hint3)                         | Mus musculus |
| Hist1h4a  | histone cluster 1, H4a(Hist1h4a)                                            | Mus musculus |
| Hdac11    | histone deacetylase 11(Hdac11)                                              | Mus musculus |



## SUPPLEMENTARY DATA

|        |                                                                        |              |
|--------|------------------------------------------------------------------------|--------------|
| Hagh   | hydroxyacyl glutathione hydrolase(Hagh)                                | Mus musculus |
| Hyou1  | hypoxia up-regulated 1(Hyou1)                                          | Mus musculus |
| Igsf8  | immunoglobulin superfamily, member 8(Igsf8)                            | Mus musculus |
| Impa1  | inositol (myo)-1(or 4)-monophosphatase 1(Impa1)                        | Mus musculus |
| Inpp5a | inositol polyphosphate-5-phosphatase A(Inpp5a)                         | Mus musculus |
| Itm2c  | integral membrane protein 2C(Itm2c)                                    | Mus musculus |
| Itfg1  | integrin alpha FG-GAP repeat containing 1(Itfg1)                       | Mus musculus |
| Itgam  | integrin alpha M(Itgam)                                                | Mus musculus |
| Itgav  | integrin alpha V(Itgav)                                                | Mus musculus |
| Itgb1  | integrin beta 1 (fibronectin receptor beta)(Itgb1)                     | Mus musculus |
| Itgb8  | integrin beta 8(Itgb8)                                                 | Mus musculus |
| Idh1   | isocitrate dehydrogenase 1 (NADP+), soluble(Idh1)                      | Mus musculus |
| Idh2   | isocitrate dehydrogenase 2 (NADP+), mitochondrial(Idh2)                | Mus musculus |
| Jup    | junction plakoglobin(Jup)                                              | Mus musculus |
| Kpnb1  | karyopherin (importin) beta 1(Kpnb1)                                   | Mus musculus |
| Ldha   | lactate dehydrogenase A(Ldha)                                          | Mus musculus |
| Ldhb   | lactate dehydrogenase B(Ldhb)                                          | Mus musculus |
| Lxn    | latexin(Lxn)                                                           | Mus musculus |
| Lman2  | lectin, mannose-binding 2(Lman2)                                       | Mus musculus |
| Lman1  | lectin, mannose-binding, 1(Lman1)                                      | Mus musculus |
| Lap3   | leucine aminopeptidase 3(Lap3)                                         | Mus musculus |
| Lrrc57 | leucine rich repeat containing 57(Lrrc57)                              | Mus musculus |
| Lta4h  | leukotriene A4 hydrolase(Lta4h)                                        | Mus musculus |
| Lin7a  | lin-7 homolog A (C. elegans)(Lin7a)                                    | Mus musculus |
| Lin7c  | lin-7 homolog C (C. elegans)(Lin7c)                                    | Mus musculus |
| Lamp1  | lysosomal-associated membrane protein 1(Lamp1)                         | Mus musculus |
| Lamp2  | lysosomal-associated membrane protein 2(Lamp2)                         | Mus musculus |
| Mif    | macrophage migration inhibitory factor(Mif)                            | Mus musculus |
| Mdh1   | malate dehydrogenase 1, NAD (soluble)(Mdh1)                            | Mus musculus |
| Mdh2   | malate dehydrogenase 2, NAD (mitochondrial)(Mdh2)                      | Mus musculus |
| Mpdu1  | mannose-P-dolichol utilization defect 1(Mpdu1)                         | Mus musculus |
| Mogs   | mannosyl-oligosaccharide glucosidase(Mogs)                             | Mus musculus |
| Mpp6   | membrane protein, palmitoylated 6 (MAGUK p55 subfamily member 6)(Mpp6) | Mus musculus |
| Mblac2 | metallo-beta-lactamase domain containing 2(Mblac2)                     | Mus musculus |
| Mgst3  | microsomal glutathione S-transferase 3(Mgst3)                          | Mus musculus |
| Mfge8  | milk fat globule-EGF factor 8 protein(Mfge8)                           | Mus musculus |
| Mtch2  | mitochondrial carrier 2(Mtch2)                                         | Mus musculus |
| Mapk1  | mitogen-activated protein kinase 1(Mapk1)                              | Mus musculus |
| Map2k1 | mitogen-activated protein kinase kinase 1(Map2k1)                      | Mus musculus |
| Msn    | moesin(Msn)                                                            | Mus musculus |

## SUPPLEMENTARY DATA

|        |                                                                    |              |
|--------|--------------------------------------------------------------------|--------------|
| Maob   | monoamine oxidase B(Maob)                                          | Mus musculus |
| Mras   | muscle and microspikes RAS(Mras)                                   | Mus musculus |
| Pygm   | muscle glycogen phosphorylase(Pygm)                                | Mus musculus |
| Mydgf  | myeloid derived growth factor(Mydgf)                               | Mus musculus |
| Myadm  | myeloid-associated differentiation marker(Myadm)                   | Mus musculus |
| Myo1d  | myosin ID(Myo1d)                                                   | Mus musculus |
| Myh10  | myosin, heavy polypeptide 10, non-muscle(Myh10)                    | Mus musculus |
| My112b | myosin, light chain 12B, regulatory(My112b)                        | Mus musculus |
| Mtpn   | myotrophin(Mtpn)                                                   | Mus musculus |
| Marcks | myristoylated alanine rich protein kinase C substrate(Marcks)      | Mus musculus |
| Ncam1  | neural cell adhesion molecule 1(Ncam1)                             | Mus musculus |
| Ncald  | neurocalcin delta(Ncald)                                           | Mus musculus |
| Nfasc  | neurofascin(Nfasc)                                                 | Mus musculus |
| Ncs1   | neuronal calcium sensor 1(Ncs1)                                    | Mus musculus |
| Negr1  | neuronal growth regulator 1(Negr1)                                 | Mus musculus |
| Ncstn  | nicastrin(Ncstn)                                                   | Mus musculus |
| Nutf2  | nuclear transport factor 2(Nutf2)                                  | Mus musculus |
| Nucb1  | nucleobindin 1(Nucb1)                                              | Mus musculus |
| Nucb2  | nucleobindin 2(Nucb2)                                              | Mus musculus |
| Ppt1   | palmitoyl-protein thioesterase 1(Ppt1)                             | Mus musculus |
| Pvalb  | parvalbumin(Pvalb)                                                 | Mus musculus |
| Pef1   | penta-EF hand domain containing 1(Pef1)                            | Mus musculus |
| Pepd   | peptidase D(Pepd)                                                  | Mus musculus |
| Pam    | peptidylglycine alpha-amidating monooxygenase(Pam)                 | Mus musculus |
| Ppia   | peptidylprolyl isomerase A(Ppia)                                   | Mus musculus |
| Ppib   | peptidylprolyl isomerase B(Ppib)                                   | Mus musculus |
| Prdx1  | peroxiredoxin 1(Prdx1)                                             | Mus musculus |
| Prdx2  | peroxiredoxin 2(Prdx2)                                             | Mus musculus |
| Prdx3  | peroxiredoxin 3(Prdx3)                                             | Mus musculus |
| Prdx4  | peroxiredoxin 4(Prdx4)                                             | Mus musculus |
| Prdx5  | peroxiredoxin 5(Prdx5)                                             | Mus musculus |
| Prdx6  | peroxiredoxin 6(Prdx6)                                             | Mus musculus |
| Pebp1  | phosphatidylethanolamine binding protein 1(Pebp1)                  | Mus musculus |
| Pi4ka  | phosphatidylinositol 4-kinase, catalytic, alpha polypeptide(Pi4ka) | Mus musculus |
| Pitpna | phosphatidylinositol transfer protein, alpha(Pitpna)               | Mus musculus |
| Pitpnb | phosphatidylinositol transfer protein, beta(Pitpnb)                | Mus musculus |
| Pfkl   | phosphofructokinase, liver, B-type(Pfkl)                           | Mus musculus |
| Pfkm   | phosphofructokinase, muscle(Pfkm)                                  | Mus musculus |
| Pfkp   | phosphofructokinase, platelet(Pfkp)                                | Mus musculus |
| Pgm1   | phosphoglucomutase 1(Pgm1)                                         | Mus musculus |

## SUPPLEMENTARY DATA

|          |                                                                                                                             |              |
|----------|-----------------------------------------------------------------------------------------------------------------------------|--------------|
| Pgd      | phosphogluconate dehydrogenase(Pgd)                                                                                         | Mus musculus |
| Pgk1     | phosphoglycerate kinase 1(Pgk1)                                                                                             | Mus musculus |
| Pgam1    | phosphoglycerate mutase 1(Pgam1)                                                                                            | Mus musculus |
| Phpt1    | phosphohistidine phosphatase 1(Phpt1)                                                                                       | Mus musculus |
| Plcb1    | phospholipase C, beta 1(Plcb1)                                                                                              | Mus musculus |
| Pld3     | phospholipase D family, member 3(Pld3)                                                                                      | Mus musculus |
| Prps2    | phosphoribosyl pyrophosphate synthetase 2(Prps2)                                                                            | Mus musculus |
| Paics    | phosphoribosylaminoimidazole carboxylase,<br>phosphoribosylaminoribosylaminoimidazole, succinocarboxamide synthetase(Paics) | Mus musculus |
| Psat1    | phosphoserine aminotransferase 1(Psat1)                                                                                     | Mus musculus |
| Pafah1b1 | platelet-activating factor acetylhydrolase, isoform 1b, subunit 1(Pafah1b1)                                                 | Mus musculus |
| Pafah1b2 | platelet-activating factor acetylhydrolase, isoform 1b, subunit 2(Pafah1b2)                                                 | Mus musculus |
| Plxna1   | plexin A1(Plxna1)                                                                                                           | Mus musculus |
| Plxnb2   | plexin B2(Plxnb2)                                                                                                           | Mus musculus |
| Pcbp1    | poly(rC) binding protein 1(Pcbp1)                                                                                           | Mus musculus |
| Kcnma1   | potassium large conductance calcium-activated channel, subfamily M, alpha member 1(Kcnma1)                                  | Mus musculus |
| Pcyox1   | prenylcysteine oxidase 1(Pcyox1)                                                                                            | Mus musculus |
| Prnp     | prion protein(Prnp)                                                                                                         | Mus musculus |
| Pfn2     | profilin 2(Pfn2)                                                                                                            | Mus musculus |
| Pdcd6ip  | programmed cell death 6 interacting protein(Pdcd6ip)                                                                        | Mus musculus |
| Pdcd6    | programmed cell death 6(Pdcd6)                                                                                              | Mus musculus |
| Phb2     | prohibitin 2(Phb2)                                                                                                          | Mus musculus |
| Phb      | prohibitin(Phb)                                                                                                             | Mus musculus |
| P4hb     | prolyl 4-hydroxylase, beta polypeptide(P4hb)                                                                                | Mus musculus |
| Prom1    | prominin 1(Prom1)                                                                                                           | Mus musculus |
| Pcsk1n   | proprotein convertase subtilisin/kexin type 1 inhibitor(Pcsk1n)                                                             | Mus musculus |
| Psap     | prosaposin(Psap)                                                                                                            | Mus musculus |
| Ptges3   | prostaglandin E synthase 3 (cytosolic)(Ptges3)                                                                              | Mus musculus |
| Psm12    | proteasome (prosome, macropain) 26S subunit, non-ATPase, 12(Psm12)                                                          | Mus musculus |
| Psm1     | proteasome (prosome, macropain) subunit, alpha type 1(Psm1)                                                                 | Mus musculus |
| Psm2     | proteasome (prosome, macropain) subunit, alpha type 2(Psm2)                                                                 | Mus musculus |
| Psm3     | proteasome (prosome, macropain) subunit, alpha type 3(Psm3)                                                                 | Mus musculus |
| Psm4     | proteasome (prosome, macropain) subunit, alpha type 4(Psm4)                                                                 | Mus musculus |
| Psm5     | proteasome (prosome, macropain) subunit, alpha type 5(Psm5)                                                                 | Mus musculus |
| Psm6     | proteasome (prosome, macropain) subunit, alpha type 6(Psm6)                                                                 | Mus musculus |
| Psm7     | proteasome (prosome, macropain) subunit, alpha type 7(Psm7)                                                                 | Mus musculus |
| Psm1     | proteasome (prosome, macropain) subunit, beta type 1(Psm1)                                                                  | Mus musculus |
| Psm3     | proteasome (prosome, macropain) subunit, beta type 3(Psm3)                                                                  | Mus musculus |
| Psm4     | proteasome (prosome, macropain) subunit, beta type 4(Psm4)                                                                  | Mus musculus |
| Psm5     | proteasome (prosome, macropain) subunit, beta type 5(Psm5)                                                                  | Mus musculus |

## SUPPLEMENTARY DATA

|         |                                                                               |              |
|---------|-------------------------------------------------------------------------------|--------------|
| Psmb6   | proteasome (prosome, macropain) subunit, beta type 6(Psmb6)                   | Mus musculus |
| Psmb7   | proteasome (prosome, macropain) subunit, beta type 7(Psmb7)                   | Mus musculus |
| Pdia3   | protein disulfide isomerase associated 3(Pdia3)                               | Mus musculus |
| Pdia6   | protein disulfide isomerase associated 6(Pdia6)                               | Mus musculus |
| Pacsin2 | protein kinase C and casein kinase substrate in neurons 2(Pacsin2)            | Mus musculus |
| Prkca   | protein kinase C, alpha(Prkca)                                                | Mus musculus |
| Prkcb   | protein kinase C, beta(Prkcb)                                                 | Mus musculus |
| Prkar2a | protein kinase, cAMP dependent regulatory, type II alpha(Prkar2a)             | Mus musculus |
| Prkar2b | protein kinase, cAMP dependent regulatory, type II beta(Prkar2b)              | Mus musculus |
| Prkaca  | protein kinase, cAMP dependent, catalytic, alpha(Prkaca)                      | Mus musculus |
| Prkacb  | protein kinase, cAMP dependent, catalytic, beta(Prkacb)                       | Mus musculus |
| Ppp1ca  | protein phosphatase 1, catalytic subunit, alpha isoform(Ppp1ca)               | Mus musculus |
| Ppp1cb  | protein phosphatase 1, catalytic subunit, beta isoform(Ppp1cb)                | Mus musculus |
| Ppp1r7  | protein phosphatase 1, regulatory (inhibitor) subunit 7(Ppp1r7)               | Mus musculus |
| Ppp2ca  | protein phosphatase 2 (formerly 2A), catalytic subunit, alpha isoform(Ppp2ca) | Mus musculus |
| Ppp2r1a | protein phosphatase 2, regulatory subunit A, alpha(Ppp2r1a)                   | Mus musculus |
| Ptpra   | protein tyrosine phosphatase, receptor type, A(Ptpra)                         | Mus musculus |
| Ptprd   | protein tyrosine phosphatase, receptor type, D(Ptprd)                         | Mus musculus |
| Ptprj   | protein tyrosine phosphatase, receptor type, J(Ptprj)                         | Mus musculus |
| Ptprs   | protein tyrosine phosphatase, receptor type, S(Ptprs)                         | Mus musculus |
| Ptma    | prothymosin alpha(Ptma)                                                       | Mus musculus |
| Pdxk    | pyridoxal (pyridoxine, vitamin B6) kinase(Pdxk)                               | Mus musculus |
| Pdpx    | pyridoxal (pyridoxine, vitamin B6) phosphatase(Pdpx)                          | Mus musculus |
| Ppa1    | pyrophosphatase (inorganic) 1(Ppa1)                                           | Mus musculus |
| Ppa2    | pyrophosphatase (inorganic) 2(Ppa2)                                           | Mus musculus |
| Pkm     | pyruvate kinase, muscle(Pkm)                                                  | Mus musculus |
| Qdpr    | quinoid dihydropteridine reductase(Qdpr)                                      | Mus musculus |
| Rdx     | radixin(Rdx)                                                                  | Mus musculus |
| Rhoa    | ras homolog family member A(Rhoa)                                             | Mus musculus |
| Rhob    | ras homolog family member B(Rhob)                                             | Mus musculus |
| Rhoc    | ras homolog family member C(Rhoc)                                             | Mus musculus |
| Rhog    | ras homolog family member G(Rhog)                                             | Mus musculus |
| Reep5   | receptor accessory protein 5(Reep5)                                           | Mus musculus |
| Rras2   | related RAS viral (r-ras) oncogene 2(Rras2)                                   | Mus musculus |
| Rras    | related RAS viral (r-ras) oncogene(Rras)                                      | Mus musculus |
| Rtn3    | reticulon 3(Rtn3)                                                             | Mus musculus |
| Rtn4    | reticulon 4(Rtn4)                                                             | Mus musculus |
| Rpl10a  | ribosomal protein L10A(Rpl10a)                                                | Mus musculus |
| Rps27a  | ribosomal protein S27A(Rps27a)                                                | Mus musculus |
| Ryr2    | ryanodine receptor 2, cardiac(Ryr2)                                           | Mus musculus |

## SUPPLEMENTARY DATA

|           |                                                                                                                 |              |
|-----------|-----------------------------------------------------------------------------------------------------------------|--------------|
| Scarb2    | scavenger receptor class B, member 2(Scarb2)                                                                    | Mus musculus |
| Spr       | sepiapterin reductase(Spr)                                                                                      | Mus musculus |
| Serpina1a | serine (or cysteine) peptidase inhibitor, clade A, member 1A(Serpina1a)                                         | Mus musculus |
| Serpina1c | serine (or cysteine) peptidase inhibitor, clade A, member 1C(Serpina1c)                                         | Mus musculus |
| Serpina1e | serine (or cysteine) peptidase inhibitor, clade A, member 1E(Serpina1e)                                         | Mus musculus |
| Serpina3k | serine (or cysteine) peptidase inhibitor, clade A, member 3K(Serpina3k)                                         | Mus musculus |
| Serpnb1a  | serine (or cysteine) peptidase inhibitor, clade B, member 1a(Serpnb1a)                                          | Mus musculus |
| Serpini1  | serine (or cysteine) peptidase inhibitor, clade I, member 1(Serpini1)                                           | Mus musculus |
| Serinc1   | serine incorporator 1(Serinc1)                                                                                  | Mus musculus |
| Sars      | seryl-aminoacyl-tRNA synthetase(Sars)                                                                           | Mus musculus |
| Ssr4      | signal sequence receptor, delta(Ssr4)                                                                           | Mus musculus |
| Sirpa     | signal-regulatory protein alpha(Sirpa)                                                                          | Mus musculus |
| Slc1a4    | solute carrier family 1 (glutamate/neutral amino acid transporter), member 4(Slc1a4)                            | Mus musculus |
| Slc1a1    | solute carrier family 1 (neuronal/epithelial high affinity glutamate transporter, system Xag), member 1(Slc1a1) | Mus musculus |
| Slc12a2   | solute carrier family 12, member 2(Slc12a2)                                                                     | Mus musculus |
| Slc15a2   | solute carrier family 15 (H <sup>+</sup> /peptide transporter), member 2(Slc15a2)                               | Mus musculus |
| Slc16a1   | solute carrier family 16 (monocarboxylic acid transporters), member 1(Slc16a1)                                  | Mus musculus |
| Slc2a1    | solute carrier family 2 (facilitated glucose transporter), member 1(Slc2a1)                                     | Mus musculus |
| Slc2a3    | solute carrier family 2 (facilitated glucose transporter), member 3(Slc2a3)                                     | Mus musculus |
| Slc25a5   | solute carrier family 25 (mitochondrial carrier, adenine nucleotide translocator), member 5(Slc25a5)            | Mus musculus |
| Slc25a3   | solute carrier family 25 (mitochondrial carrier, phosphate carrier), member 3(Slc25a3)                          | Mus musculus |
| Slc3a2    | solute carrier family 3 (activators of dibasic and neutral amino acid transport), member 2(Slc3a2)              | Mus musculus |
| Slc30a7   | solute carrier family 30 (zinc transporter), member 7(Slc30a7)                                                  | Mus musculus |
| Slc4a4    | solute carrier family 4 (anion exchanger), member 4(Slc4a4)                                                     | Mus musculus |
| Slc44a1   | solute carrier family 44, member 1(Slc44a1)                                                                     | Mus musculus |
| Slc44a2   | solute carrier family 44, member 2(Slc44a2)                                                                     | Mus musculus |
| Slc7a5    | solute carrier family 7 (cationic amino acid transporter, y <sup>+</sup> system), member 5(Slc7a5)              | Mus musculus |
| Slc7a8    | solute carrier family 7 (cationic amino acid transporter, y <sup>+</sup> system), member 8(Slc7a8)              | Mus musculus |
| Slc9a1    | solute carrier family 9 (sodium/hydrogen exchanger), member 1(Slc9a1)                                           | Mus musculus |
| Slc9a3r1  | solute carrier family 9 (sodium/hydrogen exchanger), member 3 regulator 1(Slc9a3r1)                             | Mus musculus |
| Sri       | sorcin(Sri)                                                                                                     | Mus musculus |
| Sorl1     | sortilin-related receptor, LDLR class A repeats-containing(Sorl1)                                               | Mus musculus |
| Sptan1    | spectrin alpha, non-erythrocytic 1(Sptan1)                                                                      | Mus musculus |
| Sptbn1    | spectrin beta, non-erythrocytic 1(Sptbn1)                                                                       | Mus musculus |
| Smpd13b   | sphingomyelin phosphodiesterase, acid-like 3B(Smpd13b)                                                          | Mus musculus |
| Stmn1     | stathmin 1(Stmn1)                                                                                               | Mus musculus |
| Sdf4      | stromal cell derived factor 4(Sdf4)                                                                             | Mus musculus |
| Sdhb      | succinate dehydrogenase complex, subunit B, iron sulfur (Ip)(Sdhb)                                              | Mus musculus |
| Suclg1    | succinate-CoA ligase, GDP-forming, alpha subunit(Suclg1)                                                        | Mus musculus |

## SUPPLEMENTARY DATA

|         |                                                                        |              |
|---------|------------------------------------------------------------------------|--------------|
| Sucla2  | succinate-Coenzyme A ligase, ADP-forming, beta subunit(Sucla2)         | Mus musculus |
| Sod1    | superoxide dismutase 1, soluble(Sod1)                                  | Mus musculus |
| Sod2    | superoxide dismutase 2, mitochondrial(Sod2)                            | Mus musculus |
| St13    | suppression of tumorigenicity 13(St13)                                 | Mus musculus |
| Susd2   | sushi domain containing 2(Susd2)                                       | Mus musculus |
| Syt7    | synaptotagmin VII(Syt7)                                                | Mus musculus |
| Sdcbp   | syndecan binding protein(Sdcbp)                                        | Mus musculus |
| Stx12   | syntaxin 12(Stx12)                                                     | Mus musculus |
| Stxbp1  | syntaxin binding protein 1(Stxbp1)                                     | Mus musculus |
| Tcp1    | t-complex protein 1(Tcp1)                                              | Mus musculus |
| Txndc5  | thioredoxin domain containing 5(Txndc5)                                | Mus musculus |
| Txnrd1  | thioredoxin reductase 1(Txnrd1)                                        | Mus musculus |
| Thy1    | thymus cell antigen 1, theta(Thy1)                                     | Mus musculus |
| Tollip  | toll interacting protein(Tollip)                                       | Mus musculus |
| Taldo1  | transaldolase 1(Taldo1)                                                | Mus musculus |
| Tfrc    | transferrin receptor(Tfrc)                                             | Mus musculus |
| Tkt     | transketolase(Tkt)                                                     | Mus musculus |
| Tomm40  | translocase of outer mitochondrial membrane 40 homolog (yeast)(Tomm40) | Mus musculus |
| Tm9sf2  | transmembrane 9 superfamily member 2(Tm9sf2)                           | Mus musculus |
| Tmed10  | transmembrane p24 trafficking protein 10(Tmed10)                       | Mus musculus |
| Tmed4   | transmembrane p24 trafficking protein 4(Tmed4)                         | Mus musculus |
| Tmed9   | transmembrane p24 trafficking protein 9(Tmed9)                         | Mus musculus |
| Tmem109 | transmembrane protein 109(Tmem109)                                     | Mus musculus |
| Tmem33  | transmembrane protein 33(Tmem33)                                       | Mus musculus |
| Ttr     | transthyretin(Ttr)                                                     | Mus musculus |
| Tpi1    | triosephosphate isomerase 1(Tpi1)                                      | Mus musculus |
| Tpm3    | tropomyosin 3, gamma(Tpm3)                                             | Mus musculus |
| Wars    | tryptophanyl-tRNA synthetase(Wars)                                     | Mus musculus |
| Tppp3   | tubulin polymerization-promoting protein family member 3(Tppp3)        | Mus musculus |
| Tuba1a  | tubulin, alpha 1A(Tuba1a)                                              | Mus musculus |
| Tuba1b  | tubulin, alpha 1B(Tuba1b)                                              | Mus musculus |
| Tuba4a  | tubulin, alpha 4A(Tuba4a)                                              | Mus musculus |
| Tubb2a  | tubulin, beta 2A class IIA(Tubb2a)                                     | Mus musculus |
| Tubb3   | tubulin, beta 3 class III(Tubb3)                                       | Mus musculus |
| Tubb4a  | tubulin, beta 4A class IVA(Tubb4a)                                     | Mus musculus |
| Tubb4b  | tubulin, beta 4B class IVB(Tubb4b)                                     | Mus musculus |
| Tubb5   | tubulin, beta 5 class I(Tubb5)                                         | Mus musculus |
| Tpt1    | tumor protein, translationally-controlled 1(Tpt1)                      | Mus musculus |
| Ttyh3   | tweety family member 3(Ttyh3)                                          | Mus musculus |

## SUPPLEMENTARY DATA

|          |                                                                                                    |              |
|----------|----------------------------------------------------------------------------------------------------|--------------|
| Ywhab    | tyrosine 3-monooxygenase/tryptophan 5-monooxygenase activation protein, beta polypeptide(Ywhab)    | Mus musculus |
| Ywhae    | tyrosine 3-monooxygenase/tryptophan 5-monooxygenase activation protein, epsilon polypeptide(Ywhae) | Mus musculus |
| Ywhah    | tyrosine 3-monooxygenase/tryptophan 5-monooxygenase activation protein, eta polypeptide(Ywhah)     | Mus musculus |
| Ywhag    | tyrosine 3-monooxygenase/tryptophan 5-monooxygenase activation protein, gamma polypeptide(Ywhag)   | Mus musculus |
| Ywhaq    | tyrosine 3-monooxygenase/tryptophan 5-monooxygenase activation protein, theta polypeptide(Ywhaq)   | Mus musculus |
| Ywhaz    | tyrosine 3-monooxygenase/tryptophan 5-monooxygenase activation protein, zeta polypeptide(Ywhaz)    | Mus musculus |
| Uqcrc2   | ubiquinol cytochrome c reductase core protein 2(Uqcrc2)                                            | Mus musculus |
| Uqcr10   | ubiquinol-cytochrome c reductase, complex III subunit X(Uqcr10)                                    | Mus musculus |
| Ubc      | ubiquitin C(Ubc)                                                                                   | Mus musculus |
| Uchl1    | ubiquitin carboxy-terminal hydrolase L1(Uchl1)                                                     | Mus musculus |
| Uchl3    | ubiquitin carboxyl-terminal esterase L3 (ubiquitin thiolesterase)(Uchl3)                           | Mus musculus |
| Usp14    | ubiquitin specific peptidase 14(Usp14)                                                             | Mus musculus |
| Ube2v1   | ubiquitin-conjugating enzyme E2 variant 1(Ube2v1)                                                  | Mus musculus |
| Ube2v2   | ubiquitin-conjugating enzyme E2 variant 2(Ube2v2)                                                  | Mus musculus |
| Ube2n    | ubiquitin-conjugating enzyme E2N(Ube2n)                                                            | Mus musculus |
| Uba1     | ubiquitin-like modifier activating enzyme 1(Uba1)                                                  | Mus musculus |
| Usmg5    | upregulated during skeletal muscle growth 5(Usmg5)                                                 | Mus musculus |
| Rala     | v-ral simian leukemia viral oncogene A (ras related)(Rala)                                         | Mus musculus |
| Vcp      | valosin containing protein(Vcp)                                                                    | Mus musculus |
| Vcam1    | vascular cell adhesion molecule 1(Vcam1)                                                           | Mus musculus |
| Vamp2    | vesicle-associated membrane protein 2(Vamp2)                                                       | Mus musculus |
| Vdac1    | voltage-dependent anion channel 1(Vdac1)                                                           | Mus musculus |
| Vdac2    | voltage-dependent anion channel 2(Vdac2)                                                           | Mus musculus |
| Vdac3    | voltage-dependent anion channel 3(Vdac3)                                                           | Mus musculus |
| Zmpste24 | zinc metallopeptidase, STE24(Zmpste24)                                                             | Mus musculus |

# SUPPLEMENTARY DATA

**Supplementary Table 3.** DAVID Platform: Brain tissue-related proteins present in our dataset.

| Official gene symbol | Gene name                                                                            | Species      |
|----------------------|--------------------------------------------------------------------------------------|--------------|
| Cnp                  | 2',3'-cyclic nucleotide 3' phosphodiesterase(Cnp)                                    | Mus musculus |
| Hacd2                | 3-hydroxyacyl-CoA dehydratase 2(Hacd2)                                               | Mus musculus |
| Hacd3                | 3-hydroxyacyl-CoA dehydratase 3(Hacd3)                                               | Mus musculus |
| Bdh1                 | 3-hydroxybutyrate dehydrogenase, type 1(Bdh1)                                        | Mus musculus |
| Oxct1                | 3-oxoacid CoA transferase 1(Oxct1)                                                   | Mus musculus |
| Phgdh                | 3-phosphoglycerate dehydrogenase(Phgdh)                                              | Mus musculus |
| Abat                 | 4-aminobutyrate aminotransferase(Abat)                                               | Mus musculus |
| Nt5e                 | 5' nucleotidase, ecto(Nt5e)                                                          | Mus musculus |
| Arf1                 | ADP-ribosylation factor 1(Arf1)                                                      | Mus musculus |
| Arf2                 | ADP-ribosylation factor 2(Arf2)                                                      | Mus musculus |
| Arf3                 | ADP-ribosylation factor 3(Arf3)                                                      | Mus musculus |
| Arf5                 | ADP-ribosylation factor 5(Arf5)                                                      | Mus musculus |
| Arf6                 | ADP-ribosylation factor 6(Arf6)                                                      | Mus musculus |
| Arl6ip1              | ADP-ribosylation factor-like 6 interacting protein 1(Arl6ip1)                        | Mus musculus |
| Actr1b               | ARP1 actin-related protein 1B, centractin beta(Actr1b)                               | Mus musculus |
| Actr2                | ARP2 actin-related protein 2(Actr2)                                                  | Mus musculus |
| Actr3                | ARP3 actin-related protein 3(Actr3)                                                  | Mus musculus |
| Acly                 | ATP citrate lyase(Acly)                                                              | Mus musculus |
| Atp5b                | ATP synthase, H+ transporting mitochondrial F1 complex, beta subunit(Atp5b)          | Mus musculus |
| Atp5f1               | ATP synthase, H+ transporting, mitochondrial F0 complex, subunit B1(Atp5f1)          | Mus musculus |
| Atp5h                | ATP synthase, H+ transporting, mitochondrial F0 complex, subunit D(Atp5h)            | Mus musculus |
| Atp5j2               | ATP synthase, H+ transporting, mitochondrial F0 complex, subunit F2(Atp5j2)          | Mus musculus |
| Atp5l                | ATP synthase, H+ transporting, mitochondrial F0 complex, subunit G(Atp5l)            | Mus musculus |
| Atp5o                | ATP synthase, H+ transporting, mitochondrial F1 complex, O subunit(Atp5o)            | Mus musculus |
| Atp5a1               | ATP synthase, H+ transporting, mitochondrial F1 complex, alpha subunit 1(Atp5a1)     | Mus musculus |
| Atp5c1               | ATP synthase, H+ transporting, mitochondrial F1 complex, gamma polypeptide 1(Atp5c1) | Mus musculus |
| Atp2a2               | ATPase, Ca++ transporting, cardiac muscle, slow twitch 2(Atp2a2)                     | Mus musculus |
| Atp2b2               | ATPase, Ca++ transporting, plasma membrane 2(Atp2b2)                                 | Mus musculus |
| Atp6v0a1             | ATPase, H+ transporting, lysosomal V0 subunit A1(Atp6v0a1)                           | Mus musculus |
| Atp6v0c              | ATPase, H+ transporting, lysosomal V0 subunit C(Atp6v0c)                             | Mus musculus |
| Atp6v0d1             | ATPase, H+ transporting, lysosomal V0 subunit D1(Atp6v0d1)                           | Mus musculus |
| Atp6v1a              | ATPase, H+ transporting, lysosomal V1 subunit A(Atp6v1a)                             | Mus musculus |
| Atp6v1b2             | ATPase, H+ transporting, lysosomal V1 subunit B2(Atp6v1b2)                           | Mus musculus |
| Atp6v1c1             | ATPase, H+ transporting, lysosomal V1 subunit C1(Atp6v1c1)                           | Mus musculus |
| Atp6v1d              | ATPase, H+ transporting, lysosomal V1 subunit D(Atp6v1d)                             | Mus musculus |



## SUPPLEMENTARY DATA

|           |                                                                                               |              |
|-----------|-----------------------------------------------------------------------------------------------|--------------|
| Atp6v1e1  | ATPase, H <sup>+</sup> transporting, lysosomal V1 subunit E1(Atp6v1e1)                        | Mus musculus |
| Atp6v1h   | ATPase, H <sup>+</sup> transporting, lysosomal V1 subunit H(Atp6v1h)                          | Mus musculus |
| Atp6ap1   | ATPase, H <sup>+</sup> transporting, lysosomal accessory protein 1(Atp6ap1)                   | Mus musculus |
| Atp1a1    | ATPase, Na <sup>+</sup> /K <sup>+</sup> transporting, alpha 1 polypeptide(Atp1a1)             | Mus musculus |
| Atp1a2    | ATPase, Na <sup>+</sup> /K <sup>+</sup> transporting, alpha 2 polypeptide(Atp1a2)             | Mus musculus |
| Atp1a3    | ATPase, Na <sup>+</sup> /K <sup>+</sup> transporting, alpha 3 polypeptide(Atp1a3)             | Mus musculus |
| Atp1b1    | ATPase, Na <sup>+</sup> /K <sup>+</sup> transporting, beta 1 polypeptide(Atp1b1)              | Mus musculus |
| Atp1b2    | ATPase, Na <sup>+</sup> /K <sup>+</sup> transporting, beta 2 polypeptide(Atp1b2)              | Mus musculus |
| Atp1b3    | ATPase, Na <sup>+</sup> /K <sup>+</sup> transporting, beta 3 polypeptide(Atp1b3)              | Mus musculus |
| Atp8a1    | ATPase, aminophospholipid transporter (APLT), class I, type 8A, member 1(Atp8a1)              | Mus musculus |
| Atp9a     | ATPase, class II, type 9A(Atp9a)                                                              | Mus musculus |
| Auh       | AU RNA binding protein/enoyl-coenzyme A hydratase(Auh)                                        | Mus musculus |
| Cap2      | CAP, adenylate cyclase-associated protein, 2 (yeast)(Cap2)                                    | Mus musculus |
| Cd200     | CD200 antigen(Cd200)                                                                          | Mus musculus |
| Cd47      | CD47 antigen (Rh-related antigen, integrin-associated signal transducer)(Cd47)                | Mus musculus |
| Cd81      | CD81 antigen(Cd81)                                                                            | Mus musculus |
| Cd82      | CD82 antigen(Cd82)                                                                            | Mus musculus |
| Cd9       | CD9 antigen(Cd9)                                                                              | Mus musculus |
| Cisd1     | CDGSH iron sulfur domain 1(Cisd1)                                                             | Mus musculus |
| Cdipt     | CDP-diacylglycerol--inositol 3-phosphatidyltransferase (phosphatidylinositol synthase)(Cdipt) | Mus musculus |
| Cops5     | COP9 signalosome subunit 5(Cops5)                                                             | Mus musculus |
| Cadps     | Ca <sup>2+</sup> -dependent secretion activator(Cadps)                                        | Mus musculus |
| Camkv     | CaM kinase-like vesicle-associated(Camkv)                                                     | Mus musculus |
| Ddx39b    | DEAD (Asp-Glu-Ala-Asp) box polypeptide 39B(Ddx39b)                                            | Mus musculus |
| Diras2    | DIRAS family, GTP-binding RAS-like 2(Diras2)                                                  | Mus musculus |
| D10Jhu81e | DNA segment, Chr 10, Johns Hopkins University 81 expressed(D10Jhu81e)                         | Mus musculus |
| Dmxl2     | Dmx-like 2(Dmxl2)                                                                             | Mus musculus |
| Dnaja1    | DnaJ heat shock protein family (Hsp40) member A1(Dnaja1)                                      | Mus musculus |
| Dnajc16   | DnaJ heat shock protein family (Hsp40) member C16(Dnajc16)                                    | Mus musculus |
| Dnajc5    | DnaJ heat shock protein family (Hsp40) member C5(Dnajc5)                                      | Mus musculus |
| Dnajc6    | DnaJ heat shock protein family (Hsp40) member C6(Dnajc6)                                      | Mus musculus |
| Efhd2     | EF hand domain containing 2(Efhd2)                                                            | Mus musculus |
| Edil3     | EGF-like repeats and discoidin I-like domains 3(Edil3)                                        | Mus musculus |
| Ehd3      | EH-domain containing 3(Ehd3)                                                                  | Mus musculus |
| Emc1      | ER membrane protein complex subunit 1(Emc1)                                                   | Mus musculus |
| Epha4     | Eph receptor A4(Epha4)                                                                        | Mus musculus |
| Fxyd6     | FXDY domain-containing ion transport regulator 6(Fxyd6)                                       | Mus musculus |
| Fyn       | Fyn proto-oncogene(Fyn)                                                                       | Mus musculus |
| Gpr158    | G protein-coupled receptor 158(Gpr158)                                                        | Mus musculus |

## SUPPLEMENTARY DATA

|         |                                                                                  |              |
|---------|----------------------------------------------------------------------------------|--------------|
| Gpr37   | G protein-coupled receptor 37(Gpr37)                                             | Mus musculus |
| Gnas    | GNAS (guanine nucleotide binding protein, alpha stimulating) complex locus(Gnas) | Mus musculus |
| Hras    | Harvey rat sarcoma virus oncogene(Hras)                                          | Mus musculus |
| Kras    | Kirsten rat sarcoma viral oncogene homolog(Kras)                                 | Mus musculus |
| L1cam   | L1 cell adhesion molecule(L1cam)                                                 | Mus musculus |
| Lmbrd2  | LMBR1 domain containing 2(Lmbrd2)                                                | Mus musculus |
| Lancl1  | LanC (bacterial lantibiotic synthetase component C)-like 1(Lancl1)               | Mus musculus |
| Lancl2  | LanC (bacterial lantibiotic synthetase component C)-like 2(Lancl2)               | Mus musculus |
| Asah1   | N-acylsphingosine amidohydrolase 1(Asah1)                                        | Mus musculus |
| Napa    | N-ethylmaleimide sensitive fusion protein attachment protein alpha(Napa)         | Mus musculus |
| Napb    | N-ethylmaleimide sensitive fusion protein attachment protein beta(Napb)          | Mus musculus |
| Nsf     | N-ethylmaleimide sensitive fusion protein(Nsf)                                   | Mus musculus |
| Ndrgl1  | N-myc downstream regulated gene 1(Ndrgl1)                                        | Mus musculus |
| Ndrgl2  | N-myc downstream regulated gene 2(Ndrgl2)                                        | Mus musculus |
| Ndufa10 | NADH dehydrogenase (ubiquinone) 1 alpha subcomplex 10(Ndufa10)                   | Mus musculus |
| Ndufa11 | NADH dehydrogenase (ubiquinone) 1 alpha subcomplex 11(Ndufa11)                   | Mus musculus |
| Ndufa13 | NADH dehydrogenase (ubiquinone) 1 alpha subcomplex, 13(Ndufa13)                  | Mus musculus |
| Ndufa2  | NADH dehydrogenase (ubiquinone) 1 alpha subcomplex, 2(Ndufa2)                    | Mus musculus |
| Ndufa4  | NADH dehydrogenase (ubiquinone) 1 alpha subcomplex, 4(Ndufa4)                    | Mus musculus |
| Ndufa5  | NADH dehydrogenase (ubiquinone) 1 alpha subcomplex, 5(Ndufa5)                    | Mus musculus |
| Ndufa6  | NADH dehydrogenase (ubiquinone) 1 alpha subcomplex, 6 (B14)(Ndufa6)              | Mus musculus |
| Ndufa8  | NADH dehydrogenase (ubiquinone) 1 alpha subcomplex, 8(Ndufa8)                    | Mus musculus |
| Ndufa9  | NADH dehydrogenase (ubiquinone) 1 alpha subcomplex, 9(Ndufa9)                    | Mus musculus |
| Ndufb3  | NADH dehydrogenase (ubiquinone) 1 beta subcomplex 3(Ndufb3)                      | Mus musculus |
| Ndufb4  | NADH dehydrogenase (ubiquinone) 1 beta subcomplex 4(Ndufb4)                      | Mus musculus |
| Ndufb8  | NADH dehydrogenase (ubiquinone) 1 beta subcomplex 8(Ndufb8)                      | Mus musculus |
| Ndufb10 | NADH dehydrogenase (ubiquinone) 1 beta subcomplex, 10(Ndufb10)                   | Mus musculus |
| Ndufb11 | NADH dehydrogenase (ubiquinone) 1 beta subcomplex, 11(Ndufb11)                   | Mus musculus |
| Ndufb5  | NADH dehydrogenase (ubiquinone) 1 beta subcomplex, 5(Ndufb5)                     | Mus musculus |
| Ndufb7  | NADH dehydrogenase (ubiquinone) 1 beta subcomplex, 7(Ndufb7)                     | Mus musculus |
| Ndufb9  | NADH dehydrogenase (ubiquinone) 1 beta subcomplex, 9(Ndufb9)                     | Mus musculus |
| Ndufc2  | NADH dehydrogenase (ubiquinone) 1, subcomplex unknown, 2(Ndufc2)                 | Mus musculus |
| Ndufs1  | NADH dehydrogenase (ubiquinone) Fe-S protein 1(Ndufs1)                           | Mus musculus |
| Ndufs2  | NADH dehydrogenase (ubiquinone) Fe-S protein 2(Ndufs2)                           | Mus musculus |
| Ndufs3  | NADH dehydrogenase (ubiquinone) Fe-S protein 3(Ndufs3)                           | Mus musculus |
| Ndufs5  | NADH dehydrogenase (ubiquinone) Fe-S protein 5(Ndufs5)                           | Mus musculus |
| Ndufs7  | NADH dehydrogenase (ubiquinone) Fe-S protein 7(Ndufs7)                           | Mus musculus |
| Ndufs8  | NADH dehydrogenase (ubiquinone) Fe-S protein 8(Ndufs8)                           | Mus musculus |
| Ndufv1  | NADH dehydrogenase (ubiquinone) flavoprotein 1(Ndufv1)                           | Mus musculus |
| Nckap1  | NCK-associated protein 1(Nckap1)                                                 | Mus musculus |

## SUPPLEMENTARY DATA

|         |                                                             |              |
|---------|-------------------------------------------------------------|--------------|
| Nme1    | NME/NM23 nucleoside diphosphate kinase 1(Nme1)              | Mus musculus |
| Nme2    | NME/NM23 nucleoside diphosphate kinase 2(Nme2)              | Mus musculus |
| Nsfl1c  | NSFL1 (p97) cofactor (p47)(Nsfl1c)                          | Mus musculus |
| Npc1    | Niemann-Pick type C1(Npc1)                                  | Mus musculus |
| Ola1    | Obg-like ATPase 1(Ola1)                                     | Mus musculus |
| Pcp4    | Purkinje cell protein 4(Pcp4)                               | Mus musculus |
| Rab10   | RAB10, member RAS oncogene family(Rab10)                    | Mus musculus |
| Rab11a  | RAB11A, member RAS oncogene family(Rab11a)                  | Mus musculus |
| Rab11b  | RAB11B, member RAS oncogene family(Rab11b)                  | Mus musculus |
| Rab14   | RAB14, member RAS oncogene family(Rab14)                    | Mus musculus |
| Rab18   | RAB18, member RAS oncogene family(Rab18)                    | Mus musculus |
| Rab1A   | RAB1A, member RAS oncogene family(Rab1a)                    | Mus musculus |
| Rab1b   | RAB1B, member RAS oncogene family(Rab1b)                    | Mus musculus |
| Rab21   | RAB21, member RAS oncogene family(Rab21)                    | Mus musculus |
| Rab2a   | RAB2A, member RAS oncogene family(Rab2a)                    | Mus musculus |
| Rab35   | RAB35, member RAS oncogene family(Rab35)                    | Mus musculus |
| Rab3a   | RAB3A, member RAS oncogene family(Rab3a)                    | Mus musculus |
| Rab3c   | RAB3C, member RAS oncogene family(Rab3c)                    | Mus musculus |
| Rab5a   | RAB5A, member RAS oncogene family(Rab5a)                    | Mus musculus |
| Rab5b   | RAB5B, member RAS oncogene family(Rab5b)                    | Mus musculus |
| Rab5c   | RAB5C, member RAS oncogene family(Rab5c)                    | Mus musculus |
| Rab6a   | RAB6A, member RAS oncogene family(Rab6a)                    | Mus musculus |
| Rab6b   | RAB6B, member RAS oncogene family(Rab6b)                    | Mus musculus |
| Rad23b  | RAD23 homolog B, nucleotide excision repair protein(Rad23b) | Mus musculus |
| Ranbp1  | RAN binding protein 1(Ranbp1)                               | Mus musculus |
| Ran     | RAN, member RAS oncogene family(Ran)                        | Mus musculus |
| Rap2b   | RAP2B, member of RAS oncogene family(Rap2b)                 | Mus musculus |
| Rap1b   | RAS related protein 1b(Rap1b)                               | Mus musculus |
| Rap2a   | RAS related protein 2a(Rap2a)                               | Mus musculus |
| Rasl2-9 | RAS-like, family 2, locus 9(Rasl2-9)                        | Mus musculus |
| Rap1gap | Rap1 GTPase-activating protein(Rap1gap)                     | Mus musculus |
| Arhgdia | Rho GDP dissociation inhibitor (GDI) alpha(Arhgdia)         | Mus musculus |
| Arhgap1 | Rho GTPase activating protein 1(Arhgap1)                    | Mus musculus |
| Ahcy    | S-adenosylhomocysteine hydrolase(Ahcy)                      | Mus musculus |
| Ahcy11  | S-adenosylhomocysteine hydrolase-like 1(Ahcy11)             | Mus musculus |
| S100b   | S100 protein, beta polypeptide, neural(S100b)               | Mus musculus |
| Samm50  | SAMM50 sorting and assembly machinery component(Samm50)     | Mus musculus |
| Sec22b  | SEC22 homolog B, vesicle trafficking protein(Sec22b)        | Mus musculus |
| Sh3gl2  | SH3-domain GRB2-like 2(Sh3gl2)                              | Mus musculus |
| Sh3glb2 | SH3-domain GRB2-like endophilin B2(Sh3glb2)                 | Mus musculus |

## SUPPLEMENTARY DATA

|         |                                                                                              |              |
|---------|----------------------------------------------------------------------------------------------|--------------|
| Sparcl1 | SPARC-like 1(Sparcl1)                                                                        | Mus musculus |
| Stt3b   | STT3, subunit of the oligosaccharyltransferase complex, homolog B (S. cerevisiae)(Stt3b)     | Mus musculus |
| Tufm    | Tu translation elongation factor, mitochondrial(Tufm)                                        | Mus musculus |
| Galnt16 | UDP-N-acetyl-alpha-D-galactosamine:polypeptide N-acetylgalactosaminyltransferase 16(Galnt16) | Mus musculus |
| Galnt2  | UDP-N-acetyl-alpha-D-galactosamine:polypeptide N-acetylgalactosaminyltransferase 2(Galnt2)   | Mus musculus |
| Uggt1   | UDP-glucose glycoprotein glucosyltransferase 1(Uggt1)                                        | Mus musculus |
| Vgf     | VGF nerve growth factor inducible(Vgf)                                                       | Mus musculus |
| Vps35   | VPS35 retromer complex component(Vps35)                                                      | Mus musculus |
| Wdr1    | WD repeat domain 1(Wdr1)                                                                     | Mus musculus |
| Yes1    | YES proto-oncogene 1, Src family tyrosine kinase(Yes1)                                       | Mus musculus |
| Adam11  | a disintegrin and metallopeptidase domain 11(Adam11)                                         | Mus musculus |
| Adam22  | a disintegrin and metallopeptidase domain 22(Adam22)                                         | Mus musculus |
| Adam23  | a disintegrin and metallopeptidase domain 23(Adam23)                                         | Mus musculus |
| Abhd16a | abhydrolase domain containing 16A(Abhd16a)                                                   | Mus musculus |
| Abi2    | abl-interactor 2(Abi2)                                                                       | Mus musculus |
| Acat1   | acetyl-Coenzyme A acetyltransferase 1(Acat1)                                                 | Mus musculus |
| Anp32a  | acidic (leucine-rich) nuclear phosphoprotein 32 family, member A(Anp32a)                     | Mus musculus |
| Aco2    | aconitase 2, mitochondrial(Aco2)                                                             | Mus musculus |
| Arpc2   | actin related protein 2/3 complex, subunit 2(Arpc2)                                          | Mus musculus |
| Arpc4   | actin related protein 2/3 complex, subunit 4(Arpc4)                                          | Mus musculus |
| Acta1   | actin, alpha 1, skeletal muscle(Acta1)                                                       | Mus musculus |
| Acta2   | actin, alpha 2, smooth muscle, aorta(Acta2)                                                  | Mus musculus |
| Actg1   | actin, gamma, cytoplasmic 1(Actg1)                                                           | Mus musculus |
| Alcam   | activated leukocyte cell adhesion molecule(Alcam)                                            | Mus musculus |
| Acot7   | acyl-CoA thioesterase 7(Acot7)                                                               | Mus musculus |
| Ap1b1   | adaptor protein complex AP-1, beta 1 subunit(Ap1b1)                                          | Mus musculus |
| Ap2a1   | adaptor-related protein complex 2, alpha 1 subunit(Ap2a1)                                    | Mus musculus |
| Ap2a2   | adaptor-related protein complex 2, alpha 2 subunit(Ap2a2)                                    | Mus musculus |
| Ap2b1   | adaptor-related protein complex 2, beta 1 subunit(Ap2b1)                                     | Mus musculus |
| Ap2m1   | adaptor-related protein complex 2, mu 1 subunit(Ap2m1)                                       | Mus musculus |
| Ap3b2   | adaptor-related protein complex 3, beta 2 subunit(Ap3b2)                                     | Mus musculus |
| Ap3d1   | adaptor-related protein complex 3, delta 1 subunit(Ap3d1)                                    | Mus musculus |
| Adcy5   | adenylate cyclase 5(Adcy5)                                                                   | Mus musculus |
| Adcy9   | adenylate cyclase 9(Adcy9)                                                                   | Mus musculus |
| Adss    | adenylosuccinate synthetase, non muscle(Adss)                                                | Mus musculus |
| Apmap   | adipocyte plasma membrane associated protein(Apmap)                                          | Mus musculus |
| Aars    | alanyl-tRNA synthetase(Aars)                                                                 | Mus musculus |
| Alb     | albumin(Alb)                                                                                 | Mus musculus |
| Adh5    | alcohol dehydrogenase 5 (class III), chi polypeptide(Adh5)                                   | Mus musculus |

## SUPPLEMENTARY DATA

|          |                                                                       |              |
|----------|-----------------------------------------------------------------------|--------------|
| Aldh2    | aldehyde dehydrogenase 2, mitochondrial(Aldh2)                        | Mus musculus |
| Aldh1a7  | aldehyde dehydrogenase family 1, subfamily A7(Aldh1a7)                | Mus musculus |
| Aldh5a1  | aldehyde dehydrogenase family 5, subfamily A1(Aldh5a1)                | Mus musculus |
| Akr1a1   | aldo-keto reductase family 1, member A1 (aldehyde reductase)(Akr1a1)  | Mus musculus |
| Aldoa    | aldolase A, fructose-bisphosphate(Aldoa)                              | Mus musculus |
| Aldoc    | aldolase C, fructose-bisphosphate(Aldoc)                              | Mus musculus |
| Alpl     | alkaline phosphatase, liver/bone/kidney(Alpl)                         | Mus musculus |
| Ganab    | alpha glucosidase 2 alpha neutral subunit(Ganab)                      | Mus musculus |
| Npepps   | aminopeptidase puromycin sensitive(Npepps)                            | Mus musculus |
| Amph     | amphiphysin(Amph)                                                     | Mus musculus |
| App      | amyloid beta (A4) precursor protein(App)                              | Mus musculus |
| Aplp1    | amyloid beta (A4) precursor-like protein 1(Aplp1)                     | Mus musculus |
| Aplp2    | amyloid beta (A4) precursor-like protein 2(Aplp2)                     | Mus musculus |
| Ank2     | ankyrin 2, brain(Ank2)                                                | Mus musculus |
| Anxa3    | annexin A3(Anxa3)                                                     | Mus musculus |
| Anxa5    | annexin A5(Anxa5)                                                     | Mus musculus |
| Anxa6    | annexin A6(Anxa6)                                                     | Mus musculus |
| Apod     | apolipoprotein D(Apod)                                                | Mus musculus |
| ApoE     | apolipoprotein E(ApoE)                                                | Mus musculus |
| Aqp4     | aquaporin 4(Aqp4)                                                     | Mus musculus |
| Astn1    | astrotactin 1(Astn1)                                                  | Mus musculus |
| Atg9a    | autophagy related 9A(Atg9a)                                           | Mus musculus |
| Bsg      | basigin(Bsg)                                                          | Mus musculus |
| Bace1    | beta-site APP cleaving enzyme 1(Bace1)                                | Mus musculus |
| Pygb     | brain glycogen phosphorylase(Pygb)                                    | Mus musculus |
| Bcan     | brevican(Bcan)                                                        | Mus musculus |
| Bin1     | bridging integrator 1(Bin1)                                           | Mus musculus |
| Cdh13    | cadherin 13(Cdh13)                                                    | Mus musculus |
| Calb1    | calbindin 1(Calb1)                                                    | Mus musculus |
| Cacna1e  | calcium channel, voltage-dependent, R type, alpha 1E subunit(Cacna1e) | Mus musculus |
| Cacna2d2 | calcium channel, voltage-dependent, alpha 2/delta subunit 2(Cacna2d2) | Mus musculus |
| Cacna2d1 | calcium channel, voltage-dependent, alpha 2/delta subunit 1(Cacna2d1) | Mus musculus |
| Cacna2d3 | calcium channel, voltage-dependent, alpha 2/delta subunit 3(Cacna2d3) | Mus musculus |
| Cacng3   | calcium channel, voltage-dependent, gamma subunit 3(Cacng3)           | Mus musculus |
| Camk2a   | calcium/calmodulin-dependent protein kinase II alpha(Camk2a)          | Mus musculus |
| Camk2g   | calcium/calmodulin-dependent protein kinase II gamma(Camk2g)          | Mus musculus |
| Camk2b   | calcium/calmodulin-dependent protein kinase II, beta(Camk2b)          | Mus musculus |
| Camk2d   | calcium/calmodulin-dependent protein kinase II, delta(Camk2d)         | Mus musculus |
| Canx     | calnexin(Canx)                                                        | Mus musculus |
| Capn2    | calpain 2(Capn2)                                                      | Mus musculus |

## SUPPLEMENTARY DATA

|         |                                                                 |              |
|---------|-----------------------------------------------------------------|--------------|
| Calr    | calreticulin(Calr)                                              | Mus musculus |
| Clstn1  | calsyntenin 1(Clstn1)                                           | Mus musculus |
| Casc4   | cancer susceptibility candidate 4(Casc4)                        | Mus musculus |
| Cnr1    | cannabinoid receptor 1 (brain)(Cnr1)                            | Mus musculus |
| Cnrip1  | cannabinoid receptor interacting protein 1(Cnrip1)              | Mus musculus |
| Capza2  | capping protein (actin filament) muscle Z-line, alpha 2(Capza2) | Mus musculus |
| Capzb   | capping protein (actin filament) muscle Z-line, beta(Capzb)     | Mus musculus |
| Cbr1    | carbonyl reductase 1(Cbr1)                                      | Mus musculus |
| Cpe     | carboxypeptidase E(Cpe)                                         | Mus musculus |
| Crtac1  | cartilage acidic protein 1(Crtac1)                              | Mus musculus |
| Csnk2a1 | casein kinase 2, alpha 1 polypeptide(Csnk2a1)                   | Mus musculus |
| Ctnna2  | catenin (cadherin associated protein), alpha 2(Ctnna2)          | Mus musculus |
| Ctnnb1  | catenin (cadherin associated protein), beta 1(Ctnnb1)           | Mus musculus |
| Ctsd    | cathepsin D(Ctsd)                                               | Mus musculus |
| Cadm1   | cell adhesion molecule 1(Cadm1)                                 | Mus musculus |
| Cdc37   | cell division cycle 37(Cdc37)                                   | Mus musculus |
| Cdc42   | cell division cycle 42(Cdc42)                                   | Mus musculus |
| Cct2    | chaperonin containing Tcp1, subunit 2 (beta)(Cct2)              | Mus musculus |
| Cct3    | chaperonin containing Tcp1, subunit 3 (gamma)(Cct3)             | Mus musculus |
| Cct4    | chaperonin containing Tcp1, subunit 4 (delta)(Cct4)             | Mus musculus |
| Cct5    | chaperonin containing Tcp1, subunit 5 (epsilon)(Cct5)           | Mus musculus |
| Cct6a   | chaperonin containing Tcp1, subunit 6a (zeta)(Cct6a)            | Mus musculus |
| Cct7    | chaperonin containing Tcp1, subunit 7 (eta)(Cct7)               | Mus musculus |
| Cct8    | chaperonin containing Tcp1, subunit 8 (theta)(Cct8)             | Mus musculus |
| Chmp6   | charged multivesicular body protein 6(Chmp6)                    | Mus musculus |
| Chid1   | chitinase domain containing 1(Chid1)                            | Mus musculus |
| Clcn3   | chloride channel, voltage-sensitive 3(Clcn3)                    | Mus musculus |
| Cspg5   | chondroitin sulfate proteoglycan 5(Cspg5)                       | Mus musculus |
| Cntfr   | ciliary neurotrophic factor receptor(Cntfr)                     | Mus musculus |
| Cs      | citrate synthase(Cs)                                            | Mus musculus |
| Cltc    | clathrin, heavy polypeptide (Hc)(Cltc)                          | Mus musculus |
| Cldnd1  | claudin domain containing 1(Cldnd1)                             | Mus musculus |
| Cfl1    | cofilin 1, non-muscle(Cfl1)                                     | Mus musculus |
| Cfl2    | cofilin 2, muscle(Cfl2)                                         | Mus musculus |
| Crmp1   | collapsin response mediator protein 1(Crmp1)                    | Mus musculus |
| C1qbp   | complement component 1, q subcomponent binding protein(C1qbp)   | Mus musculus |
| Cplx2   | complexin 2(Cplx2)                                              | Mus musculus |
| Cntn1   | contactin 1(Cntn1)                                              | Mus musculus |
| Cntn2   | contactin 2(Cntn2)                                              | Mus musculus |
| Cntnap2 | contactin associated protein-like 2(Cntnap2)                    | Mus musculus |

## SUPPLEMENTARY DATA

|        |                                                                    |              |
|--------|--------------------------------------------------------------------|--------------|
| Cpne4  | copine IV(Cpne4)                                                   | Mus musculus |
| Cpne6  | copine VI(Cpne6)                                                   | Mus musculus |
| Cpne9  | copine family member IX(Cpne9)                                     | Mus musculus |
| Coro1b | coronin, actin binding protein 1B(Coro1b)                          | Mus musculus |
| Coro1c | coronin, actin binding protein 1C(Coro1c)                          | Mus musculus |
| Ckb    | creatine kinase, brain(Ckb)                                        | Mus musculus |
| Ckmt1  | creatine kinase, mitochondrial 1, ubiquitous(Ckmt1)                | Mus musculus |
| Crym   | crystallin, mu(Crym)                                               | Mus musculus |
| Ccny   | cyclin Y(Ccny)                                                     | Mus musculus |
| Cst3   | cystatin C(Cst3)                                                   | Mus musculus |
| Csrp1  | cysteine and glycine-rich protein 1(Csrp1)                         | Mus musculus |
| Cmpk1  | cytidine monophosphate (UMP-CMP) kinase 1(Cmpk1)                   | Mus musculus |
| Cox4i1 | cytochrome c oxidase subunit IV isoform 1(Cox4i1)                  | Mus musculus |
| Cox7a2 | cytochrome c oxidase subunit VIIa 2(Cox7a2)                        | Mus musculus |
| Cox7c  | cytochrome c oxidase subunit VIIc(Cox7c)                           | Mus musculus |
| Cox6c  | cytochrome c oxidase subunit VIc(Cox6c)                            | Mus musculus |
| Cox5a  | cytochrome c oxidase subunit Va(Cox5a)                             | Mus musculus |
| Cox5b  | cytochrome c oxidase subunit Vb(Cox5b)                             | Mus musculus |
| Cox6b1 | cytochrome c oxidase, subunit VIb polypeptide 1(Cox6b1)            | Mus musculus |
| Cycs   | cytochrome c, somatic(Cycs)                                        | Mus musculus |
| Cyc1   | cytochrome c-1(Cyc1)                                               | Mus musculus |
| Cyfp2  | cytoplasmic FMR1 interacting protein 2(Cyfp2)                      | Mus musculus |
| Ddb1   | damage specific DNA binding protein 1(Ddb1)                        | Mus musculus |
| Dad1   | defender against cell death 1(Dad1)                                | Mus musculus |
| Dstn   | destrin(Dstn)                                                      | Mus musculus |
| Dbi    | diazepam binding inhibitor(Dbi)                                    | Mus musculus |
| Dld    | dihydrolipoamide dehydrogenase(Dld)                                | Mus musculus |
| Dpysl2 | dihydropyrimidinase-like 2(Dpysl2)                                 | Mus musculus |
| Dpysl3 | dihydropyrimidinase-like 3(Dpysl3)                                 | Mus musculus |
| Dpysl4 | dihydropyrimidinase-like 4(Dpysl4)                                 | Mus musculus |
| Dpysl5 | dihydropyrimidinase-like 5(Dpysl5)                                 | Mus musculus |
| Ddah1  | dimethylarginine dimethylaminohydrolase 1(Ddah1)                   | Mus musculus |
| Dpp10  | dipeptidylpeptidase 10(Dpp10)                                      | Mus musculus |
| Dpp6   | dipeptidylpeptidase 6(Dpp6)                                        | Mus musculus |
| Dlg1   | discs, large homolog 1 (Drosophila)(Dlg1)                          | Mus musculus |
| Dlg2   | discs, large homolog 2 (Drosophila)(Dlg2)                          | Mus musculus |
| Dlg4   | discs, large homolog 4 (Drosophila)(Dlg4)                          | Mus musculus |
| Dpm1   | dolichol-phosphate (beta-D) mannosyltransferase 1(Dpm1)            | Mus musculus |
| Ddost  | dolichyl-di-phosphooligosaccharide-protein glycotransferase(Ddost) | Mus musculus |
| Dclk1  | doublecortin-like kinase 1(Dclk1)                                  | Mus musculus |

## SUPPLEMENTARY DATA

|         |                                                                        |              |
|---------|------------------------------------------------------------------------|--------------|
| Dpy1911 | dpy-19-like 1 (C. elegans)(Dpy1911)                                    | Mus musculus |
| Dctn1   | dynactin 1(Dctn1)                                                      | Mus musculus |
| Dctn2   | dynactin 2(Dctn2)                                                      | Mus musculus |
| Dnm1    | dynamamin 1(Dnm1)                                                      | Mus musculus |
| Dnm11   | dynamamin 1-like(Dnm11)                                                | Mus musculus |
| Dnm3    | dynamamin 3(Dnm3)                                                      | Mus musculus |
| Dync1h1 | dynein cytoplasmic 1 heavy chain 1(Dync1h1)                            | Mus musculus |
| Dynll2  | dynein light chain LC8-type 2(Dynll2)                                  | Mus musculus |
| Enpp5   | ectonucleotide pyrophosphatase/phosphodiesterase 5(Enpp5)              | Mus musculus |
| Etfa    | electron transferring flavoprotein, alpha polypeptide(Etfa)            | Mus musculus |
| Etfdh   | electron transferring flavoprotein, dehydrogenase(Etfdh)               | Mus musculus |
| Endod1  | endonuclease domain containing 1(Endod1)                               | Mus musculus |
| Erp29   | endoplasmic reticulum protein 29(Erp29)                                | Mus musculus |
| Ergic1  | endoplasmic reticulum-golgi intermediate compartment (ERGIC) 1(Ergic1) | Mus musculus |
| Eno1    | enolase 1, alpha non-neuron(Eno1)                                      | Mus musculus |
| Eno2    | enolase 2, gamma neuronal(Eno2)                                        | Mus musculus |
| Echs1   | enoyl Coenzyme A hydratase, short chain, 1, mitochondrial(Echs1)       | Mus musculus |
| Ephx1   | epoxide hydrolase 1, microsomal(Ephx1)                                 | Mus musculus |
| Epb4111 | erythrocyte membrane protein band 4.1 like 1(Epb4111)                  | Mus musculus |
| Epb4112 | erythrocyte membrane protein band 4.1 like 2(Epb4112)                  | Mus musculus |
| Epb4113 | erythrocyte membrane protein band 4.1 like 3(Epb4113)                  | Mus musculus |
| Esd     | esterase D/formylglutathione hydrolase(Esd)                            | Mus musculus |
| Eef1a1  | eukaryotic translation elongation factor 1 alpha 1(Eef1a1)             | Mus musculus |
| Eef1a2  | eukaryotic translation elongation factor 1 alpha 2(Eef1a2)             | Mus musculus |
| Eef1g   | eukaryotic translation elongation factor 1 gamma(Eef1g)                | Mus musculus |
| Eef2    | eukaryotic translation elongation factor 2(Eef2)                       | Mus musculus |
| Eif4a2  | eukaryotic translation initiation factor 4A2(Eif4a2)                   | Mus musculus |
| Eif5a   | eukaryotic translation initiation factor 5A(Eif5a)                     | Mus musculus |
| Fam213a | family with sequence similarity 213, member A(Fam213a)                 | Mus musculus |
| Fam3c   | family with sequence similarity 3, member C(Fam3c)                     | Mus musculus |
| Fscn1   | fascin actin-bundling protein 1(Fscn1)                                 | Mus musculus |
| Fasn    | fatty acid synthase(Fasn)                                              | Mus musculus |
| Frrs11  | ferric-chelate reductase 1 like(Frrs11)                                | Mus musculus |
| Ftl1    | ferritin light polypeptide 1(Ftl1)                                     | Mus musculus |
| Flot2   | flotillin 2(Flot2)                                                     | Mus musculus |
| Folh1   | folate hydrolase 1(Folh1)                                              | Mus musculus |
| Gabra1  | gamma-aminobutyric acid (GABA) A receptor, subunit alpha 1(Gabra1)     | Mus musculus |
| Gabra2  | gamma-aminobutyric acid (GABA) A receptor, subunit alpha 2(Gabra2)     | Mus musculus |
| Gabra3  | gamma-aminobutyric acid (GABA) A receptor, subunit alpha 3(Gabra3)     | Mus musculus |
| Gabra4  | gamma-aminobutyric acid (GABA) A receptor, subunit alpha 4(Gabra4)     | Mus musculus |



## SUPPLEMENTARY DATA

|        |                                                                    |              |
|--------|--------------------------------------------------------------------|--------------|
| Gabrb1 | gamma-aminobutyric acid (GABA) A receptor, subunit beta 1(Gabrb1)  | Mus musculus |
| Gabrb2 | gamma-aminobutyric acid (GABA) A receptor, subunit beta 2(Gabrb2)  | Mus musculus |
| Gabrb3 | gamma-aminobutyric acid (GABA) A receptor, subunit beta 3(Gabrb3)  | Mus musculus |
| Gabrg2 | gamma-aminobutyric acid (GABA) A receptor, subunit gamma 2(Gabrg2) | Mus musculus |
| Gabbr1 | gamma-aminobutyric acid (GABA) B receptor, 1(Gabbr1)               | Mus musculus |
| Ggt7   | gamma-glutamyltransferase 7(Ggt7)                                  | Mus musculus |
| Gja1   | gap junction protein, alpha 1(Gja1)                                | Mus musculus |
| Gphn   | gephyrin(Gphn)                                                     | Mus musculus |
| Gmfb   | glia maturation factor, beta(Gmfb)                                 | Mus musculus |
| Gad1   | glutamate decarboxylase 1(Gad1)                                    | Mus musculus |
| Glud1  | glutamate dehydrogenase 1(Glud1)                                   | Mus musculus |
| Gria1  | glutamate receptor, ionotropic, AMPA1 (alpha 1)(Gria1)             | Mus musculus |
| Gria2  | glutamate receptor, ionotropic, AMPA2 (alpha 2)(Gria2)             | Mus musculus |
| Gria3  | glutamate receptor, ionotropic, AMPA3 (alpha 3)(Gria3)             | Mus musculus |
| Gria4  | glutamate receptor, ionotropic, AMPA4 (alpha 4)(Gria4)             | Mus musculus |
| Grin2a | glutamate receptor, ionotropic, NMDA2A (epsilon 1)(Grin2a)         | Mus musculus |
| Grin2b | glutamate receptor, ionotropic, NMDA2B (epsilon 2)(Grin2b)         | Mus musculus |
| Grik2  | glutamate receptor, ionotropic, kainate 2 (beta 2)(Grik2)          | Mus musculus |
| Grm1   | glutamate receptor, metabotropic 1(Grm1)                           | Mus musculus |
| Grm3   | glutamate receptor, metabotropic 3(Grm3)                           | Mus musculus |
| Grm5   | glutamate receptor, metabotropic 5(Grm5)                           | Mus musculus |
| Grm7   | glutamate receptor, metabotropic 7(Grm7)                           | Mus musculus |
| Glul   | glutamate-ammonia ligase (glutamine synthetase)(Glul)              | Mus musculus |
| Got2   | glutamatic-oxaloacetic transaminase 2, mitochondrial(Got2)         | Mus musculus |
| Gad2   | glutamic acid decarboxylase 2(Gad2)                                | Mus musculus |
| Got1   | glutamic-oxaloacetic transaminase 1, soluble(Got1)                 | Mus musculus |
| Gstm1  | glutathione S-transferase, mu 1(Gstm1)                             | Mus musculus |
| Gstm5  | glutathione S-transferase, mu 5(Gstm5)                             | Mus musculus |
| Gstp1  | glutathione S-transferase, pi 1(Gstp1)                             | Mus musculus |
| Gstp2  | glutathione S-transferase, pi 2(Gstp2)                             | Mus musculus |
| Gapdh  | glyceraldehyde-3-phosphate dehydrogenase(Gapdh)                    | Mus musculus |
| Gpd2   | glycerol phosphate dehydrogenase 2, mitochondrial(Gpd2)            | Mus musculus |
| Gpd1   | glycerol-3-phosphate dehydrogenase 1 (soluble)(Gpd1)               | Mus musculus |
| Gpd11  | glycerol-3-phosphate dehydrogenase 1-like(Gpd11)                   | Mus musculus |
| Gpm6a  | glycoprotein m6a(Gpm6a)                                            | Mus musculus |
| Gpm6b  | glycoprotein m6b(Gpm6b)                                            | Mus musculus |
| Glo1   | glyoxalase 1(Glo1)                                                 | Mus musculus |
| Glod4  | glyoxalase domain containing 4(Glod4)                              | Mus musculus |
| Gpc1   | glypican 1(Gpc1)                                                   | Mus musculus |
| Golga7 | golgi autoantigen, golgin subfamily a, 7(Golga7)                   | Mus musculus |

## SUPPLEMENTARY DATA

|           |                                                                             |              |
|-----------|-----------------------------------------------------------------------------|--------------|
| GOLGA7B   | golgi autoantigen, golgin subfamily a, 7B(Golga7b)                          | Mus musculus |
| Gap43     | growth associated protein 43(Gap43)                                         | Mus musculus |
| Grb2      | growth factor receptor bound protein 2(Grb2)                                | Mus musculus |
| Gda       | guanine deaminase(Gda)                                                      | Mus musculus |
| Gnai2     | guanine nucleotide binding protein (G protein), alpha inhibiting 2(Gnai2)   | Mus musculus |
| Gnai3     | guanine nucleotide binding protein (G protein), alpha inhibiting 3(Gnai3)   | Mus musculus |
| Gnb1      | guanine nucleotide binding protein (G protein), beta 1(Gnb1)                | Mus musculus |
| Gnb2      | guanine nucleotide binding protein (G protein), beta 2(Gnb2)                | Mus musculus |
| Gnb4      | guanine nucleotide binding protein (G protein), beta 4(Gnb4)                | Mus musculus |
| Gnb5      | guanine nucleotide binding protein (G protein), beta 5(Gnb5)                | Mus musculus |
| Gng3      | guanine nucleotide binding protein (G protein), gamma 3(Gng3)               | Mus musculus |
| Gna11     | guanine nucleotide binding protein, alpha 11(Gna11)                         | Mus musculus |
| Gna13     | guanine nucleotide binding protein, alpha 13(Gna13)                         | Mus musculus |
| Gnao1     | guanine nucleotide binding protein, alpha O(Gnao1)                          | Mus musculus |
| Gnaq      | guanine nucleotide binding protein, alpha q polypeptide(Gnaq)               | Mus musculus |
| Gnal      | guanine nucleotide binding protein, alpha stimulating, olfactory type(Gnal) | Mus musculus |
| Gdi1      | guanosine diphosphate (GDP) dissociation inhibitor 1(Gdi1)                  | Mus musculus |
| Gdi2      | guanosine diphosphate (GDP) dissociation inhibitor 2(Gdi2)                  | Mus musculus |
| Gucy1b3   | guanylate cyclase 1, soluble, beta 3(Gucy1b3)                               | Mus musculus |
| Hsph1     | heat shock 105kDa/110kDa protein 1(Hsph1)                                   | Mus musculus |
| Hspe1     | heat shock protein 1 (chaperonin 10)(Hspe1)                                 | Mus musculus |
| Hspd1     | heat shock protein 1 (chaperonin)(Hspd1)                                    | Mus musculus |
| Hspa11    | heat shock protein 1-like(Hspa11)                                           | Mus musculus |
| Hspa12a   | heat shock protein 12A(Hspa12a)                                             | Mus musculus |
| Hspa4l    | heat shock protein 4 like(Hspa4l)                                           | Mus musculus |
| Hspa4     | heat shock protein 4(Hspa4)                                                 | Mus musculus |
| Hspa5     | heat shock protein 5(Hspa5)                                                 | Mus musculus |
| Hspa8     | heat shock protein 8(Hspa8)                                                 | Mus musculus |
| Hspa9     | heat shock protein 9(Hspa9)                                                 | Mus musculus |
| Hsp90ab1  | heat shock protein 90 alpha (cytosolic), class B member 1(Hsp90ab1)         | Mus musculus |
| Hsp90aa1  | heat shock protein 90, alpha (cytosolic), class A member 1(Hsp90aa1)        | Mus musculus |
| Hsp90b1   | heat shock protein 90, beta (Grp94), member 1(Hsp90b1)                      | Mus musculus |
| Hbb-b1    | hemoglobin, beta adult major chain(Hbb-b1)                                  | Mus musculus |
| Hepacam   | hepatocyte cell adhesion molecule(Hepacam)                                  | Mus musculus |
| Hnrnpa1   | heterogeneous nuclear ribonucleoprotein A1(Hnrnpa1)                         | Mus musculus |
| Hnrnpa2b1 | heterogeneous nuclear ribonucleoprotein A2/B1(Hnrnpa2b1)                    | Mus musculus |
| Hnrnpd    | heterogeneous nuclear ribonucleoprotein D(Hnrnpd)                           | Mus musculus |
| Hnrnpk    | heterogeneous nuclear ribonucleoprotein K(Hnrnpk)                           | Mus musculus |
| Hk1       | hexokinase 1(Hk1)                                                           | Mus musculus |
| Hmgb1     | high mobility group box 1(Hmgb1)                                            | Mus musculus |

## SUPPLEMENTARY DATA

|          |                                                                 |              |
|----------|-----------------------------------------------------------------|--------------|
| Hpca     | hippocalcin(Hpca)                                               | Mus musculus |
| Hpcal1   | hippocalcin-like 1(Hpcal1)                                      | Mus musculus |
| Hpcal4   | hippocalcin-like 4(Hpcal4)                                      | Mus musculus |
| Hint1    | histidine triad nucleotide binding protein 1(Hint1)             | Mus musculus |
| Hist1h4a | histone cluster 1, H4a(Hist1h4a)                                | Mus musculus |
| Hapln4   | hyaluronan and proteoglycan link protein 4(Hapln4)              | Mus musculus |
| Hsd17b4  | hydroxysteroid (17-beta) dehydrogenase 4(Hsd17b4)               | Mus musculus |
| Hcn2     | hyperpolarization-activated, cyclic nucleotide-gated K+ 2(Hcn2) | Mus musculus |
| Hyou1    | hypoxia up-regulated 1(Hyou1)                                   | Mus musculus |
| Ilvbl    | ilvB (bacterial acetolactate synthase)-like(Ilvbl)              | Mus musculus |
| Igsf21   | immunoglobulin superfamily, member 21(Igsf21)                   | Mus musculus |
| Immt     | inner membrane protein, mitochondrial(Immt)                     | Mus musculus |
| Impa1    | inositol (myo)-1(or 4)-monophosphatase 1(Impa1)                 | Mus musculus |
| Itpr1    | inositol 1,4,5-trisphosphate receptor 1(Itpr1)                  | Mus musculus |
| Impad1   | inositol monophosphatase domain containing 1(Impad1)            | Mus musculus |
| Inpp5a   | inositol polyphosphate-5-phosphatase A(Inpp5a)                  | Mus musculus |
| Itgb1    | integrin beta 1 (fibronectin receptor beta)(Itgb1)              | Mus musculus |
| Itgb8    | integrin beta 8(Itgb8)                                          | Mus musculus |
| Icam5    | intercellular adhesion molecule 5, telencephalin(Icam5)         | Mus musculus |
| Idh1     | isocitrate dehydrogenase 1 (NADP+), soluble(Idh1)               | Mus musculus |
| Idh2     | isocitrate dehydrogenase 2 (NADP+), mitochondrial(Idh2)         | Mus musculus |
| Idh3a    | isocitrate dehydrogenase 3 (NAD+) alpha(Idh3a)                  | Mus musculus |
| Idh3g    | isocitrate dehydrogenase 3 (NAD+), gamma(Idh3g)                 | Mus musculus |
| Jam3     | junction adhesion molecule 3(Jam3)                              | Mus musculus |
| Kpnb1    | karyopherin (importin) beta 1(Kpnb1)                            | Mus musculus |
| Kif5a    | kinesin family member 5A(Kif5a)                                 | Mus musculus |
| Kif5c    | kinesin family member 5C(Kif5c)                                 | Mus musculus |
| Lactb    | lactamase, beta(Lactb)                                          | Mus musculus |
| Ldha     | lactate dehydrogenase A(Ldha)                                   | Mus musculus |
| Ldhb     | lactate dehydrogenase B(Ldhb)                                   | Mus musculus |
| Lxn      | latexin(Lxn)                                                    | Mus musculus |
| Lman2    | lectin, mannose-binding 2(Lman2)                                | Mus musculus |
| Lap3     | leucine aminopeptidase 3(Lap3)                                  | Mus musculus |
| Lingo1   | leucine rich repeat and Ig domain containing 1(Lingo1)          | Mus musculus |
| Lrrc57   | leucine rich repeat containing 57(Lrrc57)                       | Mus musculus |
| Lrrc8a   | leucine rich repeat containing 8A(Lrrc8a)                       | Mus musculus |
| Lgi1     | leucine-rich repeat LGI family, member 1(Lgi1)                  | Mus musculus |
| Lgi2     | leucine-rich repeat LGI family, member 2(Lgi2)                  | Mus musculus |
| Lgi3     | leucine-rich repeat LGI family, member 3(Lgi3)                  | Mus musculus |
| Lsamp    | limbic system-associated membrane protein(Lsamp)                | Mus musculus |

## SUPPLEMENTARY DATA

|          |                                                                               |              |
|----------|-------------------------------------------------------------------------------|--------------|
| Lin7a    | lin-7 homolog A (C. elegans)(Lin7a)                                           | Mus musculus |
| Lin7c    | lin-7 homolog C (C. elegans)(Lin7c)                                           | Mus musculus |
| Lrpap1   | low density lipoprotein receptor-related protein associated protein 1(Lrpap1) | Mus musculus |
| Ly6h     | lymphocyte antigen 6 complex, locus H(Ly6h)                                   | Mus musculus |
| Lclat1   | lysocardiolipin acyltransferase 1(Lclat1)                                     | Mus musculus |
| Lamp1    | lysosomal-associated membrane protein 1(Lamp1)                                | Mus musculus |
| Lamp2    | lysosomal-associated membrane protein 2(Lamp2)                                | Mus musculus |
| Mdh1     | malate dehydrogenase 1, NAD (soluble)(Mdh1)                                   | Mus musculus |
| Mdh2     | malate dehydrogenase 2, NAD (mitochondrial)(Mdh2)                             | Mus musculus |
| Mpp2     | membrane protein, palmitoylated 2 (MAGUK p55 subfamily member 2)(Mpp2)        | Mus musculus |
| Mpp6     | membrane protein, palmitoylated 6 (MAGUK p55 subfamily member 6)(Mpp6)        | Mus musculus |
| Mat2a    | methionine adenosyltransferase II, alpha(Mat2a)                               | Mus musculus |
| Mgst3    | microsomal glutathione S-transferase 3(Mgst3)                                 | Mus musculus |
| Map1a    | microtubule-associated protein 1 A(Map1a)                                     | Mus musculus |
| Map1lc3b | microtubule-associated protein 1 light chain 3 beta(Map1lc3b)                 | Mus musculus |
| Map1b    | microtubule-associated protein 1B(Map1b)                                      | Mus musculus |
| Map2     | microtubule-associated protein 2(Map2)                                        | Mus musculus |
| Mapt     | microtubule-associated protein tau(Mapt)                                      | Mus musculus |
| Mapre3   | microtubule-associated protein, RP/EB family, member 3(Mapre3)                | Mus musculus |
| Mtch2    | mitochondrial carrier 2(Mtch2)                                                | Mus musculus |
| Mpc1     | mitochondrial pyruvate carrier 1(Mpc1)                                        | Mus musculus |
| Mapk1    | mitogen-activated protein kinase 1(Mapk1)                                     | Mus musculus |
| Map2k1   | mitogen-activated protein kinase kinase 1(Map2k1)                             | Mus musculus |
| Maoa     | monoamine oxidase A(Maoa)                                                     | Mus musculus |
| Pygm     | muscle glycogen phosphorylase(Pygm)                                           | Mus musculus |
| Mal      | myelin and lymphocyte protein, T cell differentiation protein(Mal)            | Mus musculus |
| Mbp      | myelin basic protein(Mbp)                                                     | Mus musculus |
| Mog      | myelin oligodendrocyte glycoprotein(Mog)                                      | Mus musculus |
| Mag      | myelin-associated glycoprotein(Mag)                                           | Mus musculus |
| Myadm    | myeloid-associated differentiation marker(Myadm)                              | Mus musculus |
| Isyna1   | myo-inositol 1-phosphate synthase A1(Isyna1)                                  | Mus musculus |
| Myo1d    | myosin ID(Myo1d)                                                              | Mus musculus |
| Myh10    | myosin, heavy polypeptide 10, non-muscle(Myh10)                               | Mus musculus |
| My112b   | myosin, light chain 12B, regulatory(My112b)                                   | Mus musculus |
| Mtpn     | myotrophin(Mtpn)                                                              | Mus musculus |
| Marcks   | myristoylated alanine rich protein kinase C substrate(Marcks)                 | Mus musculus |
| Neo1     | neogenin(Neo1)                                                                | Mus musculus |
| Ncam1    | neural cell adhesion molecule 1(Ncam1)                                        | Mus musculus |
| Nrxn1    | neurexin I(Nrxn1)                                                             | Mus musculus |
| Nrxn2    | neurexin II(Nrxn2)                                                            | Mus musculus |

## SUPPLEMENTARY DATA

|          |                                                                    |              |
|----------|--------------------------------------------------------------------|--------------|
| Nrxn3    | neurexin III(Nrxn3)                                                | Mus musculus |
| Ncan     | neurocan(Ncan)                                                     | Mus musculus |
| Ncdn     | neurochondrin(Ncdn)                                                | Mus musculus |
| Nfasc    | neurofascin(Nfasc)                                                 | Mus musculus |
| Nlgn2    | neuroligin 2(Nlgn2)                                                | Mus musculus |
| Nlgn3    | neuroligin 3(Nlgn3)                                                | Mus musculus |
| Ncs1     | neuronal calcium sensor 1(Ncs1)                                    | Mus musculus |
| Nrcam    | neuronal cell adhesion molecule(Nrcam)                             | Mus musculus |
| Negr1    | neuronal growth regulator 1(Negr1)                                 | Mus musculus |
| Ngef     | neuronal guanine nucleotide exchange factor(Ngef)                  | Mus musculus |
| Nptx1    | neuronal pentraxin 1(Nptx1)                                        | Mus musculus |
| Nptxr    | neuronal pentraxin receptor(Nptxr)                                 | Mus musculus |
| Nptn     | neuroplastin(Nptn)                                                 | Mus musculus |
| Ntm      | neurotrimin(Ntm)                                                   | Mus musculus |
| Ntrk2    | neurotrophic tyrosine kinase, receptor, type 2(Ntrk2)              | Mus musculus |
| Ncstn    | nicastrin(Ncstn)                                                   | Mus musculus |
| Nipsnap1 | nipsnap homolog 1 (C. elegans)(Nipsnap1)                           | Mus musculus |
| Nomo1    | nodal modulator 1(Nomo1)                                           | Mus musculus |
| Nutf2    | nuclear transport factor 2(Nutf2)                                  | Mus musculus |
| Nucb1    | nucleobindin 1(Nucb1)                                              | Mus musculus |
| Nap111   | nucleosome assembly protein 1-like 1(Nap111)                       | Mus musculus |
| Nap114   | nucleosome assembly protein 1-like 4(Nap114)                       | Mus musculus |
| Olfm1    | olfactomedin 1(Olfm1)                                              | Mus musculus |
| Opa1     | optic atrophy 1(Opa1)                                              | Mus musculus |
| Ogdh     | oxoglutarate (alpha-ketoglutarate) dehydrogenase (lipoamide)(Ogdh) | Mus musculus |
| Pak1     | p21 protein (Cdc42/Rac)-activated kinase 1(Pak1)                   | Mus musculus |
| Ppt1     | palmitoyl-protein thioesterase 1(Ppt1)                             | Mus musculus |
| Palm     | paralemmin(Palm)                                                   | Mus musculus |
| Pepd     | peptidase D(Pepd)                                                  | Mus musculus |
| Ppia     | peptidylprolyl isomerase A(Ppia)                                   | Mus musculus |
| Ppid     | peptidylprolyl isomerase D (cyclophilin D)(Ppid)                   | Mus musculus |
| Prdx1    | peroxiredoxin 1(Prdx1)                                             | Mus musculus |
| Prdx2    | peroxiredoxin 2(Prdx2)                                             | Mus musculus |
| Prdx3    | peroxiredoxin 3(Prdx3)                                             | Mus musculus |
| Prdx4    | peroxiredoxin 4(Prdx4)                                             | Mus musculus |
| Prdx5    | peroxiredoxin 5(Prdx5)                                             | Mus musculus |
| Prdx6    | peroxiredoxin 6(Prdx6)                                             | Mus musculus |
| Pebp1    | phosphatidylethanolamine binding protein 1(Pebp1)                  | Mus musculus |
| Pgs1     | phosphatidylglycerophosphate synthase 1(Pgs1)                      | Mus musculus |
| Pi4ka    | phosphatidylinositol 4-kinase, catalytic, alpha polypeptide(Pi4ka) | Mus musculus |

## SUPPLEMENTARY DATA

|          |                                                                                                                             |              |
|----------|-----------------------------------------------------------------------------------------------------------------------------|--------------|
| Pigk     | phosphatidylinositol glycan anchor biosynthesis, class K(Pigk)                                                              | Mus musculus |
| Pigs     | phosphatidylinositol glycan anchor biosynthesis, class S(Pigs)                                                              | Mus musculus |
| Pigt     | phosphatidylinositol glycan anchor biosynthesis, class T(Pigt)                                                              | Mus musculus |
| Pigu     | phosphatidylinositol glycan anchor biosynthesis, class U(Pigu)                                                              | Mus musculus |
| Pitpna   | phosphatidylinositol transfer protein, alpha(Pitpna)                                                                        | Mus musculus |
| Pitpnc1  | phosphatidylinositol transfer protein, cytoplasmic 1(Pitpnc1)                                                               | Mus musculus |
| Pip4k2b  | phosphatidylinositol-5-phosphate 4-kinase, type II, beta(Pip4k2b)                                                           | Mus musculus |
| Pde1a    | phosphodiesterase 1A, calmodulin-dependent(Pde1a)                                                                           | Mus musculus |
| Pde1b    | phosphodiesterase 1B, Ca <sup>2+</sup> -calmodulin dependent(Pde1b)                                                         | Mus musculus |
| Pde2a    | phosphodiesterase 2A, cGMP-stimulated(Pde2a)                                                                                | Mus musculus |
| Pfkl     | phosphofructokinase, liver, B-type(Pfkl)                                                                                    | Mus musculus |
| Pfkm     | phosphofructokinase, muscle(Pfkm)                                                                                           | Mus musculus |
| Pfkp     | phosphofructokinase, platelet(Pfkp)                                                                                         | Mus musculus |
| Pgm1     | phosphoglucomutase 1(Pgm1)                                                                                                  | Mus musculus |
| Pgm211   | phosphoglucomutase 2-like 1(Pgm211)                                                                                         | Mus musculus |
| Pgk1     | phosphoglycerate kinase 1(Pgk1)                                                                                             | Mus musculus |
| Pgam1    | phosphoglycerate mutase 1(Pgam1)                                                                                            | Mus musculus |
| Phpt1    | phosphohistidine phosphatase 1(Phpt1)                                                                                       | Mus musculus |
| Plcb1    | phospholipase C, beta 1(Plcb1)                                                                                              | Mus musculus |
| Plch2    | phospholipase C, eta 2(Plch2)                                                                                               | Mus musculus |
| Pld3     | phospholipase D family, member 3(Pld3)                                                                                      | Mus musculus |
| Prps1    | phosphoribosyl pyrophosphate synthetase 1(Prps1)                                                                            | Mus musculus |
| Paics    | phosphoribosylaminoimidazole carboxylase,<br>phosphoribosylaminoribosylaminoimidazole, succinocarboxamide synthetase(Paics) | Mus musculus |
| Psat1    | phosphoserine aminotransferase 1(Psat1)                                                                                     | Mus musculus |
| Phyhip   | phytanoyl-CoA hydroxylase interacting protein(Phyhip)                                                                       | Mus musculus |
| Pls3     | plastin 3 (T-isoform)(Pls3)                                                                                                 | Mus musculus |
| Pafah1b1 | platelet-activating factor acetylhydrolase, isoform 1b, subunit 1(Pafah1b1)                                                 | Mus musculus |
| Psd3     | pleckstrin and Sec7 domain containing 3(Psd3)                                                                               | Mus musculus |
| Plxna1   | plexin A1(Plxna1)                                                                                                           | Mus musculus |
| Plxnb2   | plexin B2(Plxnb2)                                                                                                           | Mus musculus |
| Porcn    | porcupine homolog (Drosophila)(Porcn)                                                                                       | Mus musculus |
| Kctd16   | potassium channel tetramerisation domain containing 16(Kctd16)                                                              | Mus musculus |
| Kcnma1   | potassium large conductance calcium-activated channel, subfamily M, alpha member 1(Kcnma1)                                  | Mus musculus |
| Kcnab2   | potassium voltage-gated channel, shaker-related subfamily, beta member 2(Kcnab2)                                            | Mus musculus |
| Kcna1    | potassium voltage-gated channel, shaker-related subfamily, member 1(Kcna1)                                                  | Mus musculus |
| Kcna2    | potassium voltage-gated channel, shaker-related subfamily, member 2(Kcna2)                                                  | Mus musculus |
| Pcyox11  | prenylcysteine oxidase 1 like(Pcyox11)                                                                                      | Mus musculus |
| Pcyox1   | prenylcysteine oxidase 1(Pcyox1)                                                                                            | Mus musculus |
| Prnp     | prion protein(Prnp)                                                                                                         | Mus musculus |

## SUPPLEMENTARY DATA

|         |                                                                    |              |
|---------|--------------------------------------------------------------------|--------------|
| Pfn2    | profilin 2(Pfn2)                                                   | Mus musculus |
| Pdcd6ip | programmed cell death 6 interacting protein(Pdcd6ip)               | Mus musculus |
| Phb2    | prohibitin 2(Phb2)                                                 | Mus musculus |
| Phb     | prohibitin(Phb)                                                    | Mus musculus |
| Preb    | prolactin regulatory element binding(Preb)                         | Mus musculus |
| Prrt3   | proline-rich transmembrane protein 3(Prrt3)                        | Mus musculus |
| Prep    | prolyl endopeptidase(Prep)                                         | Mus musculus |
| Prom1   | prominin 1(Prom1)                                                  | Mus musculus |
| Pcsk2   | proprotein convertase subtilisin/kexin type 2(Pcsk2)               | Mus musculus |
| Psap    | prosaposin(Psap)                                                   | Mus musculus |
| Ptges3  | prostaglandin E synthase 3 (cytosolic)(Ptges3)                     | Mus musculus |
| Ptgfrn  | prostaglandin F2 receptor negative regulator(Ptgfrn)               | Mus musculus |
| Psma1   | proteasome (prosome, macropain) subunit, alpha type 1(Psma1)       | Mus musculus |
| Psma2   | proteasome (prosome, macropain) subunit, alpha type 2(Psma2)       | Mus musculus |
| Psma3   | proteasome (prosome, macropain) subunit, alpha type 3(Psma3)       | Mus musculus |
| Psma4   | proteasome (prosome, macropain) subunit, alpha type 4(Psma4)       | Mus musculus |
| Psma5   | proteasome (prosome, macropain) subunit, alpha type 5(Psma5)       | Mus musculus |
| Psma6   | proteasome (prosome, macropain) subunit, alpha type 6(Psma6)       | Mus musculus |
| Psma7   | proteasome (prosome, macropain) subunit, alpha type 7(Psma7)       | Mus musculus |
| Psmb1   | proteasome (prosome, macropain) subunit, beta type 1(Psmb1)        | Mus musculus |
| Psmb3   | proteasome (prosome, macropain) subunit, beta type 3(Psmb3)        | Mus musculus |
| Psmb4   | proteasome (prosome, macropain) subunit, beta type 4(Psmb4)        | Mus musculus |
| Psmb5   | proteasome (prosome, macropain) subunit, beta type 5(Psmb5)        | Mus musculus |
| Psmb6   | proteasome (prosome, macropain) subunit, beta type 6(Psmb6)        | Mus musculus |
| Psmb7   | proteasome (prosome, macropain) subunit, beta type 7(Psmb7)        | Mus musculus |
| Pofut2  | protein O-fucosyltransferase 2(Pofut2)                             | Mus musculus |
| Prmt1   | protein arginine N-methyltransferase 1(Prmt1)                      | Mus musculus |
| Prmt8   | protein arginine N-methyltransferase 8(Prmt8)                      | Mus musculus |
| Pdia3   | protein disulfide isomerase associated 3(Pdia3)                    | Mus musculus |
| Pdia4   | protein disulfide isomerase associated 4(Pdia4)                    | Mus musculus |
| Pdia6   | protein disulfide isomerase associated 6(Pdia6)                    | Mus musculus |
| Pacsin1 | protein kinase C and casein kinase substrate in neurons 1(Pacsin1) | Mus musculus |
| Prkca   | protein kinase C, alpha(Prkca)                                     | Mus musculus |
| Prkcb   | protein kinase C, beta(Prkcb)                                      | Mus musculus |
| Prkcg   | protein kinase C, gamma(Prkcg)                                     | Mus musculus |
| Prkar2a | protein kinase, cAMP dependent regulatory, type II alpha(Prkar2a)  | Mus musculus |
| Prkar2b | protein kinase, cAMP dependent regulatory, type II beta(Prkar2b)   | Mus musculus |
| Prkaca  | protein kinase, cAMP dependent, catalytic, alpha(Prkaca)           | Mus musculus |
| Prkacb  | protein kinase, cAMP dependent, catalytic, beta(Prkacb)            | Mus musculus |
| Ppp1cb  | protein phosphatase 1, catalytic subunit, beta isoform(Ppp1cb)     | Mus musculus |

## SUPPLEMENTARY DATA

|         |                                                                                            |              |
|---------|--------------------------------------------------------------------------------------------|--------------|
| Ppp1cc  | protein phosphatase 1, catalytic subunit, gamma isoform(Ppp1cc)                            | Mus musculus |
| Ppp1r7  | protein phosphatase 1, regulatory (inhibitor) subunit 7(Ppp1r7)                            | Mus musculus |
| Ppp2ca  | protein phosphatase 2 (formerly 2A), catalytic subunit, alpha isoform(Ppp2ca)              | Mus musculus |
| Ppp2r2a | protein phosphatase 2, regulatory subunit B, alpha(Ppp2r2a)                                | Mus musculus |
| Ppp3ca  | protein phosphatase 3, catalytic subunit, alpha isoform(Ppp3ca)                            | Mus musculus |
| Ppp3r1  | protein phosphatase 3, regulatory subunit B, alpha isoform (calcineurin B, type I)(Ppp3r1) | Mus musculus |
| Ptpn11  | protein tyrosine phosphatase, non-receptor type 11(Ptpn11)                                 | Mus musculus |
| Ptpn9   | protein tyrosine phosphatase, non-receptor type 9(Ptpn9)                                   | Mus musculus |
| Ptprz1  | protein tyrosine phosphatase, receptor type Z, polypeptide 1(Ptprz1)                       | Mus musculus |
| Ptpra   | protein tyrosine phosphatase, receptor type, A(Ptpra)                                      | Mus musculus |
| Ptprd   | protein tyrosine phosphatase, receptor type, D(Ptprd)                                      | Mus musculus |
| Ptprn2  | protein tyrosine phosphatase, receptor type, N polypeptide 2(Ptprn2)                       | Mus musculus |
| Ptprn   | protein tyrosine phosphatase, receptor type, N(Ptprn)                                      | Mus musculus |
| Ptprs   | protein tyrosine phosphatase, receptor type, S(Ptprs)                                      | Mus musculus |
| Pcmt1   | protein-L-isoaspartate (D-aspartate) O-methyltransferase 1(Pcmt1)                          | Mus musculus |
| Plp1    | proteolipid protein (myelin) 1(Plp1)                                                       | Mus musculus |
| Ptma    | prothymosin alpha(Ptma)                                                                    | Mus musculus |
| Pura    | purine rich element binding protein A(Pura)                                                | Mus musculus |
| Pdxk    | pyridoxal (pyridoxine, vitamin B6) kinase(Pdxk)                                            | Mus musculus |
| Pdpx    | pyridoxal (pyridoxine, vitamin B6) phosphatase(Pdpx)                                       | Mus musculus |
| Pkm     | pyruvate kinase, muscle(Pkm)                                                               | Mus musculus |
| Qdpr    | quinoid dihydropteridine reductase(Qdpr)                                                   | Mus musculus |
| Rph3a   | rabphilin 3A(Rph3a)                                                                        | Mus musculus |
| Rhoa    | ras homolog family member A(Rhoa)                                                          | Mus musculus |
| Rhob    | ras homolog family member B(Rhob)                                                          | Mus musculus |
| Reep5   | receptor accessory protein 5(Reep5)                                                        | Mus musculus |
| Rgs7    | regulator of G protein signaling 7(Rgs7)                                                   | Mus musculus |
| Rras    | related RAS viral (r-ras) oncogene(Rras)                                                   | Mus musculus |
| Rtn1    | reticulon 1(Rtn1)                                                                          | Mus musculus |
| Rtn3    | reticulon 3(Rtn3)                                                                          | Mus musculus |
| Rtn4    | reticulon 4(Rtn4)                                                                          | Mus musculus |
| Rpn2    | ribophorin II(Rpn2)                                                                        | Mus musculus |
| Rpl10a  | ribosomal protein L10A(Rpl10a)                                                             | Mus musculus |
| Rps27a  | ribosomal protein S27A(Rps27a)                                                             | Mus musculus |
| Ryr2    | ryanodine receptor 2, cardiac(Ryr2)                                                        | Mus musculus |
| Scarb2  | scavenger receptor class B, member 2(Scarb2)                                               | Mus musculus |
| Scrn1   | secernin 1(Scrn1)                                                                          | Mus musculus |
| Sez6l2  | seizure related 6 homolog like 2(Sez6l2)                                                   | Mus musculus |
| Sez6l   | seizure related 6 homolog like(Sez6l)                                                      | Mus musculus |



## SUPPLEMENTARY DATA

|          |                                                                                                                          |              |
|----------|--------------------------------------------------------------------------------------------------------------------------|--------------|
| Sel11    | sel-1 suppressor of lin-12-like ( <i>C. elegans</i> )(Sel11)                                                             | Mus musculus |
| Sema4a   | sema domain, immunoglobulin domain (Ig), transmembrane domain (TM) and short cytoplasmic domain, (semaphorin) 4A(Sema4a) | Mus musculus |
| Serpini1 | serine (or cysteine) peptidase inhibitor, clade I, member 1(Serpini1)                                                    | Mus musculus |
| Serinc1  | serine incorporator 1(Serinc1)                                                                                           | Mus musculus |
| Srr      | serine racemase(Srr)                                                                                                     | Mus musculus |
| Strap    | serine/threonine kinase receptor associated protein(Strap)                                                               | Mus musculus |
| Sfxn1    | sideroflexin 1(Sfxn1)                                                                                                    | Mus musculus |
| Sfxn3    | sideroflexin 3(Sfxn3)                                                                                                    | Mus musculus |
| Sfxn5    | sideroflexin 5(Sfxn5)                                                                                                    | Mus musculus |
| Sigmar1  | sigma non-opioid intracellular receptor 1(Sigmar1)                                                                       | Mus musculus |
| Spcs3    | signal peptidase complex subunit 3 homolog ( <i>S. cerevisiae</i> )(Spcs3)                                               | Mus musculus |
| Ssr4     | signal sequence receptor, delta(Ssr4)                                                                                    | Mus musculus |
| Sirpa    | signal-regulatory protein alpha(Sirpa)                                                                                   | Mus musculus |
| Sirt2    | sirtuin 2(Sirt2)                                                                                                         | Mus musculus |
| Scn4b    | sodium channel, type IV, beta(Scn4b)                                                                                     | Mus musculus |
| Scn1b    | sodium channel, voltage-gated, type I, beta(Scn1b)                                                                       | Mus musculus |
| Scn2b    | sodium channel, voltage-gated, type II, beta(Scn2b)                                                                      | Mus musculus |
| Scn3b    | sodium channel, voltage-gated, type III, beta(Scn3b)                                                                     | Mus musculus |
| Slc1a2   | solute carrier family 1 (glial high affinity glutamate transporter), member 2(Slc1a2)                                    | Mus musculus |
| Slc1a3   | solute carrier family 1 (glial high affinity glutamate transporter), member 3(Slc1a3)                                    | Mus musculus |
| Slc1a4   | solute carrier family 1 (glutamate/neutral amino acid transporter), member 4(Slc1a4)                                     | Mus musculus |
| Slc1a1   | solute carrier family 1 (neuronal/epithelial high affinity glutamate transporter, system Xag), member 1(Slc1a1)          | Mus musculus |
| Slc12a5  | solute carrier family 12, member 5(Slc12a5)                                                                              | Mus musculus |
| Slc12a6  | solute carrier family 12, member 6(Slc12a6)                                                                              | Mus musculus |
| Slc15a2  | solute carrier family 15 (H <sup>+</sup> /peptide transporter), member 2(Slc15a2)                                        | Mus musculus |
| Slc16a1  | solute carrier family 16 (monocarboxylic acid transporters), member 1(Slc16a1)                                           | Mus musculus |
| Slc17a6  | solute carrier family 17 (sodium-dependent inorganic phosphate cotransporter), member 6(Slc17a6)                         | Mus musculus |
| Slc2a1   | solute carrier family 2 (facilitated glucose transporter), member 1(Slc2a1)                                              | Mus musculus |
| Slc2a13  | solute carrier family 2 (facilitated glucose transporter), member 13(Slc2a13)                                            | Mus musculus |
| Slc2a3   | solute carrier family 2 (facilitated glucose transporter), member 3(Slc2a3)                                              | Mus musculus |
| Slc22a23 | solute carrier family 22, member 23(Slc22a23)                                                                            | Mus musculus |
| Slc25a11 | solute carrier family 25 (mitochondrial carrier oxoglutarate carrier), member 11(Slc25a11)                               | Mus musculus |
| Slc25a18 | solute carrier family 25 (mitochondrial carrier), member 18(Slc25a18)                                                    | Mus musculus |
| Slc25a12 | solute carrier family 25 (mitochondrial carrier, Aralar), member 12(Slc25a12)                                            | Mus musculus |
| Slc25a4  | solute carrier family 25 (mitochondrial carrier, adenine nucleotide translocator), member 4(Slc25a4)                     | Mus musculus |
| Slc25a5  | solute carrier family 25 (mitochondrial carrier, adenine nucleotide translocator), member 5(Slc25a5)                     | Mus musculus |
| Slc25a22 | solute carrier family 25 (mitochondrial carrier, glutamate), member 22(Slc25a22)                                         | Mus musculus |
| Slc25a3  | solute carrier family 25 (mitochondrial carrier, phosphate carrier), member 3(Slc25a3)                                   | Mus musculus |

## SUPPLEMENTARY DATA

|          |                                                                                                    |              |
|----------|----------------------------------------------------------------------------------------------------|--------------|
| Slc3a2   | solute carrier family 3 (activators of dibasic and neutral amino acid transport), member 2(Slc3a2) | Mus musculus |
| Slc30a1  | solute carrier family 30 (zinc transporter), member 1(Slc30a1)                                     | Mus musculus |
| Slc30a3  | solute carrier family 30 (zinc transporter), member 3(Slc30a3)                                     | Mus musculus |
| Slc30a7  | solute carrier family 30 (zinc transporter), member 7(Slc30a7)                                     | Mus musculus |
| Slc32a1  | solute carrier family 32 (GABA vesicular transporter), member 1(Slc32a1)                           | Mus musculus |
| Slc38a3  | solute carrier family 38, member 3(Slc38a3)                                                        | Mus musculus |
| Slc4a4   | solute carrier family 4 (anion exchanger), member 4(Slc4a4)                                        | Mus musculus |
| Slc4a7   | solute carrier family 4, sodium bicarbonate cotransporter, member 7(Slc4a7)                        | Mus musculus |
| Slc4a10  | solute carrier family 4, sodium bicarbonate cotransporter-like, member 10(Slc4a10)                 | Mus musculus |
| Slc6a17  | solute carrier family 6 (neurotransmitter transporter), member 17(Slc6a17)                         | Mus musculus |
| Slc6a1   | solute carrier family 6 (neurotransmitter transporter, GABA), member 1(Slc6a1)                     | Mus musculus |
| Slc6a11  | solute carrier family 6 (neurotransmitter transporter, GABA), member 11(Slc6a11)                   | Mus musculus |
| Slc6a7   | solute carrier family 6 (neurotransmitter transporter, L-proline), member 7(Slc6a7)                | Mus musculus |
| Slc6a3   | solute carrier family 6 (neurotransmitter transporter, dopamine), member 3(Slc6a3)                 | Mus musculus |
| Slc6a9   | solute carrier family 6 (neurotransmitter transporter, glycine), member 9(Slc6a9)                  | Mus musculus |
| Slc7a10  | solute carrier family 7 (cationic amino acid transporter, y+ system), member 10(Slc7a10)           | Mus musculus |
| Slc7a11  | solute carrier family 7 (cationic amino acid transporter, y+ system), member 11(Slc7a11)           | Mus musculus |
| Slc7a8   | solute carrier family 7 (cationic amino acid transporter, y+ system), member 8(Slc7a8)             | Mus musculus |
| Slc8a1   | solute carrier family 8 (sodium/calcium exchanger), member 1(Slc8a1)                               | Mus musculus |
| Slc8a2   | solute carrier family 8 (sodium/calcium exchanger), member 2(Slc8a2)                               | Mus musculus |
| Slc9a1   | solute carrier family 9 (sodium/hydrogen exchanger), member 1(Slc9a1)                              | Mus musculus |
| Slc9a3r1 | solute carrier family 9 (sodium/hydrogen exchanger), member 3 regulator 1(Slc9a3r1)                | Mus musculus |
| Sort1    | sortilin 1(Sort1)                                                                                  | Mus musculus |
| Sorcs2   | sortilin-related VPS10 domain containing receptor 2(Sorcs2)                                        | Mus musculus |
| Sorl1    | sortilin-related receptor, LDLR class A repeats-containing(Sorl1)                                  | Mus musculus |
| Spock2   | sparc/osteonectin, cwcv and kazal-like domains proteoglycan 2(Spock2)                              | Mus musculus |
| Sptan1   | spectrin alpha, non-erythrocytic 1(Sptan1)                                                         | Mus musculus |
| Sptbn1   | spectrin beta, non-erythrocytic 1(Sptbn1)                                                          | Mus musculus |
| Smpd3    | sphingomyelin phosphodiesterase 3, neutral(Smpd3)                                                  | Mus musculus |
| Stmn1    | stathmin 1(Stmn1)                                                                                  | Mus musculus |
| Sdf2     | stromal cell derived factor 2(Sdf2)                                                                | Mus musculus |
| Sdf4     | stromal cell derived factor 4(Sdf4)                                                                | Mus musculus |
| Sdha     | succinate dehydrogenase complex, subunit A, flavoprotein (Fp)(Sdha)                                | Mus musculus |
| Sdhb     | succinate dehydrogenase complex, subunit B, iron sulfur (Ip)(Sdhb)                                 | Mus musculus |
| Sdhc     | succinate dehydrogenase complex, subunit C, integral membrane protein(Sdhc)                        | Mus musculus |
| Suclg1   | succinate-CoA ligase, GDP-forming, alpha subunit(Suclg1)                                           | Mus musculus |
| Sucla2   | succinate-Coenzyme A ligase, ADP-forming, beta subunit(Sucla2)                                     | Mus musculus |
| Sod2     | superoxide dismutase 2, mitochondrial(Sod2)                                                        | Mus musculus |

## SUPPLEMENTARY DATA

|         |                                                                        |              |
|---------|------------------------------------------------------------------------|--------------|
| Syn1    | synapsin I(Syn1)                                                       | Mus musculus |
| Syn2    | synapsin II(Syn2)                                                      | Mus musculus |
| Sv2a    | synaptic vesicle glycoprotein 2 a(Sv2a)                                | Mus musculus |
| Sv2b    | synaptic vesicle glycoprotein 2 b(Sv2b)                                | Mus musculus |
| Sv2c    | synaptic vesicle glycoprotein 2c(Sv2c)                                 | Mus musculus |
| Syng1   | synaptogyrin 1(Syng1)                                                  | Mus musculus |
| Syng3   | synaptogyrin 3(Syng3)                                                  | Mus musculus |
| Synj1   | synaptojanin 1(Synj1)                                                  | Mus musculus |
| Syp     | synaptophysin(Syp)                                                     | Mus musculus |
| Synpr   | synaptoporin(Synpr)                                                    | Mus musculus |
| Snap25  | synaptosomal-associated protein 25(Snap25)                             | Mus musculus |
| Snap91  | synaptosomal-associated protein 91(Snap91)                             | Mus musculus |
| Syt1    | synaptotagmin I(Syt1)                                                  | Mus musculus |
| Syt2    | synaptotagmin II(Syt2)                                                 | Mus musculus |
| Syt3    | synaptotagmin III(Syt3)                                                | Mus musculus |
| Syt5    | synaptotagmin V(Syt5)                                                  | Mus musculus |
| Syt6    | synaptotagmin VI(Syt6)                                                 | Mus musculus |
| Syt7    | synaptotagmin VII(Syt7)                                                | Mus musculus |
| Syt11   | synaptotagmin XI(Syt11)                                                | Mus musculus |
| Stx1a   | syntaxin 1A (brain)(Stx1a)                                             | Mus musculus |
| Stx1b   | syntaxin 1B(Stx1b)                                                     | Mus musculus |
| Stxbp1  | syntaxin binding protein 1(Stxbp1)                                     | Mus musculus |
| Stxbp5  | syntaxin binding protein 5 (tomosyn)(Stxbp5)                           | Mus musculus |
| Stxbp5l | syntaxin binding protein 5-like(Stxbp5l)                               | Mus musculus |
| Snca    | synuclein, alpha(Snca)                                                 | Mus musculus |
| Tcp1    | t-complex protein 1(Tcp1)                                              | Mus musculus |
| Tnr     | tenascin R(Tnr)                                                        | Mus musculus |
| Tenm4   | teneurin transmembrane protein 4(Tenm4)                                | Mus musculus |
| Tspan2  | tetraspanin 2(Tspan2)                                                  | Mus musculus |
| Tspan7  | tetraspanin 7(Tspan7)                                                  | Mus musculus |
| Txndc5  | thioredoxin domain containing 5(Txndc5)                                | Mus musculus |
| Tmx3    | thioredoxin-related transmembrane protein 3(Tmx3)                      | Mus musculus |
| Tmx4    | thioredoxin-related transmembrane protein 4(Tmx4)                      | Mus musculus |
| Taldo1  | transaldolase 1(Taldo1)                                                | Mus musculus |
| Tfrc    | transferrin receptor(Tfrc)                                             | Mus musculus |
| Tagln3  | transgelin 3(Tagln3)                                                   | Mus musculus |
| Tkt     | transketolase(Tkt)                                                     | Mus musculus |
| Timm13  | translocase of inner mitochondrial membrane 13(Timm13)                 | Mus musculus |
| Tomm40  | translocase of outer mitochondrial membrane 40 homolog (yeast)(Tomm40) | Mus musculus |
| Tmed2   | transmembrane p24 trafficking protein 2(Tmed2)                         | Mus musculus |

## SUPPLEMENTARY DATA

|         |                                                                                                    |              |
|---------|----------------------------------------------------------------------------------------------------|--------------|
| Tmed5   | transmembrane p24 trafficking protein 5(Tmed5)                                                     | Mus musculus |
| Tmem109 | transmembrane protein 109(Tmem109)                                                                 | Mus musculus |
| Tmem33  | transmembrane protein 33(Tmem33)                                                                   | Mus musculus |
| Tpi1    | triosephosphate isomerase 1(Tpi1)                                                                  | Mus musculus |
| Wars    | tryptophanyl-tRNA synthetase(Wars)                                                                 | Mus musculus |
| Tppp    | tubulin polymerization promoting protein(Tppp)                                                     | Mus musculus |
| Tuba1a  | tubulin, alpha 1A(Tuba1a)                                                                          | Mus musculus |
| Tuba1b  | tubulin, alpha 1B(Tuba1b)                                                                          | Mus musculus |
| Tuba3a  | tubulin, alpha 3A(Tuba3a)                                                                          | Mus musculus |
| Tuba4a  | tubulin, alpha 4A(Tuba4a)                                                                          | Mus musculus |
| Tubb2a  | tubulin, beta 2A class IIA(Tubb2a)                                                                 | Mus musculus |
| Tubb3   | tubulin, beta 3 class III(Tubb3)                                                                   | Mus musculus |
| Tubb4a  | tubulin, beta 4A class IVA(Tubb4a)                                                                 | Mus musculus |
| Tubb4b  | tubulin, beta 4B class IVB(Tubb4b)                                                                 | Mus musculus |
| Tubb5   | tubulin, beta 5 class I(Tubb5)                                                                     | Mus musculus |
| Tpt1    | tumor protein, translationally-controlled 1(Tpt1)                                                  | Mus musculus |
| Ttyh1   | tweety family member 1(Ttyh1)                                                                      | Mus musculus |
| Ttyh3   | tweety family member 3(Ttyh3)                                                                      | Mus musculus |
| Ywhab   | tyrosine 3-monooxygenase/tryptophan 5-monooxygenase activation protein, beta polypeptide(Ywhab)    | Mus musculus |
| Ywhae   | tyrosine 3-monooxygenase/tryptophan 5-monooxygenase activation protein, epsilon polypeptide(Ywhae) | Mus musculus |
| Ywhah   | tyrosine 3-monooxygenase/tryptophan 5-monooxygenase activation protein, eta polypeptide(Ywhah)     | Mus musculus |
| Ywhag   | tyrosine 3-monooxygenase/tryptophan 5-monooxygenase activation protein, gamma polypeptide(Ywhag)   | Mus musculus |
| Ywhaq   | tyrosine 3-monooxygenase/tryptophan 5-monooxygenase activation protein, theta polypeptide(Ywhaq)   | Mus musculus |
| Ywhaz   | tyrosine 3-monooxygenase/tryptophan 5-monooxygenase activation protein, zeta polypeptide(Ywhaz)    | Mus musculus |
| Ubqln2  | ubiquilin 2(Ubqln2)                                                                                | Mus musculus |
| Uqcr2   | ubiquinol cytochrome c reductase core protein 2(Uqcr2)                                             | Mus musculus |
| Uqcrb   | ubiquinol-cytochrome c reductase binding protein(Uqcrb)                                            | Mus musculus |
| Uqcr1   | ubiquinol-cytochrome c reductase core protein 1(Uqcr1)                                             | Mus musculus |
| Uqcrh   | ubiquinol-cytochrome c reductase hinge protein(Uqcrh)                                              | Mus musculus |
| Uqcrfs1 | ubiquinol-cytochrome c reductase, Rieske iron-sulfur polypeptide 1(Uqcrfs1)                        | Mus musculus |
| Uqcrq   | ubiquinol-cytochrome c reductase, complex III subunit VII(Uqcrq)                                   | Mus musculus |
| Uqcr10  | ubiquinol-cytochrome c reductase, complex III subunit X(Uqcr10)                                    | Mus musculus |
| Uba52   | ubiquitin A-52 residue ribosomal protein fusion product 1(Uba52)                                   | Mus musculus |
| Ubb     | ubiquitin B(Ubb)                                                                                   | Mus musculus |
| Ubc     | ubiquitin C(Ubc)                                                                                   | Mus musculus |
| Uch11   | ubiquitin carboxy-terminal hydrolase L1(Uch11)                                                     | Mus musculus |
| Uch14   | ubiquitin carboxyl-terminal esterase L4(Uch14)                                                     | Mus musculus |
| Usp14   | ubiquitin specific peptidase 14(Usp14)                                                             | Mus musculus |

## SUPPLEMENTARY DATA

|          |                                                            |              |
|----------|------------------------------------------------------------|--------------|
| Usp5     | ubiquitin specific peptidase 5 (isopeptidase T)(Usp5)      | Mus musculus |
| Ube2n    | ubiquitin-conjugating enzyme E2N(Ube2n)                    | Mus musculus |
| Uba1     | ubiquitin-like modifier activating enzyme 1(Uba1)          | Mus musculus |
| Usmg5    | upregulated during skeletal muscle growth 5(Usmg5)         | Mus musculus |
| Rala     | v-ral simian leukemia viral oncogene A (ras related)(Rala) | Mus musculus |
| Vcp      | valosin containing protein(Vcp)                            | Mus musculus |
| Vcan     | versican(Vcan)                                             | Mus musculus |
| Vamp1    | vesicle-associated membrane protein 1(Vamp1)               | Mus musculus |
| Vamp2    | vesicle-associated membrane protein 2(Vamp2)               | Mus musculus |
| Vamp3    | vesicle-associated membrane protein 3(Vamp3)               | Mus musculus |
| Vsn11    | visinin-like 1(Vsn11)                                      | Mus musculus |
| Vdac1    | voltage-dependent anion channel 1(Vdac1)                   | Mus musculus |
| Vdac2    | voltage-dependent anion channel 2(Vdac2)                   | Mus musculus |
| Vdac3    | voltage-dependent anion channel 3(Vdac3)                   | Mus musculus |
| Zmpste24 | zinc metallopeptidase, STE24(Zmpste24)                     | Mus musculus |

**Supplementary Table 4A. WT-PFF vs WT-PBS, p<0.05**

| <b>T: Protein names</b>                                           | <b>T: Gene names</b> | <b>p-value</b> | <b>N: Student's T-test Difference WT_PFF_WT_PBS</b> |
|-------------------------------------------------------------------|----------------------|----------------|-----------------------------------------------------|
| FXFD domain-containing ion transport regulator 6                  | Fxyd6                | 9,54E-06       | -1,49151                                            |
| V-type proton ATPase 16 kDa proteolipid subunit                   | Atp6v0c              | 0,0187788      | -1,36233                                            |
| Vitamin K epoxide reductase complex subunit 1-like protein 1      | Vkorc111             | 0,0371741      | -1,27503                                            |
| Leukocyte surface antigen CD47                                    | Cd47                 | 0,0415083      | -1,27032                                            |
| Calcium/calmodulin-dependent protein kinase type II subunit delta | Camk2d               | 0,0105429      | -1,01205                                            |
| ES1 protein homolog, mitochondrial                                | D10Jhu81e            | 0,0445597      | -1,00389                                            |
| Activated RNA polymerase II transcriptional coactivator p15       | Sub1                 | 0,0115368      | -0,989217                                           |
| Prostaglandin E synthase 3                                        | Ptges3               | 0,014796       | -0,94448                                            |
| Synaptic vesicle glycoprotein 2B                                  | Sv2b                 | 4,01E-05       | -0,878362                                           |
| ER lumen protein-retaining receptor 1                             | Kdelr1               | 0,029555       | -0,875156                                           |
| Synaptic vesicle glycoprotein 2C                                  | Sv2c                 | 0,000400792    | -0,872033                                           |
| Synaptophysin                                                     | Syp                  | 0,0425388      | -0,810893                                           |
| Cytochrome c oxidase subunit 1                                    | Mtco1                | 0,0287111      | -0,756265                                           |
| Synaptogyrin-3                                                    | Syng3                | 0,0193059      | -0,74211                                            |
| Translocon-associated protein subunit alpha                       | Ssr1                 | 0,00318869     | -0,703674                                           |
| Ras-related protein Rab-35                                        | Rab35                | 0,0197242      | -0,671762                                           |
| Sodium-dependent proline transporter                              | Slc6a7               | 0,0405211      | -0,661181                                           |

## SUPPLEMENTARY DATA

|                                                                                                                                                      |             |             |           |
|------------------------------------------------------------------------------------------------------------------------------------------------------|-------------|-------------|-----------|
| Transmembrane protein 9B                                                                                                                             | Tmem9b      | 0,00516143  | -0,643358 |
| Lysophospholipid acyltransferase 7                                                                                                                   | Mboat7      | 0,00411008  | -0,638856 |
| Tetraspanin-14                                                                                                                                       | Tspan14     | 0,0439249   | -0,631043 |
| Protein-serine O-palmitoleoyltransferase porcupine                                                                                                   | Porcn       | 0,000408832 | -0,623231 |
| EGF-like repeat and discoidin I-like domain-containing protein 3                                                                                     | Edil3       | 0,0162579   | -0,602658 |
| CD82 antigen                                                                                                                                         | Cd82        | 3,88E-05    | -0,600763 |
| Synaptic vesicle glycoprotein 2A                                                                                                                     | Sv2a        | 3,40E-05    | -0,599348 |
| Wolframin                                                                                                                                            | Wfs1        | 0,0108699   | -0,588158 |
| Proton myo-inositol cotransporter                                                                                                                    | Slc2a13     | 0,000310516 | -0,585425 |
| Vesicular inhibitory amino acid transporter                                                                                                          | Slc32a1     | 0,000181915 | -0,578771 |
| Minor histocompatibility antigen H13                                                                                                                 | Hm13        | 0,0369369   | -0,574092 |
| Calpain-2 catalytic subunit                                                                                                                          | Capn2       | 0,0232283   | -0,546404 |
| Hyaluronan and proteoglycan link protein 1                                                                                                           | Hapln1      | 0,000185541 | -0,541986 |
| Heterogeneous nuclear ribonucleoprotein A1;Heterogeneous nuclear ribonucleoprotein A1, N-terminally processed                                        | Hnrnpa1     | 0,0327911   | -0,533033 |
| Synaptoporin                                                                                                                                         | Synpr       | 0,00204681  | -0,530895 |
| CD81 antigen                                                                                                                                         | Cd81        | 0,000199642 | -0,524076 |
| F-box only protein 2                                                                                                                                 | Fbxo2       | 1,95E-06    | -0,522158 |
| Phosphatidate cytidyltransferase 2                                                                                                                   | Cds2        | 0,00452057  | -0,521939 |
| Versican core protein                                                                                                                                | Vcan        | 2,17E-05    | -0,515589 |
| Peptidyl-glycine alpha-amidating monooxygenase;Peptidylglycine alpha-hydroxylating monooxygenase;Peptidyl-alpha-hydroxyglycine alpha-amidating lyase | Pam         | 0,013519    | -0,509539 |
| Reticulon-3                                                                                                                                          | Rtn3        | 0,0239601   | -0,500438 |
| Vesicular integral-membrane protein VIP36                                                                                                            | Lman2       | 0,000459893 | -0,495477 |
| Vesicle-associated membrane protein 2;Vesicle-associated membrane protein 3                                                                          | Vamp2;Vamp3 | 0,0014504   | -0,482781 |
| Myelin proteolipid protein                                                                                                                           | Plp1        | 0,00161421  | -0,476665 |
| Testican-2                                                                                                                                           | Spock2      | 0,000187286 | -0,466429 |
| Lysosome-associated membrane glycoprotein 1                                                                                                          | Lamp1       | 0,00185689  | -0,455204 |
| Sodium- and chloride-dependent GABA transporter 3                                                                                                    | Slc6a11     | 0,000748835 | -0,449916 |
| Vesicle-associated membrane protein 1                                                                                                                | Vamp1       | 0,000558004 | -0,437785 |
| Solute carrier family 2, facilitated glucose transporter member 1                                                                                    | Slc2a1      | 0,0320502   | -0,434549 |
| Lipid phosphate phosphohydrolase 3                                                                                                                   | Ppap2b      | 0,00200251  | -0,43239  |
| Nucleobindin-2;Nesfatin-1                                                                                                                            | Nucb2       | 0,0438185   | -0,431645 |
| Vesicular glutamate transporter 2                                                                                                                    | Slc17a6     | 0,000167767 | -0,430577 |
| Protein canopy homolog 2                                                                                                                             | Cnpy2       | 0,00200873  | -0,43     |
| Choline transporter-like protein 1                                                                                                                   | Slc44a1     | 0,000247457 | -0,429364 |
| Vesicular glutamate transporter 1                                                                                                                    | Slc17a7     | 0,000537312 | -0,429029 |
| Receptor-type tyrosine-protein phosphatase eta                                                                                                       | Ptprj       | 0,0357804   | -0,418557 |

## SUPPLEMENTARY DATA

|                                                                  |             |                  |                  |
|------------------------------------------------------------------|-------------|------------------|------------------|
| Cell cycle control protein 50A                                   | Tmem30a     | 0,00181081       | -0,416028        |
| Large neutral amino acids transporter small subunit 2            | Slc7a8      | 0,00138121       | -0,414866        |
| Protein kinase C beta type                                       | Prkcb       | 0,00617344       | -0,411249        |
| Major prion protein                                              | Prnp        | 0,0287849        | -0,408547        |
| Phospholipid hydroperoxide glutathione peroxidase, mitochondrial | Gpx4        | 0,000120633      | -0,397795        |
| Cathepsin B;Cathepsin B light chain;Cathepsin B heavy chain      | Ctsb        | 0,0272632        | -0,393795        |
| Sodium- and chloride-dependent GABA transporter 1                | Slc6a1      | 0,00141876       | -0,389411        |
| Leukocyte surface antigen CD47                                   | Cd47        | 0,0299456        | -0,386457        |
| Mammalian ependymin-related protein 1                            | Epdr1       | 0,0319671        | -0,380023        |
| Choline transporter-like protein 2                               | Slc44a2     | 0,00158766       | -0,377591        |
| Zinc transporter 7                                               | Slc30a7     | 0,0380496        | -0,373542        |
| 1-acyl-sn-glycerol-3-phosphate acyltransferase gamma             | Agpat3      | 0,000166675      | -0,372851        |
| RasGAP-activating-like protein 1                                 | Rasal1      | 0,0147433        | -0,365455        |
| Sortilin                                                         | Sort1       | 0,0435849        | -0,365001        |
| Calsyntenin-1;Soluble Alc-alpha;CTF1-alpha                       | Clstn1      | 0,0139328        | -0,357298        |
| Myelin-oligodendrocyte glycoprotein                              | Mog         | 0,00449075       | -0,354827        |
| NADH-ubiquinone oxidoreductase chain 4                           | Mtnd4       | 0,0481246        | -0,352002        |
| Protein ERGIC-53                                                 | Lman1       | 0,00613756       | -0,351348        |
| Cation-dependent mannose-6-phosphate receptor                    | M6pr        | 0,0399084        | -0,351323        |
| LMBR1 domain-containing protein 2                                | Lmbrd2      | 0,0178484        | -0,348872        |
| Sodium/calcium exchanger 1                                       | Slc8a1      | 0,0120078        | -0,347932        |
| Calnexin                                                         | Canx        | 0,00272656       | -0,339254        |
| Synaptotagmin-6                                                  | Syt6        | 0,00625574       | -0,338711        |
| Adipocyte plasma membrane-associated protein                     | Apmap       | 0,0014907        | -0,327901        |
| Glycerophosphodiester phosphodiesterase 1                        | Gde1        | 8,94E-05         | -0,326875        |
| <b>Complement C1q subcomponent subunit B</b>                     | <b>C1qb</b> | <b>0,0458818</b> | <b>-0,324519</b> |
| Neurocan core protein                                            | Ncan        | 0,0259454        | -0,323012        |
| Coactosin-like protein                                           | Cotl1       | 0,0135496        | -0,313434        |
| Seizure 6-like protein                                           | Sez6l       | 0,0059714        | -0,312532        |
| Fatty aldehyde dehydrogenase                                     | Aldh3a2     | 0,000715107      | -0,310583        |
| NADH-ubiquinone oxidoreductase chain 5                           | Mtnd5       | 0,0480591        | -0,307791        |
| Histone deacetylase 11                                           | Hdac11      | 0,0392313        | -0,304612        |
| Reticulon-1                                                      | Rtn1        | 0,0362946        | -0,300543        |
| Phosphatidylinositol transfer protein alpha isoform              | Pitpna      | 0,0259323        | -0,300199        |
| BDNF/NT-3 growth factors receptor                                | Ntrk2       | 0,0116264        | -0,298212        |
| Calreticulin                                                     | Calr        | 2,02E-06         | -0,297306        |
| Transforming protein RhoA;Rho-related GTP-binding protein RhoC   | Rhoa;Rhoc   | 0,00145806       | -0,296901        |
| OX-2 membrane glycoprotein                                       | Cd200       | 0,0129486        | -0,296732        |

## SUPPLEMENTARY DATA

|                                                                |         |             |           |
|----------------------------------------------------------------|---------|-------------|-----------|
| Receptor-type tyrosine-protein phosphatase zeta                | Ptprz1  | 0,00913895  | -0,295259 |
| Electrogenic sodium bicarbonate cotransporter 1                | Slc4a4  | 0,00696435  | -0,294361 |
| Metallo-beta-lactamase domain-containing protein 2             | Mblac2  | 0,00256795  | -0,289748 |
| Superoxide dismutase [Cu-Zn]                                   | Sod1    | 0,000958982 | -0,28261  |
| Sodium-driven chloride bicarbonate exchanger                   | Slc4a10 | 0,0210161   | -0,280824 |
| VIP36-like protein                                             | Lman2l  | 0,0404633   | -0,280123 |
| Sodium-dependent neutral amino acid transporter SLC6A17        | Slc6a17 | 0,00634699  | -0,279623 |
| LDLR chaperone MESD                                            | Mesdc2  | 0,000633798 | -0,276967 |
| Malectin                                                       | Mlec    | 0,0420262   | -0,276619 |
| Neuroplastin                                                   | Nptn    | 0,000833853 | -0,273702 |
| Transmembrane anterior posterior transformation protein 1      | Tapt1   | 0,000952583 | -0,269638 |
| Serotransferrin                                                | Tf      | 0,000925889 | -0,268287 |
| Translocon-associated protein subunit delta                    | Ssr4    | 0,000925914 | -0,265836 |
| Neuroigin-3                                                    | Nlgn3   | 0,0115132   | -0,257396 |
| Thy-1 membrane glycoprotein                                    | Thy1    | 1,63E-05    | -0,255935 |
| Neuritin                                                       | Nrn1    | 0,0250513   | -0,24884  |
| Disintegrin and metalloproteinase domain-containing protein 10 | Adam10  | 0,00704405  | -0,231585 |
| Copine-6                                                       | Cpne6   | 0,00206259  | -0,224158 |
| Peptidyl-prolyl cis-trans isomerase B                          | Ppib    | 0,0152842   | -0,221758 |
| VPS10 domain-containing receptor SorCS2                        | Sorcs2  | 0,00665485  | -0,220219 |
| Isocitrate dehydrogenase [NAD] subunit gamma 1, mitochondrial  | Idh3g   | 0,0264954   | -0,219021 |
|                                                                | Slc8a2  | 0,0235718   | -0,21891  |
| Annexin A2                                                     | Anxa2   | 0,0309055   | -0,217128 |
| Gamma-aminobutyric acid type B receptor subunit 1              | Gabbr1  | 0,043548    | -0,206122 |
| Calumenin                                                      | Calu    | 0,0442553   | -0,205351 |
| Solute carrier family 15 member 2                              | Slc15a2 | 0,0400082   | -0,203035 |
| Copine-2                                                       | Cpne2   | 0,0471587   | -0,202485 |
| Probable phospholipid-transporting ATPase IIA                  | Atp9a   | 0,00107839  | -0,197225 |
| DnaJ homolog subfamily C member 5                              | Dnajc5  | 0,0357776   | -0,18004  |
| Glutamate receptor 2                                           | Gria2   | 0,00169103  | -0,172306 |
| Solute carrier family 12 member 5                              | Slc12a5 | 0,0343282   | -0,170692 |
| Endoplasmic                                                    | Hsp90b1 | 0,00306544  | -0,145062 |
| Prolactin regulatory element-binding protein                   | Preb    | 0,0490008   | -0,134829 |
| Protein disulfide-isomerase A3                                 | Pdia3   | 0,0450888   | 0,127046  |
| Synapsin-1                                                     | Syn1    | 0,00628246  | 0,152398  |
| Aspartate aminotransferase, mitochondrial                      | Got2    | 0,0442888   | 0,181829  |
| cAMP-dependent protein kinase type II-beta regulatory subunit  | Prkar2b | 0,0294583   | 0,19547   |
| Cytoplasmic FMR1-interacting protein 2                         | Cyfi2   | 0,0467279   | 0,196776  |



## SUPPLEMENTARY DATA

|                                                                                          |             |             |          |
|------------------------------------------------------------------------------------------|-------------|-------------|----------|
| Nck-associated protein 1                                                                 | Nckap1      | 0,0492714   | 0,199383 |
| Glycerophosphodiester phosphodiesterase domain-containing protein 1                      | Gdpd1       | 0,0338613   | 0,20286  |
| Cytosol aminopeptidase                                                                   | Lap3        | 0,00191361  | 0,2115   |
| Plexin-A4                                                                                | Plxna4      | 0,0107601   | 0,2117   |
| Glycogen phosphorylase, brain form                                                       | Pygb        | 0,0254589   | 0,216621 |
| Glyceraldehyde-3-phosphate dehydrogenase                                                 | Gapdh       | 0,033488    | 0,221876 |
| Puromycin-sensitive aminopeptidase                                                       | Npepps      | 0,0153863   | 0,222261 |
| Proteasome subunit alpha type-4                                                          | Psma4       | 0,00481505  | 0,224378 |
| 2-oxoglutarate dehydrogenase, mitochondrial                                              | Ogdh        | 0,00856472  | 0,229626 |
| Phosphoglycerate mutase 1                                                                | Pgam1       | 0,0068678   | 0,243425 |
| AP-2 complex subunit beta                                                                | Ap2b1       | 0,0132486   | 0,244782 |
| Synaptojanin-1                                                                           | Synj1       | 0,0192514   | 0,2468   |
| cGMP-dependent 3,5-cyclic phosphodiesterase                                              | Pde2a       | 0,00298158  | 0,250251 |
| Proteasome subunit beta type-1                                                           | Psmb1       | 0,0196729   | 0,250533 |
| Rab GDP dissociation inhibitor alpha                                                     | Gdi1        | 0,0105221   | 0,251526 |
| Transketolase                                                                            | Tkt         | 0,024793    | 0,251665 |
| Aconitate hydratase, mitochondrial                                                       | Aco2        | 0,036009    | 0,253626 |
| Tripeptidyl-peptidase 2                                                                  | Tpp2        | 0,01155     | 0,253681 |
| Aspartate aminotransferase, cytoplasmic                                                  | Got1        | 0,0307411   | 0,254863 |
| T-complex protein 1 subunit eta                                                          | Cct7        | 0,00868637  | 0,255004 |
| Ubiquitin thioesterase OTUB1                                                             | Otub1       | 0,0117815   | 0,255182 |
| Pyridoxal phosphate phosphatase                                                          | Pdpx        | 0,0221705   | 0,264516 |
| V-type proton ATPase subunit B, brain isoform                                            | Atp6v1b2    | 0,0430248   | 0,264796 |
| Glutamine synthetase                                                                     | Glul        | 0,0139078   | 0,2688   |
| Dihydropyrimidinase-related protein 1                                                    | Crmp1       | 0,0434174   | 0,272341 |
| Succinate-semialdehyde dehydrogenase, mitochondrial                                      | Aldh5a1     | 0,0351954   | 0,276262 |
| Serum albumin                                                                            | Alb         | 0,0266473   | 0,278005 |
| Ankyrin-2                                                                                | Ank2        | 0,0310507   | 0,280763 |
| Neuronal-specific septin-3                                                               | septin3     | 0,0258174   | 0,283168 |
| Leucine-rich repeat LGI family member 3                                                  | Lgi3        | 0,0440521   | 0,292939 |
| Ectonucleoside triphosphate diphosphohydrolase 2                                         | Entpd2      | 0,043532    | 0,299003 |
| Neurochondrin                                                                            | Ncdn        | 0,0363669   | 0,29937  |
| Plastin-3                                                                                | Pls3        | 0,000758252 | 0,300234 |
| Cytochrome c oxidase subunit 5A, mitochondrial                                           | Cox5a       | 0,0409579   | 0,302832 |
| Calcium-dependent secretion activator 1                                                  | Cadps       | 0,00420131  | 0,30807  |
| Protein phosphatase 1 regulatory subunit 7                                               | Ppp1r7      | 0,00695303  | 0,308827 |
| GTP-binding nuclear protein Ran;GTP-binding nuclear protein Ran, testis-specific isoform | Ran;Ras12-9 | 0,00314378  | 0,309265 |
| Transgelin-3                                                                             | Tagln3      | 0,0201966   | 0,310323 |
| Serine/threonine-protein kinase PAK 1                                                    | Pak1        | 0,0143686   | 0,310904 |

## SUPPLEMENTARY DATA

|                                                                                                                                                                                                                                                                                                                                 |           |             |          |
|---------------------------------------------------------------------------------------------------------------------------------------------------------------------------------------------------------------------------------------------------------------------------------------------------------------------------------|-----------|-------------|----------|
| T-complex protein 1 subunit alpha                                                                                                                                                                                                                                                                                               | Tcp1      | 0,00218294  | 0,312593 |
| Gamma-enolase                                                                                                                                                                                                                                                                                                                   | Eno2      | 0,00238598  | 0,312814 |
| Glucose-6-phosphate isomerase                                                                                                                                                                                                                                                                                                   | Gpi       | 0,00150873  | 0,327198 |
| LanC-like protein 2                                                                                                                                                                                                                                                                                                             | Lancl2    | 0,0413219   | 0,338553 |
| Septin-11                                                                                                                                                                                                                                                                                                                       | Septin 11 | 0,0037634   | 0,339436 |
| Stress-70 protein, mitochondrial                                                                                                                                                                                                                                                                                                | Hspa9     | 0,0189987   | 0,340007 |
| Receptor-type tyrosine-protein phosphatase alpha                                                                                                                                                                                                                                                                                | Ptptra    | 0,0149543   | 0,345342 |
| Annexin A7                                                                                                                                                                                                                                                                                                                      | Anxa7     | 4,33E-07    | 0,345957 |
| Adenylate kinase isoenzyme 1                                                                                                                                                                                                                                                                                                    | Ak1       | 0,04342     | 0,350232 |
| L-lactate dehydrogenase B chain                                                                                                                                                                                                                                                                                                 | Ldhb      | 0,0171563   | 0,351408 |
| Microtubule-associated protein 1A;MAP1A heavy chain;MAP1 light chain LC2                                                                                                                                                                                                                                                        | Map1a     | 0,00378644  | 0,352457 |
| Sepiapterin reductase                                                                                                                                                                                                                                                                                                           | Spr       | 0,0172131   | 0,352652 |
| Syntaxin-binding protein 1                                                                                                                                                                                                                                                                                                      | Stxbp1    | 0,000135837 | 0,354962 |
| Malate dehydrogenase, mitochondrial                                                                                                                                                                                                                                                                                             | Mdh2      | 0,00934282  | 0,355384 |
| Heat shock cognate 71 kDa protein                                                                                                                                                                                                                                                                                               | Hspa8     | 0,00104647  | 0,368092 |
| Glucose 1,6-bisphosphate synthase                                                                                                                                                                                                                                                                                               | Pgm211    | 0,00782415  | 0,368603 |
| Adenylyl cyclase-associated protein 2                                                                                                                                                                                                                                                                                           | Cap2      | 0,000102191 | 0,371693 |
| Dynamin-1-like protein                                                                                                                                                                                                                                                                                                          | Dnm11     | 0,00287795  | 0,372199 |
| Asparagine--tRNA ligase, cytoplasmic                                                                                                                                                                                                                                                                                            | Nars      | 0,0158695   | 0,374424 |
| Peripheral plasma membrane protein CASK                                                                                                                                                                                                                                                                                         | Cask      | 0,00434089  | 0,376783 |
| Ferritin light chain 1;Ferritin light chain 2                                                                                                                                                                                                                                                                                   | Ftl1;Ftl2 | 0,00836573  | 0,377582 |
| Protein NDRG3                                                                                                                                                                                                                                                                                                                   | Ndr3      | 0,00117687  | 0,382596 |
| Calbindin                                                                                                                                                                                                                                                                                                                       | Calb1     | 0,0457353   | 0,388447 |
| AP-2 complex subunit alpha-1                                                                                                                                                                                                                                                                                                    | Ap2a1     | 0,00611205  | 0,389236 |
| NAD-dependent protein deacetylase sirtuin-2                                                                                                                                                                                                                                                                                     | Sirt2     | 0,000327368 | 0,390787 |
| Clathrin heavy chain 1                                                                                                                                                                                                                                                                                                          | Cltc      | 0,000961608 | 0,393729 |
| Sideroflexin-1                                                                                                                                                                                                                                                                                                                  | Sfxn1     | 0,0427279   | 0,394024 |
| Fatty acid synthase;[Acyl-carrier-protein] S-acetyltransferase;[Acyl-carrier-protein] S-malonyltransferase;3-oxoacyl-[acyl-carrier-protein] synthase;3-oxoacyl-[acyl-carrier-protein] reductase;3-hydroxyacyl-[acyl-carrier-protein] dehydratase;Enoyl-[acyl-carrier-protein] reductase;Oleoyl-[acyl-carrier-protein] hydrolase | Fasn      | 0,0275734   | 0,394264 |
| Actin-related protein 2/3 complex subunit 4                                                                                                                                                                                                                                                                                     | Arpc4     | 0,0104574   | 0,39585  |
| Oligodendrocyte-myelin glycoprotein                                                                                                                                                                                                                                                                                             | Omg       | 0,00309066  | 0,396282 |
| V-type proton ATPase subunit H                                                                                                                                                                                                                                                                                                  | Atp6v1h   | 0,000170326 | 0,396813 |
| Spectrin alpha chain, non-erythrocytic 1                                                                                                                                                                                                                                                                                        | Sptan1    | 0,000751801 | 0,398356 |
| EF-hand domain-containing protein D2                                                                                                                                                                                                                                                                                            | Efhd2     | 0,0131318   | 0,400243 |
| Cullin-associated NEDD8-dissociated protein 1                                                                                                                                                                                                                                                                                   | Cand1     | 8,31E-06    | 0,401598 |
| Nucleoside diphosphate kinase A                                                                                                                                                                                                                                                                                                 | Nme1      | 0,000317849 | 0,404543 |
| Actin-related protein 3                                                                                                                                                                                                                                                                                                         | Actr3     | 0,000499882 | 0,404721 |

# SUPPLEMENTARY DATA

|                                                                                                                                       |                     |                    |                 |
|---------------------------------------------------------------------------------------------------------------------------------------|---------------------|--------------------|-----------------|
| Sideroflexin-3                                                                                                                        | Sfxn3               | 0,0154109          | 0,406693        |
| Creatine kinase B-type                                                                                                                | Ckb                 | 0,00727274         | 0,411031        |
| Calcium/calmodulin-dependent 3,5-cyclic nucleotide phosphodiesterase 1B                                                               | Pde1b               | 0,0447582          | 0,411787        |
| 14-3-3 protein gamma;14-3-3 protein gamma, N-terminally processed                                                                     | Ywhag               | 0,0324066          | 0,41542         |
| 14-3-3 protein zeta/delta                                                                                                             | Ywhaz               | 0,0151828          | 0,41671         |
| Protein FAM49B                                                                                                                        | Fam49b              | 0,023702           | 0,417568        |
| Endophilin-A1                                                                                                                         | Sh3gl2              | 4,92E-05           | 0,418188        |
| Adenosylhomocysteinase                                                                                                                | Ahcy                | 0,00198116         | 0,420219        |
| N(G),N(G)-dimethylarginine dimethylaminohydrolase 1                                                                                   | Ddah1               | 7,19E-05           | 0,420595        |
| Glycolipid transfer protein                                                                                                           | Gltp                | 0,0120891          | 0,425322        |
| Dynamin-1                                                                                                                             | Dnm1                | 2,54E-05           | 0,426923        |
| Isoaspartyl peptidase/L-asparaginase;Isoaspartyl peptidase/L-asparaginase alpha chain;Isoaspartyl peptidase/L-asparaginase beta chain | Asrgl1              | 0,00637641         | 0,428198        |
| Heat shock protein 105 kDa                                                                                                            | Hsph1               | 0,000384299        | 0,430151        |
| Cytoskeleton-associated protein 4                                                                                                     | Ckap4               | 0,0121184          | 0,431569        |
| Phosphoglucomutase-1                                                                                                                  | Pgm1                | 0,00847452         | 0,439041        |
| ADP/ATP translocase 1                                                                                                                 | Slc25a4             | 0,00205245         | 0,43944         |
| Dynactin subunit 1                                                                                                                    | Dctn1               | 0,0440181          | 0,441881        |
| <b>Dihydropteridine reductase</b>                                                                                                     | <b>Qdpr</b>         | <b>0,000694842</b> | <b>0,446637</b> |
| 14-3-3 protein epsilon                                                                                                                | Ywhae               | 0,00515894         | 0,448738        |
| T-complex protein 1 subunit delta                                                                                                     | Cct4                | 0,000780786        | 0,450316        |
| Beta-soluble NSF attachment protein                                                                                                   | Napb                | 2,63E-05           | 0,452127        |
| Cytochrome b-c1 complex subunit 7                                                                                                     | Uqcrb               | 0,0169594          | 0,453009        |
| Oxygen-dependent coproporphyrinogen-III oxidase, mitochondrial                                                                        | Cpox                | 0,044947           | 0,45466         |
|                                                                                                                                       | Pi4ka               | 0,0219533          | 0,464752        |
| Transitional endoplasmic reticulum ATPase                                                                                             | Vcp                 | 0,00243508         | 0,464807        |
| AP-3 complex subunit beta-2                                                                                                           | Ap3b2               | 0,0256224          | 0,469591        |
| Proteasome subunit alpha type-7                                                                                                       | Psma7               | 0,00191513         | 0,469615        |
| Citrate synthase, mitochondrial                                                                                                       | Cs                  | 2,21E-06           | 0,471481        |
| Protein-L-isoaspartate(D-aspartate) O-methyltransferase                                                                               | Pcmt1               | 0,00459129         | 0,472147        |
| Calcium-activated potassium channel subunit alpha-1                                                                                   | Kcnma1              | 0,009918           | 0,480657        |
| Septin-7                                                                                                                              | Septin7             | 8,56E-05           | 0,481258        |
| ATP-citrate synthase                                                                                                                  | Acly                | 0,000246838        | 0,48161         |
| Aldose reductase                                                                                                                      | Akr1b1              | 0,0113542          | 0,485765        |
| T-complex protein 1 subunit gamma                                                                                                     | Cct3                | 0,000168866        | 0,48621         |
| Alpha-1-antitrypsin 1-3;Alpha-1-antitrypsin 1-1                                                                                       | Serpina1c;Serpina1a | 5,54E-05           | 0,491736        |
| Myotrophin                                                                                                                            | Mtpn                | 0,0177333          | 0,491884        |
| Protein disulfide-isomerase A6                                                                                                        | Pdia6               | 4,07E-05           | 0,496739        |

# SUPPLEMENTARY DATA

|                                                                                   |                 |                    |                 |
|-----------------------------------------------------------------------------------|-----------------|--------------------|-----------------|
| Cytoplasmic dynein 1 heavy chain 1                                                | Dync1h1         | 0,0001423          | 0,50266         |
| Serine/threonine-protein phosphatase 2A 65 kDa regulatory subunit A alpha isoform | Ppp2r1a         | 4,13E-06           | 0,50769         |
| Actin, cytoplasmic 2;Actin, cytoplasmic 2, N-terminally processed                 | Actg1           | 3,90E-05           | 0,50885         |
| Peroxiredoxin-5, mitochondrial                                                    | Prdx5           | 1,51E-05           | 0,510156        |
| Serine/threonine-protein phosphatase 2A activator                                 | Ppp2r4          | 0,0119225          | 0,511246        |
| Coronin-1C                                                                        | Coro1c          | 0,0423629          | 0,514247        |
| ATP synthase subunit d, mitochondrial                                             | Atp5h           | 0,00139212         | 0,515256        |
| ATP synthase subunit gamma, mitochondrial                                         | Atp5c1          | 0,0103822          | 0,516166        |
| 14-3-3 protein eta                                                                | Ywhah           | 0,000779527        | 0,517593        |
| NADH dehydrogenase [ubiquinone] iron-sulfur protein 3, mitochondrial              | Ndufs3          | 0,0365672          | 0,520595        |
| Heterogeneous nuclear ribonucleoprotein K                                         | Hnrmpk          | 0,0064026          | 0,526251        |
| L-lactate dehydrogenase A chain                                                   | Ldha            | 0,0172894          | 0,5272          |
| Peroxiredoxin-6                                                                   | Prdx6           | 0,00534494         | 0,532777        |
| NADH dehydrogenase [ubiquinone] 1 beta subcomplex subunit 4                       | Ndufb4          | 0,00128975         | 0,534693        |
| Flotillin-1                                                                       | Flot1           | 0,000834587        | 0,534844        |
| Stress-induced-phosphoprotein 1                                                   | Stip1           | 0,0017079          | 0,54071         |
| Endoplasmic reticulum resident protein 29                                         | Erp29           | 7,58E-05           | 0,545627        |
| Catenin beta-1                                                                    | Ctnnb1          | 0,000190861        | 0,547346        |
| Glyoxalase domain-containing protein 4                                            | Glod4           | 0,0238438          | 0,547575        |
| Heat shock 70 kDa protein 4                                                       | Hspa4           | 2,97E-05           | 0,561926        |
| V-type proton ATPase catalytic subunit A                                          | Atp6v1a         | 5,24E-06           | 0,562685        |
| <b>Phosphoglycerate kinase 1</b>                                                  | <b>Pgk1</b>     | <b>0,000207664</b> | <b>0,570183</b> |
| Ferritin heavy chain;Ferritin heavy chain, N-terminally processed                 | Fth1            | 0,000127678        | 0,574652        |
|                                                                                   | Rap1gds1        | 2,38E-05           | 0,575078        |
| Regulator of G-protein signaling 7                                                | Rgs7            | 2,02E-05           | 0,577662        |
| <b>ATP synthase subunit alpha, mitochondrial</b>                                  | <b>Atp5a1</b>   | <b>0,00424607</b>  | <b>0,582673</b> |
| Microtubule-associated protein tau                                                | Mapt            | 1,65E-05           | 0,584386        |
| Spectrin beta chain, non-erythrocytic 1                                           | Sptbn1          | 9,08E-08           | 0,5845          |
| Leucine-rich repeat-containing protein 57                                         | Lrrc57          | 0,000560997        | 0,591595        |
| Serine/threonine-protein phosphatase 2B catalytic subunit alpha isoform           | Ppp3ca          | 2,26E-06           | 0,59394         |
| Carbonyl reductase [NADPH] 1                                                      | Cbr1            | 0,000795306        | 0,599431        |
| Alpha-synuclein                                                                   | Snca            | 0,0196293          | 0,607903        |
| Alpha-soluble NSF attachment protein                                              | Napa            | 4,50E-07           | 0,618211        |
| Hemoglobin subunit beta-1                                                         | Hbb-b1          | 4,79E-05           | 0,622062        |
| Septin-6                                                                          | septin6         | 0,0362116          | 0,628115        |
| V-type proton ATPase subunit C 1                                                  | Atp6v1c1        | 1,67E-05           | 0,628165        |
| Retinal dehydrogenase 1;Aldehyde dehydrogenase, cytosolic 1                       | Aldh1a1;Aldh1a7 | 0,0130772          | 0,636948        |
| Adenylosuccinate synthetase isozyme 2                                             | Adss            | 0,0148927          | 0,638455        |

## SUPPLEMENTARY DATA

|                                                                                   |               |                    |                 |
|-----------------------------------------------------------------------------------|---------------|--------------------|-----------------|
| Phosphoserine aminotransferase                                                    | Psat1         | 0,000318779        | 0,650101        |
| Gamma-soluble NSF attachment protein                                              | Napg          | 0,000200101        | 0,651157        |
| Serine-threonine kinase receptor-associated protein                               | Strap         | 0,035619           | 0,654308        |
| Regulator of G-protein signaling 6                                                | Rgs6          | 0,0141693          | 0,654316        |
| Syntaxin-binding protein 5                                                        | Stxbp5        | 0,00147625         | 0,668075        |
| Costars family protein ABRACL                                                     | Abracl        | 0,0465521          | 0,687604        |
| Mitochondrial import inner membrane translocase subunit Tim13                     | Timm13        | 0,0228607          | 0,690147        |
| ATP synthase subunit beta, mitochondrial                                          | Atp5b         | 0,000229986        | 0,693999        |
| <b>NADH-ubiquinone oxidoreductase 75 kDa subunit, mitochondrial</b>               | <b>Ndufs1</b> | <b>0,000750706</b> | <b>0,697835</b> |
| Protein phosphatase methylesterase 1                                              | Ppme1         | 0,00277136         | 0,703677        |
| Protein lin-7 homolog A                                                           | Lin7a         | 5,44E-08           | 0,70903         |
| Septin-5                                                                          | Septin7       | 0,00766679         | 0,710393        |
| CDP-diacylglycerol--glycerol-3-phosphate 3-phosphatidyltransferase, mitochondrial | Pgs1          | 0,0206099          | 0,711467        |
| DnaJ homolog subfamily C member 10                                                | Dnajc10       | 0,0278923          | 0,71899         |
|                                                                                   | Ttc7b         | 0,00255409         | 0,723217        |
| Heat shock 70 kDa protein 4L                                                      | Hspa4l        | 3,21E-05           | 0,729302        |
| 14-3-3 protein beta/alpha;14-3-3 protein beta/alpha, N-terminally processed       | Ywhab         | 0,00225476         | 0,730512        |
| <b>Protein deglycase DJ-1</b>                                                     | <b>Park7</b>  | <b>0,000865152</b> | <b>0,733671</b> |
| Septin-2                                                                          | septin2       | 0,0212672          | 0,774709        |
| Succinate dehydrogenase [ubiquinone] iron-sulfur subunit, mitochondrial           | Sdhb          | 0,0357843          | 0,774997        |
| ATP synthase subunit O, mitochondrial                                             | Atp5o         | 0,00314901         | 0,797715        |
| Up-regulated during skeletal muscle growth protein 5                              | Usmg5         | 0,0397152          | 0,809934        |
|                                                                                   | Inpp5a        | 0,0253914          | 0,811742        |
| Beta-centractin                                                                   | Actr1b        | 0,00342579         | 0,825498        |
| Cyclin-Y                                                                          | Ceny          | 0,00121568         | 0,86048         |
| Brain acid soluble protein 1                                                      | Baspl         | 0,00526843         | 0,865791        |
| Inorganic pyrophosphatase                                                         | Ppa1          | 0,00916029         | 0,869925        |
| Alpha-1-antitrypsin 1-5                                                           | Serpina1e     | 3,73E-07           | 0,876827        |
| Aspartyl aminopeptidase                                                           | Dnpep         | 0,0363321          | 0,883718        |
| Activator of 90 kDa heat shock protein ATPase homolog 1                           | Ahsa1         | 0,0124826          | 0,949377        |
| Cysteine and glycine-rich protein 1                                               | Csrp1         | 0,0210094          | 1,06391         |
| V-type proton ATPase subunit G 2                                                  | Atp6v1g2      | 0,000442645        | 1,26971         |
| Complexin-2                                                                       | Cplx2         | 0,00487043         | 1,38436         |
| Hemoglobin subunit alpha                                                          | Hba           | 7,31E-06           | 1,39752         |
| Myc box-dependent-interacting protein 1                                           | Bin1          | 0,00595215         | 1,70645         |
| Cytochrome c oxidase subunit 7C, mitochondrial                                    | Cox7c         | 0,00426945         | 2,10618         |

# SUPPLEMENTARY DATA

**Supplementary Table 4B.** WT-PFF vs WT-PBS,  $p < 0.05, FC > 1.2$  ( $\log_2 FC > 0.263$  or  $< -0.263$ ).

| T: Protein names                                                                                              | T: Gene names | p-value     | N: Student's T-test Difference<br>WT_PFF_WT_PBS |
|---------------------------------------------------------------------------------------------------------------|---------------|-------------|-------------------------------------------------|
| FXYP domain-containing ion transport regulator 6                                                              | Fxyd6         | 9,54E-06    | -1,49151                                        |
| V-type proton ATPase 16 kDa proteolipid subunit                                                               | Atp6v0c       | 0,0187788   | -1,36233                                        |
| Vitamin K epoxide reductase complex subunit 1-like protein 1                                                  | Vkorc111      | 0,0371741   | -1,27503                                        |
| Leukocyte surface antigen CD47                                                                                | Cd47          | 0,0415083   | -1,27032                                        |
| Calcium/calmodulin-dependent protein kinase type II subunit delta                                             | Camk2d        | 0,0105429   | -1,01205                                        |
| ES1 protein homolog, mitochondrial                                                                            | D10Jhu81e     | 0,0445597   | -1,00389                                        |
| Activated RNA polymerase II transcriptional coactivator p15                                                   | Sub1          | 0,0115368   | -0,989217                                       |
| Prostaglandin E synthase 3                                                                                    | Ptges3        | 0,014796    | -0,94448                                        |
| Synaptic vesicle glycoprotein 2B                                                                              | Sv2b          | 4,01E-05    | -0,878362                                       |
| ER lumen protein-retaining receptor 1                                                                         | Kdelr1        | 0,029555    | -0,875156                                       |
| Synaptic vesicle glycoprotein 2C                                                                              | Sv2c          | 0,000400792 | -0,872033                                       |
| Synaptophysin                                                                                                 | Syp           | 0,0425388   | -0,810893                                       |
| Cytochrome c oxidase subunit 1                                                                                | Mtco1         | 0,0287111   | -0,756265                                       |
| Synaptogyrin-3                                                                                                | Syng3         | 0,0193059   | -0,74211                                        |
| Translocon-associated protein subunit alpha                                                                   | Ssr1          | 0,00318869  | -0,703674                                       |
| Ras-related protein Rab-35                                                                                    | Rab35         | 0,0197242   | -0,671762                                       |
| Sodium-dependent proline transporter                                                                          | Slc6a7        | 0,0405211   | -0,661181                                       |
| Transmembrane protein 9B                                                                                      | Tmem9b        | 0,00516143  | -0,643358                                       |
| Lysophospholipid acyltransferase 7                                                                            | Mboat7        | 0,00411008  | -0,638856                                       |
| Tetraspanin-14                                                                                                | Tspan14       | 0,0439249   | -0,631043                                       |
| Protein-serine O-palmitoleoyltransferase porcupine                                                            | Porcn         | 0,000408832 | -0,623231                                       |
| EGF-like repeat and discoidin I-like domain-containing protein 3                                              | Edil3         | 0,0162579   | -0,602658                                       |
| CD82 antigen                                                                                                  | Cd82          | 3,88E-05    | -0,600763                                       |
| Synaptic vesicle glycoprotein 2A                                                                              | Sv2a          | 3,40E-05    | -0,599348                                       |
| Wolframin                                                                                                     | Wfs1          | 0,0108699   | -0,588158                                       |
| Proton myo-inositol cotransporter                                                                             | Slc2a13       | 0,000310516 | -0,585425                                       |
| Vesicular inhibitory amino acid transporter                                                                   | Slc32a1       | 0,000181915 | -0,578771                                       |
| Minor histocompatibility antigen H13                                                                          | Hm13          | 0,0369369   | -0,574092                                       |
| Calpain-2 catalytic subunit                                                                                   | Capn2         | 0,0232283   | -0,546404                                       |
| Hyaluronan and proteoglycan link protein 1                                                                    | Hapln1        | 0,000185541 | -0,541986                                       |
| Heterogeneous nuclear ribonucleoprotein A1;Heterogeneous nuclear ribonucleoprotein A1, N-terminally processed | Hnrnpa1       | 0,0327911   | -0,533033                                       |
| Synaptoporin                                                                                                  | Synpr         | 0,00204681  | -0,530895                                       |
| CD81 antigen                                                                                                  | Cd81          | 0,000199642 | -0,524076                                       |
| F-box only protein 2                                                                                          | Fbxo2         | 1,95E-06    | -0,522158                                       |

## SUPPLEMENTARY DATA

|                                                                                                                                                      |             |             |           |
|------------------------------------------------------------------------------------------------------------------------------------------------------|-------------|-------------|-----------|
| Phosphatidate cytidyltransferase 2                                                                                                                   | Cds2        | 0,00452057  | -0,521939 |
| Versican core protein                                                                                                                                | Vcan        | 2,17E-05    | -0,515589 |
| Peptidyl-glycine alpha-amidating monooxygenase;Peptidylglycine alpha-hydroxylating monooxygenase;Peptidyl-alpha-hydroxyglycine alpha-amidating lyase | Pam         | 0,013519    | -0,509539 |
| Reticulon-3                                                                                                                                          | Rtn3        | 0,0239601   | -0,500438 |
| Vesicular integral-membrane protein VIP36                                                                                                            | Lman2       | 0,000459893 | -0,495477 |
| Vesicle-associated membrane protein 2;Vesicle-associated membrane protein 3                                                                          | Vamp2;Vamp3 | 0,0014504   | -0,482781 |
| Myelin proteolipid protein                                                                                                                           | Plp1        | 0,00161421  | -0,476665 |
| Testican-2                                                                                                                                           | Spock2      | 0,000187286 | -0,466429 |
| Lysosome-associated membrane glycoprotein 1                                                                                                          | Lamp1       | 0,00185689  | -0,455204 |
| Sodium- and chloride-dependent GABA transporter 3                                                                                                    | Slc6a11     | 0,000748835 | -0,449916 |
| Vesicle-associated membrane protein 1                                                                                                                | Vamp1       | 0,000558004 | -0,437785 |
| Solute carrier family 2, facilitated glucose transporter member 1                                                                                    | Slc2a1      | 0,0320502   | -0,434549 |
| Lipid phosphate phosphohydrolase 3                                                                                                                   | Ppap2b      | 0,00200251  | -0,43239  |
| Nucleobindin-2;Nesfatin-1                                                                                                                            | Nucb2       | 0,0438185   | -0,431645 |
| Vesicular glutamate transporter 2                                                                                                                    | Slc17a6     | 0,000167767 | -0,430577 |
| Protein canopy homolog 2                                                                                                                             | Cnpy2       | 0,00200873  | -0,43     |
| Choline transporter-like protein 1                                                                                                                   | Slc44a1     | 0,000247457 | -0,429364 |
| Vesicular glutamate transporter 1                                                                                                                    | Slc17a7     | 0,000537312 | -0,429029 |
| Receptor-type tyrosine-protein phosphatase eta                                                                                                       | Ptprj       | 0,0357804   | -0,418557 |
| Cell cycle control protein 50A                                                                                                                       | Tmem30a     | 0,00181081  | -0,416028 |
| Large neutral amino acids transporter small subunit 2                                                                                                | Slc7a8      | 0,00138121  | -0,414866 |
| Protein kinase C beta type                                                                                                                           | Prkcb       | 0,00617344  | -0,411249 |
| Major prion protein                                                                                                                                  | Prnp        | 0,0287849   | -0,408547 |
| Phospholipid hydroperoxide glutathione peroxidase, mitochondrial                                                                                     | Gpx4        | 0,000120633 | -0,397795 |
| Cathepsin B;Cathepsin B light chain;Cathepsin B heavy chain                                                                                          | Ctsb        | 0,0272632   | -0,393795 |
| Sodium- and chloride-dependent GABA transporter 1                                                                                                    | Slc6a1      | 0,00141876  | -0,389411 |
| Leukocyte surface antigen CD47                                                                                                                       | Cd47        | 0,0299456   | -0,386457 |
| Mammalian ependymin-related protein 1                                                                                                                | Epdr1       | 0,0319671   | -0,380023 |
| Choline transporter-like protein 2                                                                                                                   | Slc44a2     | 0,00158766  | -0,377591 |
| Zinc transporter 7                                                                                                                                   | Slc30a7     | 0,0380496   | -0,373542 |
| 1-acyl-sn-glycerol-3-phosphate acyltransferase gamma                                                                                                 | Agpat3      | 0,000166675 | -0,372851 |
| RasGAP-activating-like protein 1                                                                                                                     | Rasal1      | 0,0147433   | -0,365455 |
| Sortilin                                                                                                                                             | Sort1       | 0,0435849   | -0,365001 |
| Calsyntenin-1;Soluble Alc-alpha;CTF1-alpha                                                                                                           | Clstn1      | 0,0139328   | -0,357298 |
| Myelin-oligodendrocyte glycoprotein                                                                                                                  | Mog         | 0,00449075  | -0,354827 |
| NADH-ubiquinone oxidoreductase chain 4                                                                                                               | Mtnd4       | 0,0481246   | -0,352002 |
| Protein ERGIC-53                                                                                                                                     | Lman1       | 0,00613756  | -0,351348 |

## SUPPLEMENTARY DATA

|                                                                |             |                  |                  |
|----------------------------------------------------------------|-------------|------------------|------------------|
| Cation-dependent mannose-6-phosphate receptor                  | M6pr        | 0,0399084        | -0,351323        |
| LMBR1 domain-containing protein 2                              | Lmbrd2      | 0,0178484        | -0,348872        |
| Sodium/calcium exchanger 1                                     | Slc8a1      | 0,0120078        | -0,347932        |
| Calnexin                                                       | Canx        | 0,00272656       | -0,339254        |
| Synaptotagmin-6                                                | Syt6        | 0,00625574       | -0,338711        |
| Adipocyte plasma membrane-associated protein                   | Apmap       | 0,0014907        | -0,327901        |
| Glycerophosphodiester phosphodiesterase 1                      | Gde1        | 8,94E-05         | -0,326875        |
| <b>Complement C1q subcomponent subunit B</b>                   | <b>C1qb</b> | <b>0,0458818</b> | <b>-0,324519</b> |
| Neurocan core protein                                          | Ncan        | 0,0259454        | -0,323012        |
| Coactosin-like protein                                         | Cotl1       | 0,0135496        | -0,313434        |
| Seizure 6-like protein                                         | Sez6l       | 0,0059714        | -0,312532        |
| Fatty aldehyde dehydrogenase                                   | Aldh3a2     | 0,000715107      | -0,310583        |
| NADH-ubiquinone oxidoreductase chain 5                         | Mtnd5       | 0,0480591        | -0,307791        |
| Histone deacetylase 11                                         | Hdac11      | 0,0392313        | -0,304612        |
| Reticulon-1                                                    | Rtn1        | 0,0362946        | -0,300543        |
| Phosphatidylinositol transfer protein alpha isoform            | Pitpna      | 0,0259323        | -0,300199        |
| BDNF/NT-3 growth factors receptor                              | Ntrk2       | 0,0116264        | -0,298212        |
| Calreticulin                                                   | Calr        | 2,02E-06         | -0,297306        |
| Transforming protein RhoA;Rho-related GTP-binding protein RhoC | Rhoa;Rhoc   | 0,00145806       | -0,296901        |
| OX-2 membrane glycoprotein                                     | Cd200       | 0,0129486        | -0,296732        |
| Receptor-type tyrosine-protein phosphatase zeta                | Ptprz1      | 0,00913895       | -0,295259        |
| Electrogenic sodium bicarbonate cotransporter 1                | Slc4a4      | 0,00696435       | -0,294361        |
| Metallo-beta-lactamase domain-containing protein 2             | Mblac2      | 0,00256795       | -0,289748        |
| Superoxide dismutase [Cu-Zn]                                   | Sod1        | 0,000958982      | -0,28261         |
| Sodium-driven chloride bicarbonate exchanger                   | Slc4a10     | 0,0210161        | -0,280824        |
| VIP36-like protein                                             | Lman2l      | 0,0404633        | -0,280123        |
| Sodium-dependent neutral amino acid transporter SLC6A17        | Slc6a17     | 0,00634699       | -0,279623        |
| LDLR chaperone MESD                                            | Mesdc2      | 0,000633798      | -0,276967        |
| Malectin                                                       | Mlec        | 0,0420262        | -0,276619        |
| Neuroplastin                                                   | Nptn        | 0,000833853      | -0,273702        |
| Transmembrane anterior posterior transformation protein 1      | Tapt1       | 0,000952583      | -0,269638        |
| Serotransferrin                                                | Tf          | 0,000925889      | -0,268287        |
| Translocon-associated protein subunit delta                    | Ssr4        | 0,000925914      | -0,265836        |
| Pyridoxal phosphate phosphatase                                | Pdyp        | 0,0221705        | 0,264516         |
| V-type proton ATPase subunit B, brain isoform                  | Atp6v1b2    | 0,0430248        | 0,264796         |
| Glutamine synthetase                                           | Glul        | 0,0139078        | 0,2688           |
| Dihydropyrimidinase-related protein 1                          | Crmp1       | 0,0434174        | 0,272341         |
| Succinate-semialdehyde dehydrogenase, mitochondrial            | Aldh5a1     | 0,0351954        | 0,276262         |



## SUPPLEMENTARY DATA

|                                                                                          |             |             |          |
|------------------------------------------------------------------------------------------|-------------|-------------|----------|
| Serum albumin                                                                            | Alb         | 0,0266473   | 0,278005 |
| Ankyrin-2                                                                                | Ank2        | 0,0310507   | 0,280763 |
| Neuronal-specific septin-3                                                               | septin3     | 0,0258174   | 0,283168 |
| Leucine-rich repeat LGI family member 3                                                  | Lgi3        | 0,0440521   | 0,292939 |
| Ectonucleoside triphosphate diphosphohydrolase 2                                         | Entpd2      | 0,043532    | 0,299003 |
| Neurochondrin                                                                            | Ncdn        | 0,0363669   | 0,29937  |
| Plastin-3                                                                                | Pls3        | 0,000758252 | 0,300234 |
| Cytochrome c oxidase subunit 5A, mitochondrial                                           | Cox5a       | 0,0409579   | 0,302832 |
| Calcium-dependent secretion activator 1                                                  | Cadps       | 0,00420131  | 0,30807  |
| Protein phosphatase 1 regulatory subunit 7                                               | Ppp1r7      | 0,00695303  | 0,308827 |
| GTP-binding nuclear protein Ran;GTP-binding nuclear protein Ran, testis-specific isoform | Ran;Rasl2-9 | 0,00314378  | 0,309265 |
| Transgelin-3                                                                             | Tagln3      | 0,0201966   | 0,310323 |
| Serine/threonine-protein kinase PAK 1                                                    | Pak1        | 0,0143686   | 0,310904 |
| T-complex protein 1 subunit alpha                                                        | Tcp1        | 0,00218294  | 0,312593 |
| Gamma-enolase                                                                            | Eno2        | 0,00238598  | 0,312814 |
| Glucose-6-phosphate isomerase                                                            | Gpi         | 0,00150873  | 0,327198 |
| LanC-like protein 2                                                                      | Lancl2      | 0,0413219   | 0,338553 |
| Septin-11                                                                                | Septin 11   | 0,0037634   | 0,339436 |
| Stress-70 protein, mitochondrial                                                         | Hspa9       | 0,0189987   | 0,340007 |
| Receptor-type tyrosine-protein phosphatase alpha                                         | Ptptra      | 0,0149543   | 0,345342 |
| Annexin A7                                                                               | Anxa7       | 4,33E-07    | 0,345957 |
| Adenylate kinase isoenzyme 1                                                             | Ak1         | 0,04342     | 0,350232 |
| L-lactate dehydrogenase B chain                                                          | Ldhb        | 0,0171563   | 0,351408 |
| Microtubule-associated protein 1A;MAP1A heavy chain;MAP1 light chain LC2                 | Map1a       | 0,00378644  | 0,352457 |
| Sepiapterin reductase                                                                    | Spr         | 0,0172131   | 0,352652 |
| Syntaxin-binding protein 1                                                               | Stxbp1      | 0,000135837 | 0,354962 |
| Malate dehydrogenase, mitochondrial                                                      | Mdh2        | 0,00934282  | 0,355384 |
| Heat shock cognate 71 kDa protein                                                        | Hspa8       | 0,00104647  | 0,368092 |
| Glucose 1,6-bisphosphate synthase                                                        | Pgm2l1      | 0,00782415  | 0,368603 |
| Adenylyl cyclase-associated protein 2                                                    | Cap2        | 0,000102191 | 0,371693 |
| Dynamin-1-like protein                                                                   | Dnm1l       | 0,00287795  | 0,372199 |
| Asparagine--tRNA ligase, cytoplasmic                                                     | Nars        | 0,0158695   | 0,374424 |
| Peripheral plasma membrane protein CASK                                                  | Cask        | 0,00434089  | 0,376783 |
| Ferritin light chain 1;Ferritin light chain 2                                            | Ftl1;Ftl2   | 0,00836573  | 0,377582 |
| Protein NDRG3                                                                            | Ndr3        | 0,00117687  | 0,382596 |
| Calbindin                                                                                | Calb1       | 0,0457353   | 0,388447 |
| AP-2 complex subunit alpha-1                                                             | Ap2a1       | 0,00611205  | 0,389236 |
| NAD-dependent protein deacetylase sirtuin-2                                              | Sirt2       | 0,000327368 | 0,390787 |
| Clathrin heavy chain 1                                                                   | Cltc        | 0,000961608 | 0,393729 |

# SUPPLEMENTARY DATA

|                                                                                                                                                                                                                                                                                                                                 |             |                    |                 |
|---------------------------------------------------------------------------------------------------------------------------------------------------------------------------------------------------------------------------------------------------------------------------------------------------------------------------------|-------------|--------------------|-----------------|
| Sideroflexin-1                                                                                                                                                                                                                                                                                                                  | Sfxn1       | 0,0427279          | 0,394024        |
| Fatty acid synthase:[Acyl-carrier-protein] S-acetyltransferase:[Acyl-carrier-protein] S-malonyltransferase;3-oxoacyl-[acyl-carrier-protein] synthase;3-oxoacyl-[acyl-carrier-protein] reductase;3-hydroxyacyl-[acyl-carrier-protein] dehydratase;Enoyl-[acyl-carrier-protein] reductase;Oleoyl-[acyl-carrier-protein] hydrolase | Fasn        | 0,0275734          | 0,394264        |
| Actin-related protein 2/3 complex subunit 4                                                                                                                                                                                                                                                                                     | Arpc4       | 0,0104574          | 0,39585         |
| Oligodendrocyte-myelin glycoprotein                                                                                                                                                                                                                                                                                             | Omg         | 0,00309066         | 0,396282        |
| V-type proton ATPase subunit H                                                                                                                                                                                                                                                                                                  | Atp6v1h     | 0,000170326        | 0,396813        |
| Spectrin alpha chain, non-erythrocytic 1                                                                                                                                                                                                                                                                                        | Sptan1      | 0,000751801        | 0,398356        |
| EF-hand domain-containing protein D2                                                                                                                                                                                                                                                                                            | Efh2        | 0,0131318          | 0,400243        |
| Cullin-associated NEDD8-dissociated protein 1                                                                                                                                                                                                                                                                                   | Cand1       | 8,31E-06           | 0,401598        |
| Nucleoside diphosphate kinase A                                                                                                                                                                                                                                                                                                 | Nme1        | 0,000317849        | 0,404543        |
| Actin-related protein 3                                                                                                                                                                                                                                                                                                         | Actr3       | 0,000499882        | 0,404721        |
| Sideroflexin-3                                                                                                                                                                                                                                                                                                                  | Sfxn3       | 0,0154109          | 0,406693        |
| Creatine kinase B-type                                                                                                                                                                                                                                                                                                          | Ckb         | 0,00727274         | 0,411031        |
| Calcium/calmodulin-dependent 3,5-cyclic nucleotide phosphodiesterase 1B                                                                                                                                                                                                                                                         | Pde1b       | 0,0447582          | 0,411787        |
| 14-3-3 protein gamma;14-3-3 protein gamma, N-terminally processed                                                                                                                                                                                                                                                               | Ywhag       | 0,0324066          | 0,41542         |
| 14-3-3 protein zeta/delta                                                                                                                                                                                                                                                                                                       | Ywhaz       | 0,0151828          | 0,41671         |
| Protein FAM49B                                                                                                                                                                                                                                                                                                                  | Fam49b      | 0,023702           | 0,417568        |
| Endophilin-A1                                                                                                                                                                                                                                                                                                                   | Sh3gl2      | 4,92E-05           | 0,418188        |
| Adenosylhomocysteinase                                                                                                                                                                                                                                                                                                          | Ahcy        | 0,00198116         | 0,420219        |
| N(G),N(G)-dimethylarginine dimethylaminohydrolase 1                                                                                                                                                                                                                                                                             | Ddah1       | 7,19E-05           | 0,420595        |
| Glycolipid transfer protein                                                                                                                                                                                                                                                                                                     | Gltf        | 0,0120891          | 0,425322        |
| Dynamin-1                                                                                                                                                                                                                                                                                                                       | Dnm1        | 2,54E-05           | 0,426923        |
| Isoaspartyl peptidase/L-asparaginase;Isoaspartyl peptidase/L-asparaginase alpha chain;Isoaspartyl peptidase/L-asparaginase beta chain                                                                                                                                                                                           | Asrg1       | 0,00637641         | 0,428198        |
| Heat shock protein 105 kDa                                                                                                                                                                                                                                                                                                      | Hsph1       | 0,000384299        | 0,430151        |
| Cytoskeleton-associated protein 4                                                                                                                                                                                                                                                                                               | Ckap4       | 0,0121184          | 0,431569        |
| Phosphoglucomutase-1                                                                                                                                                                                                                                                                                                            | Pgm1        | 0,00847452         | 0,439041        |
| ADP/ATP translocase 1                                                                                                                                                                                                                                                                                                           | Slc25a4     | 0,00205245         | 0,43944         |
| Dynactin subunit 1                                                                                                                                                                                                                                                                                                              | Dctn1       | 0,0440181          | 0,441881        |
| <b>Dihydropteridine reductase</b>                                                                                                                                                                                                                                                                                               | <b>Qdpr</b> | <b>0,000694842</b> | <b>0,446637</b> |
| 14-3-3 protein epsilon                                                                                                                                                                                                                                                                                                          | Ywhae       | 0,00515894         | 0,448738        |
| T-complex protein 1 subunit delta                                                                                                                                                                                                                                                                                               | Cct4        | 0,000780786        | 0,450316        |
| Beta-soluble NSF attachment protein                                                                                                                                                                                                                                                                                             | Napb        | 2,63E-05           | 0,452127        |
| Cytochrome b-c1 complex subunit 7                                                                                                                                                                                                                                                                                               | Uqcrb       | 0,0169594          | 0,453009        |
| Oxygen-dependent coproporphyrinogen-III oxidase, mitochondrial                                                                                                                                                                                                                                                                  | Cpox        | 0,044947           | 0,45466         |
|                                                                                                                                                                                                                                                                                                                                 | Pi4ka       | 0,0219533          | 0,464752        |

# SUPPLEMENTARY DATA

|                                                                                   |                     |                    |                 |
|-----------------------------------------------------------------------------------|---------------------|--------------------|-----------------|
| Transitional endoplasmic reticulum ATPase                                         | Vcp                 | 0,00243508         | 0,464807        |
| AP-3 complex subunit beta-2                                                       | Ap3b2               | 0,0256224          | 0,469591        |
| Proteasome subunit alpha type-7                                                   | Psma7               | 0,00191513         | 0,469615        |
| Citrate synthase, mitochondrial                                                   | Cs                  | 2,21E-06           | 0,471481        |
| Protein-L-isoaspartate(D-aspartate) O-methyltransferase                           | Pcmt1               | 0,00459129         | 0,472147        |
| Calcium-activated potassium channel subunit alpha-1                               | Kcnma1              | 0,009918           | 0,480657        |
| Septin-7                                                                          | Septin7             | 8,56E-05           | 0,481258        |
| ATP-citrate synthase                                                              | Acly                | 0,000246838        | 0,48161         |
| Aldose reductase                                                                  | Akr1b1              | 0,0113542          | 0,485765        |
| T-complex protein 1 subunit gamma                                                 | Cct3                | 0,000168866        | 0,48621         |
| Alpha-1-antitrypsin 1-3;Alpha-1-antitrypsin 1-1                                   | Serpina1c;Serpina1a | 5,54E-05           | 0,491736        |
| Myotrophin                                                                        | Mtpn                | 0,0177333          | 0,491884        |
| Protein disulfide-isomerase A6                                                    | Pdia6               | 4,07E-05           | 0,496739        |
| Cytoplasmic dynein 1 heavy chain 1                                                | Dync1h1             | 0,0001423          | 0,50266         |
| Serine/threonine-protein phosphatase 2A 65 kDa regulatory subunit A alpha isoform | Ppp2r1a             | 4,13E-06           | 0,50769         |
| Actin, cytoplasmic 2;Actin, cytoplasmic 2, N-terminally processed                 | Actg1               | 3,90E-05           | 0,50885         |
| Peroxisome oxidoreductin-5, mitochondrial                                         | Prdx5               | 1,51E-05           | 0,510156        |
| Serine/threonine-protein phosphatase 2A activator                                 | Ppp2r4              | 0,0119225          | 0,511246        |
| Coronin-1C                                                                        | Coro1c              | 0,0423629          | 0,514247        |
| ATP synthase subunit d, mitochondrial                                             | Atp5h               | 0,00139212         | 0,515256        |
| ATP synthase subunit gamma, mitochondrial                                         | Atp5c1              | 0,0103822          | 0,516166        |
| 14-3-3 protein eta                                                                | Ywhah               | 0,000779527        | 0,517593        |
| NADH dehydrogenase [ubiquinone] iron-sulfur protein 3, mitochondrial              | Ndufs3              | 0,0365672          | 0,520595        |
| Heterogeneous nuclear ribonucleoprotein K                                         | Hnrnpk              | 0,0064026          | 0,526251        |
| L-lactate dehydrogenase A chain                                                   | Ldha                | 0,0172894          | 0,5272          |
| Peroxisome oxidoreductin-6                                                        | Prdx6               | 0,00534494         | 0,532777        |
| NADH dehydrogenase [ubiquinone] 1 beta subcomplex subunit 4                       | Ndufb4              | 0,00128975         | 0,534693        |
| Flotillin-1                                                                       | Flot1               | 0,000834587        | 0,534844        |
| Stress-induced-phosphoprotein 1                                                   | Stip1               | 0,0017079          | 0,54071         |
| Endoplasmic reticulum resident protein 29                                         | Erp29               | 7,58E-05           | 0,545627        |
| Catenin beta-1                                                                    | Ctnnb1              | 0,000190861        | 0,547346        |
| Glyoxalase domain-containing protein 4                                            | Glod4               | 0,0238438          | 0,547575        |
| Heat shock 70 kDa protein 4                                                       | Hspa4               | 2,97E-05           | 0,561926        |
| V-type proton ATPase catalytic subunit A                                          | Atp6v1a             | 5,24E-06           | 0,562685        |
| <b>Phosphoglycerate kinase 1</b>                                                  | <b>Pgk1</b>         | <b>0,000207664</b> | <b>0,570183</b> |
| Ferritin heavy chain;Ferritin heavy chain, N-terminally processed                 | Fth1                | 0,000127678        | 0,574652        |
|                                                                                   | Rap1gds1            | 2,38E-05           | 0,575078        |
| Regulator of G-protein signaling 7                                                | Rgs7                | 2,02E-05           | 0,577662        |

# SUPPLEMENTARY DATA

|                                                                                   |                 |             |          |
|-----------------------------------------------------------------------------------|-----------------|-------------|----------|
| ATP synthase subunit alpha, mitochondrial                                         | Atp5a1          | 0,00424607  | 0,582673 |
| Microtubule-associated protein tau                                                | Mapt            | 1,65E-05    | 0,584386 |
| Spectrin beta chain, non-erythrocytic 1                                           | Sptbn1          | 9,08E-08    | 0,5845   |
| Leucine-rich repeat-containing protein 57                                         | Lrrc57          | 0,000560997 | 0,591595 |
| Serine/threonine-protein phosphatase 2B catalytic subunit alpha isoform           | Ppp3ca          | 2,26E-06    | 0,59394  |
| Carbonyl reductase [NADPH] 1                                                      | Cbr1            | 0,000795306 | 0,599431 |
| Alpha-synuclein                                                                   | Snca            | 0,0196293   | 0,607903 |
| Alpha-soluble NSF attachment protein                                              | Napa            | 4,50E-07    | 0,618211 |
| Hemoglobin subunit beta-1                                                         | Hbb-b1          | 4,79E-05    | 0,622062 |
| Septin-6                                                                          | septin6         | 0,0362116   | 0,628115 |
| V-type proton ATPase subunit C 1                                                  | Atp6v1c1        | 1,67E-05    | 0,628165 |
| Retinal dehydrogenase 1;Aldehyde dehydrogenase, cytosolic 1                       | Aldh1a1;Aldh1a7 | 0,0130772   | 0,636948 |
| Adenylosuccinate synthetase isozyme 2                                             | Adss            | 0,0148927   | 0,638455 |
| Phosphoserine aminotransferase                                                    | Psat1           | 0,000318779 | 0,650101 |
| Gamma-soluble NSF attachment protein                                              | Napg            | 0,000200101 | 0,651157 |
| Serine-threonine kinase receptor-associated protein                               | Strap           | 0,035619    | 0,654308 |
| Regulator of G-protein signaling 6                                                | Rgs6            | 0,0141693   | 0,654316 |
| Syntaxin-binding protein 5                                                        | Stxbp5          | 0,00147625  | 0,668075 |
| Costars family protein ABRACL                                                     | Abrac1          | 0,0465521   | 0,687604 |
| Mitochondrial import inner membrane translocase subunit Tim13                     | Timm13          | 0,0228607   | 0,690147 |
| ATP synthase subunit beta, mitochondrial                                          | Atp5b           | 0,000229986 | 0,693999 |
| NADH-ubiquinone oxidoreductase 75 kDa subunit, mitochondrial                      | Ndufs1          | 0,000750706 | 0,697835 |
| Protein phosphatase methylesterase 1                                              | Ppme1           | 0,00277136  | 0,703677 |
| Protein lin-7 homolog A                                                           | Lin7a           | 5,44E-08    | 0,70903  |
| Septin-5                                                                          | Septin7         | 0,00766679  | 0,710393 |
| CDP-diacylglycerol--glycerol-3-phosphate 3-phosphatidyltransferase, mitochondrial | Pgs1            | 0,0206099   | 0,711467 |
| DnaJ homolog subfamily C member 10                                                | Dnajc10         | 0,0278923   | 0,71899  |
|                                                                                   | Ttc7b           | 0,00255409  | 0,723217 |
| Heat shock 70 kDa protein 4L                                                      | Hspa4l          | 3,21E-05    | 0,729302 |
| 14-3-3 protein beta/alpha;14-3-3 protein beta/alpha, N-terminally processed       | Ywhab           | 0,00225476  | 0,730512 |
| Protein deglycase DJ-1                                                            | Park7           | 0,000865152 | 0,733671 |
| Septin-2                                                                          | septin2         | 0,0212672   | 0,774709 |
| Succinate dehydrogenase [ubiquinone] iron-sulfur subunit, mitochondrial           | Sdhb            | 0,0357843   | 0,774997 |
| ATP synthase subunit O, mitochondrial                                             | Atp5o           | 0,00314901  | 0,797715 |
| Up-regulated during skeletal muscle growth protein 5                              | Usmg5           | 0,0397152   | 0,809934 |
|                                                                                   | Inpp5a          | 0,0253914   | 0,811742 |
| Beta-centractin                                                                   | Actr1b          | 0,00342579  | 0,825498 |
| Cyclin-Y                                                                          | Ccny            | 0,00121568  | 0,86048  |

## SUPPLEMENTARY DATA

|                                                         |           |             |          |
|---------------------------------------------------------|-----------|-------------|----------|
| Brain acid soluble protein 1                            | Baspl     | 0,00526843  | 0,865791 |
| Inorganic pyrophosphatase                               | Ppa1      | 0,00916029  | 0,869925 |
| Alpha-1-antitrypsin 1-5                                 | Serpina1e | 3,73E-07    | 0,876827 |
| Aspartyl aminopeptidase                                 | Dnpep     | 0,0363321   | 0,883718 |
| Activator of 90 kDa heat shock protein ATPase homolog 1 | Ahsa1     | 0,0124826   | 0,949377 |
| Cysteine and glycine-rich protein 1                     | Csrp1     | 0,0210094   | 1,06391  |
| V-type proton ATPase subunit G 2                        | Atp6v1g2  | 0,000442645 | 1,26971  |
| Complexin-2                                             | Cplx2     | 0,00487043  | 1,38436  |
| Hemoglobin subunit alpha                                | Hba       | 7,31E-06    | 1,39752  |
| Myc box-dependent-interacting protein 1                 | Bin1      | 0,00595215  | 1,70645  |
| Cytochrome c oxidase subunit 7C, mitochondrial          | Cox7c     | 0,00426945  | 2,10618  |

**Supplementary Table 5A. KO-PFF vs KO-PBS, p<0.05.**

| <b>T: Protein names</b>                                                                                                   | <b>T: Gene names</b>    | <b>p-value</b> | <b>N: Student's T-test Difference<br/>KO_PFF_KO_PBS</b> |
|---------------------------------------------------------------------------------------------------------------------------|-------------------------|----------------|---------------------------------------------------------|
| Acyl-CoA-binding protein                                                                                                  | Dbi                     | 0,00817609     | -2,09456                                                |
| Guanine nucleotide-binding protein G(I)/G(S)/G(O) subunit gamma-3                                                         | Gng3                    | 0,00244823     | -1,91068                                                |
| Sodium bicarbonate cotransporter 3                                                                                        | Slc4a7                  | 0,0140806      | -1,56295                                                |
| Actin, alpha cardiac muscle 1;Actin, alpha skeletal muscle;Actin, aortic smooth muscle;Actin, gamma-enteric smooth muscle | Actc1;Acta1;Acta2;Actg2 | 0,0272533      | -1,55483                                                |
| Platelet-activating factor acetylhydrolase IB subunit beta                                                                | Pafah1b2                | 0,0338423      | -1,52741                                                |
| Histidine triad nucleotide-binding protein 1                                                                              | Hint1                   | 0,0171272      | -1,43318                                                |
| Importin subunit beta-1                                                                                                   | Kpnb1                   | 0,00039086     | -1,43178                                                |
| Astrocytic phosphoprotein PEA-15                                                                                          | Pea15                   | 0,0299752      | -1,34819                                                |
| Macrophage migration inhibitory factor                                                                                    | Mif                     | 1,48E-05       | -1,16353                                                |
| GTP-binding protein Rheb                                                                                                  | Rheb                    | 0,0108055      | -1,10672                                                |
| Protein-L-isoaspartate(D-aspartate) O-methyltransferase                                                                   | Pemt1                   | 3,01E-05       | -1,05985                                                |
| Complexin-2                                                                                                               | Cplx2                   | 0,0463788      | -1,0514                                                 |
| Inositol polyphosphate 1-phosphatase                                                                                      | Inpp1                   | 0,0018729      | -1,03296                                                |
| Protein NDRG2                                                                                                             | Ndrp2                   | 2,26E-05       | -1,0303                                                 |
| Coronin-1B                                                                                                                | Coro1b                  | 0,00529367     | -0,997421                                               |
| Cofilin-2                                                                                                                 | Cfl2                    | 0,00099888     | -0,951125                                               |
| ES1 protein homolog, mitochondrial                                                                                        | D10Jhu81e               | 0,0481777      | -0,943491                                               |
| Protein NDRG3                                                                                                             | Ndrp3                   | 0,00012264     | -0,942878                                               |
| Leucine-rich repeat-containing protein 57                                                                                 | Lrrc57                  | 0,00010475     | -0,935154                                               |
| Protein NipSnap homolog 1                                                                                                 | Nipsnap1                | 0,0164158      | -0,931698                                               |
| Ribonuclease UK114                                                                                                        | Hrsp12                  | 0,0280827      | -0,931002                                               |
| Serum paraoxonase/arylesterase 2                                                                                          | Pon2                    | 0,0173761      | -0,912513                                               |

## SUPPLEMENTARY DATA

|                                                                                             |             |            |           |
|---------------------------------------------------------------------------------------------|-------------|------------|-----------|
| Sodium-dependent dopamine transporter                                                       | Slc6a3      | 0,0440341  | -0,901412 |
| Sodium channel subunit beta-3                                                               | Scn3b       | 0,0449803  | -0,879667 |
| Leukotriene A-4 hydrolase                                                                   | Lta4h       | 0,0141554  | -0,877377 |
| Carbonyl reductase [NADPH] 1                                                                | Cbr1        | 2,33E-06   | -0,844957 |
| Neuroendocrine convertase 2                                                                 | Pcsk2       | 0,0293817  | -0,83938  |
| Cysteine and glycine-rich protein 1                                                         | Csrp1       | 0,0223411  | -0,837882 |
| Proteasome subunit alpha type-5                                                             | Psma5       | 0,0362792  | -0,836941 |
| Guanine nucleotide-binding protein G(olf) subunit alpha                                     | Gnal        | 0,0482619  | -0,828856 |
| Sepiapterin reductase                                                                       | Spr         | 0,00084869 | -0,818392 |
| Phosphoserine aminotransferase                                                              | Psat1       | 0,00048323 | -0,782838 |
| Cell division control protein 42 homolog                                                    | Cdc42       | 8,78E-05   | -0,771018 |
| CD9 antigen                                                                                 | Cd9         | 0,012934   | -0,74967  |
| D-3-phosphoglycerate dehydrogenase                                                          | Phgdh       | 0,00086742 | -0,745486 |
| Ras-related protein Rab-14                                                                  | Rab14       | 0,00699523 | -0,736525 |
| Neurochondrin                                                                               | Ncdn        | 0,00017128 | -0,727688 |
| Glyceraldehyde-3-phosphate dehydrogenase                                                    | Gapdh       | 0,00155551 | -0,718235 |
| Protein deglycase DJ-1                                                                      | Park7       | 0,00093718 | -0,691818 |
| Fatty acid-binding protein, heart                                                           | Fabp3       | 0,049605   | -0,687711 |
| Tubulin beta-3 chain                                                                        | Tubb3       | 0,00540736 | -0,679958 |
| Major prion protein                                                                         | Prnp        | 0,0271513  | -0,679542 |
| Myotrophin                                                                                  | Mtpn        | 0,00295595 | -0,677114 |
| Ras-related protein Rab-3C                                                                  | Rab3c       | 0,00166913 | -0,677108 |
| Cystatin-C                                                                                  | Cst3        | 0,00096186 | -0,675519 |
| Phosphatidylethanolamine-binding protein 1;Hippocampal cholinergic neurostimulating peptide | Pebp1       | 8,36E-07   | -0,67432  |
| GTP-binding nuclear protein Ran;GTP-binding nuclear protein Ran, testis-specific isoform    | Ran;Rasl2-9 | 0,0300006  | -0,671871 |
| Brain acid soluble protein 1                                                                | Basp1       | 0,00613399 | -0,66224  |
| Disintegrin and metalloproteinase domain-containing protein 11                              | Adam11      | 0,0243403  | -0,660918 |
| Glyoxylate reductase/hydroxypyruvate reductase                                              | Grhpr       | 0,00057559 | -0,652848 |
| L-lactate dehydrogenase A chain                                                             | Ldha        | 0,00015044 | -0,650262 |
| Neurologin-2                                                                                | Nlgn2       | 0,00180754 | -0,625692 |
| Syntaxin-binding protein 5-like                                                             | Stxbp5l     | 0,00704924 | -0,61817  |
| Glyoxalase domain-containing protein 4                                                      | Glod4       | 0,00013523 | -0,613326 |
| Flotillin-2                                                                                 | Flot2       | 2,26E-06   | -0,60818  |
| Serine/threonine-protein phosphatase 5                                                      | Ppp5c       | 0,0236876  | -0,606544 |
| Peroxiredoxin-6                                                                             | Prdx6       | 6,70E-07   | -0,605497 |
| Syntaxin-binding protein 5                                                                  | Stxbp5      | 0,00015339 | -0,599482 |
| Ras-related protein M-Ras                                                                   | Mras        | 0,0159464  | -0,598251 |
| Calcium/calmodulin-dependent 3,5-cyclic nucleotide phosphodiesterase 1B                     | Pde1b       | 0,0301852  | -0,597213 |
| Haloacid dehalogenase-like hydrolase domain-containing protein 2                            | Hdhd2       | 0,032443   | -0,591879 |

## SUPPLEMENTARY DATA

|                                                                                       |             |            |           |
|---------------------------------------------------------------------------------------|-------------|------------|-----------|
| Tubulin beta-4B chain                                                                 | Tubb4b      | 0,0017794  | -0,590352 |
| Tubulin beta-2A chain                                                                 | Tubb2a      | 0,015937   | -0,584839 |
| Dynamin-1-like protein                                                                | Dnm1l       | 0,00017378 | -0,584426 |
| Calcium-activated potassium channel subunit alpha-1                                   | Kcnma1      | 0,0208398  | -0,580834 |
| Septin-5                                                                              | Σεπ-05      | 0,0184016  | -0,577302 |
| Guanine nucleotide-binding protein G(I)/G(S)/G(T) subunit beta-2                      | Gnb2        | 0,0119167  | -0,576919 |
| ATP-dependent 6-phosphofructokinase, liver type                                       | Pfkl        | 0,00194578 | -0,576255 |
| Malate dehydrogenase, mitochondrial                                                   | Mdh2        | 0,00013134 | -0,57241  |
| Phosphoglycerate kinase 1                                                             | Pgk1        | 1,48E-08   | -0,556076 |
| Neuronal cell adhesion molecule                                                       | Nrcam       | 0,00156922 | -0,555821 |
| Ketimine reductase mu-crystallin                                                      | Crym        | 0,00019154 | -0,555447 |
| V-type proton ATPase subunit d 1                                                      | Atp6v0d1    | 0,0384586  | -0,553741 |
| Dihydropyrimidinase-related protein 1                                                 | Crmp1       | 0,0102016  | -0,54886  |
| Dual specificity mitogen-activated protein kinase kinase 1                            | Map2k1      | 0,028886   | -0,544706 |
| Phosphoglucomutase-1                                                                  | Pgm1        | 7,72E-06   | -0,54276  |
| 14-3-3 protein gamma;14-3-3 protein gamma, N-terminally processed                     | Ywhag       | 0,0166587  | -0,540637 |
| Rho-related GTP-binding protein RhoB                                                  | Rhob        | 0,00583397 | -0,537586 |
| Flotillin-1                                                                           | Flot1       | 3,29E-05   | -0,535885 |
| Solute carrier family 2, facilitated glucose transporter member 3                     | Slc2a3      | 0,0217972  | -0,534663 |
| Peptidyl-prolyl cis-trans isomerase FKBP1A                                            | Fkbp1a      | 0,0309809  | -0,532517 |
| Septin-6                                                                              | Σεπ-06      | 0,0105743  | -0,530615 |
| Fructose-bisphosphate aldolase A                                                      | Aldoa       | 3,87E-07   | -0,530046 |
| Acetyl-CoA acetyltransferase, mitochondrial                                           | Acat1       | 0,0002381  | -0,527613 |
| Fructose-bisphosphate aldolase C                                                      | Aldoc       | 4,06E-06   | -0,526711 |
| Prosaposin receptor GPR37L1                                                           | Gpr37l1     | 0,0313664  | -0,523607 |
| Ras-related protein Rab-5A                                                            | Rab5a       | 0,00219528 | -0,520837 |
| Ubiquitin carboxyl-terminal hydrolase isozyme L1                                      | Uchl1       | 0,00035186 | -0,510066 |
| Aldose reductase                                                                      | Akr1b1      | 0,0244747  | -0,507752 |
| AP-2 complex subunit alpha-1                                                          | Ap2a1       | 0,0242061  | -0,507577 |
| Neurologin-3                                                                          | Nlgn3       | 0,00796357 | -0,505842 |
| Tubulin alpha-4A chain                                                                | Tuba4a      | 0,00395975 | -0,505331 |
| Actin, cytoplasmic 2;Actin, cytoplasmic 2, N-terminally processed                     | Actg1       | 0,00146253 | -0,501407 |
| Lymphocyte antigen 6H                                                                 | Ly6h        | 0,0490953  | -0,501158 |
| Ras-related C3 botulinum toxin substrate 1;Ras-related C3 botulinum toxin substrate 2 | Rac1;Rac2   | 0,0208637  | -0,500521 |
| Ephrin type-A receptor 4                                                              | Epha4       | 5,76E-05   | -0,498359 |
| T-complex protein 1 subunit gamma                                                     | Cct3        | 0,00597445 | -0,49482  |
| Dihydropteridine reductase                                                            | Qdpr        | 0,0120558  | -0,49181  |
| Ras-related protein Rap-2a;Ras-related protein Rap-2c                                 | Rap2a;Rap2c | 0,00358804 | -0,490649 |

## SUPPLEMENTARY DATA

|                                                                                                                                                                                                                                                                                                                                 |                      |            |           |
|---------------------------------------------------------------------------------------------------------------------------------------------------------------------------------------------------------------------------------------------------------------------------------------------------------------------------------|----------------------|------------|-----------|
| cAMP-dependent protein kinase type II-beta regulatory subunit                                                                                                                                                                                                                                                                   | Prkar2b              | 0,0395885  | -0,489111 |
| 4-aminobutyrate aminotransferase, mitochondrial                                                                                                                                                                                                                                                                                 | Abat                 | 0,00011522 | -0,488835 |
| Glycerol-3-phosphate dehydrogenase 1-like protein                                                                                                                                                                                                                                                                               | Gpd1l                | 0,0336162  | -0,488586 |
| Thioredoxin                                                                                                                                                                                                                                                                                                                     | Txn                  | 0,0167098  | -0,476328 |
| Ubiquitin-like modifier-activating enzyme 1                                                                                                                                                                                                                                                                                     | Uba1                 | 0,00024045 | -0,47531  |
| T-complex protein 1 subunit delta                                                                                                                                                                                                                                                                                               | Cct4                 | 0,00645813 | -0,47463  |
| Gamma-aminobutyric acid receptor subunit beta-1                                                                                                                                                                                                                                                                                 | Gabrb1               | 0,00665247 | -0,47445  |
| Neuronal growth regulator 1                                                                                                                                                                                                                                                                                                     | Negr1                | 0,000211   | -0,47021  |
| Elongation factor 1-alpha 2                                                                                                                                                                                                                                                                                                     | Eef1a2               | 0,00478054 | -0,467722 |
| Serine/threonine-protein phosphatase PP1-beta catalytic subunit;Serine/threonine-protein phosphatase PP1-alpha catalytic subunit;Serine/threonine-protein phosphatase PP1-gamma catalytic subunit                                                                                                                               | Ppp1cb;Ppp1ca;Ppp1cc | 0,00015993 | -0,467268 |
| Ras-related protein Rab-7a                                                                                                                                                                                                                                                                                                      | Rab7a                | 0,00517159 | -0,464121 |
| Cofilin-1                                                                                                                                                                                                                                                                                                                       | Cfl1                 | 0,0477064  | -0,463641 |
| Fatty acid synthase;[Acyl-carrier-protein] S-acetyltransferase;[Acyl-carrier-protein] S-malonyltransferase;3-oxoacyl-[acyl-carrier-protein] synthase;3-oxoacyl-[acyl-carrier-protein] reductase;3-hydroxyacyl-[acyl-carrier-protein] dehydratase;Enoyl-[acyl-carrier-protein] reductase;Oleoyl-[acyl-carrier-protein] hydrolase | Fasn                 | 0,0427446  | -0,463297 |
| Sortilin                                                                                                                                                                                                                                                                                                                        | Sort1                | 0,0147674  | -0,45391  |
| Carbonic anhydrase 2                                                                                                                                                                                                                                                                                                            | Ca2                  | 0,00043591 | -0,452523 |
| V-type proton ATPase subunit B, brain isoform                                                                                                                                                                                                                                                                                   | Atp6v1b2             | 0,00198056 | -0,449637 |
| Peroxisome dismutase 5, mitochondrial                                                                                                                                                                                                                                                                                           | Prdx5                | 0,00131965 | -0,446826 |
| Vesicle-fusing ATPase                                                                                                                                                                                                                                                                                                           | Nsf                  | 0,00062561 | -0,446817 |
| Adenosylhomocysteinase                                                                                                                                                                                                                                                                                                          | Ahcy                 | 5,31E-05   | -0,443701 |
| Lactoylglutathione lyase                                                                                                                                                                                                                                                                                                        | Glo1                 | 0,0135791  | -0,443697 |
| Ras-related protein Rab-3A                                                                                                                                                                                                                                                                                                      | Rab3a                | 0,0304531  | -0,442746 |
| Isocitrate dehydrogenase [NADP] cytoplasmic                                                                                                                                                                                                                                                                                     | Idh1                 | 0,0095195  | -0,440855 |
| Ubiquitin-conjugating enzyme E2 variant 1;Ubiquitin-conjugating enzyme E2 variant 2                                                                                                                                                                                                                                             | Ube2v1;Ube2v2        | 0,0154793  | -0,430401 |
| LanC-like protein 1                                                                                                                                                                                                                                                                                                             | Lancl1               | 0,0125916  | -0,429955 |
| Beta-synuclein                                                                                                                                                                                                                                                                                                                  | Sncb                 | 0,0225067  | -0,427728 |
| Nucleoside diphosphate kinase A                                                                                                                                                                                                                                                                                                 | Nme1                 | 3,94E-05   | -0,427659 |
| Adenylate kinase isoenzyme 1                                                                                                                                                                                                                                                                                                    | Ak1                  | 0,0271057  | -0,426385 |
| Intercellular adhesion molecule 5                                                                                                                                                                                                                                                                                               | Icam5                | 0,0286459  | -0,426317 |
| Neurotrimin                                                                                                                                                                                                                                                                                                                     | Ntm                  | 0,00232226 | -0,42341  |
| Neurofascin                                                                                                                                                                                                                                                                                                                     | Nfasc                | 8,30E-05   | -0,423123 |
| Rab GDP dissociation inhibitor alpha                                                                                                                                                                                                                                                                                            | Gdi1                 | 5,03E-07   | -0,42267  |
| Coronin-1A                                                                                                                                                                                                                                                                                                                      | Coro1a               | 0,0238384  | -0,422566 |
| Serine/threonine-protein phosphatase 2B catalytic subunit alpha isoform                                                                                                                                                                                                                                                         | Ppp3ca               | 6,49E-06   | -0,418474 |



## SUPPLEMENTARY DATA

|                                                                                                                                                                                                                                                                     |          |            |           |
|---------------------------------------------------------------------------------------------------------------------------------------------------------------------------------------------------------------------------------------------------------------------|----------|------------|-----------|
| Tubulin alpha-1B chain                                                                                                                                                                                                                                              | Tuba1b   | 0,0090378  | -0,418199 |
| AP-2 complex subunit alpha-2                                                                                                                                                                                                                                        | Ap2a2    | 0,00012579 | -0,415173 |
| Calsyntenin-1;Soluble Alc-alpha;CTF1-alpha                                                                                                                                                                                                                          | Clstn1   | 0,0115235  | -0,412784 |
| ATP-citrate synthase                                                                                                                                                                                                                                                | Acly     | 0,00136721 | -0,411176 |
| Protein tweety homolog 1                                                                                                                                                                                                                                            | Ttyh1    | 0,047638   | -0,408899 |
| NAD-dependent protein deacetylase sirtuin-2                                                                                                                                                                                                                         | Sirt2    | 0,0130025  | -0,406427 |
| Glucose 1,6-bisphosphate synthase                                                                                                                                                                                                                                   | Pgm2l1   | 0,00045203 | -0,406136 |
| Dual specificity protein phosphatase 3                                                                                                                                                                                                                              | Dusp3    | 0,00749279 | -0,403811 |
| Immunoglobulin superfamily member 8                                                                                                                                                                                                                                 | Igsf8    | 0,0218314  | -0,398635 |
| Alcohol dehydrogenase class-3                                                                                                                                                                                                                                       | Adh5     | 0,0181444  | -0,394361 |
| Poly(rC)-binding protein 1                                                                                                                                                                                                                                          | Pcbp1    | 0,0337833  | -0,393804 |
| Citrate synthase, mitochondrial                                                                                                                                                                                                                                     | Cs       | 0,0268807  | -0,385009 |
| ER membrane protein complex subunit 1                                                                                                                                                                                                                               | Emc1     | 0,0315282  | -0,384979 |
| Isoaspartyl peptidase/L-asparaginase;Isoaspartyl peptidase/L-asparaginase alpha chain;Isoaspartyl peptidase/L-asparaginase beta chain                                                                                                                               | Asrgl1   | 0,00425301 | -0,383783 |
| Glutamate receptor ionotropic, NMDA 2A                                                                                                                                                                                                                              | Grin2a   | 0,0482563  | -0,382026 |
| Pro-low-density lipoprotein receptor-related protein 1;Low-density lipoprotein receptor-related protein 1 85 kDa subunit;Low-density lipoprotein receptor-related protein 1 515 kDa subunit;Low-density lipoprotein receptor-related protein 1 intracellular domain | Lrp1     | 5,79E-05   | -0,376531 |
| Protein KIAA1045                                                                                                                                                                                                                                                    | Kiaa1045 | 0,00250537 | -0,37543  |
| Neural cell adhesion molecule L1                                                                                                                                                                                                                                    | L1cam    | 0,0140013  | -0,374525 |
| Cell adhesion molecule 1                                                                                                                                                                                                                                            | Cadm1    | 0,00561133 | -0,373428 |
| Protein FAM49B                                                                                                                                                                                                                                                      | Fam49b   | 0,00052499 | -0,373423 |
| V-type proton ATPase catalytic subunit A                                                                                                                                                                                                                            | Atp6v1a  | 0,00011807 | -0,371904 |
| Aspartate aminotransferase, cytoplasmic                                                                                                                                                                                                                             | Got1     | 0,00253987 | -0,370361 |
| Heat shock cognate 71 kDa protein                                                                                                                                                                                                                                   | Hspa8    | 9,36E-05   | -0,368101 |
| Serine/threonine-protein phosphatase 2A catalytic subunit alpha isoform                                                                                                                                                                                             | Ppp2ca   | 1,66E-05   | -0,365635 |
| D-dopachrome decarboxylase                                                                                                                                                                                                                                          | Ddt      | 0,0156622  | -0,363324 |
| Cell adhesion molecule 4                                                                                                                                                                                                                                            | Cadm4    | 0,00287226 | -0,357646 |
| Serine-threonine kinase receptor-associated protein                                                                                                                                                                                                                 | Strap    | 0,0298398  | -0,35353  |
| Isocitrate dehydrogenase [NAD] subunit alpha, mitochondrial                                                                                                                                                                                                         | Idh3a    | 0,0248359  | -0,351014 |
| Coactosin-like protein                                                                                                                                                                                                                                              | Cotl1    | 0,0143664  | -0,350022 |
| Glycogen phosphorylase, brain form                                                                                                                                                                                                                                  | Pygb     | 0,0200512  | -0,348934 |
| Versican core protein                                                                                                                                                                                                                                               | Vcan     | 0,0080338  | -0,345983 |
| Metabotropic glutamate receptor 2                                                                                                                                                                                                                                   | Grm2     | 0,0221661  | -0,341079 |
| Seizure 6-like protein                                                                                                                                                                                                                                              | Sez6l    | 0,0295732  | -0,340528 |
| Guanine nucleotide-binding protein subunit alpha-11                                                                                                                                                                                                                 | Gna11    | 0,0001408  | -0,340195 |
| Clathrin heavy chain 1                                                                                                                                                                                                                                              | Cltc     | 0,00056118 | -0,335357 |
| Sphingomyelin phosphodiesterase 3                                                                                                                                                                                                                                   | Smpd3    | 0,00372672 | -0,334701 |

## SUPPLEMENTARY DATA

|                                                                                                                                                      |         |            |           |
|------------------------------------------------------------------------------------------------------------------------------------------------------|---------|------------|-----------|
| Cytosolic acyl coenzyme A thioester hydrolase                                                                                                        | Acot7   | 0,0410091  | -0,333623 |
| Transitional endoplasmic reticulum ATPase                                                                                                            | Vcp     | 2,53E-05   | -0,330465 |
| Adenylyl cyclase-associated protein 2                                                                                                                | Cap2    | 0,00021804 | -0,324674 |
| Leucine-rich repeat and immunoglobulin-like domain-containing nogo receptor-interacting protein 1                                                    | Lingo1  | 0,00509864 | -0,323042 |
| Aconitate hydratase, mitochondrial                                                                                                                   | Aco2    | 0,00363147 | -0,317393 |
| AP-2 complex subunit beta                                                                                                                            | Ap2b1   | 0,0346899  | -0,316829 |
| Ectonucleoside triphosphate diphosphohydrolase 2                                                                                                     | Entpd2  | 0,0308525  | -0,313722 |
| L-lactate dehydrogenase B chain                                                                                                                      | Ldhb    | 0,00065215 | -0,313295 |
| Syntaxin-binding protein 1                                                                                                                           | Stxbp1  | 0,00428081 | -0,312118 |
| Ubiquitin thioesterase OTUB1                                                                                                                         | Otub1   | 0,0408591  | -0,311559 |
| Cullin-associated NEDD8-dissociated protein 1                                                                                                        | Cand1   | 0,00184347 | -0,310369 |
| Heat shock 70 kDa protein 12A                                                                                                                        | Hspa12a | 0,0405681  | -0,299874 |
| Dynamin-1                                                                                                                                            | Dnm1    | 0,00113804 | -0,299489 |
| Actin-related protein 2/3 complex subunit 4                                                                                                          | Arpc4   | 0,0216264  | -0,29682  |
| Hematopoietic progenitor cell antigen CD34                                                                                                           | Cd34    | 0,00978274 | -0,293865 |
| Synaptic vesicle glycoprotein 2A                                                                                                                     | Sv2a    | 0,025674   | -0,293646 |
| Transketolase                                                                                                                                        | Tkt     | 0,0286508  | -0,293236 |
| Protein kinase C gamma type                                                                                                                          | Prkcg   | 0,0329119  | -0,289643 |
| Glutamine synthetase                                                                                                                                 | Glul    | 0,0194567  | -0,285758 |
| Receptor-type tyrosine-protein phosphatase S                                                                                                         | Ptprs   | 0,0135101  | -0,281629 |
| Plasma membrane calcium-transporting ATPase 2                                                                                                        | Atp2b2  | 0,0445413  | -0,280751 |
| Seizure 6-like protein 2                                                                                                                             | Sez6l2  | 0,0343279  | -0,280645 |
| Pyridoxal phosphate phosphatase                                                                                                                      | Pdxp    | 0,00186561 | -0,278858 |
| Triosephosphate isomerase                                                                                                                            | Tpi1    | 0,00964891 | -0,277064 |
| Peptidyl-prolyl cis-trans isomerase A;Peptidyl-prolyl cis-trans isomerase A, N-terminally processed                                                  | Ppia    | 0,0214661  | -0,276348 |
| Microtubule-associated protein 1B;MAP1B heavy chain;MAP1 light chain LC1                                                                             | Map1b   | 0,0390513  | -0,276253 |
| Tubulin beta-4A chain                                                                                                                                | Tubb4a  | 0,0358826  | -0,275682 |
| 1-phosphatidylinositol 4,5-bisphosphate phosphodiesterase beta-1                                                                                     | Plcb1   | 0,00200629 | -0,275423 |
| S-formylglutathione hydrolase                                                                                                                        | Esd     | 0,0402813  | -0,273135 |
| Peptidyl-glycine alpha-amidating monooxygenase;Peptidylglycine alpha-hydroxylating monooxygenase;Peptidyl-alpha-hydroxyglycine alpha-amidating lyase | Pam     | 0,0265435  | -0,270907 |
| Contactin-2                                                                                                                                          | Cntn2   | 7,03E-05   | -0,270561 |
| Pyruvate kinase PKM                                                                                                                                  | Pkm     | 0,00020225 | -0,266366 |
| Glycerol-3-phosphate dehydrogenase [NAD(+)], cytoplasmic                                                                                             | Gpd1    | 0,0389357  | -0,26103  |
| Guanine deaminase                                                                                                                                    | Gda     | 0,0237298  | -0,259609 |
| Protein lin-7 homolog A                                                                                                                              | Lin7a   | 0,0206621  | -0,25809  |
| Synapsin-2                                                                                                                                           | Syn2    | 0,00153716 | -0,257813 |
| Serine/threonine-protein kinase PAK 1                                                                                                                | Pak1    | 0,0447768  | -0,256448 |

## SUPPLEMENTARY DATA

|                                                                                                    |             |            |           |
|----------------------------------------------------------------------------------------------------|-------------|------------|-----------|
| Actin-related protein 3                                                                            | Actr3       | 0,0333353  | -0,25577  |
| Synaptojanin-1                                                                                     | Synj1       | 0,0138448  | -0,252625 |
| Dihydropyrimidinase-related protein 5                                                              | Dpysl5      | 0,0435425  | -0,248357 |
| Complement C1q subcomponent subunit C                                                              | C1qc        | 0,0135942  | -0,247862 |
| Cell adhesion molecule 2                                                                           | Cadm2       | 0,0110909  | -0,246252 |
| 10 kDa heat shock protein, mitochondrial                                                           | Hspe1       | 0,0327487  | -0,245597 |
| Plasma membrane calcium-transporting ATPase 1                                                      | Atp2b1      | 0,0176576  | -0,237075 |
| Limbic system-associated membrane protein                                                          | Lsamp       | 0,0304522  | -0,226448 |
| Hepatocyte cell adhesion molecule                                                                  | Hepacam     | 0,0480177  | -0,223953 |
| Peroxiredoxin-2                                                                                    | Prdx2       | 0,00070274 | -0,214137 |
| Peptidyl-prolyl cis-trans isomerase FKBP2                                                          | Fkbp2       | 0,0368394  | -0,211584 |
| Gamma-enolase                                                                                      | Eno2        | 0,0121139  | -0,207732 |
| Alpha-enolase                                                                                      | Eno1        | 0,0262533  | -0,206327 |
| Heat shock 70 kDa protein 4                                                                        | Hspa4       | 0,00577777 | -0,203736 |
| Disintegrin and metalloproteinase domain-containing protein 22                                     | Adam22      | 0,0472605  | -0,202838 |
| Myelin proteolipid protein                                                                         | Plp1        | 0,0498824  | -0,192176 |
| Phytanoyl-CoA hydroxylase-interacting protein                                                      | Phyhip      | 0,0192238  | -0,187138 |
| Metabotropic glutamate receptor 3                                                                  | Grm3        | 0,0253043  | -0,186429 |
| cAMP and cAMP-inhibited cGMP 3,5-cyclic phosphodiesterase 10A                                      | Pde10a      | 0,0378899  | -0,180001 |
| Phosphoglycerate mutase 1                                                                          | Pgam1       | 0,00984372 | -0,175351 |
| Sodium/potassium-transporting ATPase subunit beta-1                                                | Atp1b1      | 0,0303247  | 0,125028  |
| AP-3 complex subunit beta-2                                                                        | Ap3b2       | 0,0418043  | 0,190163  |
| Spectrin alpha chain, non-erythrocytic 1                                                           | Sptan1      | 0,0336763  | 0,206639  |
| Lipid phosphate phosphohydrolase 3                                                                 | Ppap2b      | 0,0389911  | 0,234509  |
| Protein canopy homolog 2                                                                           | Cnpy2       | 0,0305676  | 0,237334  |
| Calreticulin                                                                                       | Calr        | 0,0112935  | 0,247385  |
| Glutamate receptor ionotropic, NMDA 1                                                              | Grin1       | 0,00181066 | 0,261528  |
| Kinesin heavy chain isoform 5C;Kinesin heavy chain isoform 5A                                      | Kif5c;Kif5a | 0,0285377  | 0,273813  |
| Calnexin                                                                                           | Canx        | 0,046713   | 0,288438  |
| Glucosidase 2 subunit beta                                                                         | Prkcsb      | 0,0311902  | 0,292059  |
| Guanine nucleotide-binding protein G(q) subunit alpha                                              | Gnaq        | 0,0281511  | 0,312723  |
| Glycerophosphodiester phosphodiesterase 1                                                          | Gde1        | 0,0195668  | 0,313217  |
| Protein disulfide-isomerase A4                                                                     | Pdia4       | 0,0150703  | 0,329101  |
| Phospholipid hydroperoxide glutathione peroxidase, mitochondrial                                   | Gpx4        | 0,0392214  | 0,333228  |
| Hsc70-interacting protein                                                                          | St13        | 0,0100564  | 0,333854  |
| Heat shock protein 105 kDa                                                                         | Hsph1       | 0,046409   | 0,334838  |
| Vesicular glutamate transporter 2                                                                  | Slc17a6     | 1,14E-05   | 0,335764  |
| Peroxisomal multifunctional enzyme type 2;(3R)-hydroxyacyl-CoA dehydrogenase;Enoyl-CoA hydratase 2 | Hsd17b4     | 0,0434217  | 0,336483  |

## SUPPLEMENTARY DATA

|                                                                          |           |            |          |
|--------------------------------------------------------------------------|-----------|------------|----------|
| Myelin-oligodendrocyte glycoprotein                                      | Mog       | 0,00361114 | 0,337285 |
| Solute carrier family 12 member 2                                        | Slc12a2   | 0,0351091  | 0,341658 |
| Phospholipid scramblase 3                                                | Plscr3    | 0,042463   | 0,351989 |
| Spectrin beta chain, non-erythrocytic 1                                  | Sptbn1    | 0,0400787  | 0,354102 |
| Dolichyl-diphosphooligosaccharide--protein glycosyltransferase subunit 1 | Rpn1      | 0,00315349 | 0,360593 |
| CD82 antigen                                                             | Cd82      | 0,00741263 | 0,362056 |
| Ferritin light chain 1;Ferritin light chain 2                            | Ftl1;Ftl2 | 0,036461   | 0,375354 |
| Receptor expression-enhancing protein 5                                  | Reep5     | 0,0328789  | 0,376331 |
| Charged multivesicular body protein 4b                                   | Chmp4b    | 0,0482874  | 0,381227 |
| Transmembrane anterior posterior transformation protein 1                | Tapt1     | 0,0453768  | 0,383714 |
| Calcium/calmodulin-dependent protein kinase type II subunit beta         | Camk2b    | 0,00094263 | 0,388403 |
| Alpha-2-macroglobulin receptor-associated protein                        | Lrpap1    | 3,65E-05   | 0,388539 |
| Apolipoprotein E                                                         | Apoe      | 6,43E-05   | 0,402266 |
| RasGAP-activating-like protein 1                                         | Rasal1    | 0,0186051  | 0,429266 |
| Pyridoxal kinase                                                         | Pdxk      | 0,00183165 | 0,443192 |
| 1-acyl-sn-glycerol-3-phosphate acyltransferase gamma                     | Agpat3    | 0,01459    | 0,455274 |
| Reticulon-1                                                              | Rtn1      | 0,00153596 | 0,464526 |
| Cytochrome c oxidase subunit 5A, mitochondrial                           | Cox5a     | 0,0230363  | 0,51129  |
| Nicastrin                                                                | Nestn     | 0,0268334  | 0,523058 |
| Translocon-associated protein subunit alpha                              | Ssr1      | 0,0310374  | 0,539502 |
| Dehydrogenase/reductase SDR family member 7B                             | Dhrs7b    | 0,00279116 | 0,565834 |
| Lactadherin                                                              | Mfge8     | 0,00131446 | 0,574727 |
| Synaptosomal-associated protein 25                                       | Snap25    | 0,00553082 | 0,622547 |
| Vesicle-trafficking protein SEC22b                                       | Sec22b    | 0,0320022  | 0,625122 |
| Electron transfer flavoprotein-ubiquinone oxidoreductase, mitochondrial  | Etfdh     | 0,0335154  | 0,640536 |
| Vesicle-associated membrane protein 1                                    | Vamp1     | 0,00120657 | 0,655267 |
| LMBR1 domain-containing protein 2                                        | Lmbrd2    | 0,00712755 | 0,66335  |
| Cytochrome c oxidase subunit 4 isoform 1, mitochondrial                  | Cox4i1    | 0,0175318  | 0,671607 |
| Reticulon-4                                                              | Rtn4      | 0,00106566 | 0,682019 |
| DnaJ homolog subfamily B member 14                                       | Dnajb14   | 0,0235187  | 0,6901   |
| NADH-ubiquinone oxidoreductase chain 4                                   | Mtnd4     | 0,012359   | 0,693097 |
| Mitochondrial carrier homolog 1                                          | Mtch1     | 0,018545   | 0,714011 |
| Lysocardiolipin acyltransferase 1                                        | Lclat1    | 6,55E-05   | 0,71987  |
| ATP synthase F(0) complex subunit B1, mitochondrial                      | Atp5f1    | 0,00197803 | 0,722794 |
| Cytochrome c oxidase subunit 6C                                          | Cox6c     | 0,0441294  | 0,724306 |
| ATP synthase subunit d, mitochondrial                                    | Atp5h     | 0,0248417  | 0,766777 |
| Tropomyosin alpha-3 chain                                                | Tpm3      | 0,00040458 | 0,789339 |
| CDGSH iron-sulfur domain-containing protein 1                            | Cisd1     | 0,00854357 | 0,806722 |

## SUPPLEMENTARY DATA

|                                                                                    |             |            |          |
|------------------------------------------------------------------------------------|-------------|------------|----------|
| D-beta-hydroxybutyrate dehydrogenase, mitochondrial                                | Bdh1        | 0,00600024 | 0,81104  |
| Cytochrome b-c1 complex subunit 8                                                  | Uqcrq       | 0,0301921  | 0,816102 |
| NADH dehydrogenase [ubiquinone] 1 alpha subcomplex subunit 13                      | Ndufa13     | 0,0110922  | 0,816972 |
| NADH dehydrogenase [ubiquinone] 1 alpha subcomplex subunit 2                       | Ndufa2      | 0,0193902  | 0,839355 |
| Reticulon-3                                                                        | Rtn3        | 0,00673608 | 0,846282 |
| Vesicle-associated membrane protein 2; Vesicle-associated membrane protein 3       | Vamp2;Vamp3 | 0,00049857 | 0,850677 |
| Dynamin-like 120 kDa protein, mitochondrial; Dynamin-like 120 kDa protein, form S1 | Opa1        | 0,0145228  | 0,899061 |
| Cytochrome b-c1 complex subunit 7                                                  | Uqcrb       | 0,00563258 | 0,901214 |
| NADH dehydrogenase [ubiquinone] 1 alpha subcomplex subunit 8                       | Ndufa8      | 0,0105289  | 0,910365 |
| Syntenin-1                                                                         | Sdcbp       | 0,0204242  | 0,917818 |
| 3-beta-hydroxysteroid-Delta(8),Delta(7)-isomerase                                  | Ebp         | 0,0453309  | 0,972259 |
| Signal peptidase complex catalytic subunit SEC11A                                  | Sec11a      | 0,0253314  | 1,05461  |
| ATP synthase subunit f, mitochondrial                                              | Atp5j2      | 0,0394922  | 1,07322  |
| Serine beta-lactamase-like protein LACTB, mitochondrial                            | Lactb       | 0,0125943  | 1,09783  |
| ATP synthase subunit gamma, mitochondrial                                          | Atp5c1      | 0,0213714  | 1,13459  |
| Estradiol 17-beta-dehydrogenase 11                                                 | Hsd17b11    | 0,00978256 | 1,14358  |
| Vesicle transport through interaction with t-SNAREs homolog 1B                     | Vti1b       | 0,0121504  | 1,22727  |
| Sodium channel subunit beta-4                                                      | Scn4b       | 0,0495827  | 1,34848  |
| NADH dehydrogenase [ubiquinone] 1 beta subcomplex subunit 3                        | Ndufb3      | 0,022548   | 1,61427  |
| NADH dehydrogenase [ubiquinone] 1 beta subcomplex subunit 5, mitochondrial         | Ndufb5      | 0,0102803  | 1,71037  |
| Myelin and lymphocyte protein                                                      | Mal         | 0,00019388 | 1,84202  |
| ADP-ribosylation factor-like protein 6-interacting protein 1                       | Arl6ip1     | 0,00188507 | 2,09409  |

**Supplementary Table 5B.** KO-PFF vs KO-PBS,  $p < 0.05$ ,  $FC > 1.2$  ( $\log_2 FC > 0.263$  or  $< -0.263$ ).

| KO-PFF vs KO-PBS, $p < 0.05$ , $FC > 1.2$ ( $\log_2 FC > 0.263$ or $< -0.263$ )                                              |                            |            |                                                 |
|------------------------------------------------------------------------------------------------------------------------------|----------------------------|------------|-------------------------------------------------|
| T: Protein names                                                                                                             | T: Gene names              | p-value    | N: Student's T-test Difference<br>KO_PFF_KO_PBS |
| Acyl-CoA-binding protein                                                                                                     | Dbi                        | 0,00817609 | -2,09456                                        |
| Guanine nucleotide-binding protein G(I)/G(S)/G(O) subunit gamma-3                                                            | Gng3                       | 0,00244823 | -1,91068                                        |
| Sodium bicarbonate cotransporter 3                                                                                           | Slc4a7                     | 0,0140806  | -1,56295                                        |
| Actin, alpha cardiac muscle 1; Actin, alpha skeletal muscle; Actin, aortic smooth muscle; Actin, gamma-enteric smooth muscle | Actc1; Acta1; Acta2; Actg2 | 0,0272533  | -1,55483                                        |
| Platelet-activating factor acetylhydrolase IB subunit beta                                                                   | Pafah1b2                   | 0,0338423  | -1,52741                                        |

## SUPPLEMENTARY DATA

|                                                                                             |           |            |           |
|---------------------------------------------------------------------------------------------|-----------|------------|-----------|
| Histidine triad nucleotide-binding protein 1                                                | Hint1     | 0,0171272  | -1,43318  |
| Importin subunit beta-1                                                                     | Kpnb1     | 0,00039086 | -1,43178  |
| Astrocytic phosphoprotein PEA-15                                                            | Pea15     | 0,0299752  | -1,34819  |
| Macrophage migration inhibitory factor                                                      | Mif       | 1,48E-05   | -1,16353  |
| GTP-binding protein Rheb                                                                    | Rheb      | 0,0108055  | -1,10672  |
| Protein-L-isoaspartate(D-aspartate) O-methyltransferase                                     | Pcmt1     | 3,01E-05   | -1,05985  |
| Complexin-2                                                                                 | Cplx2     | 0,0463788  | -1,0514   |
| Inositol polyphosphate 1-phosphatase                                                        | Inpp1     | 0,0018729  | -1,03296  |
| Protein NDRG2                                                                               | Ndr2      | 2,26E-05   | -1,0303   |
| Coronin-1B                                                                                  | Coro1b    | 0,00529367 | -0,997421 |
| Cofilin-2                                                                                   | Cfl2      | 0,00099888 | -0,951125 |
| ES1 protein homolog, mitochondrial                                                          | D10Jhu81e | 0,0481777  | -0,943491 |
| Protein NDRG3                                                                               | Ndr3      | 0,00012264 | -0,942878 |
| Leucine-rich repeat-containing protein 57                                                   | Lrrc57    | 0,00010475 | -0,935154 |
| Protein NipSnap homolog 1                                                                   | Nipsnap1  | 0,0164158  | -0,931698 |
| Ribonuclease UK114                                                                          | Hrsp12    | 0,0280827  | -0,931002 |
| Serum paraoxonase/arylesterase 2                                                            | Pon2      | 0,0173761  | -0,912513 |
| Sodium-dependent dopamine transporter                                                       | Slc6a3    | 0,0440341  | -0,901412 |
| Sodium channel subunit beta-3                                                               | Scn3b     | 0,0449803  | -0,879667 |
| Leukotriene A-4 hydrolase                                                                   | Lta4h     | 0,0141554  | -0,877377 |
| Carbonyl reductase [NADPH] 1                                                                | Cbr1      | 2,33E-06   | -0,844957 |
| Neuroendocrine convertase 2                                                                 | Pcsk2     | 0,0293817  | -0,83938  |
| Cysteine and glycine-rich protein 1                                                         | Csrp1     | 0,0223411  | -0,837882 |
| Proteasome subunit alpha type-5                                                             | Psma5     | 0,0362792  | -0,836941 |
| Guanine nucleotide-binding protein G(olf) subunit alpha                                     | Gnal      | 0,0482619  | -0,828856 |
| Sepiapterin reductase                                                                       | Spr       | 0,00084869 | -0,818392 |
| Phosphoserine aminotransferase                                                              | Psat1     | 0,00048323 | -0,782838 |
| Cell division control protein 42 homolog                                                    | Cdc42     | 8,78E-05   | -0,771018 |
| CD9 antigen                                                                                 | Cd9       | 0,012934   | -0,74967  |
| D-3-phosphoglycerate dehydrogenase                                                          | Phgdh     | 0,00086742 | -0,745486 |
| Ras-related protein Rab-14                                                                  | Rab14     | 0,00699523 | -0,736525 |
| Neurochondrin                                                                               | Ncdn      | 0,00017128 | -0,727688 |
| Glyceraldehyde-3-phosphate dehydrogenase                                                    | Gapdh     | 0,00155551 | -0,718235 |
| Protein deglycase DJ-1                                                                      | Park7     | 0,00093718 | -0,691818 |
| Fatty acid-binding protein, heart                                                           | Fabp3     | 0,049605   | -0,687711 |
| Tubulin beta-3 chain                                                                        | Tubb3     | 0,00540736 | -0,679958 |
| Major prion protein                                                                         | Prnp      | 0,0271513  | -0,679542 |
| Myotrophin                                                                                  | Mtpn      | 0,00295595 | -0,677114 |
| Ras-related protein Rab-3C                                                                  | Rab3c     | 0,00166913 | -0,677108 |
| Cystatin-C                                                                                  | Cst3      | 0,00096186 | -0,675519 |
| Phosphatidylethanolamine-binding protein 1;Hippocampal cholinergic neurostimulating peptide | Pebp1     | 8,36E-07   | -0,67432  |

## SUPPLEMENTARY DATA

|                                                                                          |             |            |           |
|------------------------------------------------------------------------------------------|-------------|------------|-----------|
| GTP-binding nuclear protein Ran;GTP-binding nuclear protein Ran, testis-specific isoform | Ran;Ras12-9 | 0,0300006  | -0,671871 |
| Brain acid soluble protein 1                                                             | Basp1       | 0,00613399 | -0,66224  |
| Disintegrin and metalloproteinase domain-containing protein 11                           | Adam11      | 0,0243403  | -0,660918 |
| Glyoxylate reductase/hydroxypyruvate reductase                                           | Grhpr       | 0,00057559 | -0,652848 |
| L-lactate dehydrogenase A chain                                                          | Ldha        | 0,00015044 | -0,650262 |
| Neurologin-2                                                                             | Nlgn2       | 0,00180754 | -0,625692 |
| Syntaxin-binding protein 5-like                                                          | Stxbp5l     | 0,00704924 | -0,61817  |
| Glyoxalase domain-containing protein 4                                                   | Glod4       | 0,00013523 | -0,613326 |
| Flotillin-2                                                                              | Flot2       | 2,26E-06   | -0,60818  |
| Serine/threonine-protein phosphatase 5                                                   | Ppp5c       | 0,0236876  | -0,606544 |
| Peroxiredoxin-6                                                                          | Prdx6       | 6,70E-07   | -0,605497 |
| Syntaxin-binding protein 5                                                               | Stxbp5      | 0,00015339 | -0,599482 |
| Ras-related protein M-Ras                                                                | Mras        | 0,0159464  | -0,598251 |
| Calcium/calmodulin-dependent 3,5-cyclic nucleotide phosphodiesterase 1B                  | Pde1b       | 0,0301852  | -0,597213 |
| Haloacid dehalogenase-like hydrolase domain-containing protein 2                         | Hdhd2       | 0,032443   | -0,591879 |
| Tubulin beta-4B chain                                                                    | Tubb4b      | 0,0017794  | -0,590352 |
| Tubulin beta-2A chain                                                                    | Tubb2a      | 0,015937   | -0,584839 |
| Dynamin-1-like protein                                                                   | Dnm1l       | 0,00017378 | -0,584426 |
| Calcium-activated potassium channel subunit alpha-1                                      | Kcnma1      | 0,0208398  | -0,580834 |
| Septin-5                                                                                 | Σεπ-05      | 0,0184016  | -0,577302 |
| Guanine nucleotide-binding protein G(I)/G(S)/G(T) subunit beta-2                         | Gnb2        | 0,0119167  | -0,576919 |
| ATP-dependent 6-phosphofructokinase, liver type                                          | Pfk1        | 0,00194578 | -0,576255 |
| Malate dehydrogenase, mitochondrial                                                      | Mdh2        | 0,00013134 | -0,57241  |
| Phosphoglycerate kinase 1                                                                | Pgk1        | 1,48E-08   | -0,556076 |
| Neuronal cell adhesion molecule                                                          | Nrcam       | 0,00156922 | -0,555821 |
| Ketimine reductase mu-crystallin                                                         | Crym        | 0,00019154 | -0,555447 |
| V-type proton ATPase subunit d 1                                                         | Atp6v0d1    | 0,0384586  | -0,553741 |
| Dihydropyrimidinase-related protein 1                                                    | Crmp1       | 0,0102016  | -0,54886  |
| Dual specificity mitogen-activated protein kinase kinase 1                               | Map2k1      | 0,028886   | -0,544706 |
| Phosphoglucomutase-1                                                                     | Pgm1        | 7,72E-06   | -0,54276  |
| 14-3-3 protein gamma;14-3-3 protein gamma, N-terminally processed                        | Ywhag       | 0,0166587  | -0,540637 |
| Rho-related GTP-binding protein RhoB                                                     | Rhob        | 0,00583397 | -0,537586 |
| Flotillin-1                                                                              | Flot1       | 3,29E-05   | -0,535885 |
| Solute carrier family 2, facilitated glucose transporter member 3                        | Slc2a3      | 0,0217972  | -0,534663 |
| Peptidyl-prolyl cis-trans isomerase FKBP1A                                               | Fkbp1a      | 0,0309809  | -0,532517 |
| Septin-6                                                                                 | Σεπ-06      | 0,0105743  | -0,530615 |
| Fructose-bisphosphate aldolase A                                                         | Aldoa       | 3,87E-07   | -0,530046 |

## SUPPLEMENTARY DATA

|                                                                                                                                                                                                                                                                                                                                 |                      |            |           |
|---------------------------------------------------------------------------------------------------------------------------------------------------------------------------------------------------------------------------------------------------------------------------------------------------------------------------------|----------------------|------------|-----------|
| Acetyl-CoA acetyltransferase, mitochondrial                                                                                                                                                                                                                                                                                     | Acat1                | 0,0002381  | -0,527613 |
| Fructose-bisphosphate aldolase C                                                                                                                                                                                                                                                                                                | Aldoc                | 4,06E-06   | -0,526711 |
| Prosaposin receptor GPR37L1                                                                                                                                                                                                                                                                                                     | Gpr37l1              | 0,0313664  | -0,523607 |
| Ras-related protein Rab-5A                                                                                                                                                                                                                                                                                                      | Rab5a                | 0,00219528 | -0,520837 |
| Ubiquitin carboxyl-terminal hydrolase isozyme L1                                                                                                                                                                                                                                                                                | Uchl1                | 0,00035186 | -0,510066 |
| Aldose reductase                                                                                                                                                                                                                                                                                                                | Akr1b1               | 0,0244747  | -0,507752 |
| AP-2 complex subunit alpha-1                                                                                                                                                                                                                                                                                                    | Ap2a1                | 0,0242061  | -0,507577 |
| Neurologin-3                                                                                                                                                                                                                                                                                                                    | Nlgn3                | 0,00796357 | -0,505842 |
| Tubulin alpha-4A chain                                                                                                                                                                                                                                                                                                          | Tuba4a               | 0,00395975 | -0,505331 |
| Actin, cytoplasmic 2;Actin, cytoplasmic 2, N-terminally processed                                                                                                                                                                                                                                                               | Actg1                | 0,00146253 | -0,501407 |
| Lymphocyte antigen 6H                                                                                                                                                                                                                                                                                                           | Ly6h                 | 0,0490953  | -0,501158 |
| Ras-related C3 botulinum toxin substrate 1;Ras-related C3 botulinum toxin substrate 2                                                                                                                                                                                                                                           | Rac1;Rac2            | 0,0208637  | -0,500521 |
| Ephrin type-A receptor 4                                                                                                                                                                                                                                                                                                        | Epha4                | 5,76E-05   | -0,498359 |
| T-complex protein 1 subunit gamma                                                                                                                                                                                                                                                                                               | Cct3                 | 0,00597445 | -0,49482  |
| Dihydropteridine reductase                                                                                                                                                                                                                                                                                                      | Qdpr                 | 0,0120558  | -0,49181  |
| Ras-related protein Rap-2a;Ras-related protein Rap-2c                                                                                                                                                                                                                                                                           | Rap2a;Rap2c          | 0,00358804 | -0,490649 |
| cAMP-dependent protein kinase type II-beta regulatory subunit                                                                                                                                                                                                                                                                   | Prkar2b              | 0,0395885  | -0,489111 |
| 4-aminobutyrate aminotransferase, mitochondrial                                                                                                                                                                                                                                                                                 | Abat                 | 0,00011522 | -0,488835 |
| Glycerol-3-phosphate dehydrogenase 1-like protein                                                                                                                                                                                                                                                                               | Gpd1l                | 0,0336162  | -0,488586 |
| Thioredoxin                                                                                                                                                                                                                                                                                                                     | Txn                  | 0,0167098  | -0,476328 |
| Ubiquitin-like modifier-activating enzyme 1                                                                                                                                                                                                                                                                                     | Uba1                 | 0,00024045 | -0,47531  |
| T-complex protein 1 subunit delta                                                                                                                                                                                                                                                                                               | Cct4                 | 0,00645813 | -0,47463  |
| Gamma-aminobutyric acid receptor subunit beta-1                                                                                                                                                                                                                                                                                 | Gabrb1               | 0,00665247 | -0,47445  |
| Neuronal growth regulator 1                                                                                                                                                                                                                                                                                                     | Negr1                | 0,000211   | -0,47021  |
| Elongation factor 1-alpha 2                                                                                                                                                                                                                                                                                                     | Eef1a2               | 0,00478054 | -0,467722 |
| Serine/threonine-protein phosphatase PP1-beta catalytic subunit;Serine/threonine-protein phosphatase PP1-alpha catalytic subunit;Serine/threonine-protein phosphatase PP1-gamma catalytic subunit                                                                                                                               | Ppp1cb;Ppp1ca;Ppp1cc | 0,00015993 | -0,467268 |
| Ras-related protein Rab-7a                                                                                                                                                                                                                                                                                                      | Rab7a                | 0,00517159 | -0,464121 |
| Cofilin-1                                                                                                                                                                                                                                                                                                                       | Cfl1                 | 0,0477064  | -0,463641 |
| Fatty acid synthase;[Acyl-carrier-protein] S-acetyltransferase;[Acyl-carrier-protein] S-malonyltransferase;3-oxoacyl-[acyl-carrier-protein] synthase;3-oxoacyl-[acyl-carrier-protein] reductase;3-hydroxyacyl-[acyl-carrier-protein] dehydratase;Enoyl-[acyl-carrier-protein] reductase;Oleoyl-[acyl-carrier-protein] hydrolase | Fasn                 | 0,0427446  | -0,463297 |
| Sortilin                                                                                                                                                                                                                                                                                                                        | Sort1                | 0,0147674  | -0,45391  |
| Carbonic anhydrase 2                                                                                                                                                                                                                                                                                                            | Ca2                  | 0,00043591 | -0,452523 |



## SUPPLEMENTARY DATA

|                                                                                                                                                                                                                                                                     |               |            |           |
|---------------------------------------------------------------------------------------------------------------------------------------------------------------------------------------------------------------------------------------------------------------------|---------------|------------|-----------|
| V-type proton ATPase subunit B, brain isoform                                                                                                                                                                                                                       | Atp6v1b2      | 0,00198056 | -0,449637 |
| Peroxiredoxin-5, mitochondrial                                                                                                                                                                                                                                      | Prdx5         | 0,00131965 | -0,446826 |
| Vesicle-fusing ATPase                                                                                                                                                                                                                                               | Nsf           | 0,00062561 | -0,446817 |
| Adenosylhomocysteinase                                                                                                                                                                                                                                              | Ahcy          | 5,31E-05   | -0,443701 |
| Lactoylglutathione lyase                                                                                                                                                                                                                                            | Glo1          | 0,0135791  | -0,443697 |
| Ras-related protein Rab-3A                                                                                                                                                                                                                                          | Rab3a         | 0,0304531  | -0,442746 |
| Isocitrate dehydrogenase [NADP] cytoplasmic                                                                                                                                                                                                                         | Idh1          | 0,0095195  | -0,440855 |
| Ubiquitin-conjugating enzyme E2 variant 1;Ubiquitin-conjugating enzyme E2 variant 2                                                                                                                                                                                 | Ube2v1;Ube2v2 | 0,0154793  | -0,430401 |
| LanC-like protein 1                                                                                                                                                                                                                                                 | Lancl1        | 0,0125916  | -0,429955 |
| Beta-synuclein                                                                                                                                                                                                                                                      | Sncb          | 0,0225067  | -0,427728 |
| Nucleoside diphosphate kinase A                                                                                                                                                                                                                                     | Nme1          | 3,94E-05   | -0,427659 |
| Adenylate kinase isoenzyme 1                                                                                                                                                                                                                                        | Ak1           | 0,0271057  | -0,426385 |
| Intercellular adhesion molecule 5                                                                                                                                                                                                                                   | Icam5         | 0,0286459  | -0,426317 |
| Neurotrimin                                                                                                                                                                                                                                                         | Ntm           | 0,00232226 | -0,42341  |
| Neurofascin                                                                                                                                                                                                                                                         | Nfasc         | 8,30E-05   | -0,423123 |
| Rab GDP dissociation inhibitor alpha                                                                                                                                                                                                                                | Gdi1          | 5,03E-07   | -0,42267  |
| Coronin-1A                                                                                                                                                                                                                                                          | Coro1a        | 0,0238384  | -0,422566 |
| Serine/threonine-protein phosphatase 2B catalytic subunit alpha isoform                                                                                                                                                                                             | Ppp3ca        | 6,49E-06   | -0,418474 |
| Tubulin alpha-1B chain                                                                                                                                                                                                                                              | Tuba1b        | 0,0090378  | -0,418199 |
| AP-2 complex subunit alpha-2                                                                                                                                                                                                                                        | Ap2a2         | 0,00012579 | -0,415173 |
| Calsyntenin-1;Soluble Alc-alpha;CTF1-alpha                                                                                                                                                                                                                          | Clstn1        | 0,0115235  | -0,412784 |
| ATP-citrate synthase                                                                                                                                                                                                                                                | Acly          | 0,00136721 | -0,411176 |
| Protein tweety homolog 1                                                                                                                                                                                                                                            | Ttyh1         | 0,047638   | -0,408899 |
| NAD-dependent protein deacetylase sirtuin-2                                                                                                                                                                                                                         | Sirt2         | 0,0130025  | -0,406427 |
| Glucose 1,6-bisphosphate synthase                                                                                                                                                                                                                                   | Pgm211        | 0,00045203 | -0,406136 |
| Dual specificity protein phosphatase 3                                                                                                                                                                                                                              | Dusp3         | 0,00749279 | -0,403811 |
| Immunoglobulin superfamily member 8                                                                                                                                                                                                                                 | Igsf8         | 0,0218314  | -0,398635 |
| Alcohol dehydrogenase class-3                                                                                                                                                                                                                                       | Adh5          | 0,0181444  | -0,394361 |
| Poly(rC)-binding protein 1                                                                                                                                                                                                                                          | Pcbp1         | 0,0337833  | -0,393804 |
| Citrate synthase, mitochondrial                                                                                                                                                                                                                                     | Cs            | 0,0268807  | -0,385009 |
| ER membrane protein complex subunit 1                                                                                                                                                                                                                               | Emc1          | 0,0315282  | -0,384979 |
| Isoaspartyl peptidase/L-asparaginase;Isoaspartyl peptidase/L-asparaginase alpha chain;Isoaspartyl peptidase/L-asparaginase beta chain                                                                                                                               | Asrgl1        | 0,00425301 | -0,383783 |
| Glutamate receptor ionotropic, NMDA 2A                                                                                                                                                                                                                              | Grin2a        | 0,0482563  | -0,382026 |
| Pro-low-density lipoprotein receptor-related protein 1;Low-density lipoprotein receptor-related protein 1 85 kDa subunit;Low-density lipoprotein receptor-related protein 1 515 kDa subunit;Low-density lipoprotein receptor-related protein 1 intracellular domain | Lrp1          | 5,79E-05   | -0,376531 |

## SUPPLEMENTARY DATA

|                                                                                                   |          |            |           |
|---------------------------------------------------------------------------------------------------|----------|------------|-----------|
| Protein KIAA1045                                                                                  | Kiaa1045 | 0,00250537 | -0,37543  |
| Neural cell adhesion molecule L1                                                                  | L1cam    | 0,0140013  | -0,374525 |
| Cell adhesion molecule 1                                                                          | Cadm1    | 0,00561133 | -0,373428 |
| Protein FAM49B                                                                                    | Fam49b   | 0,00052499 | -0,373423 |
| V-type proton ATPase catalytic subunit A                                                          | Atp6v1a  | 0,00011807 | -0,371904 |
| Aspartate aminotransferase, cytoplasmic                                                           | Got1     | 0,00253987 | -0,370361 |
| Heat shock cognate 71 kDa protein                                                                 | Hspa8    | 9,36E-05   | -0,368101 |
| Serine/threonine-protein phosphatase 2A catalytic subunit alpha isoform                           | Ppp2ca   | 1,66E-05   | -0,365635 |
| D-dopachrome decarboxylase                                                                        | Ddt      | 0,0156622  | -0,363324 |
| Cell adhesion molecule 4                                                                          | Cadm4    | 0,00287226 | -0,357646 |
| Serine-threonine kinase receptor-associated protein                                               | Strap    | 0,0298398  | -0,35353  |
| Isocitrate dehydrogenase [NAD] subunit alpha, mitochondrial                                       | Idh3a    | 0,0248359  | -0,351014 |
| Coactosin-like protein                                                                            | Cot1l    | 0,0143664  | -0,350022 |
| Glycogen phosphorylase, brain form                                                                | Pygb     | 0,0200512  | -0,348934 |
| Versican core protein                                                                             | Vcan     | 0,0080338  | -0,345983 |
| Metabotropic glutamate receptor 2                                                                 | Grm2     | 0,0221661  | -0,341079 |
| Seizure 6-like protein                                                                            | Sez6l    | 0,0295732  | -0,340528 |
| Guanine nucleotide-binding protein subunit alpha-11                                               | Gna11    | 0,0001408  | -0,340195 |
| Clathrin heavy chain 1                                                                            | Cltc     | 0,00056118 | -0,335357 |
| Sphingomyelin phosphodiesterase 3                                                                 | Smpd3    | 0,00372672 | -0,334701 |
| Cytosolic acyl coenzyme A thioester hydrolase                                                     | Acot7    | 0,0410091  | -0,333623 |
| Transitional endoplasmic reticulum ATPase                                                         | Vcp      | 2,53E-05   | -0,330465 |
| Adenylyl cyclase-associated protein 2                                                             | Cap2     | 0,00021804 | -0,324674 |
| Leucine-rich repeat and immunoglobulin-like domain-containing nogo receptor-interacting protein 1 | Lingo1   | 0,00509864 | -0,323042 |
| Aconitate hydratase, mitochondrial                                                                | Aco2     | 0,00363147 | -0,317393 |
| AP-2 complex subunit beta                                                                         | Ap2b1    | 0,0346899  | -0,316829 |
| Ectonucleoside triphosphate diphosphohydrolase 2                                                  | Entpd2   | 0,0308525  | -0,313722 |
| L-lactate dehydrogenase B chain                                                                   | Ldhb     | 0,00065215 | -0,313295 |
| Syntaxin-binding protein 1                                                                        | Stxbp1   | 0,00428081 | -0,312118 |
| Ubiquitin thioesterase OTUB1                                                                      | Otub1    | 0,0408591  | -0,311559 |
| Cullin-associated NEDD8-dissociated protein 1                                                     | Cand1    | 0,00184347 | -0,310369 |
| Heat shock 70 kDa protein 12A                                                                     | Hspa12a  | 0,0405681  | -0,299874 |
| Dynamin-1                                                                                         | Dnm1     | 0,00113804 | -0,299489 |
| Actin-related protein 2/3 complex subunit 4                                                       | Arpc4    | 0,0216264  | -0,29682  |
| Hematopoietic progenitor cell antigen CD34                                                        | Cd34     | 0,00978274 | -0,293865 |
| Synaptic vesicle glycoprotein 2A                                                                  | Sv2a     | 0,025674   | -0,293646 |
| Transketolase                                                                                     | Tkt      | 0,0286508  | -0,293236 |
| Protein kinase C gamma type                                                                       | Prkcg    | 0,0329119  | -0,289643 |

# SUPPLEMENTARY DATA

|                                                                                                                                                      |             |            |           |
|------------------------------------------------------------------------------------------------------------------------------------------------------|-------------|------------|-----------|
| Glutamine synthetase                                                                                                                                 | Glul        | 0,0194567  | -0,285758 |
| Receptor-type tyrosine-protein phosphatase S                                                                                                         | Ptprs       | 0,0135101  | -0,281629 |
| Plasma membrane calcium-transporting ATPase 2                                                                                                        | Atp2b2      | 0,0445413  | -0,280751 |
| Seizure 6-like protein 2                                                                                                                             | Sez6l2      | 0,0343279  | -0,280645 |
| Pyridoxal phosphate phosphatase                                                                                                                      | Pdpx        | 0,00186561 | -0,278858 |
| Triosephosphate isomerase                                                                                                                            | Tpi1        | 0,00964891 | -0,277064 |
| Peptidyl-prolyl cis-trans isomerase A;Peptidyl-prolyl cis-trans isomerase A, N-terminally processed                                                  | Ppia        | 0,0214661  | -0,276348 |
| Microtubule-associated protein 1B;MAP1B heavy chain;MAP1 light chain LC1                                                                             | Map1b       | 0,0390513  | -0,276253 |
| Tubulin beta-4A chain                                                                                                                                | Tubb4a      | 0,0358826  | -0,275682 |
| 1-phosphatidylinositol 4,5-bisphosphate phosphodiesterase beta-1                                                                                     | Plcb1       | 0,00200629 | -0,275423 |
| S-formylglutathione hydrolase                                                                                                                        | Esd         | 0,0402813  | -0,273135 |
| Peptidyl-glycine alpha-amidating monooxygenase;Peptidylglycine alpha-hydroxylating monooxygenase;Peptidyl-alpha-hydroxyglycine alpha-amidating lyase | Pam         | 0,0265435  | -0,270907 |
| Contactin-2                                                                                                                                          | Cntn2       | 7,03E-05   | -0,270561 |
| Pyruvate kinase PKM                                                                                                                                  | Pkm         | 0,00020225 | -0,266366 |
| Kinesin heavy chain isoform 5C;Kinesin heavy chain isoform 5A                                                                                        | Kif5c;Kif5a | 0,0285377  | 0,273813  |
| Calnexin                                                                                                                                             | Canx        | 0,046713   | 0,288438  |
| Glucosidase 2 subunit beta                                                                                                                           | Prkesh      | 0,0311902  | 0,292059  |
| Guanine nucleotide-binding protein G(q) subunit alpha                                                                                                | Gnaq        | 0,0281511  | 0,312723  |
| Glycerophosphodiester phosphodiesterase 1                                                                                                            | Gde1        | 0,0195668  | 0,313217  |
| Protein disulfide-isomerase A4                                                                                                                       | Pdia4       | 0,0150703  | 0,329101  |
| Phospholipid hydroperoxide glutathione peroxidase, mitochondrial                                                                                     | Gpx4        | 0,0392214  | 0,333228  |
| Hsc70-interacting protein                                                                                                                            | St13        | 0,0100564  | 0,333854  |
| Heat shock protein 105 kDa                                                                                                                           | Hsph1       | 0,046409   | 0,334838  |
| Vesicular glutamate transporter 2                                                                                                                    | Slc17a6     | 1,14E-05   | 0,335764  |
| Peroxisomal multifunctional enzyme type 2;(3R)-hydroxyacyl-CoA dehydrogenase;Enoyl-CoA hydratase 2                                                   | Hsd17b4     | 0,0434217  | 0,336483  |
| Myelin-oligodendrocyte glycoprotein                                                                                                                  | Mog         | 0,00361114 | 0,337285  |
| Solute carrier family 12 member 2                                                                                                                    | Slc12a2     | 0,0351091  | 0,341658  |
| Phospholipid scramblase 3                                                                                                                            | Plscr3      | 0,042463   | 0,351989  |
| Spectrin beta chain, non-erythrocytic 1                                                                                                              | Sptbn1      | 0,0400787  | 0,354102  |
| Dolichyl-diphosphooligosaccharide--protein glycosyltransferase subunit 1                                                                             | Rpn1        | 0,00315349 | 0,360593  |
| CD82 antigen                                                                                                                                         | Cd82        | 0,00741263 | 0,362056  |
| Ferritin light chain 1;Ferritin light chain 2                                                                                                        | Ftl1;Ftl2   | 0,036461   | 0,375354  |
| Receptor expression-enhancing protein 5                                                                                                              | Reep5       | 0,0328789  | 0,376331  |
| Charged multivesicular body protein 4b                                                                                                               | Chmp4b      | 0,0482874  | 0,381227  |

## SUPPLEMENTARY DATA

|                                                                              |             |            |          |
|------------------------------------------------------------------------------|-------------|------------|----------|
| Transmembrane anterior posterior transformation protein 1                    | Tapt1       | 0,0453768  | 0,383714 |
| Calcium/calmodulin-dependent protein kinase type II subunit beta             | Camk2b      | 0,00094263 | 0,388403 |
| Alpha-2-macroglobulin receptor-associated protein                            | Lrpap1      | 3,65E-05   | 0,388539 |
| Apolipoprotein E                                                             | Apoe        | 6,43E-05   | 0,402266 |
| RasGAP-activating-like protein 1                                             | Rasal1      | 0,0186051  | 0,429266 |
| Pyridoxal kinase                                                             | Pdxk        | 0,00183165 | 0,443192 |
| 1-acyl-sn-glycerol-3-phosphate acyltransferase gamma                         | Agpat3      | 0,01459    | 0,455274 |
| Reticulon-1                                                                  | Rtn1        | 0,00153596 | 0,464526 |
| Cytochrome c oxidase subunit 5A, mitochondrial                               | Cox5a       | 0,0230363  | 0,51129  |
| Nicastrin                                                                    | Ncstn       | 0,0268334  | 0,523058 |
| Translocon-associated protein subunit alpha                                  | Ssr1        | 0,0310374  | 0,539502 |
| Dehydrogenase/reductase SDR family member 7B                                 | Dhrs7b      | 0,00279116 | 0,565834 |
| Lactadherin                                                                  | Mfge8       | 0,00131446 | 0,574727 |
| Synaptosomal-associated protein 25                                           | Snap25      | 0,00553082 | 0,622547 |
| Vesicle-trafficking protein SEC22b                                           | Sec22b      | 0,0320022  | 0,625122 |
| Electron transfer flavoprotein-ubiquinone oxidoreductase, mitochondrial      | Etfdh       | 0,0335154  | 0,640536 |
| Vesicle-associated membrane protein 1                                        | Vamp1       | 0,00120657 | 0,655267 |
| LMBR1 domain-containing protein 2                                            | Lmbrd2      | 0,00712755 | 0,66335  |
| Cytochrome c oxidase subunit 4 isoform 1, mitochondrial                      | Cox4i1      | 0,0175318  | 0,671607 |
| Reticulon-4                                                                  | Rtn4        | 0,00106566 | 0,682019 |
| DnaJ homolog subfamily B member 14                                           | Dnajb14     | 0,0235187  | 0,6901   |
| NADH-ubiquinone oxidoreductase chain 4                                       | Mtnd4       | 0,012359   | 0,693097 |
| Mitochondrial carrier homolog 1                                              | Mtch1       | 0,018545   | 0,714011 |
| Lysocardiolipin acyltransferase 1                                            | Lclat1      | 6,55E-05   | 0,71987  |
| ATP synthase F(0) complex subunit B1, mitochondrial                          | Atp5f1      | 0,00197803 | 0,722794 |
| Cytochrome c oxidase subunit 6C                                              | Cox6c       | 0,0441294  | 0,724306 |
| ATP synthase subunit d, mitochondrial                                        | Atp5h       | 0,0248417  | 0,766777 |
| Tropomyosin alpha-3 chain                                                    | Tpm3        | 0,00040458 | 0,789339 |
| CDGSH iron-sulfur domain-containing protein 1                                | Cisd1       | 0,00854357 | 0,806722 |
| D-beta-hydroxybutyrate dehydrogenase, mitochondrial                          | Bdh1        | 0,00600024 | 0,81104  |
| Cytochrome b-c1 complex subunit 8                                            | Uqcrcq      | 0,0301921  | 0,816102 |
| NADH dehydrogenase [ubiquinone] 1 alpha subcomplex subunit 13                | Ndufa13     | 0,0110922  | 0,816972 |
| NADH dehydrogenase [ubiquinone] 1 alpha subcomplex subunit 2                 | Ndufa2      | 0,0193902  | 0,839355 |
| Reticulon-3                                                                  | Rtn3        | 0,00673608 | 0,846282 |
| Vesicle-associated membrane protein 2; Vesicle-associated membrane protein 3 | Vamp2;Vamp3 | 0,00049857 | 0,850677 |

## SUPPLEMENTARY DATA

|                                                                                    |          |            |          |
|------------------------------------------------------------------------------------|----------|------------|----------|
| Dynamin-like 120 kDa protein, mitochondrial; Dynamin-like 120 kDa protein, form S1 | Opa1     | 0,0145228  | 0,899061 |
| Cytochrome b-c1 complex subunit 7                                                  | Uqcrb    | 0,00563258 | 0,901214 |
| NADH dehydrogenase [ubiquinone] 1 alpha subcomplex subunit 8                       | Ndufa8   | 0,0105289  | 0,910365 |
| Syntenin-1                                                                         | Sdcbp    | 0,0204242  | 0,917818 |
| 3-beta-hydroxysteroid-Delta(8),Delta(7)-isomerase                                  | Ebp      | 0,0453309  | 0,972259 |
| Signal peptidase complex catalytic subunit SEC11A                                  | Sec11a   | 0,0253314  | 1,05461  |
| ATP synthase subunit f, mitochondrial                                              | Atp5j2   | 0,0394922  | 1,07322  |
| Serine beta-lactamase-like protein LACTB, mitochondrial                            | Lactb    | 0,0125943  | 1,09783  |
| ATP synthase subunit gamma, mitochondrial                                          | Atp5c1   | 0,0213714  | 1,13459  |
| Estradiol 17-beta-dehydrogenase 11                                                 | Hsd17b11 | 0,00978256 | 1,14358  |
| Vesicle transport through interaction with t-SNAREs homolog 1B                     | Vti1b    | 0,0121504  | 1,22727  |
| Sodium channel subunit beta-4                                                      | Scn4b    | 0,0495827  | 1,34848  |
| NADH dehydrogenase [ubiquinone] 1 beta subcomplex subunit 3                        | Ndufb3   | 0,022548   | 1,61427  |
| NADH dehydrogenase [ubiquinone] 1 beta subcomplex subunit 5, mitochondrial         | Ndufb5   | 0,0102803  | 1,71037  |
| Myelin and lymphocyte protein                                                      | Mal      | 0,00019388 | 1,84202  |
| ADP-ribosylation factor-like protein 6-interacting protein 1                       | Arl6ip1  | 0,00188507 | 2,09409  |

**Supplementary Table 6. Antibodies.**

| Primary Antibodies                                      | Company                              | Species | Cat. No.  | Working Dilution                  |
|---------------------------------------------------------|--------------------------------------|---------|-----------|-----------------------------------|
| anti- $\alpha$ -Synuclein C20 (human, mouse, rat)       | Santa Cruz, polyclonal               | Rabbit  | sc-70-11  | 1:1000 WB                         |
| anti- $\alpha$ -Synuclein Syn1 (human, mouse, rat)      | BD biosciences, monoclonal           | Mouse   | 610787    | 1:1000 WB                         |
| anti-pS129 $\alpha$ -Synuclein                          | Abcam, monoclonal                    | Rabbit  | ab51235   | 1:1000 WB<br>1:2000 IHC           |
| anti-pS129 $\alpha$ -Synuclein (Clone 5B9)              | Gift from Omar el Agnaf, monoclonal* | Mouse   |           | 1:1000 IHC                        |
| anti-Flotillin-1                                        | Santa Cruz, monoclonal               | Mouse   | sc-133153 | 1:1000 WB                         |
| anti- $\alpha$ -Syn conformation-specific MJFR-14-6-4-2 | Abcam, monoclonal                    | Rabbit  | ab209538  | 1:50.000, Dot Blot<br>1:2000, IHC |
| anti-Tyrosine hydroxylase                               | Merck-Millipore, polyclonal          | Rabbit  | AB152     | 1:2000 IHC                        |
| anti-Tyrosine hydroxylase                               | Merck-Millipore, monoclonal          | Mouse   | MAB318    | 1:2000 IHC                        |
| anti-GFAP                                               | DAKO, polyclonal                     | Rabbit  | Z033401-2 | 1:750 IHC                         |
| anti-Iba-1                                              | Merck-Millipore, monoclonal          | Mouse   | MABN92    | 1:500, IHC                        |
| anti-PSD-95                                             | Cell Signaling, monoclonal           | Rabbit  | D27E11    | 1:500, IHC                        |

## SUPPLEMENTARY DATA

|                                                 |                     |        |          |             |
|-------------------------------------------------|---------------------|--------|----------|-------------|
| anti-synaptobrevin (VAMP2)                      | SySy, monoclonal    | Mouse  | 104 211  | 1:500, IHC  |
| anti-p62 (SQSTM1)                               | MBL, polyclonal     | Rabbit | PM045    | 1:1000, IHC |
| anti-Ubiquitin                                  | Abcam, polyclonal   | Rabbit | ab7780   | 1:200, IHC  |
| anti-Neuronal Class III $\beta$ -Tubulin (TUJ1) | Covance, monoclonal | Mouse  | MMS-435P | 1:2000 IHC  |

\* <https://doi.org/10.1016/j.neulet.2020.134899>

| <b>Secondary Antibodies</b>        | <b>Company</b>                       | <b>Cat. No.</b> | <b>Working Dilution</b> |
|------------------------------------|--------------------------------------|-----------------|-------------------------|
| Alexa Fluor 488 Donkey anti-Mouse  | Invitrogen-Thermo Fischer Scientific | A21202          | 1:2000 IHC              |
| Alexa Fluor 568 Donkey anti-Mouse  | Invitrogen-Thermo Fischer Scientific | A10037          | 1:2000 IHC              |
| Alexa Fluor 488 Goat anti-Rabbit   | Invitrogen-Thermo Fischer Scientific | A11034          | 1:2000 IHC              |
| Alexa Fluor 568 Donkey anti-Rabbit | Invitrogen-Thermo Fischer Scientific | A10042          | 1:2000 IHC              |
| Goat anti-Mouse HRP                | Merck-Millipore                      | AP124P          | 1:5000 WB,<br>Dot blot  |
| Goat anti-Rabbit HRP               | Merck-Millipore                      | AP132P          | 1:5000 WB,<br>Dot blot  |
